# Supplementary material for: Effect of intensive treatment for schistosomiasis on immune responses to vaccines among rural Ugandan island adolescents: randomised controlled trial protocol A for the ‘POPulation differences in VACcine responses’ (POPVAC) programme
Source: PubMed Central journal article supplement (PMC7888376; doi:10.1136/bmjopen-2020-040426), 2021-02-16
Supplement: bmjopen-2020-040426.draft_revisions.pdf [file bmjopen-2020-040426.draft_revisions.pdf]

# BMJ Open

BMJ Open is committed to open peer review. As part of this commitment we make the peer review history of every article we publish publicly available.

When an article is published we post the peer reviewers' comments and the authors' responses online. We also post the versions of the paper that were used during peer review. These are the versions that the peer review comments apply to.

The versions of the paper that follow are the versions that were submitted during the peer review process. They are not the versions of record or the final published versions. They should not be cited or distributed as the published version of this manuscript.

BMJ Open is an open access journal and the full, final, typeset and author-corrected version of record of the manuscript is available on our site with no access controls, subscription charges or pay-per-view fees (<http://bmjopen.bmj.com>).

If you have any questions on BMJ Open's open peer review process please email [info.bmjopen@bmj.com](mailto:info.bmjopen@bmj.com)

# BMJ Open

**The effect of intensive treatment for schistosomiasis on immune responses to vaccines among rural Ugandan island adolescents: randomised controlled trial protocol A for the 'POPulation differences in VACcine responses' (POPVAC) programme**

|                               |                                                                                                                                                                                                                                                                                                                                                                                                                                                                                                                                                                                                                                                                                                                                                                                                                                                                                                                                                                                                                                                                                                                                                                                                                                                                                                                                                                                                                                                                                                                                                                                                                                                                                                                                                                                                                                                                                                                                                                                                                                                                                                              |
|-------------------------------|--------------------------------------------------------------------------------------------------------------------------------------------------------------------------------------------------------------------------------------------------------------------------------------------------------------------------------------------------------------------------------------------------------------------------------------------------------------------------------------------------------------------------------------------------------------------------------------------------------------------------------------------------------------------------------------------------------------------------------------------------------------------------------------------------------------------------------------------------------------------------------------------------------------------------------------------------------------------------------------------------------------------------------------------------------------------------------------------------------------------------------------------------------------------------------------------------------------------------------------------------------------------------------------------------------------------------------------------------------------------------------------------------------------------------------------------------------------------------------------------------------------------------------------------------------------------------------------------------------------------------------------------------------------------------------------------------------------------------------------------------------------------------------------------------------------------------------------------------------------------------------------------------------------------------------------------------------------------------------------------------------------------------------------------------------------------------------------------------------------|
| Journal:                      | <i>BMJ Open</i>                                                                                                                                                                                                                                                                                                                                                                                                                                                                                                                                                                                                                                                                                                                                                                                                                                                                                                                                                                                                                                                                                                                                                                                                                                                                                                                                                                                                                                                                                                                                                                                                                                                                                                                                                                                                                                                                                                                                                                                                                                                                                              |
| Manuscript ID                 | bmjopen-2020-040426                                                                                                                                                                                                                                                                                                                                                                                                                                                                                                                                                                                                                                                                                                                                                                                                                                                                                                                                                                                                                                                                                                                                                                                                                                                                                                                                                                                                                                                                                                                                                                                                                                                                                                                                                                                                                                                                                                                                                                                                                                                                                          |
| Article Type:                 | Protocol                                                                                                                                                                                                                                                                                                                                                                                                                                                                                                                                                                                                                                                                                                                                                                                                                                                                                                                                                                                                                                                                                                                                                                                                                                                                                                                                                                                                                                                                                                                                                                                                                                                                                                                                                                                                                                                                                                                                                                                                                                                                                                     |
| Date Submitted by the Author: | 13-May-2020                                                                                                                                                                                                                                                                                                                                                                                                                                                                                                                                                                                                                                                                                                                                                                                                                                                                                                                                                                                                                                                                                                                                                                                                                                                                                                                                                                                                                                                                                                                                                                                                                                                                                                                                                                                                                                                                                                                                                                                                                                                                                                  |
| Complete List of Authors:     | <p>Nkurunungi, Gyaviira; Medical Research Council/Uganda Virus Research Institute and London School of Hygiene and Tropical Medicine (MRC/UVRI and LSHTM) Uganda Research Unit, Immunomodulation and Vaccines Programme</p> <p>Zirimenya , Ludoviko ; Medical Research Council/Uganda Virus Research Institute and London School of Hygiene and Tropical Medicine (MRC/UVRI and LSHTM) Uganda Research Unit, Immunomodulation and Vaccines Programme</p> <p>Nassuuna , Jacent; Medical Research Council/Uganda Virus Research Institute and London School of Hygiene and Tropical Medicine (MRC/UVRI and LSHTM) Uganda Research Unit, Immunomodulation and Vaccines Programme</p> <p>Natukunda , Agnes ; Medical Research Council/Uganda Virus Research Institute and London School of Hygiene and Tropical Medicine (MRC/UVRI and LSHTM) Uganda Research Unit, Immunomodulation and Vaccines Programme</p> <p>Kabuubi , Prossy ; Medical Research Council/Uganda Virus Research Institute and London School of Hygiene and Tropical Medicine (MRC/UVRI and LSHTM) Uganda Research Unit, Immunomodulation and Vaccines Programme</p> <p>Niwagaba , Emmanuel ; Medical Research Council/Uganda Virus Research Institute and London School of Hygiene and Tropical Medicine (MRC/UVRI and LSHTM) Uganda Research Unit, Immunomodulation and Vaccines Programme</p> <p>Oduru, Gloria; Medical Research Council/Uganda Virus Research Institute and London School of Hygiene and Tropical Medicine (MRC/UVRI and LSHTM) Uganda Research Unit, Immunomodulation and Vaccines Programme</p> <p>Kabami , Grace ; Medical Research Council/Uganda Virus Research Institute and London School of Hygiene and Tropical Medicine (MRC/UVRI and LSHTM) Uganda Research Unit, Immunomodulation and Vaccines Programme</p> <p>Amongin , Rebecca ; Medical Research Council/Uganda Virus Research Institute and London School of Hygiene and Tropical Medicine (MRC/UVRI and LSHTM) Uganda Research Unit, Immunomodulation and Vaccines Programme</p> <p>Mutebe , Alex ; Medical Research Council/Uganda Virus Research</p> |



|           |                                                                                                                                                                                                                                                                                                                                                                                                                                                                                                                                                                                                                                                                                                                                                                                                                                                                                                                                                                                                                                                                                                                                                                                                                                                                                                                                                                                                                                                                                                                                                                                                                                                                                                                                                                                                                                                                                                                                                                                                                                                                                                                                                                                                                                                                                                                                                                                                                                                                                                                                                                                                                                                                                                                                                                                                                                                                                                                                                                                                                             |
|-----------|-----------------------------------------------------------------------------------------------------------------------------------------------------------------------------------------------------------------------------------------------------------------------------------------------------------------------------------------------------------------------------------------------------------------------------------------------------------------------------------------------------------------------------------------------------------------------------------------------------------------------------------------------------------------------------------------------------------------------------------------------------------------------------------------------------------------------------------------------------------------------------------------------------------------------------------------------------------------------------------------------------------------------------------------------------------------------------------------------------------------------------------------------------------------------------------------------------------------------------------------------------------------------------------------------------------------------------------------------------------------------------------------------------------------------------------------------------------------------------------------------------------------------------------------------------------------------------------------------------------------------------------------------------------------------------------------------------------------------------------------------------------------------------------------------------------------------------------------------------------------------------------------------------------------------------------------------------------------------------------------------------------------------------------------------------------------------------------------------------------------------------------------------------------------------------------------------------------------------------------------------------------------------------------------------------------------------------------------------------------------------------------------------------------------------------------------------------------------------------------------------------------------------------------------------------------------------------------------------------------------------------------------------------------------------------------------------------------------------------------------------------------------------------------------------------------------------------------------------------------------------------------------------------------------------------------------------------------------------------------------------------------------------------|
|           | <p>Institute and London School of Hygiene and Tropical Medicine (MRC/UVRI and LSHTM) Uganda Research Unit, Immunomodulation and Vaccines Programme</p> <p>Namutebi , Milly ; Medical Research Council/Uganda Virus Research Institute and London School of Hygiene and Tropical Medicine (MRC/UVRI and LSHTM) Uganda Research Unit, Immunomodulation and Vaccines Programme</p> <p>Zziwa , Christopher ; Medical Research Council/Uganda Virus Research Institute and London School of Hygiene and Tropical Medicine (MRC/UVRI and LSHTM) Uganda Research Unit, Immunomodulation and Vaccines Programme</p> <p>Amongi, Susan; Medical Research Council/Uganda Virus Research Institute and London School of Hygiene and Tropical Medicine (MRC/UVRI and LSHTM) Uganda Research Unit, Immunomodulation and Vaccines Programme</p> <p>Ninsiima , Caroline ; Medical Research Council/Uganda Virus Research Institute and London School of Hygiene and Tropical Medicine (MRC/UVRI and LSHTM) Uganda Research Unit, Immunomodulation and Vaccines Programme</p> <p>Onen, Caroline; Medical Research Council/Uganda Virus Research Institute and London School of Hygiene and Tropical Medicine (MRC/UVRI and LSHTM) Uganda Research Unit, Immunomodulation and Vaccines Programme</p> <p>Akello , Florence ; Medical Research Council/Uganda Virus Research Institute and London School of Hygiene and Tropical Medicine (MRC/UVRI and LSHTM) Uganda Research Unit, Immunomodulation and Vaccines Programme</p> <p>Sewankambo, Moses; Medical Research Council/Uganda Virus Research Institute and London School of Hygiene and Tropical Medicine (MRC/UVRI and LSHTM) Uganda Research Unit, Immunomodulation and Vaccines Programme</p> <p>Kiwanuka, Samuel; Medical Research Council/Uganda Virus Research Institute and London School of Hygiene and Tropical Medicine (MRC/UVRI and LSHTM) Uganda Research Unit, Immunomodulation and Vaccines Programme</p> <p>Kizindo , Robert ; Medical Research Council/Uganda Virus Research Institute and London School of Hygiene and Tropical Medicine (MRC/UVRI and LSHTM) Uganda Research Unit, Immunomodulation and Vaccines Programme</p> <p>Kaweesa, James; Vector Control Division, Ministry of Health</p> <p>Cose , Stephen ; Medical Research Council/Uganda Virus Research Institute and London School of Hygiene and Tropical Medicine (MRC/UVRI and LSHTM) Uganda Research Unit, Immunomodulation and Vaccines Programme; London School of Hygiene and Tropical Medicine Department of Clinical Research</p> <p>Webb, Emily; London School of Hygiene and Tropical Medicine, MRC Tropical Epidemiology Group, Department of Infectious Disease Epidemiology</p> <p>Elliott, Alison ; Medical Research Council/Uganda Virus Research Institute and London School of Hygiene and Tropical Medicine (MRC/UVRI and LSHTM) Uganda Research Unit, Immunomodulation and Vaccines Programme; London School of Hygiene and Tropical Medicine Department of Clinical Research</p> |
| Keywords: | <p>Infection control &lt; INFECTIOUS DISEASES, PARASITOLOGY, Public health &lt; INFECTIOUS DISEASES, Immunology &lt; TROPICAL MEDICINE, Epidemiology &lt; TROPICAL MEDICINE, Paediatric infectious disease &amp; immunisation &lt; PAEDIATRICS</p>                                                                                                                                                                                                                                                                                                                                                                                                                                                                                                                                                                                                                                                                                                                                                                                                                                                                                                                                                                                                                                                                                                                                                                                                                                                                                                                                                                                                                                                                                                                                                                                                                                                                                                                                                                                                                                                                                                                                                                                                                                                                                                                                                                                                                                                                                                                                                                                                                                                                                                                                                                                                                                                                                                                                                                          |
|           |                                                                                                                                                                                                                                                                                                                                                                                                                                                                                                                                                                                                                                                                                                                                                                                                                                                                                                                                                                                                                                                                                                                                                                                                                                                                                                                                                                                                                                                                                                                                                                                                                                                                                                                                                                                                                                                                                                                                                                                                                                                                                                                                                                                                                                                                                                                                                                                                                                                                                                                                                                                                                                                                                                                                                                                                                                                                                                                                                                                                                             |

SCHOLARONE™  
Manuscripts

1  
2  
3  
4  
5  
6  
7  
8  
9  
10  
11  
12  
13  
14  
15  
16  
17  
18  
19  
20  
21  
22  
23  
24  
25  
26  
27  
28  
29  
30  
31  
32  
33  
34  
35  
36  
37  
38  
39  
40  
41  
42  
43  
44  
45  
46  
47  
48  
49  
50  
51  
52  
53  
54  
55  
56  
57  
58  
59  
60

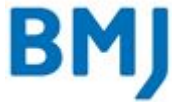

I, the Submitting Author has the right to grant and does grant on behalf of all authors of the Work (as defined in the below author licence), an exclusive licence and/or a non-exclusive licence for contributions from authors who are: i) UK Crown employees; ii) where BMJ has agreed a CC-BY licence shall apply, and/or iii) in accordance with the terms applicable for US Federal Government officers or employees acting as part of their official duties; on a worldwide, perpetual, irrevocable, royalty-free basis to BMJ Publishing Group Ltd ("BMJ") its licensees and where the relevant Journal is co-owned by BMJ to the co-owners of the Journal, to publish the Work in this journal and any other BMJ products and to exploit all rights, as set out in our [licence](#).

The Submitting Author accepts and understands that any supply made under these terms is made by BMJ to the Submitting Author unless you are acting as an employee on behalf of your employer or a postgraduate student of an affiliated institution which is paying any applicable article publishing charge ("APC") for Open Access articles. Where the Submitting Author wishes to make the Work available on an Open Access basis (and intends to pay the relevant APC), the terms of reuse of such Open Access shall be governed by a Creative Commons licence – details of these licences and which [Creative Commons](#) licence will apply to this Work are set out in our licence referred to above.

Other than as permitted in any relevant BMJ Author's Self Archiving Policies, I confirm this Work has not been accepted for publication elsewhere, is not being considered for publication elsewhere and does not duplicate material already published. I confirm all authors consent to publication of this Work and authorise the granting of this licence.

1  
2  
3 1 **The effect of intensive treatment for schistosomiasis on immune responses to vaccines among**  
4 **rural Ugandan island adolescents: randomised controlled trial protocol A for the ‘POPulation**  
5 **differences in VACCine responses’ (POPVAC) programme**  
6  
7

8  
9 4 Gyaviira Nkurunungi<sup>1,¶,\*</sup>, Ludoviko Zirimenya<sup>1,¶</sup>, Jacent Nassuuna<sup>1,¶</sup>, Agnes Natukunda<sup>1,¶</sup>, Prossy N  
10 Kabuubi<sup>1</sup>, Emmanuel Niwagaba<sup>1</sup>, Gloria Oduru<sup>1</sup>, Grace Kabami<sup>1</sup>, Rebecca Amongin<sup>1</sup>, Alex Mutebe<sup>1</sup>,  
11 Milly Namutebi<sup>1</sup>, Christopher Zziwa<sup>1</sup>, Susan Amongi<sup>1</sup>, Caroline Ninsiima<sup>1</sup>, Caroline Onen<sup>1</sup>, Florence  
12 Akello<sup>1</sup>, Moses Sewankambo<sup>1</sup>, Samuel Kiwanuka<sup>1</sup>, Robert Kizindo<sup>1</sup>, James Kaweesa<sup>2</sup>, Stephen Cose<sup>1,3</sup>,  
13 Emily L Webb<sup>4</sup>, Alison M Elliott<sup>1,3</sup> **for the POPVAC trial team**  
14  
15  
16  
17  
18  
19

20 10 <sup>1</sup>Immunomodulation and Vaccines Programme, Medical Research Council/Uganda Virus Research  
21 Institute and London School of Hygiene and Tropical Medicine (MRC/UVRI and LSHTM) Uganda  
22  
23 12 Research Unit, Entebbe, Uganda

24  
25 13 <sup>2</sup>Vector Control Division, Ministry of Health, Kampala, Uganda

26  
27 14 <sup>3</sup>Department of Clinical Research, London School of Hygiene and Tropical Medicine, London, United  
28 Kingdom  
29

30  
31 16 <sup>4</sup>MRC Tropical Epidemiology Group, Department of Infectious Disease Epidemiology, London School  
32 of Hygiene and Tropical Medicine, London, United Kingdom  
33

34  
35 18 <sup>¶</sup>These authors contributed equally

36  
37 19 **\*Correspondence:** Gyaviira Nkurunungi; [gyaviira.nkurunungi@lshtm.ac.uk](mailto:gyaviira.nkurunungi@lshtm.ac.uk)  
38  
39  
40  
41  
42  
43  
44  
45  
46  
47  
48  
49  
50  
51  
52  
53  
54  
55  
56  
57  
58  
59  
60

1  
2  
3 20 **Abstract**

4  
5 21 *Introduction*

6  
7 22 Several licensed and investigational vaccines have lower efficacy, and induce impaired immune  
8  
9 23 responses, in low-income versus high-income countries and in rural, versus urban, settings.  
10  
11 24 Understanding these population differences is essential to optimising vaccine effectiveness in the  
12  
13 25 tropics. We suggest that repeated exposure to and immunomodulation by chronic helminth  
14  
15 26 infections is crucial.

16 27 *Methods and analysis*

17  
18 28 We have designed an individually randomised, parallel group trial of intensive versus standard  
19  
20 29 praziquantel (PZQ) intervention against schistosomiasis, to determine effects on vaccine response  
21  
22 30 outcomes among school-going adolescents (9 to 17 years) from rural *Schistosoma mansoni* (*Sm*)-  
23  
24 31 endemic Ugandan islands. Vaccines to be studied comprise BCG on day 'zero'; yellow fever, oral  
25  
26 32 typhoid and Human Papilloma Virus (HPV) vaccines at week 4; and HPV and Tetanus/diphtheria  
27  
28 33 booster vaccine at week 28. The intensive arm will receive PZQ doses three times, each two weeks  
29  
30 34 apart, before BCG immunisation, followed by a dose at week 8 and quarterly thereafter. The  
31  
32 35 standard arm will receive PZQ at week 8 and week 52. We expect to enrol 480 participants, with 80%  
33  
34 36 *Sm* infected at the outset.

35  
36 37 Primary outcomes are BCG-specific IFN- $\gamma$  ELISpot responses eight weeks after BCG immunisation and  
37  
38 38 for other vaccines, antibody responses to key vaccine antigens at four weeks after immunisation.  
39  
40 39 Secondary analyses will determine effects of intensive anthelmintic treatment on correlates of  
41  
42 40 protective immunity, on vaccine response waning, on priming vs boosting immunisations, and on *Sm*  
43  
44 41 infection status and intensity. Exploratory immunology assays using archived samples will enable  
45  
46 42 assessment of mechanistic links between helminths and vaccine responses.

45 43 *Ethics and dissemination*

46  
47 44 Ethics approval has been obtained from relevant Ugandan and UK ethics committees. Results will be  
48  
49 45 shared with Uganda Ministry of Health, relevant district councils, community leaders and study  
50  
51 46 participants. Further dissemination will be done through conference proceedings and publications.

52 47 *Trial registration*

53  
54 48 Current Controlled Trials identifier: ISRCTN60517191.  
55  
56  
57 49  
58  
59  
60

1  
2  
3 50 **Article summary**  
4

5 51 *Strengths and limitations of this study*  
6

- 7 52
- 8 • This will be the first well-powered intervention study to investigate effects of schistosomiasis  
9 treatment on vaccine responses in adolescents.  
10
  - 11 54 • Effects on both live-attenuated and inert vaccines will be studied.  
12
  - 13 55 • Our strong immunoepidemiological design and nested immunological studies will address  
14 specific hypotheses regarding pathways of effects.  
15
  - 16 57 • The sample archives developed will provide a major asset for exploration of new leads arising  
17 from this hypothesis-driven work, or for an alternative, “systems biology” approach  
18 58 investigating (for example) transcriptome, microbiome and virome.  
19 59
  - 20 60 • Even with intensive anthelmintic intervention, it may be difficult to “successfully” treat  
21 *Schistosoma* infection in our endemic setting due to re-infections; however, we still expect a  
22 substantial difference in intensity between the two trial arms.  
23 61  
24 62  
25 63

26  
27  
28 64 **Word count**  
29

30 65 3066  
31

32 66 **Keywords**  
33

34 67 Vaccine; Schistosomiasis; Praziquantel; Immunization  
35  
36  
37  
38  
39  
40  
41  
42  
43  
44  
45  
46  
47  
48  
49  
50  
51  
52  
53  
54  
55  
56  
57  
58  
59  
60

## 68 Introduction

69 Vaccine-specific immune responses are often impaired, and vaccine efficacy lower, in tropical low-  
70 income countries (LICs) compared to temperate high-income countries and in rural, compared to  
71 urban, LIC settings.<sup>1-8</sup> This has been recognised for both live vaccines (such as BCG,<sup>2,3,5,9</sup> polio,<sup>1</sup> yellow  
72 fever<sup>4</sup> vaccines) and non-live vaccines (such as influenza<sup>10</sup> and tetanus<sup>11</sup>). Investigational malaria<sup>7</sup>  
73 and viral-vectored tuberculosis<sup>6</sup> and Ebola<sup>12</sup> vaccines are also affected. Previous exposure to the  
74 target pathogen (or related organisms) may mask the benefit of the vaccine.<sup>13,14</sup> However, pre-  
75 vaccination exposure does not explain UK-Senegal differences in Ebola trial vaccine-specific  
76 responses in healthy adults,<sup>12</sup> as the target organism is rare. Therefore, “environmental  
77 sensitisation” may play an important role.<sup>5</sup>

78 A long-held hypothesis is that parasites, particularly helminths, modulate vaccine responses through  
79 profound pre- and post-immunisation bystander effects on immunological activation and  
80 regulation.<sup>15-17</sup> Helminths might also impact vaccines responses through interactions with the  
81 complex ecosystem of mammalian gut bacteria, fungi, protozoa and viruses (the “trans-kingdom”  
82 concept<sup>18</sup> detailed elsewhere in this issue). Helminth-induced gut mucosa damage, the associated  
83 translocation of microbial products into the systemic circulation<sup>19-21</sup> and systemic immune activation  
84 or regulation mediated by microbial products might contribute to modulation of responses to  
85 vaccines and other infections.

86 Helminth-mediated modulation of vaccine responses has not been substantiated in human  
87 populations. No well-powered trials have been conducted to evaluate reversibility of their effects. In  
88 animal models, helminths generally impair priming and accelerate waning of vaccine responses,  
89 although effects vary with helminth species, vaccine type and the timing of infection and  
90 immunisation.<sup>22</sup> Most observational studies in humans also suggest suppressed or biased responses  
91 during helminth infection, especially during systemic infections, such as schistosomiasis and the  
92 filariases. There is modest evidence that treating geohelminths in humans improves responses to  
93 BCG<sup>23,24</sup> or oral cholera vaccine<sup>25</sup> and we found that schistosomiasis treatment improved the  
94 measles-booster response in pre-school children.<sup>26</sup> There is therefore a strong case for a  
95 comprehensive assessment of the effects of helminths and their treatment on vaccine responses.

96 The extent to which helminths and related “trans-kingdom” mediators causally and reversibly  
97 impact immunological characteristics associated with vaccine responses may best be determined by  
98 intervention studies. This trial protocol A of the ‘Population differences in Vaccine responses’  
99 programme (POPVAC A; Current Controlled Trials identifier: ISRCTN60517191) has been designed to  
100 evaluate the effect of *Schistosoma mansoni* and its treatment on vaccine responses. This study is

1  
2  
3 101 one of three parallel trials whose designs and cross-cutting analyses are described separately in this  
4  
5 102 issue.  
6  
7  
8  
9  
10  
11  
12  
13  
14  
15  
16  
17  
18  
19  
20  
21  
22  
23  
24  
25  
26  
27  
28  
29  
30  
31  
32  
33  
34  
35  
36  
37  
38  
39  
40  
41  
42  
43  
44  
45  
46  
47  
48  
49  
50  
51  
52  
53  
54  
55  
56  
57  
58  
59  
60

For peer review only



1  
2  
3 103 **Hypothesis**  
4

5 104 The overarching goal of the POPVAC programme is to understand population differences in vaccine  
6  
7 105 responses in Uganda, in order to identify strategies through which vaccine effectiveness can be  
8  
9 106 optimised for the low-income, tropical settings where they are especially needed. For this Trial A, we  
10  
11 107 focus on the hypothesis that *Schistosoma mansoni* infection suppresses responses to unrelated  
12  
13 108 vaccines; and that this effect can be reversed, at least in part, by intensive praziquantel treatment  
14  
15 109 intervention.

16 110 **Objective**

17  
18 111 To determine whether there are reversible effects of chronic *Schistosoma mansoni* infection on  
19  
20 112 vaccine response in adolescents, using an intervention study.  
21  
22  
23  
24  
25  
26  
27  
28  
29  
30  
31  
32  
33  
34  
35  
36  
37  
38  
39  
40  
41  
42  
43  
44  
45  
46  
47  
48  
49  
50  
51  
52  
53  
54  
55  
56  
57  
58  
59  
60

## 113 **Methods and analysis**

### 114 ***Setting and participants***

115 SPIRIT reporting guidelines<sup>27</sup> have been used. We will conduct an individually randomised, parallel  
116 group trial of intensive versus standard intervention against schistosomiasis (described below) in the  
117 *S. mansoni*-endemic Koome islands of Lake Victoria, Mukono district, Uganda.<sup>28</sup> We aim to enroll  
118 480 participants, randomising 240 to each intervention arm. The study cohort will recruit  
119 participants aged 9 to 17 years in primary school years 1 to 6. Adolescents<sup>29</sup> in this study setting  
120 bear a heavy parasite burden.<sup>30</sup> In addition, this age-group is a target group for vaccines against  
121 sexually transmitted infections (currently human papilloma virus [HPV] – in future, it is hoped, for  
122 vaccines against HIV) and for booster immunisations.

### 123 ***Recruitment criteria***

#### 124 *Inclusion criteria*

- 125 i. Attending the selected school and planning to continue to attend the school for the duration  
126 of the study
- 127 ii. Aged 9 to 17 years and enrolled in primary 1 to 6 (to avoid primary leaving examinations in  
128 late year 7, and loss to follow up of children leaving after primary 7)
- 129 iii. Written informed assent by participant and consent by parent or guardian
- 130 iv. Females agree to avoid pregnancy for the duration of the trial
- 131 v. Willing to provide locator information and to be contacted during the course of the trial
- 132 vi. Able and willing (in the investigator's opinion) to comply with all the study requirements

#### 133 *Exclusion criteria*

- 134 i. Clinically significant history of immunodeficiency (including HIV), cancer, cardiovascular  
135 disease, gastrointestinal disease, liver disease, renal disease, endocrine disorder and  
136 neurological illness
- 137 ii. History of serious psychiatric condition or disorder
- 138 iii. Moderate or severe acute illness characterised by any of the following symptoms: fever,  
139 impaired consciousness, convulsions, difficulty in breathing, vomiting; or as otherwise  
140 determined by the attending project clinician.
- 141 iv. Concurrent oral or systemic steroid medication or the concurrent use of other  
142 immunosuppressive agents within 2 months prior to enrolment
- 143 v. History of allergic reaction to immunisation or any allergy likely to be exacerbated by any  
144 component of the study vaccines including egg or chicken proteins

- 1  
2  
3 145 vi. History of previous immunisation with Yellow Fever (YF), oral typhoid or Human Papillomavirus  
4 146 (HPV) vaccine; previous immunisation with BCG or Tetanus and diphtheria vaccine (Td) at age  
5 147  $\geq 5$  years  
6  
7  
8 148 vii. Tendency to develop keloid scars  
9  
10 149 viii. Haemoglobin less than 82g/L  
11  
12 150 ix. Positive HIV serology  
13  
14 151 x. Positive pregnancy test  
15 152 xi. Female currently lactating, confirmed pregnancy or intention to become pregnant during the  
16 153 trial period  
17  
18 154 xii. Use of an investigational medicinal product or non-registered drug, live vaccine, or medical  
19 155 device other than the study vaccines for 30 days prior to dosing with the study vaccine, or  
20 156 planned use during the study period  
21  
22 157 xiii. Administration of immunoglobulins and/or any blood products within the three months  
23 158 preceding the planned trial immunisation date  
24  
25  
26

27 159 Further information on recruitment criteria can be found in Supplementary information.  
28

### 29 160 **Interventions**

30  
31 161 We will individually randomise participants to intensive or standard praziquantel (PZQ) treatment, in  
32 162 a 1:1 ratio. The intensive arm will receive three doses of PZQ (approximately 40mg/kg, assessed by  
33 163 height pole) each two weeks apart prior to the first immunisation (the last of these 2-3 weeks before  
34 164 immunisation), followed by PZQ at 8 weeks (after primary endpoint sampling) and thereafter quarterly  
35 165 PZQ (approximately; timings adjusted to accommodate school terms) during follow up. The standard  
36 166 arm will receive their first dose of PZQ at week 8 (after immunisation and after primary endpoint  
37 167 sampling) and a second dose at week 52 (to conform to Uganda Ministry of Health policy, which is  
38 168 annual treatment) (**Figure 1**). No placebo will be used in this trial because all participants will be  
39 169 treated (albeit at different frequencies) and participants are unlikely to seek additional treatments  
40 170 outside the trial schedule: praziquantel treatment is not popular because of the recognised (although  
41 171 temporary) adverse effects (described in Supplementary information).  
42  
43  
44  
45  
46  
47  
48  
49

### 50 172 **Randomisation and allocation to treatment arm**

51  
52 173 A randomisation code will be generated by an independent statistician using a randomly permuted  
53 174 block size. At enrolment, eligibility criteria will be checked and eligible participants will be allocated  
54 175 sequentially to the next randomisation number. The randomisation code will be kept securely by  
55 176 the trial statistician and made available only to those responsible for providing or preparing the trial  
56  
57  
58  
59  
60

177 interventions. A second copy will be held by a data manager or statistician not otherwise involved in  
178 the trial at the MRC/UVRI and LSHTM Uganda Research Unit.

179 Implementation will be done by a clinician using sequentially numbered opaque sealed envelopes. A  
180 set of envelopes will be prepared, labelled with the randomisation numbers and containing a card  
181 indicating the allocation (to intensive or standard treatment). After the next randomisation number  
182 in the sequence has been allocated, the envelope bearing that number will be opened to reveal the  
183 allocation.

#### 184 **Blinding**

185 Clinicians and participants will not be blinded to the treatment allocation since they will not  
186 participate in outcome ascertainment; only immunology laboratory staff who are assessing trial  
187 outcomes will be blinded.

#### 188 **Immunisations**

189 We will study a portfolio of licensed vaccines (live and inert, oral and parental, priming and boosting)  
190 expected to be beneficial (in some cases, already given) to adolescents in Uganda. Our schedule  
191 (**Table 1**, supplementary **Table S1**) will comprise three main immunisation days (week 0, week 4 and  
192 week 28). Additional HPV immunisation will be provided for girls aged 14 years or above, and a  
193 second Tetanus/diphtheria boost will be given after completion of the study, to accord with the  
194 national Expanded Programme on Immunisation (EPI) routines, but the response to these will not  
195 specifically be assessed. Further rationale for the selection of vaccines is detailed in the  
196 Supplementary information.

197

**Table 1. Immunisation schedule**

|                                                                                                                                                                                                                                                                                                                                                                                                                                                                                 | Immunisation week 0                           | Immunisation week 4                           | [Immunisation week 8]                                   | Immunisation week 28                         | [Immunisation week 52]                        |
|---------------------------------------------------------------------------------------------------------------------------------------------------------------------------------------------------------------------------------------------------------------------------------------------------------------------------------------------------------------------------------------------------------------------------------------------------------------------------------|-----------------------------------------------|-----------------------------------------------|---------------------------------------------------------|----------------------------------------------|-----------------------------------------------|
| <b>Live vaccines</b>                                                                                                                                                                                                                                                                                                                                                                                                                                                            | BCG vaccination / re-vaccination <sup>1</sup> | Yellow fever (YF-17D)<br>Oral typhoid (Ty21a) |                                                         |                                              |                                               |
| <b>Non-live vaccines</b>                                                                                                                                                                                                                                                                                                                                                                                                                                                        |                                               | HPV prime                                     | HPV boost for girls aged $\geq 14$ years <sup>2,3</sup> | HPV boost and Tetanus/ diphtheria (Td) boost | Tetanus/ diphtheria (Td) boost <sup>3,4</sup> |
| 1. Prior BCG status may vary (data on history and documentation of prior BCG, and presence of a BCG scar, will be documented although these approaches have limitations for determining BCG status)<br>2. The National EPI programme recommends three doses of HPV vaccine for older girls<br>3. These doses will be given to comply with guidelines but outcomes specifically relating to these doses will not be assessed<br>4. Priming by immunisation in infancy is assumed |                                               |                                               |                                                         |                                              |                                               |

198

**Schedule of immunisation and sampling**

The schedule of immunisation and sampling is outlined in **Figure 1** and **Table S1**. While optimal timings for outcome measures vary between vaccines, sampling at 8 weeks post BCG and 4 weeks post YF-17D, Ty21a, HPV and Td is proposed for the primary endpoints, targeting the establishment of memory responses and approximate peak of antibody responses. A secondary endpoint at one year will assess waning. All analyses will take baseline measurements into account. Immunisation postponement criteria are detailed in Supplementary information.

**Outcomes***Primary outcomes*

These will be assessed in all participants.

- i. **BCG:** BCG-specific IFN- $\gamma$  ELISpot response eight weeks post BCG immunisation.
- ii. **YF-17D:** neutralising antibody titres (plaque-reduction neutralisation test) at four weeks post YF immunisation.
- iii. **Ty21a:** *Salmonella typhi* lipopolysaccharide (LPS)-specific immunoglobulin (Ig)G concentration at four weeks post Ty21a immunisation.
- iv. **HPV:** IgG specific for L1-proteins of HPV-16/18 at four weeks post HPV priming immunisation.
- v. **Td:** Tetanus and diphtheria toxoid-specific IgG concentration at four weeks post Td immunisation.

*Secondary outcomes*

These will be assessed in all participants and will further investigate estimates of protective immunity (for vaccines where these are available) and dynamics of the vaccine responses, as well as the impact of the interventions on parasite clearance.

- i. **Protective immunity.** Proportions with protective neutralising antibody (YF); protective IgG levels (TT);<sup>31</sup> seroconversion rates (Ty21a) at four weeks post the corresponding immunisation.
- ii. **Response waning.** Primary outcome measures (all vaccines) repeated at week 52, and area-under-the curve (AUC) analyses. Parasitic infection may accelerate,<sup>32</sup> and anti-parasitic interventions delay, waning.
- iii. **Priming versus boosting.** Effects on priming versus boosting will be examined for HPV only, comparing outcomes four weeks after the first, and four weeks after the second vaccine dose.

1  
2  
3 229 iv. **Current *S. mansoni* infection status and intensity** will be determined by serum/plasma levels  
4 230 of circulating anodic antigen (CAA). The method is quantitative, highly specific for *Schistosoma*  
5 231 infection, and much more sensitive than the conventional Kato Katz method.<sup>33</sup> CAA will be  
6 232 assessed retrospectively on stored samples collected at baseline, on immunisation days, and  
7 233 on primary and secondary endpoint days.

11 234 Furthermore, our sample collection will offer opportunities for an array of exploratory  
12 235 immunological evaluations on stored samples, focusing mainly on vaccine antigen specific outcomes.  
13 236 Exploratory assays will provide further detail on the role of immunological profiles and trans-  
14 237 kingdom effects in mediating helminth modulation of vaccine-specific responses.

#### 19 238 *Additional evaluation of parasite infection exposure*

- 21 239 i. **Prior exposure to schistosomiasis** will be evaluated by ELISA for IgG to schistosome egg  
22 240 antigen using stored blood samples collected at baseline.
- 23 241 ii. **The presence of other helminth infections** will be determined retrospectively using stool  
24 242 PCR of samples collected at baseline and at weeks 28 and 52.<sup>30</sup> In accordance with national  
25 243 guidelines, all participants will be treated with albendazole or mebendazole after collection  
26 244 of samples for primary endpoints at week 8 and 28, and after collection of samples for  
27 245 secondary endpoints at week 52.
- 28 246 iii. **Current malaria infection status and intensity** will be assessed retrospectively by PCR on  
29 247 stored samples collected on immunisation days and at week 52. Individuals presenting with  
30 248 fever will be investigated using rapid diagnostic tests for malaria and treated based on the  
31 249 results and according to prevailing national guidelines.
- 32 250 iv. **Prior malaria exposure** will be evaluated by ELISA for IgG to malaria antigen using stored  
33 251 samples collected at baseline.

#### 34 252 *Sample size considerations*

35 253 Based on the literature<sup>4 34 35</sup> and preliminary data, we anticipate that standard deviations (SDs) of  
36 254 primary outcome measures will lie between 0.3 and 0.6 log<sub>10</sub>, and that effective treatment may  
37 255 increase responses by approximately 0.2 log<sub>10</sub> (based on Tweyongyere *et al.*<sup>26</sup>). We have therefore  
38 256 powered our study to detect differences of this magnitude (0.2 log<sub>10</sub>) or (in some cases) smaller. We  
39 257 assume *S. mansoni* prevalence of  $\geq 80\%$ .

40 258 Based on these assumptions, we plan to include 480 participants in total (240 quarterly PZQ, 240  
41 259 annual PZQ); of whom 384 are expected to be *S. mansoni* infected, giving 192 participants in each  
42 260 trial arm who are infected at baseline.

261 **Table 2** shows power estimates, for 5% significance level and assuming 20% loss to follow-up.

262

**Table 2. Power estimates (5% significance level)**

| Standard deviation ( $\log_{10}$ )                                       | Log <sub>10</sub> difference |      |      |      |      |      |      |
|--------------------------------------------------------------------------|------------------------------|------|------|------|------|------|------|
|                                                                          | 0.08                         | 0.10 | 0.12 | 0.14 | 0.16 | 0.18 | 0.20 |
| 192 intensive PZQ vs 192 standard PZQ ( <i>S. mansoni</i> infected only) |                              |      |      |      |      |      |      |
| 0.3                                                                      | 65%                          | 83%  | 94%  | 98%  | >99% | >99% | >99% |
| 0.4                                                                      | 42%                          | 59%  | 75%  | 87%  | 94%  | 98%  | 99%  |
| 0.5                                                                      | 29%                          | 42%  | 56%  | 69%  | 80%  | 88%  | 94%  |
| 0.6                                                                      | 21%                          | 31%  | 42%  | 53%  | 65%  | 75%  | 83%  |

Cells highlighted in grey correspond to >80% power.

263

### 264 ***Ethical and regulatory considerations***

265 Ethical approval has been granted from the Research Ethics Committee of the Uganda Virus  
 266 Research Institute (UVRI REC, reference: GC/127/19/05/664) and the London School of Hygiene and  
 267 Tropical Medicine (LSHTM, reference: 16032), and from the Uganda National Council for Science and  
 268 Technology (UNCST, reference: HS2486) and the Uganda National Drug Authority (NDA, reference:  
 269 CTA0093). Any protocol amendments will be submitted to ethics committees and regulatory bodies  
 270 for approval before implementation.

271 Participants are adolescents and therefore a vulnerable human population. Care will be taken to  
 272 provide adequate, age and education-status appropriate information and to ensure that it is  
 273 understood; and to emphasise that participation is voluntary. Participants will be enrolled only when  
 274 they have given their own assent and when consent has been given by the parent or guardian. No  
 275 major risks to the participants are anticipated since all the treatments and vaccines to be given are  
 276 licensed and known to be safe. The main risk to participants will be time lost from school work: we  
 277 will work with teachers and parents to minimise disruption to classes, and will avoid enrolment of  
 278 primary 7 students since these classes are involved in national examinations. Further risks are  
 279 discussed in Supplementary information.

### 280 ***Patient and public involvement***

281 Concepts involved in this work have been discussed with colleagues at the Vector Control Division  
 282 and Expanded Programme on Immunisation in the Ministry of Health (Uganda), with the Mukono  
 283 District Council and with community leaders and Village Health Teams from Koome subcounty. We  
 284 also have held meetings to explain the proposed work to teachers, parents, participants and village  
 285 members, and to address their questions about issues such as study length, the study's ethical

1  
2  
3 286 approval status, if boys would also receive the HPV vaccine, and why adults were excluded from the  
4  
5 287 study. Study findings will be shared with these stakeholders and with participants.  
6

7 288 ***Dissemination***

8  
9 289 Study findings will be published through open access peer-reviewed journals, presentations at local,  
10  
11 290 national and international conferences and to the local community through community meetings.  
12  
13 291 Anonymised participant level datasets generated will be available upon request.  
14

15 292 ***Data management and analysis***

16 293 Socio-demographic information and clinical and laboratory measurements will be recorded and  
17  
18 294 managed using Research Electronic Data Capture (REDCap) tools,<sup>36 37</sup> with paper-based forms as  
19  
20 295 back-up. All data will be recorded under a unique study ID number. When paper forms must be  
21  
22 296 used, data will be double entered in a study-specific database, with standard checks for  
23  
24 297 discrepancies. All data for analysis will be anonymised and stored on a secure and password-  
25  
26 298 protected server, with access limited to essential research personnel.

27 299 The effect of intensive (compared to standard) praziquantel treatment on the outcomes will be  
28  
29 300 analysed. Information on infection status will only be available after randomisation. The primary  
30  
31 301 analysis will be done on individuals identified as infected at baseline (through randomisation, these  
32  
33 302 will be balanced between treatment arms); this will test the hypothesis that treating the infection  
34  
35 303 (and subsequent reinfections) removes the parasite's effects. Secondary analyses will include all  
36  
37 304 randomised individuals; this will provide insight into the potential benefit of the interventions as  
38  
39 305 public health measures.  
40  
41  
42  
43  
44  
45  
46  
47  
48  
49  
50  
51  
52  
53  
54  
55  
56  
57  
58  
59  
60



## 306 Discussion

307 This will be the first well-powered intervention study to investigate the effect of schistosomiasis  
308 treatment on vaccine responses in adolescents. This study will determine whether *S. mansoni*  
309 infection has a causal, reversible, impact on the response to live or inert vaccines, including effects  
310 on vaccine replication, immune response profile, priming, boosting and waning. The results will add  
311 to understanding of population differences in vaccine responses and on interventions that may  
312 enhance responses. If treating helminths improves vaccine responses in adolescents, combined  
313 parasite-control/immunisation programmes offer an attractive, practical public health intervention  
314 for schools and communities.

315 There are risks associated with our approach to addressing the trial objective. **First**, there is a risk of  
316 failure to clear *S. mansoni* infections, and repeated reinfection during the trial. This issue can be  
317 challenging because of incomplete cure or maturation of immature worms after treatment, and  
318 lifestyles in endemic communities that result in repeated exposure. To mitigate this, we will  
319 administer three PZQ treatments over a six-week period before the first immunisations, and  
320 continuing quarterly treatment in the intensive arm. **Second**, there is a risk that *S. mansoni* infection  
321 has long-term effects, not removed by treatment, mediated, for example, by epigenetic change.<sup>38</sup>  
322 However, studies show that parasite treatment results in immunological changes,<sup>39,40</sup> and our data  
323 suggest at least partial recovery of the measles vaccine response among young children treated for  
324 schistosomiasis.<sup>26</sup> By initiating intervention six to eight weeks before the first immunisations, and  
325 providing repeated intervention in the intensive arms, we hope to achieve significant resolution of *S.*  
326 *mansoni* effects.

327 We are interested in the effects of removing *S. mansoni*. Treating parasites can induce acute  
328 immunological change due to release of previously hidden antigens. To minimise such effects,  
329 immunisations will be given at least 2 weeks after PZQ (the longest practicable interval; **Figure 1**).

330 Laboratory analyses will also highlight immune parameters and cellular populations that link  
331 environmental exposures to vaccine responses. Identifying processes associated with poor or good  
332 outcomes will inform strategies in vaccine design (for example, the genetic modification of vaccines,  
333 or innovative use of adjuvants, to counter any adverse immunological milieu, currently an area of  
334 intense research for cancer vaccines<sup>41</sup>); ultimately supporting the development of effective vaccines  
335 tailored to the low-income settings that most need them.

336

## 337 Study timeline

1  
2  
3 338 Applications for ethical approval were submitted in May 2018, with approval received in September  
4  
5 339 2018 (Uganda Virus Research Institute Research Ethics Committee), May 2019 (National Drug  
6  
7 340 Authority and Uganda National Council for Science and Technology), June 2019 (London School of  
8  
9 341 Hygiene and Tropical Medicine). Collaborator/investigator/trial steering committee meetings were  
10  
11 342 also held during the initial 12-month planning period. The study began recruitment in July 2019.  
12  
13 343 Intervention will be up to 12 months, with completion of the project scheduled for September 2020.  
14

15 344

#### 16 345 **Competing interests**

17  
18 346 Alison Elliott reports a grant from the Medical research Council, UK (POPVAC programme funding).  
19  
20 347 The rest of the authors declare that they have no conflicts of interest.

#### 21 22 348 **Author contributions**

23  
24 349 AME conceived the study. AME, GN, ELW, AN, JN, SC, LZ and JK contributed to study design. LZ, GO,  
25  
26 350 PNK, EN, GK, RA, CN, CO, MN, SA and FA are site clinicians/nurses/clinical laboratory technicians  
27  
28 351 providing valuable input on clinical considerations of the intervention. MS, SK and RK are field  
29  
30 352 workers handling the organisational integration of the intervention. AN, AM and ELW are involved in  
31  
32 353 organisation of the databases, trial randomization, treatment allocation and drawing up of analytical  
33  
34 354 plans. GN, LZ, JN, AN, SC, ELW and AME drafted the manuscript. All authors reviewed the  
35  
36 355 manuscript, contributed to it and approved the final version.

#### 37 356 **Acknowledgements**

38  
39 357 We thank the Uganda National Expanded Programme for Immunisation, Sanofi Pasteur and PaxVax  
40  
41 358 for providing the HPV, yellow fever and oral typhoid vaccines, respectively. The BCG and tetanus-  
42  
43 359 diphtheria vaccines were kind donations from the Serum Institute of India. We thank the Vector  
44  
45 360 Control Division of the Ministry of Health and the Mukono district local government for their  
46  
47 361 support. We also thank members of the POPVAC programme steering committee (chaired by Prof.  
48  
49 362 Richard Hayes) and the Data and Safety Monitoring Board (Dr David Meya, Prof Andrew Prendergast  
363 and Dr Elizabeth George).

#### 50 51 364 **Funding**

52  
53 365 The POPVAC programme of work is supported by the Medical Research Council of the United  
54  
55 366 Kingdom (grant number MR/R02118X/1). SC and JN are supported in part by the Makerere  
56  
57 367 University – Uganda Virus Research Institute Centre of Excellence for Infection and Immunity  
58  
59 368 Research and Training (MUII-plus). MUII-plus is funded under the DELTAS Africa Initiative. The  
369  
60 369 DELTAS Africa Initiative is an independent funding scheme of the African Academy of Sciences (AAS),

1  
2  
3 370 Alliance for Accelerating Excellence in Science in Africa (AESAs) and supported by the New  
4 371 Partnership for Africa's Development Planning and Coordinating Agency (NEPAD Agency) with  
5 372 funding from the Wellcome Trust (grant 107743) and the UK Government. The MRC/UVRI and  
6 373 LSHTM Uganda Research Unit is jointly funded by the UK Medical Research Council (MRC) and the  
7 374 UK Department for International Development (DFID) under the MRC/DFID Concordat agreement  
8 375 and is also part of the EDCTP2 programme supported by the European Union.

9  
10 376 The study sponsor (London School of Hygiene and Tropical Medicine) and funders had no role in  
11 377 study design; collection, management, analysis, and interpretation of data; writing of the protocol;  
12 378 and the decision to submit the protocol for publication.

13  
14  
15  
16  
17  
18  
19 379 **POPVAC trial team**

20  
21 380 **Principal investigator:** Alison Elliott; **Project leader:** Ludoviko Zirimenya; **laboratory staff:** Gyaviira  
22 381 Nkurunungi, Stephen Cose, Rebecca Amongin, Beatrice Nassanga, Jacent Nassuuna, Irene Nambuya,  
23 382 Prossy Kabuubi, Emmanuel Niwagaba, Gloria Oduru, Grace Kabami; **statisticians and data**  
24 383 **managers:** Emily Webb, Agnes Natukunda, Helen Akurut, Alex Mutebe; **clinicians:** Anne Wajja, Milly  
25 384 Namutebi, Christopher Zziwa, Joel Serubanja; **nurses:** Caroline Onen, Esther Nakazibwe, Josephine  
26 385 Tumusiime, Caroline Ninsiima, Susan Amongi, Florence Akello; **internal monitor:** Mirriam  
27 386 Akello; **field workers:** Robert Kizindo, Moses Sewankambo, Denis Nsubuga, Samuel Kiwanuka, Fred  
28 387 Kiwudhu; **boatman:** David Abiriga; **administrative management:** Moses Kizza, Samsi Nansukusa;  
29 388 **internal and external collaborators:** Pontiano Kaleebu, Hermelijn Smits, Maria Yazdanbakhsh,  
30 389 Govert van Dam, Paul Corstjens, Sarah Staedke, Henry Luzze, James Kaweesa, Edridah Tukahebwa,  
31 390 Elly Tumushabe, Moses Muwanga  
32  
33  
34  
35  
36  
37  
38  
39  
40  
41  
42  
43  
44  
45  
46  
47  
48  
49  
50  
51  
52  
53  
54  
55  
56  
57  
58  
59  
60

391 **References**

- 392 1. Taniuchi M, Platts-Mills JA, Begum S, et al. Impact of enterovirus and other enteric pathogens on oral polio  
393 and rotavirus vaccine performance in Bangladeshi infants. *Vaccine* 2016;34(27):3068-75. doi:  
394 10.1016/j.vaccine.2016.04.080 [published Online First: 2016/05/08]
- 395 2. Fine PE. Variation in protection by BCG: implications of and for heterologous immunity. *Lancet*  
396 1995;346(8986):1339-45.
- 397 3. Black GF, Weir RE, Floyd S, et al. BCG-induced increase in interferon-gamma response to mycobacterial  
398 antigens and efficacy of BCG vaccination in Malawi and the UK: two randomised controlled studies. *Lancet*  
399 2002;359(9315):1393-401. doi: 10.1016/S0140-6736(02)08353-8
- 400 4. Muyanja E, Ssemaganda A, Ngauv P, et al. Immune activation alters cellular and humoral responses to  
401 yellow fever 17D vaccine. *The Journal of clinical investigation* 2014;124(7):3147-58. doi: 10.1172/jci75429  
402 [published Online First: 2014/06/10]
- 403 5. Barreto ML, Pilger D, Pereira SM, et al. Causes of variation in BCG vaccine efficacy: examining evidence from  
404 the BCG REVAC cluster randomized trial to explore the masking and the blocking hypotheses. *Vaccine*  
405 2014;32(30):3759-64. doi: 10.1016/j.vaccine.2014.05.042
- 406 6. Tanner R, Kakalacheva K, Miller E, et al. Serum indoleamine 2,3-dioxygenase activity is associated with  
407 reduced immunogenicity following vaccination with MVA85A. *BMC infectious diseases* 2014;14:660. doi:  
408 10.1186/s12879-014-0660-7 [published Online First: 2014/12/04]
- 409 7. Sissoko MS, Healy SA, Katile A, et al. Safety and efficacy of PfSPZ Vaccine against Plasmodium falciparum via  
410 direct venous inoculation in healthy malaria-exposed adults in Mali: a randomised, double-blind phase 1 trial.  
411 *The Lancet Infectious diseases* 2017;17(5):498-509. doi: 10.1016/s1473-3099(17)30104-4 [published Online  
412 First: 2017/02/22]
- 413 8. Venkatraman N, Ndiaye BP, Bowyer G, et al. Safety and Immunogenicity of a Heterologous Prime-Boost  
414 Ebola Virus Vaccine Regimen in Healthy Adults in the United Kingdom and Senegal. *The Journal of infectious*  
415 *diseases* 2018;219(8):1187-97. doi: 10.1093/infdis/jiy639
- 416 9. Barreto ML, Pereira SM, Pilger D, et al. Evidence of an effect of BCG revaccination on incidence of  
417 tuberculosis in school-aged children in Brazil: second report of the BCG-REVAC cluster-randomised trial.  
418 *Vaccine* 2011;29(31):4875-7. doi: 10.1016/j.vaccine.2011.05.023
- 419 10. van Riet E, Adegnik AA, Retra K, et al. Cellular and humoral responses to influenza in gabonese children  
420 living in rural and semi-urban areas. *The Journal of infectious diseases* 2007;196(11):1671-8. doi:  
421 10.1086/522010 [published Online First: 2007/11/17]
- 422 11. van Riet E, Retra K, Adegnik AA, et al. Cellular and humoral responses to tetanus vaccination in Gabonese  
423 children. *Vaccine* 2008;26(29-30):3690-5. doi: 10.1016/j.vaccine.2008.04.067 [published Online First:  
424 2008/06/10]
- 425 12. Venkatraman N, Ndiaye BP, Bowyer G, et al. Safety and Immunogenicity of a Heterologous Prime-Boost  
426 Ebola Virus Vaccine Regimen in Healthy Adults in the United Kingdom and Senegal. *The Journal of infectious*  
427 *diseases* 2019;219(8):1187-97. doi: 10.1093/infdis/jiy639
- 428 13. Brandt L, Feino Cunha J, Weinreich Olsen A, et al. Failure of the Mycobacterium bovis BCG vaccine: some  
429 species of environmental mycobacteria block multiplication of BCG and induction of protective immunity to  
430 tuberculosis. *Infection and immunity* 2002;70(2):672-8. [published Online First: 2002/01/18]
- 431 14. Flaherty DK, Vesosky B, Beamer GL, et al. Exposure to Mycobacterium avium can modulate established  
432 immunity against Mycobacterium tuberculosis infection generated by Mycobacterium bovis BCG vaccination.

- 1  
2  
3 433 *Journal of leukocyte biology* 2006;80(6):1262-71. doi: 10.1189/jlb.0606407 [published Online First:  
4 434 2006/09/14]  
5  
6 435 15. Maizels RM, McSorley HJ. Regulation of the host immune system by helminth parasites. *The Journal of*  
7 436 *allergy and clinical immunology* 2016;138(3):666-75. doi: 10.1016/j.jaci.2016.07.007 [published Online First:  
8 437 2016/08/02]  
9  
10 438 16. Wammes LJ, Mpairwe H, Elliott AM, et al. Helminth therapy or elimination: epidemiological,  
11 439 immunological, and clinical considerations. *The Lancet Infectious diseases* 2014;14(11):1150-62. doi:  
12 440 10.1016/S1473-3099(14)70771-6  
13  
14 441 17. Wammes LJ, Hamid F, Wiria AE, et al. Regulatory T cells in human geohelminth infection suppress immune  
15 442 responses to BCG and *Plasmodium falciparum*. *Eur J Immunol* 2010;40(2):437-42. doi: 10.1002/eji.200939699  
16  
17 443 18. Pfeiffer JK, Virgin HW. Viral immunity. Transkingdom control of viral infection and immunity in the  
18 444 mammalian intestine. *Science* 2016;351(6270) doi: 10.1126/science.aad5872  
19  
20 445 19. Onguru D, Liang Y, Griffith Q, et al. Human schistosomiasis is associated with endotoxemia and Toll-like  
21 446 receptor 2- and 4-bearing B cells. *The American journal of tropical medicine and hygiene* 2011;84(2):321-4.  
22 447 doi: 10.4269/ajtmh.2011.10-0397 [published Online First: 2011/02/05]  
23  
24 448 20. George PJ, Anuradha R, Kumar NP, et al. Evidence of microbial translocation associated with perturbations  
25 449 in T cell and antigen-presenting cell homeostasis in hookworm infections. *PLoS neglected tropical diseases*  
26 450 2012;6(10):e1830. doi: 10.1371/journal.pntd.0001830 [published Online First: 2012/10/12]  
27  
28 451 21. Rajamanickam A, Munisankar S, Bhootra Y, et al. Microbial Translocation Associated with an Acute-Phase  
29 452 Response and Elevations in MMP-1, HO-1, and Proinflammatory Cytokines in *Strongyloides stercoralis*  
30 453 Infection. *Infection and immunity* 2017;85(1) doi: 10.1128/iai.00772-16 [published Online First: 2016/11/09]  
31  
32 454 22. Sanya RE, Nkurunungi G, Andia Biraro I, et al. A life without worms. *Transactions of the Royal Society of*  
33 455 *Tropical Medicine and Hygiene* 2017:1-9. doi: 10.1093/trstmh/trx010 [published Online First: 2017/03/25]  
34  
35 456 23. Elias D, Britton S, Aseffa A, et al. Poor immunogenicity of BCG in helminth infected population is associated  
36 457 with increased in vitro TGF-beta production. *Vaccine* 2008;26(31):3897-902. doi: S0264-410X(08)00540-9  
37 458 [pii]  
38 459 10.1016/j.vaccine.2008.04.083 [published Online First: 2008/06/17]  
39  
40 460 24. Elias D, Wolday D, Akuffo H, et al. Effect of deworming on human T cell responses to mycobacterial  
41 461 antigens in helminth-exposed individuals before and after bacille Calmette-Guerin (BCG) vaccination. *Clin Exp*  
42 462 *Immunol* 2001;123(2):219-25.  
43  
44 463 25. Cooper PJ, Chico ME, Losonsky G, et al. Albendazole treatment of children with ascariasis enhances the  
45 464 vibriocidal antibody response to the live attenuated oral cholera vaccine CVD 103-HgR. *The Journal of*  
46 465 *infectious diseases* 2000;182(4):1199-206. doi: 10.1086/315837 [published Online First: 2000/09/09]  
47  
48 466 26. Tweyongyere R, Nassanga BR, Muhwezi A, et al. Effect of *Schistosoma mansoni* infection and its treatment  
49 467 on antibody responses to measles catch-up immunisation in pre-school children: A randomised trial. *PLoS*  
50 468 *neglected tropical diseases* 2019;13(2):e0007157. doi: 10.1371/journal.pntd.0007157 [published Online First:  
51 469 2019/02/15]  
52  
53 470 27. Chan AW, Tetzlaff JM, Altman DG, et al. SPIRIT 2013 statement: defining standard protocol items for  
54 471 clinical trials. *Ann Intern Med* 2013;158(3):200-7. doi: 10.7326/0003-4819-158-3-201302050-00583  
55 472 [published Online First: 2013/01/09]  
56  
57 473 28. Sanya RE, Nkurunungi G, Hoek Spaans R, et al. The Impact of Intensive Versus Standard Anthelmintic  
58 474 Treatment on Allergy-related Outcomes, Helminth Infection Intensity, and Helminth-related Morbidity in  
59  
60

- 1  
2  
3 475 Lake Victoria Fishing Communities, Uganda: Results From the LaVIISWA Cluster-randomized Trial. *Clinical*  
4 476 *Infectious Diseases* 2018;ciy761-ciy61. doi: 10.1093/cid/ciy761  
5  
6 477 29. WHO. Adolescent Health Research Priorities: Report of a Technical Consultation 2015.  
7 478 [http://apps.who.int/iris/bitstream/10665/203564/1/WHO\\_FWC\\_MCA\\_15\\_07\\_eng.pdf?ua=1](http://apps.who.int/iris/bitstream/10665/203564/1/WHO_FWC_MCA_15_07_eng.pdf?ua=1) (accessed 17th  
8 479 May 2019).  
9  
10 480 30. Webb EL, Nampijja M, Kaweesa J, et al. Helminths are positively associated with atopy and wheeze in  
11 481 Ugandan fishing communities: results from a cross-sectional survey. *Allergy* 2016 doi: 10.1111/all.12867  
12  
13 482 31. Plotkin SA. Correlates of protection induced by vaccination. *Clinical and vaccine immunology : CVI*  
14 483 2010;17(7):1055-65. doi: 10.1128/cvi.00131-10 [published Online First: 2010/05/14]  
15  
16 484 32. Riner DK, Ndombi EM, Carter JM, et al. Schistosoma mansoni Infection Can Jeopardize the Duration of  
17 485 Protective Levels of Antibody Responses to Immunizations against Hepatitis B and Tetanus Toxoid. *PLoS*  
18 486 *neglected tropical diseases* 2016;10(12):e0005180. doi: 10.1371/journal.pntd.0005180  
19  
20 487 33. Corstjens PL, Nyakundi RK, de Dood CJ, et al. Improved sensitivity of the urine CAA lateral-flow assay for  
21 488 diagnosing active Schistosoma infections by using larger sample volumes. *Parasites & vectors* 2015;8:241.  
22 489 doi: 10.1186/s13071-015-0857-7 [published Online First: 2015/04/22]  
23  
24 490 34. Fletcher HA, Snowden MA, Landry B, et al. T-cell activation is an immune correlate of risk in BCG vaccinated  
25 491 infants. *Nat Commun* 2016;7:11290. doi: 10.1038/ncomms11290  
26  
27 492 35. Safaeian M, Porras C, Pan Y, et al. Durable antibody responses following one dose of the bivalent human  
28 493 papillomavirus L1 virus-like particle vaccine in the Costa Rica Vaccine Trial. *Cancer prevention research*  
29 494 *(Philadelphia, Pa)* 2013;6(11):1242-50. doi: 10.1158/1940-6207.capr-13-0203 [published Online First:  
30 495 2013/11/06]  
31  
32 496 36. Harris PA, Taylor R, Minor BL, et al. The REDCap Consortium: Building an International Community of  
33 497 Software Platform Partners. *Journal of biomedical informatics* 2019;103208. doi: 10.1016/j.jbi.2019.103208  
34 498 [published Online First: 2019/05/13]  
35  
36 499 37. Harris PA, Taylor R, Thielke R, et al. Research electronic data capture (REDCap)--a metadata-driven  
37 500 methodology and workflow process for providing translational research informatics support. *Journal of*  
38 501 *biomedical informatics* 2009;42(2):377-81. doi: 10.1016/j.jbi.2008.08.010 [published Online First:  
39 502 2008/10/22]  
40  
41 503 38. Blok BA, Arts RJ, van Crevel R, et al. Trained innate immunity as underlying mechanism for the long-term,  
42 504 nonspecific effects of vaccines. *J Leukoc Biol* 2015;98(3):347-56. doi: 10.1189/jlb.5RI0315-096R  
43  
44 505 39. Watanabe K, Mwinzi PN, Black CL, et al. T regulatory cell levels decrease in people infected with  
45 506 Schistosoma mansoni on effective treatment. *The American journal of tropical medicine and hygiene*  
46 507 2007;77(4):676-82. [published Online First: 2007/11/06]  
47  
48 508 40. Schmiedel Y, Mombo-Ngoma G, Labuda LA, et al. CD4+CD25hiFOXP3+ Regulatory T Cells and Cytokine  
49 509 Responses in Human Schistosomiasis before and after Treatment with Praziquantel. *PLoS neglected tropical*  
50 510 *diseases* 2015;9(8):e0003995. doi: 10.1371/journal.pntd.0003995 [published Online First: 2015/08/21]  
51  
52 511 41. Seledtsov VI, Goncharov AG, Seledtsova GV. Clinically feasible approaches to potentiating cancer cell-based  
53 512 immunotherapies. *Human vaccines & immunotherapeutics* 2015;11(4):851-69. doi:  
54 513 10.1080/21645515.2015.1009814 [published Online First: 2015/05/02]  
55 514  
56  
57  
58 515  
59  
60



1  
2  
3 516 **FIGURE LEGENDS**  
4  
5

6 517 **Figure 1. Outline of immunisations and anthelmintic intervention**  
7

8 518 <sup>1</sup>Primary endpoints will be at eight weeks post BCG and four weeks post Yellow fever (YF-17D), oral  
9 519 typhoid (Ty21a), Human Papilloma Virus (HPV) and Tetanus/diphtheria (Td) vaccination.

10  
11 520 <sup>2</sup>Primary endpoint for responses to Td given at 28 weeks.  
12

13 521  
14  
15  
16  
17  
18  
19  
20  
21  
22  
23  
24  
25  
26  
27  
28  
29  
30  
31  
32  
33  
34  
35  
36  
37  
38  
39  
40  
41  
42  
43  
44  
45  
46  
47  
48  
49  
50  
51  
52  
53  
54  
55  
56  
57  
58  
59  
60

For peer review only

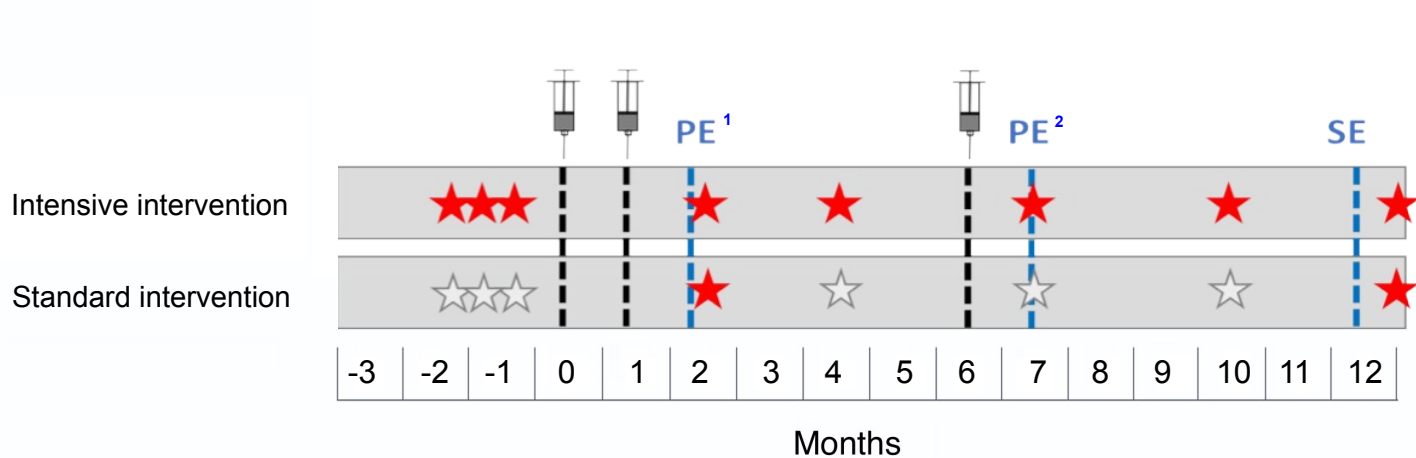

★ praziquantel;  - - - immunisations; PE - - - primary endpoint; SE - - - secondary endpoint

☆ standard arm, no praziquantel

For peer review only - <http://bmjopen.bmj.com/site/about/guidelines.xhtml>



1  
2  
3 1 [SUPPLEMENTARY INFORMATION](#)  
4  
5  
6 2

7 3 **The effect of intensive treatment for schistosomiasis on immune responses to vaccines among**  
8 **rural Ugandan island adolescents: randomised controlled trial protocol A for the ‘POPulation**  
9 **differences in VACCine responses’ (POPVAC) programme**  
10  
11

12 6 Gyaviira Nkurunungi<sup>1,†,\*</sup>, Ludoviko Zirimenya<sup>1,†</sup>, Jacent Nassuuna<sup>1,†</sup>, Agnes Natukunda<sup>1,†</sup>, Prossy N  
13 7 Kabuubi<sup>1</sup>, Emmanuel Niwagaba<sup>1</sup>, Gloria Oduru<sup>1</sup>, Grace Kabami<sup>1</sup>, Rebecca Amongin<sup>1</sup>, Alex Mutebe<sup>1</sup>,  
14 8 Milly Namutebi<sup>1</sup>, Christopher Zziwa<sup>1</sup>, Susan Amongi<sup>1</sup>, Caroline Ninsiima<sup>1</sup>, Caroline Onen<sup>1</sup>, Florence  
15 9 Akello<sup>1</sup>, Moses Sewankambo<sup>1</sup>, Samuel Kiwanuka<sup>1</sup>, Robert Kizindo<sup>1</sup>, James Kaweesa<sup>2</sup>, Stephen Cose<sup>1,3</sup>,  
16 10 Emily L Webb<sup>4</sup>, Alison M Elliott<sup>1,3</sup> for the POPVAC trial team  
17  
18  
19  
20  
21  
22  
23

24 12 <sup>1</sup>Immunomodulation and Vaccines Programme, Medical Research Council/Uganda Virus Research  
25 13 Institute and London School of Hygiene and Tropical Medicine (MRC/UVRI and LSHTM) Uganda  
26 14 Research Unit, Entebbe, Uganda  
27  
28

29 15 <sup>2</sup>Vector Control Division, Ministry of Health, Kampala, Uganda  
30  
31

32 16 <sup>3</sup>Department of Clinical Research, London School of Hygiene and Tropical Medicine, London, United  
33 17 Kingdom  
34

35 18 <sup>4</sup>MRC Tropical Epidemiology Group, Department of Infectious Disease Epidemiology, London School  
36 19 of Hygiene and Tropical Medicine, London, United Kingdom  
37  
38

39 20 <sup>†</sup>These authors contributed equally  
40  
41

42 21 **\*Correspondence:** Gyaviira Nkurunungi; [gyaviira.nkurunungi@lshtm.ac.uk](mailto:gyaviira.nkurunungi@lshtm.ac.uk)  
43  
44  
45  
46  
47  
48  
49  
50  
51  
52  
53  
54  
55  
56  
57  
58  
59  
60

**Table S1. Schedule of visits and procedures**

| VISIT NUMBER                                                                                                                                  | 1               | 2 & 3                     | 4             | 5 <sup>9</sup> | 5.2             | 6                                    | 7       | 8             | 9                                       | 10      | 11                |
|-----------------------------------------------------------------------------------------------------------------------------------------------|-----------------|---------------------------|---------------|----------------|-----------------|--------------------------------------|---------|---------------|-----------------------------------------|---------|-------------------|
| WEEKS FROM 1 <sup>ST</sup> IMMUNISATION                                                                                                       | -8 <sup>1</sup> | -6 <sup>10</sup> , -4, -2 | 0             | 4              | 4 weeks +4 days | 8                                    | 20      | 28            | 32                                      | 44      | 52                |
|                                                                                                                                               | Screening       | Treatment (Rx) only       | Immunisations | Immunisations  |                 | Primary Endpoint (PE), Immunisations | Rx only | Immunisations | PE/Secondary Endpoint (SE) <sup>2</sup> | Rx only | SE, Immunisations |
| <b>RANDOMISED INTENSIVE VS STANDARD PRAZIQUANTEL INTERVENTION</b>                                                                             |                 |                           |               |                |                 |                                      |         |               |                                         |         |                   |
| PZQ intensive arm (x)                                                                                                                         |                 | x                         |               |                |                 | x <sup>3</sup>                       | x       |               | x <sup>3</sup>                          | x       | x <sup>3</sup>    |
| PZQ standard arm                                                                                                                              |                 |                           |               |                |                 | x <sup>3</sup>                       |         |               |                                         |         | x <sup>3</sup>    |
| Albendazole                                                                                                                                   |                 |                           |               |                |                 | x <sup>3</sup>                       |         |               | x <sup>3</sup>                          |         | x <sup>3</sup>    |
| <b>VACCINES</b>                                                                                                                               |                 |                           |               |                |                 |                                      |         |               |                                         |         |                   |
| BCG                                                                                                                                           |                 |                           | x             |                |                 |                                      |         |               |                                         |         |                   |
| YF-17D                                                                                                                                        |                 |                           |               | x              |                 |                                      |         |               |                                         |         |                   |
| Ty21a                                                                                                                                         |                 |                           |               | x              |                 |                                      |         |               |                                         |         |                   |
| HPV                                                                                                                                           |                 |                           |               | x              |                 | [x] <sup>4</sup>                     |         | x             |                                         |         |                   |
| Td                                                                                                                                            |                 |                           |               |                |                 |                                      |         | x             |                                         |         | [x] <sup>5</sup>  |
| <b>INVESTIGATIONS/PROCEDURES</b>                                                                                                              |                 |                           |               |                |                 |                                      |         |               |                                         |         |                   |
| Inclusion/exclusion criteria                                                                                                                  | x               |                           |               |                |                 |                                      |         |               |                                         |         |                   |
| Informed consent                                                                                                                              | x               |                           |               |                |                 |                                      |         |               |                                         |         |                   |
| Questionnaire                                                                                                                                 | x               |                           | x             | x              | x               | x                                    |         | x             | x                                       |         | x                 |
| Examination                                                                                                                                   | x               |                           | (x)           | (x)            | (x)             | (x)                                  |         | (x)           | (x)                                     |         | (x)               |
| Urine β-HCG test (female only) 1mL                                                                                                            | x               |                           | x             | x              |                 |                                      |         | x             |                                         |         |                   |
| Urine YF viral load                                                                                                                           |                 |                           |               |                | x               |                                      |         |               |                                         |         |                   |
| Stool for PCR and storage                                                                                                                     | x               |                           |               |                |                 |                                      |         | x             |                                         |         | x                 |
| Stool for coproantibody and storage                                                                                                           | x               |                           |               |                |                 | x                                    |         |               |                                         |         |                   |
| <b>BLOOD SAMPLES</b>                                                                                                                          |                 |                           |               |                |                 |                                      |         |               |                                         |         |                   |
| Malaria PCR (1ml)                                                                                                                             |                 |                           | x             | x              |                 |                                      |         | x             |                                         |         | x                 |
| Serology for HIV, prior malaria and <i>S. mansoni</i> (0.5ml)                                                                                 | x               |                           |               |                |                 |                                      |         |               |                                         |         |                   |
| Mansonella perstans (1ml)                                                                                                                     | x               |                           |               |                |                 |                                      |         |               |                                         |         |                   |
| Serum/plasma CAA (1ml)                                                                                                                        | x               |                           | x             | x              |                 | x                                    |         | x             | x                                       |         | x                 |
| Hb <sup>8</sup> / Full blood count (0.5ml)                                                                                                    | x               |                           | x             | x              |                 |                                      |         | x             |                                         |         |                   |
| Assessments of pre-immunisation responses, and/or vaccine response outcomes and/or exploratory immunology; storage <sup>7</sup> (10 – 20 mls) |                 |                           | x             | x              |                 | x                                    |         | x             | x                                       |         | x                 |
| Blood for gene expression (2mls)                                                                                                              |                 |                           | x             | x              |                 |                                      |         | x             |                                         |         |                   |
| Blood vol (mL)                                                                                                                                | 4               |                           | 27            | 17             |                 | 10-20                                |         | 27            | 10                                      |         | 14                |
| Cumulative blood vol (mL) <sup>7</sup>                                                                                                        | 4               |                           | 31            | 48             |                 | 68                                   |         | 95            | 105                                     |         | 119               |

1  
2  
3  
4  
5  
6  
7  
8  
9  
10  
11  
12  
13  
14  
15  
16  
17  
18  
19  
20  
21  
22  
23  
24  
25  
26  
27  
28  
29  
30  
31  
32  
33  
34  
35  
36  
37  
38  
39  
40  
41  
42  
43  
44  
45  
46

**PE:** primary endpoint; **SE:** secondary endpoint; **Rx only:** treatment only  
 Immunisation days highlighted in green, primary end point days in red, days for treatment only in grey  
 (x) performed if clinically indicated

1. Screening and enrolment into Project A will take place about 8 weeks before immunisation 0 to allow initiation of the praziquantel intervention.
2. Week 32 is primary endpoint for responses to Td given at 28 weeks; secondary endpoint for HPV booster
3. Treatments given after sampling when schedules coincide
4. Week 8 HPV dose will be given for previously-unvaccinated girls aged  $\geq 14$  years
5. Week 52 Td booster dose will be provided as a service
6. Exploratory immunology blood volume will be guided by guidelines from Harvard Mass General, where a maximum of 3ml/kg body weight is taken at any one time point and not more than 3ml/kg is taken over any 8-week period (ref [http://www.drgreene.com/21\\_1616.html](http://www.drgreene.com/21_1616.html).) These guidelines have been followed in a previous study vaccinating adolescents with investigational tuberculosis vaccine MVA85A (in Uganda).<sup>1</sup> The total blood volume planned is 68 ml over the initial intensive sampling period of 8 weeks. Revision of sample volumes based on weight will only be required for participants who weigh less than 22 kg; the average weight of children aged 9 years is expected to be 28kg (with 21kg the 3rd centile) with greater weights for older children.<sup>2</sup>
7. At baseline, it will only be Hb estimation by Haemocue
8. Oral typhoid vaccine doses will be administered on three alternate days namely visit 5, 5.1 and 5.2.
9. The first PZQ treatment at week -6 will be administered at the end of the screening visit

### 23 **Further information on recruitment criteria**

- 24 • Participants who are excluded from the trial because they have been discovered (during  
25 screening procedures) to be suffering from a previously undiagnosed condition thought to  
26 require further medical attention will be referred appropriately for further investigation and  
27 treatment.
- 28 • Participants discovered to have severe anaemia will be excluded from the trial and treated  
29 for anaemia
- 30 • Participants discovered to be HIV-positive will be counselled and offered a CD4 T-cell count  
31 and referred to a provider of antiretroviral treatment (“Test and Treat” – i.e. initiation of  
32 treatment regardless of CD4 count is recommended for these high-risk communities).
- 33 • Participants discovered to be pregnant will be counselled and referred to an antenatal clinic  
34 of their choice.

35 This trial proposes to recruit all participants within a short time-frame. It will not, therefore, be  
36 possible to reconsider enrolment of potential participants with temporary exclusion criteria after  
37 treatment and resolution of the condition.

### 38 **Further rationale for the selection of vaccines**

#### 39 *Bacillus Calmette–Guérin (BCG)*

40 BCG is a live, replicating parenteral vaccine, and the only licensed vaccine against TB. The BCG  
41 vaccine for these studies will be obtained from the Serum Institute of India either directly, or  
42 through a supplier in Uganda. The Serum Institute of India provides much of the BCG vaccine used  
43 in Uganda.

44 Worldwide, TB is among the top 10 causes of death; Uganda has an estimated incidence of  
45 202/100,000 people.<sup>3</sup> Infectious, sputum positive, pulmonary TB classically emerges in adolescence,  
46 driving the on-going epidemic.<sup>4</sup> Thus adolescent booster immunisation is a key TB control strategy.<sup>5</sup>  
47 However, BCG vaccine response and efficacy are often impaired in tropical and rural settings<sup>6-8</sup> and  
48 new TB vaccines are similarly affected.<sup>9</sup> In the past, the WHO has been hesitant to recommend BCG  
49 re-vaccination. However, in 2017 WHO’s Strategic Advisory Group of Experts (SAGE) recommended:  
50 “Further research is warranted to explore whether certain sub-groups of age, geographic or *M.*  
51 *tuberculosis* exposure categories would benefit from re-vaccination.”<sup>10</sup> Recent results suggest that,  
52 despite the variability of BCG efficacy between populations, BCG vaccination in adolescence offers  
53 benefit in some tropical settings, especially for individuals who are not yet infected with  
54 *Mycobacterium tuberculosis*, and may also be cost-effective.<sup>7,11</sup> Also, BCG vaccine is currently being  
55 used among adolescents in South Africa as a comparator in a trial of a novel TB vaccine (trial

1  
2  
3 56 registration NCT02075203). BCG efficacy in Ugandan adolescents, and differences in BCG vaccine  
4  
5 57 responses between urban and rural Ugandan populations, have not been tested. Information  
6  
7 58 obtained from this study is expected to further inform the use of BCG in adolescents, and also to  
8  
9 59 inform the development of new vaccines for tuberculosis.

#### 10 60 *Yellow fever vaccine*

11  
12 61 Yellow fever vaccine YF-17D is a live replicating parenteral vaccine. The vaccine (Stamaril; Sanofi  
13  
14 62 Pasteur) is available for purchase in Uganda. Yellow Fever (YF) causes outbreaks in Uganda and the  
15  
16 63 wider region<sup>12</sup> and YF-17D is a candidate for Uganda's expanded programme on immunisation (EPI).  
17  
18 64 Lower vaccine replication, lower neutralising antibody induction, and greater waning, are described  
19  
20 65 in Uganda compared to Switzerland.<sup>13</sup> YF-17D is a potential vector for novel vaccine constructs,<sup>14</sup>  
21  
22 66 adding relevance to vaccine development.

#### 23 67 *Typhoid vaccine Ty21a*

24  
25 68 Typhoid vaccine Ty21a is a live replicating oral vaccine and also a potential vector for new vaccine  
26  
27 69 constructs.<sup>15</sup> The Ty21a vaccine will be purchased from PaxVax, Redwood City, California.  
28  
29 70 Substantial, multi-year typhoid outbreaks occur in Uganda and immunisation campaigns have been  
30  
31 71 advocated as cost effective.<sup>16</sup> Schistosomiasis has been associated with prolonged *S. typhi* infection<sup>17</sup>  
32  
33 72 and impaired antibody responses to killed typhoid vaccines.<sup>18</sup>

34  
35 73 Ty21a was developed in the 1970s. Although not routinely used in Uganda, it has been (and is  
36  
37 74 currently) registered in many countries. It was first registered in the United States and United  
38  
39 75 Kingdom in the 1980s, and is recommended by the WHO for both endemic and epidemic settings.<sup>19</sup>  
40  
41 76 It has comparable efficacy to the parenteral Vi polysaccharide typhoid vaccine, good durability and  
42  
43 77 minimal adverse effects.<sup>19</sup> It is proposed for use in this study to model effects of study exposures  
44  
45 78 and intervention on the response to a live oral vaccine.

46  
47 79 The Ty21a vaccine is given as a three-dose regimen on alternate days.

#### 48 80 *Human Papilloma Virus (HPV) vaccine*

49  
50 81 The Human Papilloma Virus (HPV) vaccine is a protein virus-like particle. The quadrivalent HPV  
51  
52 82 Vaccine Gardasil (Merck) is available for purchase in Uganda and is the vaccine used by the national  
53  
54 83 EPI programme. Studies after three vaccine doses have found somewhat enhanced responses in the  
55  
56 84 presence of malaria, but no effect of helminths.<sup>20</sup> No study has previously investigated parasite  
57  
58 85 effects on the priming response, but recent results for tetanus suggest that priming may be more  
59  
60 86 susceptible than boosting to adverse effects.<sup>21</sup> This will be important if forthcoming trials support  
87  
88 89 single-dose HPV immunisation (NCT02834637). HPV immunisation is being rolled out among girls to

1  
2  
3 88 prevent cervical neoplasia, the most common cancer among Ugandan women and we will  
4  
5 89 coordinate provision with the national HPV immunisation programme.<sup>22</sup> HPV immunisation is also  
6  
7 90 beneficial for boys since HPV infection is associated with anogenital warts, anal cancer and  
8  
9 91 oropharyngeal cancers in both males and females, and with penile cancer in men,<sup>23</sup> and we will  
10  
11 92 include boys in these studies.

### 12 93 *Tetanus and diphtheria vaccines*

14 94 Tetanus and diphtheria (Td) vaccines comprise inert toxoids. Schistosomiasis is associated with a Th2  
15  
16 95 biased response to tetanus toxoid<sup>24</sup> and with suppressed antibody responses among those with low  
17  
18 96 pre-immunisation antibody levels.<sup>21</sup> Booster immunisation is recommended for young women to  
19  
20 97 prevent maternal and neonatal tetanus. Recent evidence emphasises the need to protect young  
21  
22 98 men also.<sup>25</sup>

### 23 99 ***Immunisation Postponement Criteria***

25 100 If any one of the following is identified at the time scheduled for immunisation, the participant may  
26  
27 101 be immunised at a later date, or withdrawn, at the discretion of the Investigator. The participant  
28  
29 102 must be followed until resolution of the event as with any adverse event:

- 31 103 • Acute disease at the time of immunisation. Acute disease is defined as the presence of a  
32  
33 104 moderate or severe illness with or without fever. All vaccines can be administered to persons  
34  
35 105 with a minor illness such as diarrhoea or mild upper respiratory infection with or without low-  
36  
37 106 grade fever, i.e. temperature of  $\leq 37.5^{\circ}\text{C}$  ( $99.5^{\circ}\text{F}$ )
- 38 107 • Temperature of  $>37.5^{\circ}\text{C}$  ( $99.5^{\circ}\text{F}$ ) at the time of immunisation
- 40 108 • Taking antibiotics or antimalarials currently, or within the past 7 days, of the date of Ty21a  
41  
42 109 administration (ascertained verbally)

### 44 110 ***Vaccine storage and transport***

46 111 In order to maintain a reliable vaccine cold chain, the vaccines and diluents to be used will be stored  
47  
48 112 and transported within the recommended temperature range of  $+2^{\circ}\text{C}$  to  $+8^{\circ}\text{C}$ . Care will be taken to  
49  
50 113 ensure that the vaccines are not frozen. BCG, being sensitive to light, will be kept in the dark  
51  
52 114 (normally within its secondary packaging) for as long as possible to protect it during storage and  
53  
54 115 transportation. All vaccines will be kept in appropriate refrigeration equipment with a temperature  
55  
56 116 monitoring device to ensure temperatures remain between  $+2^{\circ}\text{C}$  and  $+8^{\circ}\text{C}$ . Cold boxes/vaccines  
57  
58 117 carriers with temperature monitors will be used to transport vaccines and the diluents from the  
59  
60 118 MRC/UVRI and LSHTM Uganda Research Unit (Entebbe) to Koome island and while transporting  
60 119 vaccines to immunisation sessions. Designated staff will be given responsibility for managing the

1  
2  
3 120 vaccine cold chain. All cold chain equipment including the temperature monitoring devices used for  
4  
5 121 this project will comply with relevant technical specifications as defined by the EPI standards. Basic  
6  
7 122 routine maintenance will be regularly carried out on all cold chain equipment.

### 8 9 123 ***Additional laboratory measurements***

10  
11 124 Additional assays will comprise HIV serology, pregnancy testing and full blood counts. HIV testing  
12  
13 125 and pregnancy testing will be accompanied by appropriate counselling by trained staff.

- 14  
15 126 • HIV serology will be done on blood samples using rapid tests and according to prevailing  
16  
17 127 national algorithms.<sup>26</sup> This will be done at baseline.
- 18  
19 128 • Pregnancy testing will be done using urine samples and standard operating procedures for  
20  
21 129 assessment of urine  $\beta$ -human chorionic gonadotropin ( $\beta$ hCG). This will be done at baseline  
22  
23 130 and before immunisation on each immunisation day.
- 24  
25 131 • Full blood counts will be conducted using a haematology analyser. Mild, moderate and  
26  
27 132 severe anaemia will be defined according to WHO guidelines, by age.<sup>27</sup> This will be done at  
28  
29 133 baseline to test for anaemia as part of the eligibility assessment, and pre-immunisation as  
30  
31 134 part of the assessment of immunological profile.

32  
33 135 Individuals found to be HIV positive or pregnant will be referred to appropriate providers for further  
34  
35 136 care. Individuals with severe anaemia (haemoglobin <82g/L) will be excluded from the randomised  
36  
37 137 intervention (since the intervention might be beneficial in management of anaemia). They will be  
38  
39 138 treated for anaemia.

### 40 41 139 ***Sample handling and archive***

42  
43 140 Blood and other samples will be processed according to local laboratory standard operating  
44  
45 141 procedures (SOPs). All samples will reach the laboratory in anonymised form.

46  
47 142 A sample archive will be developed. Although our current programme of work will address specific  
48  
49 143 hypotheses regarding pathways of effects of parasites and interventions, the sample archive will  
50  
51 144 provide a major asset for exploration of new leads arising from this work, or for an alternative,  
52  
53 145 “systems biology” approach employing (for example) proteomic, genomic, epigenetic and  
54  
55 146 transcriptomic analyses, and investigating the microbiome and virome. Information provided to  
56  
57 147 participants, and consent forms, will include considerations of sample storage, and the possibility of  
58  
59 148 sample analysis in laboratories within and outside Uganda. Participants will be able to decide if they  
60  
149 will permit such future use of any leftover samples. We plan to store the samples for up to 20 years.  
150  
151 If further storage is needed after that time, permission will be requested from the Uganda Virus  
Research Institute and London School of Hygiene and Tropical Medicine ethical review committees.

1  
2  
3 152 If they elect not to permit this, all of those leftover samples will be discarded after the completion of  
4  
5 153 the work included in the current protocol.

6  
7 154 ***Operational considerations***

8  
9 155 *Programme governance*

10  
11 156 A Programme Steering Committee has been set up to guide progress across all projects. This  
12  
13 157 comprises the following:

- 14  
15 158 • An independent chair  
16  
17 159 • Representatives from the Ministry of Health programmes for immunisation and for vector  
18  
19 160 borne disease control  
20  
21 161 • Representatives of district authorities (Mukono and Jinja districts)  
22  
23 162 • Community representatives  
24  
25 163 • Principal investigator and co-investigators  
26  
27 164 • Project leader and post-doctoral immunologist  
28  
29 165 • Trial statistician  
30  
31 166 • Laboratory manager  
32  
33 167 • Medical Research Council observer

34  
35 168 *Informed consent*

36  
37 169 Both written informed assent from the participants and written informed consent from a parent or  
38  
39 170 guardian will be required for participation, although these may not necessarily be obtained at the  
40  
41 171 same time. Information will be provided in both English and the appropriate local language. For  
42  
43 172 individuals who cannot speak the languages used, or who cannot read or write, a witness who can  
44  
45 173 read the information sheet and translate the information to the participant or parent/guardian will  
46  
47 174 be used. Two different types of age specific assent forms will be used for the group of participants  
48  
49 175 aged 9 – 12 years and for the group aged 13 – 17 years. Informed consent by emancipated or  
50  
51 176 mature minors will be obtained using a designated consent form for these categories of participants.

52  
53 177 The aims of the study, all tests, treatments and immunisations to be carried out and potential risks  
54  
55 178 will be explained. The participant will be given the opportunity to ask about details of the trial, and  
56  
57 179 will then have time to consider whether or not to participate. If they do decide to participate, they  
58  
59 180 and their parent/guardian will sign and date two copies of the assent and consent forms, one for  
60  
181 them to take away and keep, and one to be stored securely by the research team. Separate  
182 information and consent forms will be provided (i) for consent for storage of samples for future



183 studies and for anonymous sharing of data from this study and (ii) for possible genetic studies; the  
184 information sheet will explain that these data may be used in analyses related to this protocol.

#### 185 *Screening and Eligibility Assessment*

186 Once the informed consent process has been completed, and consent (and assent) given, a baseline  
187 medical history (including concomitant medication) will be collected. Vital signs will be checked and  
188 a physical examination will be performed. Inclusion and exclusion criteria will be checked.

189 Participants will undergo pre- and post-test counselling for HIV and (for girls) pregnancy testing by a  
190 trained and experienced nurse- or clinician-counsellor. Blood, urine and stool samples will be  
191 obtained, for tests as specified in the schedule of procedures. These tests are to exclude the major,  
192 immunomodulating co-infection, HIV, and conditions that might impact safety (anaemia,  
193 pregnancy).

#### 194 *Enrolment*

195 Participants who consent/assent, complete the screening processes, satisfy all the inclusion criteria  
196 and meet none of the exclusion criteria will be enrolled.

#### 197 *Discontinuation/withdrawal criteria*

198 In accordance with the principles of the current revision of the Declaration of Helsinki and any other  
199 applicable regulations, a participant has the right to withdraw from the study at any time and for any  
200 reason, and is not obliged to give his or her reasons for doing so. The Investigator may withdraw the  
201 participant at any time in the interests of the participant's health and well-being. In addition, the  
202 participant may withdraw/be withdrawn for any of the following reasons:

- 203 • Ineligibility (either arising during the study or retrospectively, having been overlooked at  
204 screening)
- 205 • Administrative decision by the Investigator
- 206 • Significant protocol deviation
- 207 • Participant non-compliance with study requirements
- 208 • An adverse event which requires discontinuation of the study involvement or results in  
209 inability to continue to comply with study procedures.

210 Any participant who becomes pregnant during the trial will be followed up until the end of the  
211 pregnancy but no further immunisations will be given unless indicated during pregnancy (as is the  
212 case for tetanus toxoid). The trial allocation for this participant will be unblinded and the participant  
213 will only be given further treatment if clinically indicated. The babies will also be followed up and

1  
2  
3 214 examined for any adverse effects. We will not routinely perform venepuncture in a pregnant  
4  
5 215 participant.

6  
7 216 The reason for withdrawal will be recorded in the case report form (CRF). If withdrawal is due to an  
8  
9 217 AE, appropriate follow-up visits or medical care will be arranged, with the agreement of the  
10  
11 218 participant, until the AE has resolved, stabilised or a non-trial related causality has been assigned.

12  
13 219 If a participant withdraws from the study samples collected before their withdrawal from the trial  
14  
15 220 will be used/ stored unless the participant specifically requests otherwise.

#### 16 221 *Trial discontinuation*

17  
18 222 The trial will be discontinued in the event of new scientific information that renders continuation  
19  
20 223 futile or unethical, or for any other reason, at the discretion of the Programme Steering Committee.

#### 21 224 *End of study definition*

22  
23 225 The trial will be completed when the last participant enrolled into the trial has completed their final  
24  
25 226 follow up visit.

#### 26 227 *Safety assessments and oversight*

27  
28 228 No new investigational drug or product will be used in the proposed trial. However, standard  
29  
30 229 approaches for monitoring safety and reporting of serious adverse events will be followed.

#### 31 230 *Monitoring*

32  
33 231 The trial will be monitored by both internal and external monitors according to a pre-defined  
34  
35 232 monitoring plan which will include a site initiation visit, monitoring visits at least annually, and a  
36  
37 233 close-out visit. The monitors will assess patient safety, data integrity, and adherence to the protocol  
38  
39 234 and to Good Clinical Research Practice procedures.

#### 40 235 ***Considerations regarding standard of care***

41  
42 236 *S. mansoni* infection status will be determined retrospectively through assays conducted in bulk on  
43  
44 237 stored samples (plasma CAA). These results will not, therefore, be useful to determine management  
45  
46 238 of individual participants.

47  
48 239 Participants in the standard treatment arm will receive lower levels of anthelmintic treatment.  
49  
50 240 However, all trial arms will receive a minimum of well-implemented national standard of care.

51  
52 241 Standard of care will comprise annual praziquantel treatment. Our own results from the Lake  
53  
54 242 Victoria Island Intervention Study on Worms and Allergy-related diseases (LaVIISWA),<sup>28</sup> which  
55  
56 243 compared annual versus quarterly intervention for schistosomiasis at community level over three  
57  
58  
59  
60

1  
2  
3 244 years, showed no advantage of quarterly treatment for morbidity outcomes attributed to  
4  
5 245 schistosomiasis.  
6  
7 246 Schistosomiasis can cause anaemia. To manage the expected differential benefits of the  
8  
9 247 interventions for anaemia, a full blood count will be performed at baseline, as discussed above;  
10  
11 248 anaemic children will be managed appropriately and severely anaemic children excluded.  
12  
13 249 Albendazole will be provided twice a year to manage nematode infections (after collection of  
14  
15 250 primary and secondary endpoint samples).

16 251 ***Procedures to be followed in the event of abnormal findings***

17  
18 252 Abnormal clinical findings from medical history, examination or blood tests will be assessed as to  
19  
20 253 their clinical significance throughout the trials. If an abnormal test result is deemed clinically  
21  
22 254 significant, it may be repeated. If a test remains clinically significant, the participant will be informed  
23  
24 255 and appropriate medical care arranged as appropriate and with the permission of the participant.  
25  
26 256 Specific details regarding findings, discussion with participants and resulting actions will be recorded  
27  
28 257 in the clinical records. Decisions to exclude the participant from enrolling in the trial or to withdraw  
29  
30 258 a participant from the trial will be at the discretion of the Investigator.

31 259 ***Data and Safety Monitoring Board (DSMB)***

32  
33 260 A data and safety monitoring board (DSMB) has been appointed to provide real-time safety  
34  
35 261 oversight. The DSMB will be notified within 7 days of the Investigators' being aware of the  
36  
37 262 occurrence of SAEs. The DSMB may recommend the Investigators to place the trial on hold if  
38  
39 263 deemed necessary following an intervention-related SAE. The DSMB will be chaired by a clinician  
40  
41 264 experienced in clinical trials. There will be a minimum of two other appropriately qualified  
42  
43 265 committee members. In the case of events related to a blinded intervention, the DSMB can request  
44  
45 266 unblinding. Membership will include a statistician, and at least one Ugandan member. All  
46  
47 267 correspondence between Investigators and the DSMB will be conveyed by the Principal Investigator  
48  
49 268 to the trial Sponsor. The Chair of the DSMB will be contacted for advice and independent review by  
50  
51 269 the Investigator or trial Sponsor in the following situations:

- 50 270
- 51 271 • The occurrence of any SAE
  - 52 272 • Any other situation where the Investigator or trial Sponsor feels independent advice or  
53 273 review is important

54  
55 273 ***Ethical and regulatory considerations***

56  
57 274 *Further information regarding risks*

1  
2  
3 275 The immunisations to be given have recognised side effects which are usually mild and resolve  
4  
5 276 spontaneously in a few days to one week. Parenteral vaccines are likely to result in pain and  
6  
7 277 swelling at the site of injection and mild fever; very occasionally pain and swelling can be severe and  
8  
9 278 associated with difficulty in moving the shoulder. Sometimes headache and tiredness occur. Rarely  
10  
11 279 a vaccine may cause a severe allergic reaction. For most vaccines this is estimated at less than one  
12  
13 280 in a million doses (but 1 in 55,000 for Yellow Fever vaccine).<sup>29</sup> Individuals with a history of a  
14  
15 281 possible allergic reaction to drugs or vaccines, or to vaccine components including eggs or chicken  
16  
17 282 proteins, will be excluded from the studies. The research team will be trained and prepared to  
18  
19 283 manage severe allergic reactions.

20  
21 284 Adverse reactions to Yellow Fever vaccine include severe nervous system reaction (about 1 person in  
22  
23 285 125,000) and severe, life-threatening illness with organ failure (about 1 person in 250,000). The  
24  
25 286 mortality for this severe, life-threatening adverse effect is reported as about 50%.<sup>29</sup>

26  
27 287 BCG immunisation is likely to induce a scar in many cases. This may develop over several weeks,  
28  
29 288 starting as a small papule at the injection site which may become ulcerated and then heal over a  
30  
31 289 period of 2 to 5 months; and lymphadenopathy may develop. Occasionally a more severe local  
32  
33 290 reaction occurs (estimated at 1 per 1,000-10,000 doses): for example, an abscess develops and scars  
34  
35 291 may develop into keloids. Rarely BCG can cause disseminated disease (1 per 230,000 to 640,000  
36  
37 292 doses), or disease in sites remote from the immunisation site. Disseminated BCG disease usually  
38  
39 293 occurs in immunocompromised people: HIV positive people will be excluded from these studies.<sup>30</sup>  
40  
41 294 BCG "pre-immunisation" may interfere with the response to the subsequent live vaccines; indeed  
42  
43 295 our hypothesis, and published results, suggest that it may suppress replication of YF 17D vaccine.<sup>31</sup>  
44  
45 296 However, this reduced replication has not been shown to correlate with, or result in, reduced levels  
46  
47 297 of neutralising antibody titres (which are the desired protective outcome).<sup>13 31</sup>

48  
49 298 Oral typhoid vaccine (Ty21a) may occasionally be associated with stomach pain, nausea, vomiting  
50  
51 299 and (rarely) rash.<sup>29</sup>

52  
53 300 Praziquantel has been in use for about 30 years. It has a well-recognised profile of side effects  
54  
55 301 including dizziness, nausea, vomiting, abdominal pain, diarrhoea (sometimes with blood) and  
56  
57 302 urticarial rash. The symptoms are considered to arise largely from the effects of killing worms and to  
58  
59 303 be more severe in people with heavy infections. Symptoms are better tolerated when the drugs are  
60  
304 given after food and we will provide treatment after a meal or snack. Simple medications, such as  
305 paracetamol and cetirizine, can alleviate symptoms and these will be available on treatment days.

306 **References**

- 1  
2  
3  
4  
5  
6 307 1. Wajja A, Kizito D, Nassanga B, et al. The effect of current *Schistosoma mansoni* infection on the  
7 308 immunogenicity of a candidate TB vaccine, MVA85A, in BCG-vaccinated adolescents: An open-label trial.  
8 309 *PLoS neglected tropical diseases* 2017;11(5):e0005440. doi: 10.1371/journal.pntd.0005440 [published Online  
9 310 First: 2017/05/05]
- 10  
11 311 2. WHO. Growth reference 5-19 years. 2007
- 12  
13 312 3. WHO. Global tuberculosis report 2016 [http://www.who.int/tb/publications/global\\_report/en/](http://www.who.int/tb/publications/global_report/en/) (accessed 17  
14 313 June 2017), 2016.
- 15  
16 314 4. Alcais A, Fieschi C, Abel L, et al. Tuberculosis in children and adults: two distinct genetic diseases. *J Exp Med*  
17 315 2005;202(12):1617-21. doi: 10.1084/jem.20052302
- 18  
19 316 5. Weiner J, 3rd, Kaufmann SH. Recent advances towards tuberculosis control: vaccines and biomarkers. *J*  
20 317 *Intern Med* 2014;275(5):467-80. doi: 10.1111/joim.12212
- 21  
22 318 6. Fine PE. Variation in protection by BCG: implications of and for heterologous immunity. *Lancet (London,*  
23 319 *England)* 1995;346(8986):1339-45.
- 24  
25 320 7. Barreto ML, Pilger D, Pereira SM, et al. Causes of variation in BCG vaccine efficacy: examining evidence from  
26 321 the BCG REVAC cluster randomized trial to explore the masking and the blocking hypotheses. *Vaccine*  
27 322 2014;32(30):3759-64. doi: 10.1016/j.vaccine.2014.05.042
- 28  
29 323 8. Black GF, Weir RE, Floyd S, et al. BCG-induced increase in interferon-gamma response to mycobacterial  
30 324 antigens and efficacy of BCG vaccination in Malawi and the UK: two randomised controlled studies. *Lancet*  
31 325 *(London, England)* 2002;359(9315):1393-401. doi: 10.1016/S0140-6736(02)08353-8
- 32  
33 326 9. Tanner R, Kakalacheva K, Miller E, et al. Serum indoleamine 2,3-dioxygenase activity is associated with  
34 327 reduced immunogenicity following vaccination with MVA85A. *BMC infectious diseases* 2014;14:660. doi:  
35 328 10.1186/s12879-014-0660-7 [published Online First: 2014/12/04]
- 36  
37 329 10. WHO. SAGE Evidence to recommendations framework. 2017.  
38 330 [http://www.who.int/immunization/sage/meetings/2017/october/2\\_EvidencetoRecommendationFramework](http://www.who.int/immunization/sage/meetings/2017/october/2_EvidencetoRecommendationFramework_BCG.pdf)  
39 331 [\\_BCG.pdf](http://www.who.int/immunization/sage/meetings/2017/october/2_EvidencetoRecommendationFramework_BCG.pdf) (accessed 16th March 2018).
- 40  
41 332 11. Dye C. Making wider use of the world's most widely used vaccine: Bacille Calmette-Guerin revaccination  
42 333 reconsidered. *Journal of the Royal Society, Interface* 2013;10(87):20130365. doi: 10.1098/rsif.2013.0365  
43 334 [published Online First: 2013/08/02]
- 44  
45 335 12. Kraemer MU, Faria NR, Reiner RC, Jr., et al. Spread of yellow fever virus outbreak in Angola and the  
46 336 Democratic Republic of the Congo 2015-16: a modelling study. *The Lancet Infectious diseases* 2016 doi:  
47 337 10.1016/s1473-3099(16)30513-8 [published Online First: 2016/12/27]
- 48  
49 338 13. Muyanja E, Ssemaganda A, Ngauv P, et al. Immune activation alters cellular and humoral responses to  
50 339 yellow fever 17D vaccine. *The Journal of clinical investigation* 2014;124(7):3147-58. doi: 10.1172/jci75429  
51 340 [published Online First: 2014/06/10]
- 52  
53 341 14. Aguiar M, Stollenwerk N, Halstead SB. The Impact of the Newly Licensed Dengue Vaccine in Endemic  
54 342 Countries. *PLoS neglected tropical diseases* 2016;10(12):e0005179. doi: 10.1371/journal.pntd.0005179  
55 343 [published Online First: 2016/12/22]
- 56  
57 344 15. Dharmasena MN, Osorio M, Filipova S, et al. Stable expression of *Shigella dysenteriae* serotype 1 O-antigen  
58 345 genes integrated into the chromosome of live *Salmonella* oral vaccine vector Ty21a. *Pathogens and disease*  
59 346 2016 doi: 10.1093/femspd/ftw098 [published Online First: 2016/09/23]

- 1  
2  
3 347 16. Carias C, Walters MS, Wefula E, et al. Economic evaluation of typhoid vaccination in a prolonged typhoid  
4 348 outbreak setting: the case of Kasese district in Uganda. *Vaccine* 2015;33(17):2079-85. doi:  
5 349 10.1016/j.vaccine.2015.02.027 [published Online First: 2015/02/26]  
6  
7 350 17. Melhem RF, LoVerde PT. Mechanism of interaction of Salmonella and Schistosoma species. *Infection and*  
8 351 *immunity* 1984;44(2):274-81. [published Online First: 1984/05/01]  
9  
10 352 18. Muniz-Junqueira MI, Tavares-Neto J, Prata A, et al. Antibody response to Salmonella typhi in human  
11 353 schistosomiasis mansoni. *Revista da Sociedade Brasileira de Medicina Tropical* 1996;29(5):441-5. [published  
12 354 Online First: 1996/09/01]  
13  
14 355 19. WHO. Position Paper on Typhoid vaccines: WHO position paper – March 2018 2018  
15  
16 356 20. Brown J, Baisley K, Kavishe B, et al. Impact of malaria and helminth infections on immunogenicity of the  
17 357 human papillomavirus-16/18 AS04-adjuvanted vaccine in Tanzania. *Vaccine* 2014;32(5):611-7. doi:  
18 358 10.1016/j.vaccine.2013.11.061  
19  
20 359 21. Riner DK, Ndombi EM, Carter JM, et al. Schistosoma mansoni Infection Can Jeopardize the Duration of  
21 360 Protective Levels of Antibody Responses to Immunizations against Hepatitis B and Tetanus Toxoid. *PLoS*  
22 361 *neglected tropical diseases* 2016;10(12):e0005180. doi: 10.1371/journal.pntd.0005180  
23  
24 362 22. Centre HI. HPV and related diseases report: Uganda. 2016.  
25 363 <http://www.hpvcentre.net/statistics/reports/UGA.pdf> (accessed 20.01.2017).  
26  
27 364 23. WHO. Human papillomavirus vaccines: WHO position paper, May 2017. *Releve epidemiologique*  
28 365 *hebdomadaire* 2017;92(19):241-68. [published Online First: 2017/05/23]  
29  
30 366 24. Sabin EA, Araujo MI, Carvalho EM, et al. Impairment of tetanus toxoid-specific Th1-like immune responses  
31 367 in humans infected with Schistosoma mansoni. *The Journal of infectious diseases* 1996;173(1):269-72.  
32 368 [published Online First: 1996/01/01]  
33  
34 369 25. Nanteza B, Galukande M, Aceng J, et al. The burden of tetanus in Uganda. *SpringerPlus* 2016;5(1):705. doi:  
35 370 10.1186/s40064-016-2309-z [published Online First: 2016/06/29]  
36  
37 371 26. Ministry of Health–Uganda. Uganda Clinical Guidelines 2016.  
38 372 <http://apps.who.int/medicinedocs/documents/s23532en/s23532en.pdf>  
39  
40 373 27. WHO. Haemoglobin concentrations for the diagnosis of anaemia and assessment of severity. Vitamin and  
41 374 Mineral Nutrition Information System. Geneva, World Health Organization, 2011  
42 375 (WHO/NMH/NHD/MNM/11.1).  
43  
44 376 28. Sanya RE, Nkurunungi G, Hoek Spaans R, et al. The Impact of Intensive Versus Standard Anthelmintic  
45 377 Treatment on Allergy-related Outcomes, Helminth Infection Intensity, and Helminth-related Morbidity in  
46 378 Lake Victoria Fishing Communities, Uganda: Results From the LaVIISWA Cluster-randomized Trial. *Clinical*  
47 379 *Infectious Diseases* 2018:ciy761-ci61. doi: 10.1093/cid/ciy761  
48  
49 380 29. CDC. Centers for Disease Control and Prevention, vaccines and immunizations.  
50  
51 381 30. WHO. Information sheet observed rate of vaccine reactions Bacille Calmette-Guérin (BCG) vaccine. 2012  
52  
53 382 31. Arts RJW, Moorlag S, Novakovic B, et al. BCG Vaccination Protects against Experimental Viral Infection in  
54 383 Humans through the Induction of Cytokines Associated with Trained Immunity. *Cell host & microbe*  
55 384 2018;23(1):89-100.e5. doi: 10.1016/j.chom.2017.12.010 [published Online First: 2018/01/13]  
56 385  
57  
58  
59  
60



# Reporting checklist for protocol of a clinical trial.

Based on the SPIRIT guidelines.

## Instructions to authors

Complete this checklist by entering the page numbers from your manuscript where readers will find each of the items listed below.

Your article may not currently address all the items on the checklist. Please modify your text to include the missing information. If you are certain that an item does not apply, please write "n/a" and provide a short explanation.

Upload your completed checklist as an extra file when you submit to a journal.

In your methods section, say that you used the SPIRIT reporting guidelines, and cite them as:

Chan A-W, Tetzlaff JM, Altman DG, Laupacis A, Gøtzsche PC, Krleža-Jerić K, Hróbjartsson A, Mann H, Dickersin K, Berlin J, Doré C, Parulekar W, Summerskill W, Groves T, Schulz K, Sox H, Rockhold FW, Rennie D, Moher D. SPIRIT 2013 Statement: Defining standard protocol items for clinical trials. *Ann Intern Med.* 2013;158(3):200-207

|                                   | Reporting Item                                                                                                                  | Page Number                                |
|-----------------------------------|---------------------------------------------------------------------------------------------------------------------------------|--------------------------------------------|
| <b>Administrative information</b> |                                                                                                                                 |                                            |
| Title                             | <a href="#">#1</a> Descriptive title identifying the study design, population, interventions, and, if applicable, trial acronym | 1                                          |
| Trial registration                | <a href="#">#2a</a> Trial identifier and registry name. If not yet registered, name of intended registry                        | 2                                          |
| Trial registration: data set      | <a href="#">#2b</a> All items from the World Health Organization Trial Registration Data Set                                    | n/a                                        |
| Protocol version                  | <a href="#">#3</a> Date and version identifier                                                                                  | Information available at<br>ISRCTN60517191 |
| Funding                           | <a href="#">#4</a> Sources and types of financial, material, and other support                                                  | 15                                         |
| Roles and                         | <a href="#">#5a</a> Names, affiliations, and roles of protocol                                                                  | 15                                         |

|                                                            |                     |                                                                                                                                                                                                                                                                                          |                                                              |
|------------------------------------------------------------|---------------------|------------------------------------------------------------------------------------------------------------------------------------------------------------------------------------------------------------------------------------------------------------------------------------------|--------------------------------------------------------------|
| responsibilities:<br>contributorship                       |                     | contributors                                                                                                                                                                                                                                                                             |                                                              |
| Roles and responsibilities:<br>sponsor contact information | <a href="#">#5b</a> | Name and contact information for the trial sponsor                                                                                                                                                                                                                                       | Information available at<br>ISRCTN60517191                   |
| Roles and responsibilities:<br>sponsor and funder          | <a href="#">#5c</a> | Role of study sponsor and funders, if any, in study design; collection, management, analysis, and interpretation of data; writing of the report; and the decision to submit the report for publication, including whether they will have ultimate authority over any of these activities | 16                                                           |
| Roles and responsibilities:<br>committees                  | <a href="#">#5d</a> | Composition, roles, and responsibilities of the coordinating centre, steering committee, endpoint adjudication committee, data management team, and other individuals or groups overseeing the trial, if applicable (see Item 21a for data monitoring committee)                         | Information detailed in<br>supplementary<br>information file |
| <b>Introduction</b>                                        |                     |                                                                                                                                                                                                                                                                                          |                                                              |
| Background and rationale                                   | <a href="#">#6a</a> | Description of research question and justification for undertaking the trial, including summary of relevant studies (published and unpublished) examining benefits and harms for each intervention                                                                                       | 4                                                            |
| Background and rationale: choice of comparators            | <a href="#">#6b</a> | Explanation for choice of comparators                                                                                                                                                                                                                                                    | 8                                                            |
| Objectives                                                 | <a href="#">#7</a>  | Specific objectives or hypotheses                                                                                                                                                                                                                                                        | 6                                                            |
| Trial design                                               | <a href="#">#8</a>  | Description of trial design including type of trial (eg, parallel group, crossover, factorial, single group), allocation ratio, and framework (eg, superiority, equivalence, non-inferiority, exploratory)                                                                               | 7                                                            |

**Methods:  
Participants,  
interventions, and  
outcomes**



|    |                      |                      |                                                                                                                                                                                                                                                                                                                                                                                |                                                           |
|----|----------------------|----------------------|--------------------------------------------------------------------------------------------------------------------------------------------------------------------------------------------------------------------------------------------------------------------------------------------------------------------------------------------------------------------------------|-----------------------------------------------------------|
| 1  | Study setting        | <a href="#">#9</a>   | Description of study settings (eg, community clinic, academic hospital) and list of countries where data will be collected. Reference to where list of study sites can be obtained                                                                                                                                                                                             | 7                                                         |
| 2  |                      |                      |                                                                                                                                                                                                                                                                                                                                                                                |                                                           |
| 3  |                      |                      |                                                                                                                                                                                                                                                                                                                                                                                |                                                           |
| 4  |                      |                      |                                                                                                                                                                                                                                                                                                                                                                                |                                                           |
| 5  |                      |                      |                                                                                                                                                                                                                                                                                                                                                                                |                                                           |
| 6  |                      |                      |                                                                                                                                                                                                                                                                                                                                                                                |                                                           |
| 7  |                      |                      |                                                                                                                                                                                                                                                                                                                                                                                |                                                           |
| 8  | Eligibility criteria | <a href="#">#10</a>  | Inclusion and exclusion criteria for participants. If applicable, eligibility criteria for study centres and individuals who will perform the interventions (eg, surgeons, psychotherapists)                                                                                                                                                                                   | 7                                                         |
| 9  |                      |                      |                                                                                                                                                                                                                                                                                                                                                                                |                                                           |
| 10 |                      |                      |                                                                                                                                                                                                                                                                                                                                                                                |                                                           |
| 11 |                      |                      |                                                                                                                                                                                                                                                                                                                                                                                |                                                           |
| 12 |                      |                      |                                                                                                                                                                                                                                                                                                                                                                                |                                                           |
| 13 |                      |                      |                                                                                                                                                                                                                                                                                                                                                                                |                                                           |
| 14 | Interventions:       | <a href="#">#11a</a> | Interventions for each group with sufficient detail to allow replication, including how and when they will be administered                                                                                                                                                                                                                                                     | 8                                                         |
| 15 | description          |                      |                                                                                                                                                                                                                                                                                                                                                                                |                                                           |
| 16 |                      |                      |                                                                                                                                                                                                                                                                                                                                                                                |                                                           |
| 17 |                      |                      |                                                                                                                                                                                                                                                                                                                                                                                |                                                           |
| 18 |                      |                      |                                                                                                                                                                                                                                                                                                                                                                                |                                                           |
| 19 |                      |                      |                                                                                                                                                                                                                                                                                                                                                                                |                                                           |
| 20 | Interventions:       | <a href="#">#11b</a> | Criteria for discontinuing or modifying allocated interventions for a given trial participant (eg, drug dose change in response to harms, participant request, or improving / worsening disease)                                                                                                                                                                               | Detailed in supplementary information file                |
| 21 | modifications        |                      |                                                                                                                                                                                                                                                                                                                                                                                |                                                           |
| 22 |                      |                      |                                                                                                                                                                                                                                                                                                                                                                                |                                                           |
| 23 |                      |                      |                                                                                                                                                                                                                                                                                                                                                                                |                                                           |
| 24 |                      |                      |                                                                                                                                                                                                                                                                                                                                                                                |                                                           |
| 25 |                      |                      |                                                                                                                                                                                                                                                                                                                                                                                |                                                           |
| 26 |                      |                      |                                                                                                                                                                                                                                                                                                                                                                                |                                                           |
| 27 | Interventions:       | <a href="#">#11c</a> | Strategies to improve adherence to intervention protocols, and any procedures for monitoring adherence (eg, drug tablet return; laboratory tests)                                                                                                                                                                                                                              | Detailed in supplementary information file                |
| 28 | adherence            |                      |                                                                                                                                                                                                                                                                                                                                                                                |                                                           |
| 29 |                      |                      |                                                                                                                                                                                                                                                                                                                                                                                |                                                           |
| 30 |                      |                      |                                                                                                                                                                                                                                                                                                                                                                                |                                                           |
| 31 |                      |                      |                                                                                                                                                                                                                                                                                                                                                                                |                                                           |
| 32 | Interventions:       | <a href="#">#11d</a> | Relevant concomitant care and interventions that are permitted or prohibited during the trial                                                                                                                                                                                                                                                                                  | Detailed in supplementary information file                |
| 33 | concomitant care     |                      |                                                                                                                                                                                                                                                                                                                                                                                |                                                           |
| 34 |                      |                      |                                                                                                                                                                                                                                                                                                                                                                                |                                                           |
| 35 |                      |                      |                                                                                                                                                                                                                                                                                                                                                                                |                                                           |
| 36 |                      |                      |                                                                                                                                                                                                                                                                                                                                                                                |                                                           |
| 37 | Outcomes             | <a href="#">#12</a>  | Primary, secondary, and other outcomes, including the specific measurement variable (eg, systolic blood pressure), analysis metric (eg, change from baseline, final value, time to event), method of aggregation (eg, median, proportion), and time point for each outcome. Explanation of the clinical relevance of chosen efficacy and harm outcomes is strongly recommended | 10                                                        |
| 38 |                      |                      |                                                                                                                                                                                                                                                                                                                                                                                |                                                           |
| 39 |                      |                      |                                                                                                                                                                                                                                                                                                                                                                                |                                                           |
| 40 |                      |                      |                                                                                                                                                                                                                                                                                                                                                                                |                                                           |
| 41 |                      |                      |                                                                                                                                                                                                                                                                                                                                                                                |                                                           |
| 42 |                      |                      |                                                                                                                                                                                                                                                                                                                                                                                |                                                           |
| 43 |                      |                      |                                                                                                                                                                                                                                                                                                                                                                                |                                                           |
| 44 |                      |                      |                                                                                                                                                                                                                                                                                                                                                                                |                                                           |
| 45 |                      |                      |                                                                                                                                                                                                                                                                                                                                                                                |                                                           |
| 46 |                      |                      |                                                                                                                                                                                                                                                                                                                                                                                |                                                           |
| 47 |                      |                      |                                                                                                                                                                                                                                                                                                                                                                                |                                                           |
| 48 |                      |                      |                                                                                                                                                                                                                                                                                                                                                                                |                                                           |
| 49 |                      |                      |                                                                                                                                                                                                                                                                                                                                                                                |                                                           |
| 50 | Participant timeline | <a href="#">#13</a>  | Time schedule of enrolment, interventions (including any run-ins and washouts), assessments, and visits for participants. A schematic diagram is highly recommended (see Figure)                                                                                                                                                                                               | 14                                                        |
| 51 |                      |                      |                                                                                                                                                                                                                                                                                                                                                                                |                                                           |
| 52 |                      |                      |                                                                                                                                                                                                                                                                                                                                                                                |                                                           |
| 53 |                      |                      |                                                                                                                                                                                                                                                                                                                                                                                | Also detailed in supplementary information file, Table S1 |
| 54 |                      |                      |                                                                                                                                                                                                                                                                                                                                                                                |                                                           |
| 55 |                      |                      |                                                                                                                                                                                                                                                                                                                                                                                |                                                           |
| 56 |                      |                      |                                                                                                                                                                                                                                                                                                                                                                                |                                                           |
| 57 |                      |                      |                                                                                                                                                                                                                                                                                                                                                                                |                                                           |
| 58 |                      |                      |                                                                                                                                                                                                                                                                                                                                                                                |                                                           |
| 59 |                      |                      |                                                                                                                                                                                                                                                                                                                                                                                |                                                           |
| 60 |                      |                      |                                                                                                                                                                                                                                                                                                                                                                                |                                                           |

|    |             |                     |                                                    |                  |
|----|-------------|---------------------|----------------------------------------------------|------------------|
| 1  | Sample size | <a href="#">#14</a> | Estimated number of participants needed to achieve | 11               |
| 2  |             |                     | study objectives and how it was determined,        |                  |
| 3  |             |                     | including clinical and statistical assumptions     |                  |
| 4  |             |                     | supporting any sample size calculations            |                  |
| 5  |             |                     |                                                    |                  |
| 6  |             |                     |                                                    |                  |
| 7  |             |                     |                                                    |                  |
| 8  | Recruitment | <a href="#">#15</a> | Strategies for achieving adequate participant      | Detailed in      |
| 9  |             |                     | enrolment to reach target sample size              | supplementary    |
| 10 |             |                     |                                                    | information file |
| 11 |             |                     |                                                    |                  |
| 12 |             |                     |                                                    |                  |

### 13 **Methods:**

#### 14 **Assignment of** 15 **interventions (for** 16 **controlled trials)**

|    |                      |                      |                                                          |                  |
|----|----------------------|----------------------|----------------------------------------------------------|------------------|
| 19 |                      |                      |                                                          |                  |
| 20 | Allocation: sequence | <a href="#">#16a</a> | Method of generating the allocation sequence (eg,        | 8                |
| 21 | generation           |                      | computer-generated random numbers), and list of          |                  |
| 22 |                      |                      | any factors for stratification. To reduce predictability |                  |
| 23 |                      |                      | of a random sequence, details of any planned             |                  |
| 24 |                      |                      | restriction (eg, blocking) should be provided in a       |                  |
| 25 |                      |                      | separate document that is unavailable to those who       |                  |
| 26 |                      |                      | enrol participants or assign interventions               |                  |
| 27 |                      |                      |                                                          |                  |
| 28 |                      |                      |                                                          |                  |
| 29 |                      |                      |                                                          |                  |
| 30 |                      |                      |                                                          |                  |
| 31 | Allocation           | <a href="#">#16b</a> | Mechanism of implementing the allocation sequence        | 9                |
| 32 | concealment          |                      | (eg, central telephone; sequentially numbered,           |                  |
| 33 | mechanism            |                      | opaque, sealed envelopes), describing any steps to       |                  |
| 34 |                      |                      | conceal the sequence until interventions are assigned    |                  |
| 35 |                      |                      |                                                          |                  |
| 36 |                      |                      |                                                          |                  |
| 37 |                      |                      |                                                          |                  |
| 38 | Allocation:          | <a href="#">#16c</a> | Who will generate the allocation sequence, who will      | 8, 9             |
| 39 | implementation       |                      | enrol participants, and who will assign participants to  |                  |
| 40 |                      |                      | interventions                                            |                  |
| 41 |                      |                      |                                                          |                  |
| 42 |                      |                      |                                                          |                  |
| 43 | Blinding (masking)   | <a href="#">#17a</a> | Who will be blinded after assignment to                  | 9                |
| 44 |                      |                      | interventions (eg, trial participants, care providers,   |                  |
| 45 |                      |                      | outcome assessors, data analysts), and how               |                  |
| 46 |                      |                      |                                                          |                  |
| 47 |                      |                      |                                                          |                  |
| 48 |                      |                      |                                                          |                  |
| 49 | Blinding (masking):  | <a href="#">#17b</a> | If blinded, circumstances under which unblinding is      | Detailed in      |
| 50 | emergency            |                      | permissible, and procedure for revealing a               | supplementary    |
| 51 | unblinding           |                      | participant's allocated intervention during the trial    | information file |
| 52 |                      |                      |                                                          |                  |
| 53 |                      |                      |                                                          |                  |

#### 54 **Methods: Data** 55 **collection,** 56 **management, and** 57 **analysis**

|    |                                                  |                      |                                                                                                                                                                                                                                                                                                                                                                                                              |                                                                                                  |
|----|--------------------------------------------------|----------------------|--------------------------------------------------------------------------------------------------------------------------------------------------------------------------------------------------------------------------------------------------------------------------------------------------------------------------------------------------------------------------------------------------------------|--------------------------------------------------------------------------------------------------|
| 1  | Data collection plan                             | <a href="#">#18a</a> | Plans for assessment and collection of outcome, baseline, and other trial data, including any related processes to promote data quality (eg, duplicate measurements, training of assessors) and a description of study instruments (eg, questionnaires, laboratory tests) along with their reliability and validity, if known. Reference to where data collection forms can be found, if not in the protocol | 10.<br>More details in supplementary information file                                            |
| 2  |                                                  |                      |                                                                                                                                                                                                                                                                                                                                                                                                              |                                                                                                  |
| 3  |                                                  |                      |                                                                                                                                                                                                                                                                                                                                                                                                              |                                                                                                  |
| 4  |                                                  |                      |                                                                                                                                                                                                                                                                                                                                                                                                              |                                                                                                  |
| 5  |                                                  |                      |                                                                                                                                                                                                                                                                                                                                                                                                              |                                                                                                  |
| 6  |                                                  |                      |                                                                                                                                                                                                                                                                                                                                                                                                              |                                                                                                  |
| 7  |                                                  |                      |                                                                                                                                                                                                                                                                                                                                                                                                              |                                                                                                  |
| 8  |                                                  |                      |                                                                                                                                                                                                                                                                                                                                                                                                              |                                                                                                  |
| 9  |                                                  |                      |                                                                                                                                                                                                                                                                                                                                                                                                              |                                                                                                  |
| 10 |                                                  |                      |                                                                                                                                                                                                                                                                                                                                                                                                              |                                                                                                  |
| 11 |                                                  |                      |                                                                                                                                                                                                                                                                                                                                                                                                              |                                                                                                  |
| 12 |                                                  |                      |                                                                                                                                                                                                                                                                                                                                                                                                              |                                                                                                  |
| 13 |                                                  |                      |                                                                                                                                                                                                                                                                                                                                                                                                              |                                                                                                  |
| 14 | Data collection plan: retention                  | <a href="#">#18b</a> | Plans to promote participant retention and complete follow-up, including list of any outcome data to be collected for participants who discontinue or deviate from intervention protocols                                                                                                                                                                                                                    | Detailed in supplementary information file                                                       |
| 15 |                                                  |                      |                                                                                                                                                                                                                                                                                                                                                                                                              |                                                                                                  |
| 16 |                                                  |                      |                                                                                                                                                                                                                                                                                                                                                                                                              |                                                                                                  |
| 17 |                                                  |                      |                                                                                                                                                                                                                                                                                                                                                                                                              |                                                                                                  |
| 18 |                                                  |                      |                                                                                                                                                                                                                                                                                                                                                                                                              |                                                                                                  |
| 19 |                                                  |                      |                                                                                                                                                                                                                                                                                                                                                                                                              |                                                                                                  |
| 20 |                                                  |                      |                                                                                                                                                                                                                                                                                                                                                                                                              |                                                                                                  |
| 21 | Data management                                  | <a href="#">#19</a>  | Plans for data entry, coding, security, and storage, including any related processes to promote data quality (eg, double data entry; range checks for data values). Reference to where details of data management procedures can be found, if not in the protocol                                                                                                                                            | 13.<br>More information in the statistical analysis plan found at <a href="#">ISRCTN60517191</a> |
| 22 |                                                  |                      |                                                                                                                                                                                                                                                                                                                                                                                                              |                                                                                                  |
| 23 |                                                  |                      |                                                                                                                                                                                                                                                                                                                                                                                                              |                                                                                                  |
| 24 |                                                  |                      |                                                                                                                                                                                                                                                                                                                                                                                                              |                                                                                                  |
| 25 |                                                  |                      |                                                                                                                                                                                                                                                                                                                                                                                                              |                                                                                                  |
| 26 |                                                  |                      |                                                                                                                                                                                                                                                                                                                                                                                                              |                                                                                                  |
| 27 |                                                  |                      |                                                                                                                                                                                                                                                                                                                                                                                                              |                                                                                                  |
| 28 |                                                  |                      |                                                                                                                                                                                                                                                                                                                                                                                                              |                                                                                                  |
| 29 |                                                  |                      |                                                                                                                                                                                                                                                                                                                                                                                                              |                                                                                                  |
| 30 |                                                  |                      |                                                                                                                                                                                                                                                                                                                                                                                                              |                                                                                                  |
| 31 | Statistics: outcomes                             | <a href="#">#20a</a> | Statistical methods for analysing primary and secondary outcomes. Reference to where other details of the statistical analysis plan can be found, if not in the protocol                                                                                                                                                                                                                                     | 13.<br>More information in the statistical analysis plan found at <a href="#">ISRCTN60517191</a> |
| 32 |                                                  |                      |                                                                                                                                                                                                                                                                                                                                                                                                              |                                                                                                  |
| 33 |                                                  |                      |                                                                                                                                                                                                                                                                                                                                                                                                              |                                                                                                  |
| 34 |                                                  |                      |                                                                                                                                                                                                                                                                                                                                                                                                              |                                                                                                  |
| 35 |                                                  |                      |                                                                                                                                                                                                                                                                                                                                                                                                              |                                                                                                  |
| 36 |                                                  |                      |                                                                                                                                                                                                                                                                                                                                                                                                              |                                                                                                  |
| 37 |                                                  |                      |                                                                                                                                                                                                                                                                                                                                                                                                              |                                                                                                  |
| 38 |                                                  |                      |                                                                                                                                                                                                                                                                                                                                                                                                              |                                                                                                  |
| 39 |                                                  |                      |                                                                                                                                                                                                                                                                                                                                                                                                              |                                                                                                  |
| 40 | Statistics: additional analyses                  | <a href="#">#20b</a> | Methods for any additional analyses (eg, subgroup and adjusted analyses)                                                                                                                                                                                                                                                                                                                                     | 11.<br>More information in the statistical analysis plan found at <a href="#">ISRCTN60517191</a> |
| 41 |                                                  |                      |                                                                                                                                                                                                                                                                                                                                                                                                              |                                                                                                  |
| 42 |                                                  |                      |                                                                                                                                                                                                                                                                                                                                                                                                              |                                                                                                  |
| 43 |                                                  |                      |                                                                                                                                                                                                                                                                                                                                                                                                              |                                                                                                  |
| 44 |                                                  |                      |                                                                                                                                                                                                                                                                                                                                                                                                              |                                                                                                  |
| 45 |                                                  |                      |                                                                                                                                                                                                                                                                                                                                                                                                              |                                                                                                  |
| 46 |                                                  |                      |                                                                                                                                                                                                                                                                                                                                                                                                              |                                                                                                  |
| 47 |                                                  |                      |                                                                                                                                                                                                                                                                                                                                                                                                              |                                                                                                  |
| 48 |                                                  |                      |                                                                                                                                                                                                                                                                                                                                                                                                              |                                                                                                  |
| 49 | Statistics: analysis population and missing data | <a href="#">#20c</a> | Definition of analysis population relating to protocol non-adherence (eg, as randomised analysis), and any statistical methods to handle missing data (eg, multiple imputation)                                                                                                                                                                                                                              | Information in the statistical analysis plan found at <a href="#">ISRCTN60517191</a>             |
| 50 |                                                  |                      |                                                                                                                                                                                                                                                                                                                                                                                                              |                                                                                                  |
| 51 |                                                  |                      |                                                                                                                                                                                                                                                                                                                                                                                                              |                                                                                                  |
| 52 |                                                  |                      |                                                                                                                                                                                                                                                                                                                                                                                                              |                                                                                                  |
| 53 |                                                  |                      |                                                                                                                                                                                                                                                                                                                                                                                                              |                                                                                                  |
| 54 |                                                  |                      |                                                                                                                                                                                                                                                                                                                                                                                                              |                                                                                                  |

## Methods: Monitoring

|    |                      |                      |                                                          |                  |
|----|----------------------|----------------------|----------------------------------------------------------|------------------|
| 1  | Data monitoring:     | <a href="#">#21a</a> | Composition of data monitoring committee (DMC);          | Detailed in      |
| 2  | formal committee     |                      | summary of its role and reporting structure;             | supplementary    |
| 3  |                      |                      | statement of whether it is independent from the          | information file |
| 4  |                      |                      | sponsor and competing interests; and reference to        |                  |
| 5  |                      |                      | where further details about its charter can be found,    |                  |
| 6  |                      |                      | if not in the protocol. Alternatively, an explanation of |                  |
| 7  |                      |                      | why a DMC is not needed                                  |                  |
| 8  |                      |                      |                                                          |                  |
| 9  |                      |                      |                                                          |                  |
| 10 |                      |                      |                                                          |                  |
| 11 |                      |                      |                                                          |                  |
| 12 | Data monitoring:     | <a href="#">#21b</a> | Description of any interim analyses and stopping         | Detailed in      |
| 13 | interim analysis     |                      | guidelines, including who will have access to these      | supplementary    |
| 14 |                      |                      | interim results and make the final decision to           | information file |
| 15 |                      |                      | terminate the trial                                      |                  |
| 16 |                      |                      |                                                          |                  |
| 17 |                      |                      |                                                          |                  |
| 18 |                      |                      |                                                          |                  |
| 19 | Harms                | <a href="#">#22</a>  | Plans for collecting, assessing, reporting, and          | Detailed in      |
| 20 |                      |                      | managing solicited and spontaneously reported            | supplementary    |
| 21 |                      |                      | adverse events and other unintended effects of trial     | information file |
| 22 |                      |                      | interventions or trial conduct                           |                  |
| 23 |                      |                      |                                                          |                  |
| 24 |                      |                      |                                                          |                  |
| 25 |                      |                      |                                                          |                  |
| 26 | Auditing             | <a href="#">#23</a>  | Frequency and procedures for auditing trial conduct,     | Detailed in      |
| 27 |                      |                      | if any, and whether the process will be independent      | supplementary    |
| 28 |                      |                      | from investigators and the sponsor                       | information file |
| 29 |                      |                      |                                                          |                  |
| 30 |                      |                      |                                                          |                  |
| 31 | <b>Ethics and</b>    |                      |                                                          |                  |
| 32 | <b>dissemination</b> |                      |                                                          |                  |
| 33 |                      |                      |                                                          |                  |
| 34 |                      |                      |                                                          |                  |
| 35 | Research ethics      | <a href="#">#24</a>  | Plans for seeking research ethics committee /            | 12               |
| 36 | approval             |                      | institutional review board (REC / IRB) approval          |                  |
| 37 |                      |                      |                                                          |                  |
| 38 |                      |                      |                                                          |                  |
| 39 | Protocol             | <a href="#">#25</a>  | Plans for communicating important protocol               | 11               |
| 40 | amendments           |                      | modifications (eg, changes to eligibility criteria,      |                  |
| 41 |                      |                      | outcomes, analyses) to relevant parties (eg,             |                  |
| 42 |                      |                      | investigators, REC / IRBs, trial participants, trial     |                  |
| 43 |                      |                      | registries, journals, regulators)                        |                  |
| 44 |                      |                      |                                                          |                  |
| 45 |                      |                      |                                                          |                  |
| 46 |                      |                      |                                                          |                  |
| 47 | Consent or assent    | <a href="#">#26a</a> | Who will obtain informed consent or assent from          | 12.              |
| 48 |                      |                      | potential trial participants or authorised surrogates,   |                  |
| 49 |                      |                      | and how (see Item 32)                                    | Also detailed in |
| 50 |                      |                      |                                                          | supplementary    |
| 51 |                      |                      |                                                          | information file |
| 52 |                      |                      |                                                          |                  |
| 53 |                      |                      |                                                          |                  |
| 54 |                      |                      |                                                          |                  |
| 55 | Consent or assent:   | <a href="#">#26b</a> | Additional consent provisions for collection and use     | Detailed in      |
| 56 | ancillary studies    |                      | of participant data and biological specimens in          | supplementary    |
| 57 |                      |                      | ancillary studies, if applicable                         | information file |
| 58 |                      |                      |                                                          |                  |
| 59 |                      |                      |                                                          |                  |
| 60 |                      |                      |                                                          |                  |

|    |                                             |                      |                                                                                                                                                                                                                                                                                     |                                            |
|----|---------------------------------------------|----------------------|-------------------------------------------------------------------------------------------------------------------------------------------------------------------------------------------------------------------------------------------------------------------------------------|--------------------------------------------|
| 1  | Confidentiality                             | <a href="#">#27</a>  | How personal information about potential and enrolled participants will be collected, shared, and maintained in order to protect confidentiality before, during, and after the trial                                                                                                | Detailed in supplementary information file |
| 2  |                                             |                      |                                                                                                                                                                                                                                                                                     |                                            |
| 3  |                                             |                      |                                                                                                                                                                                                                                                                                     |                                            |
| 4  |                                             |                      |                                                                                                                                                                                                                                                                                     |                                            |
| 5  |                                             |                      |                                                                                                                                                                                                                                                                                     |                                            |
| 6  |                                             |                      |                                                                                                                                                                                                                                                                                     |                                            |
| 7  |                                             |                      |                                                                                                                                                                                                                                                                                     |                                            |
| 8  | Declaration of interests                    | <a href="#">#28</a>  | Financial and other competing interests for principal investigators for the overall trial and each study site                                                                                                                                                                       | 15                                         |
| 9  |                                             |                      |                                                                                                                                                                                                                                                                                     |                                            |
| 10 |                                             |                      |                                                                                                                                                                                                                                                                                     |                                            |
| 11 | Data access                                 | <a href="#">#29</a>  | Statement of who will have access to the final trial dataset, and disclosure of contractual agreements that limit such access for investigators                                                                                                                                     | n/a                                        |
| 12 |                                             |                      |                                                                                                                                                                                                                                                                                     |                                            |
| 13 |                                             |                      |                                                                                                                                                                                                                                                                                     |                                            |
| 14 |                                             |                      |                                                                                                                                                                                                                                                                                     |                                            |
| 15 |                                             |                      |                                                                                                                                                                                                                                                                                     |                                            |
| 16 |                                             |                      |                                                                                                                                                                                                                                                                                     |                                            |
| 17 | Ancillary and post trial care               | <a href="#">#30</a>  | Provisions, if any, for ancillary and post-trial care, and for compensation to those who suffer harm from trial participation                                                                                                                                                       | Detailed in supplementary information file |
| 18 |                                             |                      |                                                                                                                                                                                                                                                                                     |                                            |
| 19 |                                             |                      |                                                                                                                                                                                                                                                                                     |                                            |
| 20 |                                             |                      |                                                                                                                                                                                                                                                                                     |                                            |
| 21 |                                             |                      |                                                                                                                                                                                                                                                                                     |                                            |
| 22 | Dissemination policy: trial results         | <a href="#">#31a</a> | Plans for investigators and sponsor to communicate trial results to participants, healthcare professionals, the public, and other relevant groups (eg, via publication, reporting in results databases, or other data sharing arrangements), including any publication restrictions | 2, 13                                      |
| 23 |                                             |                      |                                                                                                                                                                                                                                                                                     |                                            |
| 24 |                                             |                      |                                                                                                                                                                                                                                                                                     |                                            |
| 25 |                                             |                      |                                                                                                                                                                                                                                                                                     |                                            |
| 26 |                                             |                      |                                                                                                                                                                                                                                                                                     |                                            |
| 27 |                                             |                      |                                                                                                                                                                                                                                                                                     |                                            |
| 28 |                                             |                      |                                                                                                                                                                                                                                                                                     |                                            |
| 29 |                                             |                      |                                                                                                                                                                                                                                                                                     |                                            |
| 30 |                                             |                      |                                                                                                                                                                                                                                                                                     |                                            |
| 31 |                                             |                      |                                                                                                                                                                                                                                                                                     |                                            |
| 32 | Dissemination policy: authorship            | <a href="#">#31b</a> | Authorship eligibility guidelines and any intended use of professional writers                                                                                                                                                                                                      | n/a                                        |
| 33 |                                             |                      |                                                                                                                                                                                                                                                                                     |                                            |
| 34 |                                             |                      |                                                                                                                                                                                                                                                                                     |                                            |
| 35 |                                             |                      |                                                                                                                                                                                                                                                                                     |                                            |
| 36 | Dissemination policy: reproducible research | <a href="#">#31c</a> | Plans, if any, for granting public access to the full protocol, participant-level dataset, and statistical code                                                                                                                                                                     | 13                                         |
| 37 |                                             |                      |                                                                                                                                                                                                                                                                                     |                                            |
| 38 |                                             |                      |                                                                                                                                                                                                                                                                                     |                                            |
| 39 |                                             |                      |                                                                                                                                                                                                                                                                                     |                                            |
| 40 |                                             |                      |                                                                                                                                                                                                                                                                                     |                                            |
| 41 | <b>Appendices</b>                           |                      |                                                                                                                                                                                                                                                                                     |                                            |
| 42 |                                             |                      |                                                                                                                                                                                                                                                                                     |                                            |
| 43 | Informed consent materials                  | <a href="#">#32</a>  | Model consent form and other related documentation given to participants and authorised surrogates                                                                                                                                                                                  | n/a                                        |
| 44 |                                             |                      |                                                                                                                                                                                                                                                                                     |                                            |
| 45 |                                             |                      |                                                                                                                                                                                                                                                                                     |                                            |
| 46 |                                             |                      |                                                                                                                                                                                                                                                                                     |                                            |
| 47 | Biological specimens                        | <a href="#">#33</a>  | Plans for collection, laboratory evaluation, and storage of biological specimens for genetic or molecular analysis in the current trial and for future use in ancillary studies, if applicable                                                                                      | n/a                                        |
| 48 |                                             |                      |                                                                                                                                                                                                                                                                                     |                                            |
| 49 |                                             |                      |                                                                                                                                                                                                                                                                                     |                                            |
| 50 |                                             |                      |                                                                                                                                                                                                                                                                                     |                                            |
| 51 |                                             |                      |                                                                                                                                                                                                                                                                                     |                                            |
| 52 |                                             |                      |                                                                                                                                                                                                                                                                                     |                                            |
| 53 |                                             |                      |                                                                                                                                                                                                                                                                                     |                                            |

None The SPIRIT checklist is distributed under the terms of the Creative Commons Attribution License CC-BY-ND 3.0. This checklist can be completed online using <https://www.goodreports.org/>, a tool made by the [EQUATOR Network](#) in collaboration with [Penelope.ai](#)

# BMJ Open

**The effect of intensive treatment for schistosomiasis on immune responses to vaccines among rural Ugandan island adolescents: randomised controlled trial protocol A for the 'POPulation differences in VACcine responses' (POPVAC) programme**

|                               |                                                                                                                                                                                                                                                                                                                                                                                                                                                                                                                                                                                                                                                                                                                                                                                                                                                                                                                                                                                                                                                                                                                                                                                                                                                                                                                                                                                                                                                                                                                                                                                                                                                                                                                                                                                                                                                                                                                                                                                             |
|-------------------------------|---------------------------------------------------------------------------------------------------------------------------------------------------------------------------------------------------------------------------------------------------------------------------------------------------------------------------------------------------------------------------------------------------------------------------------------------------------------------------------------------------------------------------------------------------------------------------------------------------------------------------------------------------------------------------------------------------------------------------------------------------------------------------------------------------------------------------------------------------------------------------------------------------------------------------------------------------------------------------------------------------------------------------------------------------------------------------------------------------------------------------------------------------------------------------------------------------------------------------------------------------------------------------------------------------------------------------------------------------------------------------------------------------------------------------------------------------------------------------------------------------------------------------------------------------------------------------------------------------------------------------------------------------------------------------------------------------------------------------------------------------------------------------------------------------------------------------------------------------------------------------------------------------------------------------------------------------------------------------------------------|
| Journal:                      | <i>BMJ Open</i>                                                                                                                                                                                                                                                                                                                                                                                                                                                                                                                                                                                                                                                                                                                                                                                                                                                                                                                                                                                                                                                                                                                                                                                                                                                                                                                                                                                                                                                                                                                                                                                                                                                                                                                                                                                                                                                                                                                                                                             |
| Manuscript ID                 | bmjopen-2020-040426.R1                                                                                                                                                                                                                                                                                                                                                                                                                                                                                                                                                                                                                                                                                                                                                                                                                                                                                                                                                                                                                                                                                                                                                                                                                                                                                                                                                                                                                                                                                                                                                                                                                                                                                                                                                                                                                                                                                                                                                                      |
| Article Type:                 | Protocol                                                                                                                                                                                                                                                                                                                                                                                                                                                                                                                                                                                                                                                                                                                                                                                                                                                                                                                                                                                                                                                                                                                                                                                                                                                                                                                                                                                                                                                                                                                                                                                                                                                                                                                                                                                                                                                                                                                                                                                    |
| Date Submitted by the Author: | 05-Oct-2020                                                                                                                                                                                                                                                                                                                                                                                                                                                                                                                                                                                                                                                                                                                                                                                                                                                                                                                                                                                                                                                                                                                                                                                                                                                                                                                                                                                                                                                                                                                                                                                                                                                                                                                                                                                                                                                                                                                                                                                 |
| Complete List of Authors:     | Nkurunungi, Gyaviira; MRC/UVRI and LSHTM Uganda Research Unit, Immunomodulation and Vaccines Programme<br>Zirimenya , Ludoviko ; MRC/UVRI and LSHTM Uganda Research Unit, Immunomodulation and Vaccines Programme<br>Nassuuna , Jacent; MRC/UVRI and LSHTM Uganda Research Unit, Immunomodulation and Vaccines Programme<br>Natukunda , Agnes ; MRC/UVRI and LSHTM Uganda Research Unit, Immunomodulation and Vaccines Programme<br>Kabuubi , Prossy ; MRC/UVRI and LSHTM Uganda Research Unit, Immunomodulation and Vaccines Programme<br>Niwagaba , Emmanuel ; MRC/UVRI and LSHTM Uganda Research Unit, Immunomodulation and Vaccines Programme<br>Oduru, Gloria; MRC/UVRI and LSHTM Uganda Research Unit, Immunomodulation and Vaccines Programme<br>Kabami , Grace ; MRC/UVRI and LSHTM Uganda Research Unit, Immunomodulation and Vaccines Programme<br>Amongin , Rebecca ; MRC/UVRI and LSHTM Uganda Research Unit, Immunomodulation and Vaccines Programme<br>Mutebe , Alex ; MRC/UVRI and LSHTM Uganda Research Unit, Immunomodulation and Vaccines Programme<br>Namutebi , Milly ; MRC/UVRI and LSHTM Uganda Research Unit, Immunomodulation and Vaccines Programme<br>Zziwa , Christopher ; MRC/UVRI and LSHTM Uganda Research Unit, Immunomodulation and Vaccines Programme<br>Amongi, Susan; MRC/UVRI and LSHTM Uganda Research Unit, Immunomodulation and Vaccines Programme<br>Ninsiima , Caroline ; MRC/UVRI and LSHTM Uganda Research Unit, Immunomodulation and Vaccines Programme<br>Onen, Caroline; MRC/UVRI and LSHTM Uganda Research Unit, Immunomodulation and Vaccines Programme<br>Akello , Florence ; MRC/UVRI and LSHTM Uganda Research Unit, Immunomodulation and Vaccines Programme<br>Sewankambo, Moses; MRC/UVRI and LSHTM Uganda Research Unit, Immunomodulation and Vaccines Programme<br>Kiwanuka, Samuel; MRC/UVRI and LSHTM Uganda Research Unit, Immunomodulation and Vaccines Programme<br>Kizindo , Robert ; MRC/UVRI and LSHTM Uganda Research Unit, |

|                                   |                                                                                                                                                                                                                                                                                                                                                                                                                                                                                                                                                                                                                                                                   |
|-----------------------------------|-------------------------------------------------------------------------------------------------------------------------------------------------------------------------------------------------------------------------------------------------------------------------------------------------------------------------------------------------------------------------------------------------------------------------------------------------------------------------------------------------------------------------------------------------------------------------------------------------------------------------------------------------------------------|
|                                   | <p>Immunomodulation and Vaccines Programme<br/> Kaweesa, James; Republic of Uganda Ministry of Health, Vector Control Division<br/> Cose, Stephen; MRC/UVRI and LSHTM Uganda Research Unit, Immunomodulation and Vaccines Programme; London School of Hygiene and Tropical Medicine Department of Clinical Research<br/> Webb, Emily; London School of Hygiene &amp; Tropical Medicine, MRC Tropical Epidemiology Group, Department of Infectious Disease Epidemiology<br/> Elliott, Alison; MRC/UVRI and LSHTM Uganda Research Unit, Immunomodulation and Vaccines Programme; London School of Hygiene and Tropical Medicine Department of Clinical Research</p> |
| <b>Primary Subject Heading:</b>   | Infectious diseases                                                                                                                                                                                                                                                                                                                                                                                                                                                                                                                                                                                                                                               |
| <b>Secondary Subject Heading:</b> | Epidemiology, Immunology (including allergy), Public health                                                                                                                                                                                                                                                                                                                                                                                                                                                                                                                                                                                                       |
| <b>Keywords:</b>                  | Infection control < INFECTIOUS DISEASES, PARASITOLOGY, Public health < INFECTIOUS DISEASES, Immunology < TROPICAL MEDICINE, Epidemiology < TROPICAL MEDICINE, Paediatric infectious disease & immunisation < PAEDIATRICS                                                                                                                                                                                                                                                                                                                                                                                                                                          |
|                                   |                                                                                                                                                                                                                                                                                                                                                                                                                                                                                                                                                                                                                                                                   |

SCHOLARONE™  
Manuscripts



I, the Submitting Author has the right to grant and does grant on behalf of all authors of the Work (as defined in the below author licence), an exclusive licence and/or a non-exclusive licence for contributions from authors who are: i) UK Crown employees; ii) where BMJ has agreed a CC-BY licence shall apply, and/or iii) in accordance with the terms applicable for US Federal Government officers or employees acting as part of their official duties; on a worldwide, perpetual, irrevocable, royalty-free basis to BMJ Publishing Group Ltd ("BMJ") its licensees and where the relevant Journal is co-owned by BMJ to the co-owners of the Journal, to publish the Work in this journal and any other BMJ products and to exploit all rights, as set out in our [licence](#).

The Submitting Author accepts and understands that any supply made under these terms is made by BMJ to the Submitting Author unless you are acting as an employee on behalf of your employer or a postgraduate student of an affiliated institution which is paying any applicable article publishing charge ("APC") for Open Access articles. Where the Submitting Author wishes to make the Work available on an Open Access basis (and intends to pay the relevant APC), the terms of reuse of such Open Access shall be governed by a Creative Commons licence – details of these licences and which [Creative Commons](#) licence will apply to this Work are set out in our licence referred to above.

Other than as permitted in any relevant BMJ Author's Self Archiving Policies, I confirm this Work has not been accepted for publication elsewhere, is not being considered for publication elsewhere and does not duplicate material already published. I confirm all authors consent to publication of this Work and authorise the granting of this licence.



1  
2  
3 1 **The effect of intensive treatment for schistosomiasis on immune responses to vaccines among**  
4 **rural Ugandan island adolescents: randomised controlled trial protocol A for the ‘POPulation**  
5 **differences in VACCine responses’ (POPVAC) programme**  
6  
7

8  
9 4 Gyaviira Nkurunungi<sup>1,¶,\*</sup>, Ludoviko Zirimenya<sup>1,¶</sup>, Jacent Nassuuna<sup>1,¶</sup>, Agnes Natukunda<sup>1,¶</sup>, Prossy N  
10 Kabuubi<sup>1</sup>, Emmanuel Niwagaba<sup>1</sup>, Gloria Oduru<sup>1</sup>, Grace Kabami<sup>1</sup>, Rebecca Amongin<sup>1</sup>, Alex Mutebe<sup>1</sup>,  
11 Milly Namutebi<sup>1</sup>, Christopher Zziwa<sup>1</sup>, Susan Amongi<sup>1</sup>, Caroline Ninsiima<sup>1</sup>, Caroline Onen<sup>1</sup>, Florence  
12 Akello<sup>1</sup>, Moses Sewankambo<sup>1</sup>, Samuel Kiwanuka<sup>1</sup>, Robert Kizindo<sup>1</sup>, James Kaweesa<sup>2</sup>, Stephen Cose<sup>1,3</sup>,  
13  
14 7 Emily L Webb<sup>4</sup>, Alison M Elliott<sup>1,3</sup> **for the POPVAC trial team**  
15  
16 8

17 9  
18  
19  
20 10 <sup>1</sup>Immunomodulation and Vaccines Programme, Medical Research Council/Uganda Virus Research  
21 Institute and London School of Hygiene and Tropical Medicine (MRC/UVRI and LSHTM) Uganda  
22 11  
23 12 Research Unit, Entebbe, Uganda

24  
25 13 <sup>2</sup>Vector Control Division, Ministry of Health, Kampala, Uganda

26  
27 14 <sup>3</sup>Department of Clinical Research, London School of Hygiene and Tropical Medicine, London, United  
28 15 Kingdom

29  
30 16 <sup>4</sup>MRC Tropical Epidemiology Group, Department of Infectious Disease Epidemiology, London School  
31 of Hygiene and Tropical Medicine, London, United Kingdom  
32 17

33  
34 18 <sup>¶</sup>These authors contributed equally

35  
36  
37 19 **\*Correspondence:** Gyaviira Nkurunungi; [Gyaviira.Nkurunungi@mrcuganda.org](mailto:Gyaviira.Nkurunungi@mrcuganda.org)  
38  
39  
40  
41  
42  
43  
44  
45  
46  
47  
48  
49  
50  
51  
52  
53  
54  
55  
56  
57  
58  
59  
60

1  
2  
3 **20 Abstract**  
4

5 **21 Introduction**  
6

7  
8 Several licensed and investigational vaccines have lower efficacy, and induce impaired immune  
9  
10 responses, in low-income versus high-income countries and in rural, versus urban, settings.  
11  
12 Understanding these population differences is essential to optimising vaccine effectiveness in the  
13  
14 tropics. We suggest that repeated exposure to and immunomodulation by chronic helminth  
15  
16 infections partly explains population differences in vaccine response.  
17

16 **27 Methods and analysis**  
17

18  
19 We have designed an individually randomised, parallel group trial of intensive versus standard  
20  
21 praziquantel (PZQ) intervention against schistosomiasis, to determine effects on vaccine response  
22  
23 outcomes among school-going adolescents (9 to 17 years) from rural *Schistosoma mansoni* (*Sm*)-  
24  
25 endemic Ugandan islands. Vaccines to be studied comprise BCG on day 'zero'; yellow fever, oral  
26  
27 typhoid and Human Papilloma Virus (HPV) vaccines at week 4; and HPV and Tetanus/diphtheria  
28  
29 booster vaccine at week 28. The intensive arm will receive PZQ doses three times, each two weeks  
30  
31 apart, before BCG immunisation, followed by a dose at week 8 and quarterly thereafter. The  
32  
33 standard arm will receive PZQ at week 8 and week 52. We expect to enrol 480 participants, with 80%  
34  
35 *Sm* infected at the outset.  
36

37  
38 Primary outcomes are BCG-specific IFN- $\gamma$  ELISpot responses eight weeks after BCG immunisation and  
39  
40 for other vaccines, antibody responses to key vaccine antigens at four weeks after immunisation.  
41  
42 Secondary analyses will determine effects of intensive anthelmintic treatment on correlates of  
43  
44 protective immunity, on vaccine response waning, on priming vs boosting immunisations, and on *Sm*  
45  
46 infection status and intensity. Exploratory immunology assays using archived samples will enable  
47  
48 assessment of mechanistic links between helminths and vaccine responses.  
49

45 **43 Ethics and dissemination**  
46

47  
48 Ethics approval has been obtained from relevant Ugandan and UK ethics committees. Results will be  
49  
50 shared with Uganda Ministry of Health, relevant district councils, community leaders and study  
51  
52 participants. Further dissemination will be done through conference proceedings and publications.  
53

52 **47 Trial registration**  
53

54  
55 Current Controlled Trials identifier: ISRCTN60517191.  
56  
57  
58  
59  
60

1  
2  
3 50 **Article summary**  
4

5 51 *Strengths and limitations of this study*  
6

- 7 52
- 8 • This will be the first adequately powered intervention study to investigate effects of  
9 schistosomiasis treatment on vaccine responses in adolescents.  
10
  - 11 54 • Effects on both live-attenuated and inert vaccines will be studied.  
12
  - 13 55 • Our strong immunoepidemiological design and nested immunological studies will address  
14 56 specific hypotheses regarding pathways of effects.  
15
  - 16 57 • The sample archives developed will provide a major asset for exploration of new leads  
17 58 arising from this hypothesis-driven work, or for an alternative, “systems biology” approach  
18 59 investigating (for example) transcriptome, microbiome and virome.  
19
  - 20 60 • Even with intensive anthelmintic intervention, it may be difficult to “successfully” treat  
21 61 *Schistosoma* infection in our endemic setting due to re-infections; however, we still expect a  
22 62 substantial difference in intensity between the two trial arms.  
23  
24  
25  
26  
27

28 64 **Word count**

29 65 3250

30 66 **Keywords**

31 67 Vaccine; Schistosomiasis; Praziquantel; Immunization  
32  
33  
34  
35  
36  
37  
38  
39  
40  
41  
42  
43  
44  
45  
46  
47  
48  
49  
50  
51  
52  
53  
54  
55  
56  
57  
58  
59  
60

## 68 Introduction

69 Vaccine-specific immune responses are often impaired, and vaccine efficacy and effectiveness lower,  
70 in tropical low-income countries (LICs) compared to temperate high-income countries and in rural,  
71 compared to urban, LIC settings.<sup>1-8</sup> This has been recognised for both live vaccines (such as BCG,<sup>2,3,5,9</sup>  
72 polio,<sup>1</sup> yellow fever<sup>4</sup> vaccines) and non-live vaccines (such as influenza<sup>10</sup> and tetanus<sup>11</sup>).

73 Investigational malaria<sup>7</sup> and viral-vectored tuberculosis<sup>6</sup> and Ebola<sup>12</sup> vaccines are also affected.

74 Previous exposure to the target pathogen (or related organisms) may mask the benefit of the  
75 vaccine.<sup>13,14</sup> However, pre-vaccination exposure does not explain why Ebola trial vaccine-specific

76 responses differ between healthy UK and Senegalese adults,<sup>12</sup> as the target organism is rare.

77 Therefore, environmentally-dependent mechanisms may play an important role.<sup>5</sup>

78 A long-held hypothesis is that parasites, particularly helminths, modulate vaccine responses through

79 profound pre- and post-immunisation bystander effects on immunological activation and

80 regulation.<sup>15-17</sup> Helminths might also impact vaccines responses through interactions with the

81 complex ecosystem of mammalian gut bacteria, fungi, protozoa and viruses (the “trans-kingdom”

82 concept<sup>18</sup> detailed elsewhere in this journal [bmjopen-2020-040425]). Helminth-induced gut mucosa

83 damage, the associated translocation of microbial products into the systemic circulation<sup>19-21</sup> and

84 systemic immune activation or regulation mediated by microbial products might contribute to

85 modulation of responses to vaccines and other infections.

86 Helminth-mediated modulation of vaccine responses has not been substantiated in human

87 populations. No appropriately powered trials have been conducted to evaluate reversibility of their

88 effects. In animal models, helminths generally impair priming and accelerate waning of vaccine

89 responses, although effects vary with helminth species, vaccine type and the timing of infection and

90 immunisation.<sup>22</sup> Most observational studies in humans also suggest suppressed or biased responses

91 during helminth infection, especially during systemic infections, such as schistosomiasis and the

92 filariases. There is modest evidence that treating geohelminths in humans improves responses to

93 BCG<sup>23,24</sup> or oral cholera vaccine<sup>25</sup> and we found that schistosomiasis treatment improved the

94 measles-booster response in pre-school children.<sup>26</sup> There is therefore a strong case for a

95 comprehensive assessment of the effects of helminths and their treatment on vaccine responses.

96 The extent to which helminths and related “trans-kingdom” mediators causally and reversibly

97 impact immunological characteristics associated with vaccine responses may best be determined by

98 intervention studies. This trial protocol A of the ‘Population differences in Vaccine responses’

99 programme (POPVAC A; Current Controlled Trials identifier: ISRCTN60517191) has been designed to

100 evaluate the effect of *Schistosoma mansoni* and its treatment on vaccine responses. This study is

1  
2  
3  
4  
5  
6  
7  
8  
9  
10  
11  
12  
13  
14  
15  
16  
17  
18  
19  
20  
21  
22  
23  
24  
25  
26  
27  
28  
29  
30  
31  
32  
33  
34  
35  
36  
37  
38  
39  
40  
41  
42  
43  
44  
45  
46  
47  
48  
49  
50  
51  
52  
53  
54  
55  
56  
57  
58  
59  
60

101 one of three parallel trials whose designs and cross-cutting analyses are described separately in this  
102 journal (bmjopen-2020-040425, bmjopen-2020-040427 and bmjopen-2020-040430).

For peer review only

1  
2  
3 103 **Hypothesis**  
4

5 104 The overarching goal of the POPVAC programme is to understand population differences in vaccine  
6  
7 105 responses in Uganda, in order to identify strategies through which vaccine effectiveness can be  
8  
9 106 optimised for the low-income, tropical settings where they are especially needed. For this Trial A, we  
10  
11 107 focus on the hypothesis that *Schistosoma mansoni* infection suppresses responses to unrelated  
12  
13 108 vaccines; and that this effect can be reversed, at least in part, by intensive praziquantel treatment  
14  
15 109 intervention.

16 110 **Objective**

17  
18 111 To determine whether there are reversible effects of chronic *Schistosoma mansoni* infection on  
19  
20 112 vaccine response in adolescents, using an intervention study.  
21  
22  
23  
24  
25  
26  
27  
28  
29  
30  
31  
32  
33  
34  
35  
36  
37  
38  
39  
40  
41  
42  
43  
44  
45  
46  
47  
48  
49  
50  
51  
52  
53  
54  
55  
56  
57  
58  
59  
60

## 113 **Methods and analysis**

### 114 ***Setting and participants***

115 SPIRIT reporting guidelines<sup>27</sup> have been used. We will conduct an individually randomised, parallel  
116 group trial of intensive versus standard intervention against schistosomiasis (described below) in the  
117 *S. mansoni*-endemic Koome islands of Lake Victoria, Mukono district, Uganda.<sup>28</sup> We aim to enroll 480  
118 participants, randomising 240 to each intervention arm. The study cohort will recruit participants  
119 aged 9 to 17 years in primary school years 1 to 6. Adolescents<sup>29</sup> in this study setting bear a heavy  
120 parasite burden.<sup>30</sup> In addition, this age-group is a target group for vaccines against sexually  
121 transmitted infections (currently human papilloma virus [HPV] – in future, it is hoped, for vaccines  
122 against HIV) and for booster immunisations.

### 123 ***Recruitment criteria***

#### 124 *Inclusion criteria*

- 125 i. Attending the selected school and planning to continue to attend the school for the duration  
126 of the study
- 127 ii. Aged 9 to 17 years and enrolled in primary 1 to 6 (to avoid primary leaving examinations in  
128 late year 7, and loss to follow up of children leaving after primary 7)
- 129 iii. Written informed assent by participant and consent by parent or guardian
- 130 iv. Females agree to avoid pregnancy for the duration of the trial
- 131 v. Willing to provide locator information and to be contacted during the course of the trial
- 132 vi. Able and willing (in the investigator's opinion) to comply with all the study requirements

#### 133 *Exclusion criteria*

- 134 i. Clinically significant history of immunodeficiency (including HIV), cancer, cardiovascular  
135 disease, gastrointestinal disease, liver disease, renal disease, endocrine disorder and  
136 neurological illness
- 137 ii. History of serious psychiatric condition or disorder
- 138 iii. Moderate or severe acute illness characterised by any of the following symptoms: fever,  
139 impaired consciousness, convulsions, difficulty in breathing, vomiting; or as otherwise  
140 determined by the attending project clinician.
- 141 iv. Concurrent oral or systemic steroid medication or the concurrent use of other  
142 immunosuppressive agents within 2 months prior to enrolment
- 143 v. History of allergic reaction to immunisation or any allergy likely to be exacerbated by any  
144 component of the study vaccines including egg or chicken proteins

- 1  
2  
3 145 vi. History of previous immunisation with Yellow Fever (YF), oral typhoid or Human Papillomavirus  
4 146 (HPV) vaccine; previous immunisation with BCG or Tetanus and diphtheria vaccine (Td) at age  
5 147  $\geq 5$  years  
6  
7 148 vii. Tendency to develop keloid scars  
8  
9 149 viii. Haemoglobin less than 82g/L  
10  
11 150 ix. Positive HIV serology  
12  
13 151 x. Positive pregnancy test  
14  
15 152 xi. Female currently lactating, confirmed pregnancy or intention to become pregnant during the  
16 153 trial period  
17  
18 154 xii. Use of an investigational medicinal product or non-registered drug, live vaccine, or medical  
19 155 device other than the study vaccines for 30 days prior to dosing with the study vaccine, or  
20 156 planned use during the study period  
21  
22 157 xiii. Administration of immunoglobulins and/or any blood products within the three months  
23 158 preceding the planned trial immunisation date  
24  
25  
26

27 159 Further information on recruitment criteria can be found in Supplementary information.  
28

### 29 160 **Interventions**

30  
31 161 We will individually randomise participants to intensive or standard praziquantel (PZQ) treatment, in  
32 162 a 1:1 ratio. The intensive arm will receive three doses of PZQ (approximately 40mg/kg, assessed by  
33 163 height pole<sup>31</sup>) each two weeks apart prior to the first immunisation (the last of these 2-3 weeks before  
34 164 immunisation), followed by PZQ at 8 weeks (after primary endpoint sampling) and thereafter quarterly  
35 165 PZQ (approximately; timings adjusted to accommodate school terms) during follow up. The standard  
36 166 arm will receive their first dose of PZQ at week 8 (after immunisation and after primary endpoint  
37 167 sampling) and a second dose at week 52 (to conform to Uganda Ministry of Health policy, which is  
38 168 annual treatment) (**Figure 1**). No placebo will be used in this trial because all participants will be  
39 169 treated (albeit at different frequencies) and participants are unlikely to seek additional treatments  
40 170 outside the trial schedule: praziquantel treatment is not popular because of the recognised (although  
41 171 temporary) adverse effects (described in Supplementary information).  
42  
43  
44  
45  
46  
47  
48  
49

### 50 172 **Randomisation and allocation to treatment arm**

51  
52 173 A randomisation code will be generated by an independent statistician using a randomly permuted  
53 174 block size (sizes 4, 6, 8 and 10) and used to allocate participants to either receive quarterly PZQ  
54 175 (intensive arm) or annual PZQ (standard arm). A set of envelopes will be prepared, labelled  
55 176 sequentially with the randomisation numbers and containing a card indicating the corresponding  
56 177 allocation (to intensive or standard treatment). The randomisation code will be kept securely by the  
57  
58  
59  
60



178 trial statistician and made available only to those responsible for providing or preparing the trial  
 179 interventions. A second copy will be held by a data manager or statistician not otherwise involved in  
 180 the trial at the MRC/UVRI and LSHTM Uganda Research Unit. At enrolment, eligibility criteria will be  
 181 checked and eligible participants will be allocated sequentially to the next randomisation number  
 182 until the required sample size is achieved. Randomisation implementation will be done by a clinician  
 183 using the sequentially numbered opaque sealed envelopes. When the next randomisation number in  
 184 the sequence is allocated, the envelope bearing that number will be opened to reveal the allocation.

### 185 **Blinding**

186 Clinicians and participants will not be blinded to the treatment allocation since they will not  
 187 participate in outcome ascertainment; only immunology laboratory staff who are assessing trial  
 188 outcomes will be blinded.

### 189 **Immunisations**

190 We will study a portfolio of licensed vaccines (live and inert, oral and parental, priming and boosting)  
 191 expected to be beneficial (in some cases, already given) to adolescents in Uganda. Our schedule  
 192 (**Table 1**, supplementary **Table S1**) will comprise three main immunisation days (week 0, week 4 and  
 193 week 28). Additional HPV immunisation will be provided for girls aged 14 years or above, and a  
 194 second Tetanus/diphtheria boost will be given after completion of the study, to accord with the  
 195 national Expanded Programme on Immunisation (EPI) routines, but the response to these will not  
 196 specifically be assessed. Further rationale for the selection of vaccines is detailed in the  
 197 Supplementary information.

198

**Table 1. Immunisation schedule**

|                                                                                                                                                                                                                                                                                                                                                                                                                                                                                                                                        | Immunisation week 0                           | Immunisation week 4                           | [Immunisation week 8]                                   | Immunisation week 28                                      | [Immunisation week 52]                        |
|----------------------------------------------------------------------------------------------------------------------------------------------------------------------------------------------------------------------------------------------------------------------------------------------------------------------------------------------------------------------------------------------------------------------------------------------------------------------------------------------------------------------------------------|-----------------------------------------------|-----------------------------------------------|---------------------------------------------------------|-----------------------------------------------------------|-----------------------------------------------|
| <b>Live vaccines</b>                                                                                                                                                                                                                                                                                                                                                                                                                                                                                                                   | BCG vaccination / re-vaccination <sup>1</sup> | Yellow fever (YF-17D)<br>Oral typhoid (Ty21a) |                                                         |                                                           |                                               |
| <b>Non-live vaccines</b>                                                                                                                                                                                                                                                                                                                                                                                                                                                                                                               |                                               | HPV prime <sup>2</sup>                        | HPV boost for girls aged $\geq 14$ years <sup>3,4</sup> | HPV boost <sup>2</sup> and Tetanus/ diphtheria (Td) boost | Tetanus/ diphtheria (Td) boost <sup>4,5</sup> |
| 1. Prior BCG status may vary (data on history and documentation of prior BCG, and presence of a BCG scar, will be documented although these approaches have limitations for determining BCG status)<br>2. Both girls and boys will receive the HPV vaccine<br>3. The National EPI programme recommends three doses of HPV vaccine for older girls<br>4. These doses will be given to comply with guidelines but outcomes specifically relating to these doses will not be assessed<br>5. Priming by immunisation in infancy is assumed |                                               |                                               |                                                         |                                                           |                                               |

199

### 200 ***Schedule of immunisation and sampling***

201 The schedule of immunisation and sampling is outlined in **Figure 1** and **Table S1**. While optimal  
202 timings for outcome measures vary between vaccines, sampling at 8 weeks post BCG and 4 weeks  
203 post YF-17D, Ty21a, HPV and Td is proposed for the primary endpoints, targeting the establishment  
204 of memory responses and approximate peak of antibody responses. A secondary endpoint at one  
205 year will assess waning. All analyses will take baseline measurements into account. Immunisation  
206 postponement criteria are detailed in Supplementary information.

### 207 ***Outcomes***

#### 208 *Primary outcomes*

209 These will be assessed in all participants.

- 210 i. **BCG:** BCG-specific IFN- $\gamma$  ELISpot response eight weeks post BCG immunisation.
- 211 ii. **YF-17D:** neutralising antibody titres (plaque-reduction neutralisation test) at four weeks post  
212 YF immunisation.
- 213 iii. **Ty21a:** *Salmonella typhi* lipopolysaccharide (LPS)-specific immunoglobulin (Ig)G concentration  
214 at four weeks post Ty21a immunisation.
- 215 iv. **HPV:** IgG specific for L1-proteins of HPV-16/18 at four weeks post HPV priming immunisation.
- 216 v. **Td:** Tetanus and diphtheria toxoid-specific IgG concentration at four weeks post Td  
217 immunisation.

#### 218 *Secondary outcomes*

219 These will be assessed in all participants and will further investigate estimates of protective  
220 immunity (for vaccines where these are available) and dynamics of the vaccine responses, as well as  
221 the impact of the interventions on parasite clearance.

- 222 i. **Protective immunity.** Proportions with protective neutralising antibody (YF); protective IgG  
223 levels (TT);<sup>32</sup> seroconversion rates (Ty21a) at four weeks post the corresponding  
224 immunisation.
- 225 ii. **Response waning.** Primary outcome measures (all vaccines) repeated at week 52, and area-  
226 under-the curve (AUC) analyses. Parasitic infection may accelerate,<sup>33</sup> and anti-parasitic  
227 interventions delay, waning.
- 228 iii. **Priming versus boosting.** Effects on priming versus boosting will be examined for HPV only,  
229 comparing outcomes four weeks after the first, and four weeks after the second vaccine dose.

1  
2  
3 230 iv. **Current *S. mansoni* infection status and intensity** will be determined by serum/plasma levels  
4 231 of circulating anodic antigen (CAA). The method is quantitative, highly specific for *Schistosoma*  
5 232 infection, and much more sensitive than the conventional Kato Katz method.<sup>34</sup> CAA will be  
6 233 assessed retrospectively on stored samples collected at baseline, on immunisation days, and  
7 234 on primary and secondary endpoint days.

11  
12 235 Furthermore, our sample collection will offer opportunities for an array of exploratory  
13 236 immunological evaluations on stored samples, focusing mainly on vaccine antigen specific outcomes.  
14 237 Exploratory assays will provide further detail on the role of immunological profiles and trans-  
15 238 kingdom effects in mediating helminth modulation of vaccine-specific responses.

19 239 *Additional evaluation of parasite infection exposure*

- 21 240 i. **Prior exposure to schistosomiasis** will be evaluated by ELISA for IgG to schistosome egg  
22 241 antigen using stored blood samples collected at baseline.
- 23 242 ii. **The presence of other helminth infections** will be determined retrospectively using stool  
24 243 PCR of samples collected at baseline and at weeks 28 and 52.<sup>30</sup> In accordance with national  
25 244 guidelines, all participants will be treated with albendazole or mebendazole after collection  
26 245 of samples for primary endpoints at week 8 and 28, and after collection of samples for  
27 246 secondary endpoints at week 52.
- 28 247 iii. **Current malaria infection status and intensity** will be assessed retrospectively by PCR on  
29 248 stored samples collected on immunisation days and at week 52. Individuals presenting with  
30 249 fever will be investigated using rapid diagnostic tests for malaria and treated based on the  
31 250 results and according to prevailing national guidelines.
- 32 251 iv. **Prior malaria exposure** will be evaluated by ELISA for IgG to malaria antigen using stored  
33 252 samples collected at baseline.

34 253 *Sample size considerations*

35 254 Based on the literature<sup>4 35 36</sup> and preliminary data, we anticipate that, following log to base 10  
36 255 transformations that will be applied to normalise primary outcome measures, standard deviations  
37 256 (SDs) of primary outcome measures will lie between 0.3 and 0.6 on this log scale, and that effective  
38 257 treatment may increase responses by approximately 0.2 on the log scale (based on Tweyongyere *et*  
39 258 *al.*<sup>26</sup>). We have therefore powered our study to detect differences of this magnitude (0.2 on the log  
40 259 scale) or (in some cases) smaller (**Table 2**). We assume *S. mansoni* prevalence of  $\geq 80\%$ .

260 Based on these assumptions, we plan to include 480 participants in total (240 quarterly PZQ, 240  
 261 annual PZQ); of whom 384 are expected to be *S. mansoni* infected,<sup>28</sup> giving 192 participants in each  
 262 trial arm who are infected at baseline.

263 **Table 2** shows power estimates, for 5% significance level and assuming 20% loss to follow-up.

264

**Table 2. Power estimates (5% significance level)**

| Standard deviation (log <sub>10</sub> )                                                                                                                                                                                                                                                       | Difference in mean log <sub>10</sub> transformed outcome, between trial arms |      |      |      |      |      |      |
|-----------------------------------------------------------------------------------------------------------------------------------------------------------------------------------------------------------------------------------------------------------------------------------------------|------------------------------------------------------------------------------|------|------|------|------|------|------|
|                                                                                                                                                                                                                                                                                               | 0.08                                                                         | 0.10 | 0.12 | 0.14 | 0.16 | 0.18 | 0.20 |
| 192 intensive PZQ vs 192 standard PZQ ( <i>S. mansoni</i> infected only)                                                                                                                                                                                                                      |                                                                              |      |      |      |      |      |      |
| 0.3                                                                                                                                                                                                                                                                                           | 65%                                                                          | 83%  | 94%  | 98%  | >99% | >99% | >99% |
| 0.4                                                                                                                                                                                                                                                                                           | 42%                                                                          | 59%  | 75%  | 87%  | 94%  | 98%  | 99%  |
| 0.5                                                                                                                                                                                                                                                                                           | 29%                                                                          | 42%  | 56%  | 69%  | 80%  | 88%  | 94%  |
| 0.6                                                                                                                                                                                                                                                                                           | 21%                                                                          | 31%  | 42%  | 53%  | 65%  | 75%  | 83%  |
| Cells highlighted in grey correspond to >80% power; differences in mean log <sub>10</sub> transformed outcome of 0.08, 0.10, 0.12, 0.14, 0.16, 0.18 and 0.20 are equivalent to geometric mean ratios for untransformed outcomes of 1.20, 1.26, 1.32, 1.38, 1.45, 1.51 and 1.59, respectively. |                                                                              |      |      |      |      |      |      |

265

### 266 ***Ethics and dissemination***

267 Ethical approval has been granted from the Research Ethics Committee of the Uganda Virus  
 268 Research Institute (UVRI REC, reference: GC/127/19/05/664) and the London School of Hygiene and  
 269 Tropical Medicine (LSHTM, reference: 16032), and from the Uganda National Council for Science and  
 270 Technology (UNCST, reference: HS2486) and the Uganda National Drug Authority (NDA, reference:  
 271 CTA0093). Any protocol amendments will be submitted to ethics committees and regulatory bodies  
 272 for approval before implementation.

273 Participants are adolescents and therefore a vulnerable human population. Care will be taken to  
 274 provide adequate, age and education-status appropriate information and to ensure that it is  
 275 understood; and to emphasise that participation is voluntary. Participants will be enrolled only when  
 276 they have given their own assent and when consent has been given by the parent or guardian. No  
 277 major risks to the participants are anticipated since all the treatments and vaccines to be given are  
 278 licensed and known to be safe. The main risk to participants will be time lost from school work: we  
 279 will work with teachers and parents to minimise disruption to classes, and will avoid enrolment of  
 280 primary 7 students since these classes are involved in national examinations. Further risks are  
 281 discussed in Supplementary information.

282 Study findings will be published through open access peer-reviewed journals, presentations at local,  
 283 national and international conferences and to the local community through community meetings.  
 284 Anonymised participant level datasets generated will be available upon request.

1  
2  
3 285 ***Patient and public involvement***  
4

5 286 Concepts involved in this work have been discussed with colleagues at the Vector Control Division  
6  
7 287 and Expanded Programme on Immunisation in the Ministry of Health (Uganda), with the Mukono  
8  
9 288 District Council and with community leaders and Village Health Teams from Koome subcounty. We  
10  
11 289 also have held meetings to explain the proposed work to teachers, parents, participants and village  
12  
13 290 members, and to address their questions about issues such as study length, the study's ethical  
14  
15 291 approval status, why adults were excluded from the study, and to explain to them why boys will also  
16  
17 292 receive the HPV vaccine. Study findings will be shared with these stakeholders and with participants.

18 293 ***Data management and analysis***

19  
20 294 Socio-demographic information and clinical and laboratory measurements will be recorded and  
21  
22 295 managed using Research Electronic Data Capture (REDCap) tools,<sup>37 38</sup> with paper-based forms as  
23  
24 296 back-up. All data will be recorded under a unique study ID number. When paper forms must be  
25  
26 297 used, data will be double entered in a study-specific database, with standard checks for  
27  
28 298 discrepancies. All data for analysis will be anonymised and stored on a secure and password-  
29  
30 299 protected server, with access limited to essential research personnel.

31  
32 300 Baseline characteristics will be summarised by trial arm, and the effect of intensive (compared to  
33  
34 301 standard) praziquantel treatment on the outcomes will be analysed. Information on infection status  
35  
36 302 will only be available after randomisation. The primary analysis will be done on individuals identified  
37  
38 303 as infected at baseline (through randomisation, these will be balanced between treatment arms);  
39  
40 304 this will test the hypothesis that treating the infection (and subsequent reinfections) reverses the  
41  
42 305 parasite's effects on vaccine responses. If treating *S. mansoni* reverses adverse parasite effects on  
43  
44 306 vaccine responses, this may be a beneficial public health intervention. However, routine screening  
45  
46 307 for parasite infection before immunisation would be laborious. Secondary analyses will include all  
47  
48 308 randomised individuals; this will provide insight into the broader benefit of the interventions as  
49  
50 309 public health measures. The effect of intensive versus standard praziquantel treatment on primary  
51  
52 310 outcomes will be assessed using unpaired t-tests, with results presented as a mean difference in  
53  
54 311 vaccine response measure together with 95% confidence interval and p-value. We anticipate that  
55  
56 312 outcomes will be positively skewed, and will apply log transformations to normalise distributions  
57  
58 313 before analysis if required. The detailed analytical plan is available on the online trial registration site  
59  
60 314 (<http://www.isrctn.com/ISRCTN60517191>).

## 315 Discussion

316 This will be the first adequately powered intervention study to investigate the effect of  
317 schistosomiasis treatment on vaccine responses in adolescents. This study will determine whether *S.*  
318 *mansoni* infection has a causal, reversible, impact on the response to live or inert vaccines, including  
319 effects on vaccine replication, immune response profile, priming, boosting and waning. The results  
320 will add to understanding of population differences in vaccine responses and on interventions that  
321 may enhance responses. If treating helminths improves vaccine responses in adolescents, combined  
322 parasite-control/immunisation programmes offer an attractive, practical public health intervention  
323 for schools and communities.

324 There are risks associated with our approach to addressing the trial objective. **First**, there is a risk of  
325 failure to clear *S. mansoni* infections, and repeated reinfection during the trial. This issue can be  
326 challenging because of incomplete cure or maturation of immature worms after treatment, and  
327 lifestyles in endemic communities that result in repeated exposure. To mitigate this, we will  
328 administer three PZQ treatments over a six-week period before the first immunisations, and  
329 continuing quarterly treatment in the intensive arm. **Second**, there is a risk that *S. mansoni* infection  
330 has long-term effects, not removed by treatment, mediated, for example, by epigenetic change.<sup>39</sup>  
331 However, studies show that parasite treatment results in immunological changes,<sup>40,41</sup> and our data  
332 suggest at least partial recovery of the measles vaccine response among young children treated for  
333 schistosomiasis.<sup>26</sup> By initiating intervention six to eight weeks before the first immunisations, and  
334 providing repeated intervention in the intensive arms, we hope to achieve significant resolution of *S.*  
335 *mansoni* effects.

336 We are interested in the effects of removing *S. mansoni*. Treating parasites can induce acute  
337 immunological change due to release of previously hidden antigens.<sup>42,43</sup> To minimise such effects,  
338 immunisations will be given at least 2 weeks after PZQ (the longest practicable interval; **Figure 1**).

339 Laboratory analyses will also highlight immune parameters and cellular populations that link  
340 environmental exposures to vaccine responses. Identifying processes associated with poor or good  
341 outcomes will inform strategies in vaccine design (for example, the genetic modification of vaccines,  
342 or innovative use of adjuvants, to counter any adverse immunological milieu, currently an area of  
343 intense research for cancer vaccines<sup>44</sup>); ultimately supporting the development of effective vaccines  
344 tailored to the low-income settings that most need them.

345

## 346 Study timeline

1  
2  
3 347 Applications for ethical approval were submitted in May 2018, with approval received in September  
4  
5 348 2018 (Uganda Virus Research Institute Research Ethics Committee), May 2019 (National Drug  
6  
7 349 Authority and Uganda National Council for Science and Technology), June 2019 (London School of  
8  
9 350 Hygiene and Tropical Medicine). Collaborator/investigator/trial steering committee meetings were  
10  
11 351 also held during the initial 12-month planning period. The study began recruitment in July 2019.  
12  
13 352 Intervention will be up to 12 months, with completion of the project scheduled for September 2020.  
14

15 353

### 16 354 **Competing interests**

17  
18 355 Alison Elliott reports a grant from the Medical research Council, UK (POPVAC programme funding).  
19  
20 356 The rest of the authors declare that they have no conflicts of interest.

### 21 357 **Author contributions**

22  
23  
24 358 AME conceived the study. AME, GN, ELW, AN, JN, SC, LZ and JK contributed to study design. LZ, GO,  
25  
26 359 PNK, EN, GK, RA, CN, CO, MN, CZ, SA and FA are site clinicians/nurses/clinical laboratory technicians  
27  
28 360 providing valuable input on clinical considerations of the intervention. MS, SK and RK are field  
29  
30 361 workers handling the organisational integration of the intervention. AN, AM and ELW are involved in  
31  
32 362 organisation of the databases, trial randomization, treatment allocation and drawing up of analytical  
33  
34 363 plans. GN, LZ, JN, AN, SC, ELW and AME drafted the manuscript. All authors reviewed the  
35  
36 364 manuscript, contributed to it and approved the final version.

### 36 365 **Acknowledgements**

37  
38  
39 366 We thank the Uganda National Expanded Programme for Immunisation, Sanofi Pasteur and PaxVax  
40  
41 367 for providing the HPV, yellow fever and oral typhoid vaccines, respectively. The BCG and tetanus-  
42  
43 368 diphtheria vaccines were kind donations from the Serum Institute of India. We thank the Vector  
44  
45 369 Control Division of the Ministry of Health and the Mukono district local government for their  
46  
47 370 support. We also thank members of the POPVAC programme steering committee (chaired by Prof.  
48  
49 371 Richard Hayes) and the Data and Safety Monitoring Board (Dr David Meya, Prof Andrew Prendergast  
50  
51 372 and Dr Elizabeth George).

### 51 373 **Funding**

52  
53 374 The POPVAC programme of work is supported by the Medical Research Council of the United  
54  
55 375 Kingdom (grant number MR/R02118X/1). SC and JN are supported in part by the Makerere  
56  
57 376 University – Uganda Virus Research Institute Centre of Excellence for Infection and Immunity  
58  
59 377 Research and Training (MUII-plus). MUII-plus is funded under the DELTAS Africa Initiative. The  
60  
61 378 DELTAS Africa Initiative is an independent funding scheme of the African Academy of Sciences (AAS),



1  
2  
3 379 Alliance for Accelerating Excellence in Science in Africa (AESAs) and supported by the New  
4 380 Partnership for Africa's Development Planning and Coordinating Agency (NEPAD Agency) with  
5 381 funding from the Wellcome Trust (grant 107743) and the UK Government. The MRC/UVRI and  
6 382 LSHTM Uganda Research Unit is jointly funded by the UK Medical Research Council (MRC) and the  
7 383 UK Department for International Development (DFID) under the MRC/DFID Concordat agreement  
8 384 and is also part of the EDCTP2 programme supported by the European Union.

9  
10 385 The study sponsor (London School of Hygiene and Tropical Medicine) and funders had no role in  
11 386 study design; collection, management, analysis, and interpretation of data; writing of the protocol;  
12 387 and the decision to submit the protocol for publication.

13  
14  
15  
16  
17  
18  
19 388 **POPVAC trial team**

20  
21 389 **Principal investigator:** Alison Elliott; **Project leader:** Ludoviko Zirimenya; **laboratory staff:** Gyaviira  
22 390 Nkurunungi, Stephen Cose, Rebecca Amongin, Beatrice Nassanga, Jacent Nassuuna, Irene Nambuya,  
23 391 Prossy Kabuubi, Emmanuel Niwagaba, Gloria Oduru, Grace Kabami; **statisticians and data**  
24 392 **managers:** Emily Webb, Agnes Natukunda, Helen Akurut, Alex Mutebe; **clinicians:** Anne Wajja, Milly  
25 393 Namutebi, Christopher Zziwa, Joel Serubanja; **nurses:** Caroline Onen, Esther Nakazibwe, Josephine  
26 394 Tumusiime, Caroline Ninsiima, Susan Amongi, Florence Akello; **internal monitor:** Mirriam  
27 395 Akello; **field workers:** Robert Kizindo, Moses Sewankambo, Denis Nsubuga, Samuel Kiwanuka, Fred  
28 396 Kiwudhu; **boatman:** David Abiriga; **administrative management:** Moses Kizza, Samsi Nansukusa;  
29 397 **internal and external collaborators:** Pontiano Kaleebu, Hermelijn Smits, Maria Yazdanbakhsh,  
30 398 Govert van Dam, Paul Corstjens, Sarah Staedke, Henry Luzze, James Kaweesa, Edridah Tukahebwa,  
31 399 Elly Tumushabe, Moses Muwanga  
32  
33  
34  
35  
36  
37  
38  
39  
40  
41  
42  
43  
44  
45  
46  
47  
48  
49  
50  
51  
52  
53  
54  
55  
56  
57  
58  
59  
60



400 **References**

- 401 1. Taniuchi M, Platts-Mills JA, Begum S, et al. Impact of enterovirus and other enteric pathogens on oral polio  
402 and rotavirus vaccine performance in Bangladeshi infants. *Vaccine* 2016;34(27):3068-75. doi:  
403 10.1016/j.vaccine.2016.04.080 [published Online First: 2016/05/08]
- 404 2. Fine PE. Variation in protection by BCG: implications of and for heterologous immunity. *Lancet*  
405 1995;346(8986):1339-45.
- 406 3. Black GF, Weir RE, Floyd S, et al. BCG-induced increase in interferon-gamma response to mycobacterial  
407 antigens and efficacy of BCG vaccination in Malawi and the UK: two randomised controlled studies. *Lancet*  
408 2002;359(9315):1393-401. doi: 10.1016/S0140-6736(02)08353-8
- 409 4. Muyanja E, Ssemaganda A, Ngauv P, et al. Immune activation alters cellular and humoral responses to  
410 yellow fever 17D vaccine. *The Journal of clinical investigation* 2014;124(7):3147-58. doi: 10.1172/jci75429  
411 [published Online First: 2014/06/10]
- 412 5. Barreto ML, Pilger D, Pereira SM, et al. Causes of variation in BCG vaccine efficacy: examining evidence from  
413 the BCG REVAC cluster randomized trial to explore the masking and the blocking hypotheses. *Vaccine*  
414 2014;32(30):3759-64. doi: 10.1016/j.vaccine.2014.05.042
- 415 6. Tanner R, Kakalacheva K, Miller E, et al. Serum indoleamine 2,3-dioxygenase activity is associated with  
416 reduced immunogenicity following vaccination with MVA85A. *BMC infectious diseases* 2014;14:660. doi:  
417 10.1186/s12879-014-0660-7 [published Online First: 2014/12/04]
- 418 7. Sissoko MS, Healy SA, Katile A, et al. Safety and efficacy of PfSPZ Vaccine against *Plasmodium falciparum* via  
419 direct venous inoculation in healthy malaria-exposed adults in Mali: a randomised, double-blind phase 1 trial.  
420 *The Lancet Infectious diseases* 2017;17(5):498-509. doi: 10.1016/s1473-3099(17)30104-4 [published Online  
421 First: 2017/02/22]
- 422 8. Venkatraman N, Ndiaye BP, Bowyer G, et al. Safety and Immunogenicity of a Heterologous Prime-Boost  
423 Ebola Virus Vaccine Regimen in Healthy Adults in the United Kingdom and Senegal. *The Journal of infectious*  
424 *diseases* 2018;219(8):1187-97. doi: 10.1093/infdis/jiy639
- 425 9. Barreto ML, Pereira SM, Pilger D, et al. Evidence of an effect of BCG revaccination on incidence of  
426 tuberculosis in school-aged children in Brazil: second report of the BCG-REVAC cluster-randomised trial.  
427 *Vaccine* 2011;29(31):4875-7. doi: 10.1016/j.vaccine.2011.05.023
- 428 10. van Riet E, Adegnikaa AA, Retra K, et al. Cellular and humoral responses to influenza in gabonese children  
429 living in rural and semi-urban areas. *The Journal of infectious diseases* 2007;196(11):1671-8. doi:  
430 10.1086/522010 [published Online First: 2007/11/17]
- 431 11. van Riet E, Retra K, Adegnikaa AA, et al. Cellular and humoral responses to tetanus vaccination in Gabonese  
432 children. *Vaccine* 2008;26(29-30):3690-5. doi: 10.1016/j.vaccine.2008.04.067 [published Online First:  
433 2008/06/10]
- 434 12. Venkatraman N, Ndiaye BP, Bowyer G, et al. Safety and Immunogenicity of a Heterologous Prime-Boost  
435 Ebola Virus Vaccine Regimen in Healthy Adults in the United Kingdom and Senegal. *The Journal of infectious*  
436 *diseases* 2019;219(8):1187-97. doi: 10.1093/infdis/jiy639
- 437 13. Brandt L, Feino Cunha J, Weinreich Olsen A, et al. Failure of the *Mycobacterium bovis* BCG vaccine: some  
438 species of environmental mycobacteria block multiplication of BCG and induction of protective immunity to  
439 tuberculosis. *Infection and immunity* 2002;70(2):672-8. [published Online First: 2002/01/18]
- 440 14. Flaherty DK, Vesosky B, Beamer GL, et al. Exposure to *Mycobacterium avium* can modulate established  
441 immunity against *Mycobacterium tuberculosis* infection generated by *Mycobacterium bovis* BCG vaccination.

- 1  
2  
3 442 *Journal of leukocyte biology* 2006;80(6):1262-71. doi: 10.1189/jlb.0606407 [published Online First:  
4 443 2006/09/14]  
5  
6 444 15. Maizels RM, McSorley HJ. Regulation of the host immune system by helminth parasites. *The Journal of*  
7 445 *allergy and clinical immunology* 2016;138(3):666-75. doi: 10.1016/j.jaci.2016.07.007 [published Online First:  
8 446 2016/08/02]  
9  
10 447 16. Wammes LJ, Mpairwe H, Elliott AM, et al. Helminth therapy or elimination: epidemiological,  
11 448 immunological, and clinical considerations. *The Lancet Infectious diseases* 2014;14(11):1150-62. doi:  
12 449 10.1016/S1473-3099(14)70771-6  
13  
14 450 17. Wammes LJ, Hamid F, Wiria AE, et al. Regulatory T cells in human geohelminth infection suppress immune  
15 451 responses to BCG and *Plasmodium falciparum*. *Eur J Immunol* 2010;40(2):437-42. doi: 10.1002/eji.200939699  
16  
17 452 18. Pfeiffer JK, Virgin HW. Viral immunity. Transkingdom control of viral infection and immunity in the  
18 453 mammalian intestine. *Science* 2016;351(6270) doi: 10.1126/science.aad5872  
19  
20 454 19. Onguru D, Liang Y, Griffith Q, et al. Human schistosomiasis is associated with endotoxemia and Toll-like  
21 455 receptor 2- and 4-bearing B cells. *The American journal of tropical medicine and hygiene* 2011;84(2):321-4.  
22 456 doi: 10.4269/ajtmh.2011.10-0397 [published Online First: 2011/02/05]  
23  
24 457 20. George PJ, Anuradha R, Kumar NP, et al. Evidence of microbial translocation associated with perturbations  
25 458 in T cell and antigen-presenting cell homeostasis in hookworm infections. *PLoS neglected tropical diseases*  
26 459 2012;6(10):e1830. doi: 10.1371/journal.pntd.0001830 [published Online First: 2012/10/12]  
27  
28 460 21. Rajamanickam A, Munisankar S, Bhootra Y, et al. Microbial Translocation Associated with an Acute-Phase  
29 461 Response and Elevations in MMP-1, HO-1, and Proinflammatory Cytokines in *Strongyloides stercoralis*  
30 462 Infection. *Infection and immunity* 2017;85(1) doi: 10.1128/iai.00772-16 [published Online First: 2016/11/09]  
31  
32 463 22. Sanya RE, Nkurunungi G, Andia Biraro I, et al. A life without worms. *Transactions of the Royal Society of*  
33 464 *Tropical Medicine and Hygiene* 2017:1-9. doi: 10.1093/trstmh/trx010 [published Online First: 2017/03/25]  
34  
35 465 23. Elias D, Britton S, Aseffa A, et al. Poor immunogenicity of BCG in helminth infected population is associated  
36 466 with increased in vitro TGF-beta production. *Vaccine* 2008;26(31):3897-902. doi: S0264-410X(08)00540-9  
37 467 [pii]  
38 468 10.1016/j.vaccine.2008.04.083 [published Online First: 2008/06/17]  
39  
40 469 24. Elias D, Wolday D, Akuffo H, et al. Effect of deworming on human T cell responses to mycobacterial  
41 470 antigens in helminth-exposed individuals before and after bacille Calmette-Guerin (BCG) vaccination. *Clin Exp*  
42 471 *Immunol* 2001;123(2):219-25.  
43  
44 472 25. Cooper PJ, Chico ME, Losonsky G, et al. Albendazole treatment of children with ascariasis enhances the  
45 473 vibriocidal antibody response to the live attenuated oral cholera vaccine CVD 103-HgR. *The Journal of*  
46 474 *infectious diseases* 2000;182(4):1199-206. doi: 10.1086/315837 [published Online First: 2000/09/09]  
47  
48 475 26. Tweyongyere R, Nassanga BR, Muhwezi A, et al. Effect of *Schistosoma mansoni* infection and its treatment  
49 476 on antibody responses to measles catch-up immunisation in pre-school children: A randomised trial. *PLoS*  
50 477 *neglected tropical diseases* 2019;13(2):e0007157. doi: 10.1371/journal.pntd.0007157 [published Online First:  
51 478 2019/02/15]  
52  
53 479 27. Chan AW, Tetzlaff JM, Altman DG, et al. SPIRIT 2013 statement: defining standard protocol items for  
54 480 clinical trials. *Ann Intern Med* 2013;158(3):200-7. doi: 10.7326/0003-4819-158-3-201302050-00583  
55 481 [published Online First: 2013/01/09]  
56  
57 482 28. Sanya RE, Nkurunungi G, Hoek Spaans R, et al. The Impact of Intensive Versus Standard Anthelmintic  
58 483 Treatment on Allergy-related Outcomes, Helminth Infection Intensity, and Helminth-related Morbidity in  
59 484 Lake Victoria Fishing Communities, Uganda: Results From the LaVIISWA Cluster-randomized Trial. *Clinical*

- 1  
2  
3 485 *infectious diseases : an official publication of the Infectious Diseases Society of America* 2019;68(10):1665-74.  
4 486 doi: 10.1093/cid/ciy761 [published Online First: 2018/09/12]  
5  
6 487 29. WHO. Adolescent Health Research Priorities: Report of a Technical Consultation 2015.  
7 488 [http://apps.who.int/iris/bitstream/10665/203564/1/WHO\\_FWC\\_MCA\\_15\\_07\\_eng.pdf?ua=1](http://apps.who.int/iris/bitstream/10665/203564/1/WHO_FWC_MCA_15_07_eng.pdf?ua=1) (accessed 17th  
8 489 May 2019).  
9  
10 490 30. Webb EL, Nampijja M, Kaweesa J, et al. Helminths are positively associated with atopy and wheeze in  
11 491 Ugandan fishing communities: results from a cross-sectional survey. *Allergy* 2016 doi: 10.1111/all.12867  
12  
13 492 31. Montresor A, Odermatt P, Muth S, et al. The WHO dose pole for the administration of praziquantel is also  
14 493 accurate in non-African populations. *Transactions of the Royal Society of Tropical Medicine and Hygiene*  
15 494 2005;99(1):78-81. doi: 10.1016/j.trstmh.2004.06.006  
16  
17 495 32. Plotkin SA. Correlates of protection induced by vaccination. *Clinical and vaccine immunology : CVI*  
18 496 2010;17(7):1055-65. doi: 10.1128/cvi.00131-10 [published Online First: 2010/05/14]  
19  
20 497 33. Riner DK, Ndombi EM, Carter JM, et al. Schistosoma mansoni Infection Can Jeopardize the Duration of  
21 498 Protective Levels of Antibody Responses to Immunizations against Hepatitis B and Tetanus Toxoid. *PLoS*  
22 499 *neglected tropical diseases* 2016;10(12):e0005180. doi: 10.1371/journal.pntd.0005180  
23  
24 500 34. Corstjens PL, Nyakundi RK, de Dood CJ, et al. Improved sensitivity of the urine CAA lateral-flow assay for  
25 501 diagnosing active Schistosoma infections by using larger sample volumes. *Parasites & vectors* 2015;8:241.  
26 502 doi: 10.1186/s13071-015-0857-7 [published Online First: 2015/04/22]  
27  
28 503 35. Fletcher HA, Snowden MA, Landry B, et al. T-cell activation is an immune correlate of risk in BCG vaccinated  
29 504 infants. *Nat Commun* 2016;7:11290. doi: 10.1038/ncomms11290  
30  
31 505 36. Safaeian M, Porras C, Pan Y, et al. Durable antibody responses following one dose of the bivalent human  
32 506 papillomavirus L1 virus-like particle vaccine in the Costa Rica Vaccine Trial. *Cancer prevention research*  
33 507 *(Philadelphia, Pa)* 2013;6(11):1242-50. doi: 10.1158/1940-6207.capr-13-0203 [published Online First:  
34 508 2013/11/06]  
35  
36 509 37. Harris PA, Taylor R, Minor BL, et al. The REDCap Consortium: Building an International Community of  
37 510 Software Platform Partners. *Journal of biomedical informatics* 2019;103208. doi: 10.1016/j.jbi.2019.103208  
38 511 [published Online First: 2019/05/13]  
39  
40 512 38. Harris PA, Taylor R, Thielke R, et al. Research electronic data capture (REDCap)--a metadata-driven  
41 513 methodology and workflow process for providing translational research informatics support. *Journal of*  
42 514 *biomedical informatics* 2009;42(2):377-81. doi: 10.1016/j.jbi.2008.08.010 [published Online First:  
43 515 2008/10/22]  
44  
45 516 39. Blok BA, Arts RJ, van Crevel R, et al. Trained innate immunity as underlying mechanism for the long-term,  
46 517 nonspecific effects of vaccines. *J Leukoc Biol* 2015;98(3):347-56. doi: 10.1189/jlb.5RI0315-096R  
47  
48 518 40. Watanabe K, Mwinzi PN, Black CL, et al. T regulatory cell levels decrease in people infected with  
49 519 Schistosoma mansoni on effective treatment. *The American journal of tropical medicine and hygiene*  
50 520 2007;77(4):676-82. [published Online First: 2007/11/06]  
51  
52 521 41. Schmiedel Y, Mombo-Ngoma G, Labuda LA, et al. CD4+CD25hiFOXP3+ Regulatory T Cells and Cytokine  
53 522 Responses in Human Schistosomiasis before and after Treatment with Praziquantel. *PLoS neglected tropical*  
54 523 *diseases* 2015;9(8):e0003995. doi: 10.1371/journal.pntd.0003995 [published Online First: 2015/08/21]  
55  
56 524 42. van den Biggelaar AHJ, Borrmann S, Kremsner P, et al. Immune Responses Induced by Repeated Treatment  
57 525 Do Not Result in Protective Immunity to Schistosoma haematobium: Interleukin (IL)-5 and IL-10 Responses.  
58 526 *The Journal of infectious diseases* 2002;186(10):1474-82. doi: 10.1086/344352  
59  
60

- 1  
2  
3 527 43. Woolhouse MEJ, Hagan P. Seeking the ghost of worms past. *Nature Medicine* 1999;5(11):1225-27. doi:  
4 528 10.1038/15169  
5  
6 529 44. Seledtsov VI, Goncharov AG, Seledtsova GV. Clinically feasible approaches to potentiating cancer cell-based  
7 530 immunotherapies. *Human vaccines & immunotherapeutics* 2015;11(4):851-69. doi:  
8 531 10.1080/21645515.2015.1009814 [published Online First: 2015/05/02]  
9 532

10  
11  
12 533

13  
14  
15 534 **FIGURE LEGENDS**

16  
17 535 **Figure 1. Outline of immunisations and anthelmintic intervention**

18  
19 536 <sup>1</sup>Primary endpoints will be at eight weeks post BCG and four weeks post Yellow fever (YF-17D), oral  
20 537 typhoid (Ty21a), Human Papilloma Virus (HPV) and Tetanus/diphtheria (Td) vaccination.

21  
22 538 <sup>2</sup>Primary endpoint for responses to Td given at 28 weeks.  
23

24 539  
25  
26  
27  
28  
29  
30  
31  
32  
33  
34  
35  
36  
37  
38  
39  
40  
41  
42  
43  
44  
45  
46  
47  
48  
49  
50  
51  
52  
53  
54  
55  
56  
57  
58  
59  
60

1  
2  
3  
4  
5  
6  
7  
8  
9  
10  
11  
12  
13  
14  
15  
16  
17  
18  
19  
20  
21  
22  
23  
24  
25

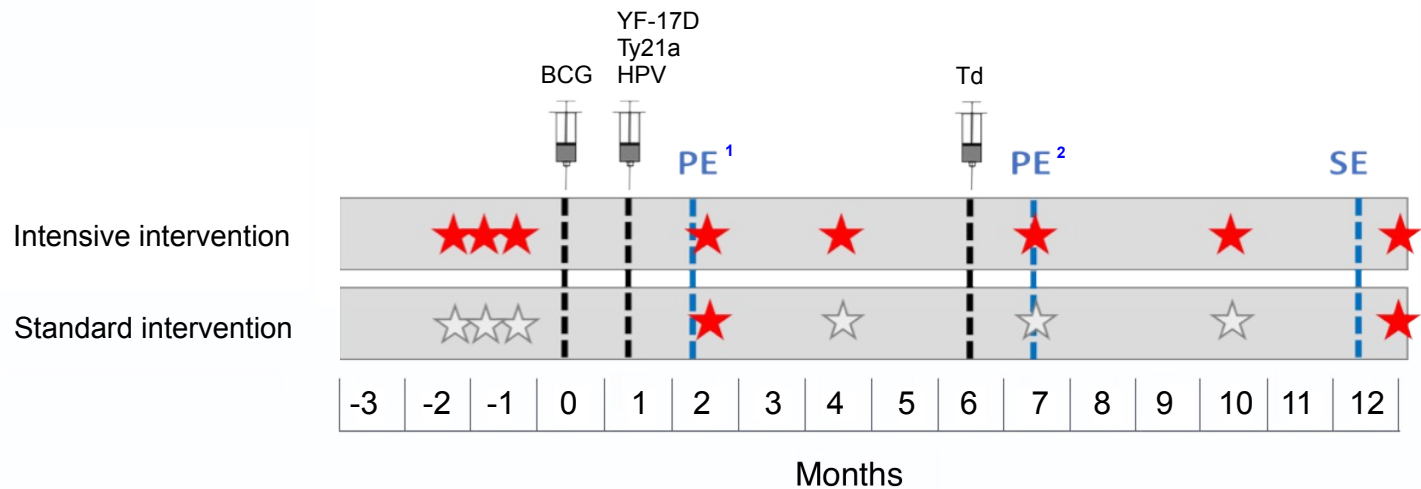

 praziquantel;  - - - immunisations; **PE** - - - - primary endpoint; **SE** - - - - secondary endpoint  
 standard arm, no praziquantel

1  
2  
3 **SUPPLEMENTARY INFORMATION**  
4

5  
6  
7  
8 **The effect of intensive treatment for schistosomiasis on immune responses to vaccines among**  
9 **rural Ugandan island adolescents: randomised controlled trial protocol A for the ‘POPulation**  
10 **differences in VACCine responses’ (POPVAC) programme**  
11

12 Gyaviira Nkurunungi<sup>1,¶,\*</sup>, Ludoviko Zirimenya<sup>1,¶</sup>, Jacent Nassuuna<sup>1,¶</sup>, Agnes Natukunda<sup>1,¶</sup>, Prossy N  
13 Kabuubi<sup>1</sup>, Emmanuel Niwagaba<sup>1</sup>, Gloria Oduru<sup>1</sup>, Grace Kabami<sup>1</sup>, Rebecca Amongin<sup>1</sup>, Alex Mutebe<sup>1</sup>,  
14 Milly Namutebi<sup>1</sup>, Christopher Zziwa<sup>1</sup>, Susan Amongi<sup>1</sup>, Caroline Ninsiima<sup>1</sup>, Caroline Onen<sup>1</sup>, Florence  
15 Akello<sup>1</sup>, Moses Sewankambo<sup>1</sup>, Samuel Kiwanuka<sup>1</sup>, Robert Kizindo<sup>1</sup>, James Kaweesa<sup>2</sup>, Stephen Cose<sup>1,3</sup>,  
16 Emily L Webb<sup>4</sup>, Alison M Elliott<sup>1,3</sup> for the POPVAC trial team  
17  
18  
19  
20  
21

22  
23  
24 <sup>1</sup>Immunomodulation and Vaccines Programme, Medical Research Council/Uganda Virus Research  
25 Institute and London School of Hygiene and Tropical Medicine (MRC/UVRI and LSHTM) Uganda  
26  
27 Research Unit, Entebbe, Uganda  
28

29 <sup>2</sup>Vector Control Division, Ministry of Health, Kampala, Uganda  
30

31 <sup>3</sup>Department of Clinical Research, London School of Hygiene and Tropical Medicine, London, United  
32 Kingdom  
33

34 <sup>4</sup>MRC Tropical Epidemiology Group, Department of Infectious Disease Epidemiology, London School  
35 of Hygiene and Tropical Medicine, London, United Kingdom  
36  
37

38 <sup>¶</sup>These authors contributed equally  
39

40 **\*Correspondence:** Gyaviira Nkurunungi; [Gyaviira.Nkurunungi@mrcuganda.org](mailto:Gyaviira.Nkurunungi@mrcuganda.org)  
41  
42  
43  
44  
45  
46  
47  
48  
49  
50  
51  
52  
53  
54  
55  
56  
57  
58  
59  
60

Table S1. Schedule of visits and procedures

| VISIT NUMBER                                                                                                                                  | 1               | 2 & 3                     | 4             | 5 <sup>9</sup> | 5.2             | 6                                    | 7       | 8             | 9                                       | 10      | 11                |
|-----------------------------------------------------------------------------------------------------------------------------------------------|-----------------|---------------------------|---------------|----------------|-----------------|--------------------------------------|---------|---------------|-----------------------------------------|---------|-------------------|
| WEEKS FROM 1 <sup>ST</sup> IMMUNISATION                                                                                                       | -8 <sup>1</sup> | -6 <sup>10</sup> , -4, -2 | 0             | 4              | 4 weeks +4 days | 8                                    | 20      | 28            | 32                                      | 44      | 52                |
|                                                                                                                                               | Screening       | Treatment (Rx) only       | Immunisations | Immunisations  |                 | Primary Endpoint (PE), Immunisations | Rx only | Immunisations | PE/Secondary Endpoint (SE) <sup>2</sup> | Rx only | SE, Immunisations |
| <b>RANDOMISED INTENSIVE VS STANDARD PRAZIQUANTEL INTERVENTION</b>                                                                             |                 |                           |               |                |                 |                                      |         |               |                                         |         |                   |
| PZQ intensive arm (x)                                                                                                                         |                 | x                         |               |                |                 | x <sup>3</sup>                       | x       |               | x <sup>3</sup>                          | x       | x <sup>3</sup>    |
| PZQ standard arm                                                                                                                              |                 |                           |               |                |                 | x <sup>3</sup>                       |         |               |                                         |         | x <sup>3</sup>    |
| Albendazole                                                                                                                                   |                 |                           |               |                |                 | x <sup>3</sup>                       |         |               | x <sup>3</sup>                          |         | x <sup>3</sup>    |
| <b>VACCINES</b>                                                                                                                               |                 |                           |               |                |                 |                                      |         |               |                                         |         |                   |
| BCG                                                                                                                                           |                 |                           | x             |                |                 |                                      |         |               |                                         |         |                   |
| YF-17D                                                                                                                                        |                 |                           |               | x              |                 |                                      |         |               |                                         |         |                   |
| Ty21a                                                                                                                                         |                 |                           |               | x              |                 |                                      |         |               |                                         |         |                   |
| HPV                                                                                                                                           |                 |                           |               | x              |                 | [x] <sup>4</sup>                     |         | x             |                                         |         |                   |
| Td                                                                                                                                            |                 |                           |               |                |                 |                                      |         | x             |                                         |         | [x] <sup>5</sup>  |
| <b>INVESTIGATIONS/PROCEDURES</b>                                                                                                              |                 |                           |               |                |                 |                                      |         |               |                                         |         |                   |
| Inclusion/exclusion criteria                                                                                                                  | x               |                           |               |                |                 |                                      |         |               |                                         |         |                   |
| Informed consent                                                                                                                              | x               |                           |               |                |                 |                                      |         |               |                                         |         |                   |
| Questionnaire                                                                                                                                 | x               |                           | x             | x              | x               | x                                    |         | x             | x                                       |         | x                 |
| Examination                                                                                                                                   | x               |                           | (x)           | (x)            | (x)             | (x)                                  |         | (x)           | (x)                                     |         | (x)               |
| Urine β-HCG test (female only) 1mL                                                                                                            | x               |                           | x             | x              |                 |                                      |         | x             |                                         |         |                   |
| Urine YF viral load                                                                                                                           |                 |                           |               |                | x               |                                      |         |               |                                         |         |                   |
| Stool for PCR and storage                                                                                                                     | x               |                           |               |                |                 |                                      |         | x             |                                         |         | x                 |
| Stool for coproantibody and storage                                                                                                           | x               |                           |               |                |                 | x                                    |         |               |                                         |         |                   |
| <b>BLOOD SAMPLES</b>                                                                                                                          |                 |                           |               |                |                 |                                      |         |               |                                         |         |                   |
| Malaria PCR (1ml)                                                                                                                             |                 |                           | x             | x              |                 |                                      |         | x             |                                         |         | x                 |
| Serology for HIV, prior malaria and <i>S. mansoni</i> (0.5ml)                                                                                 | x               |                           |               |                |                 |                                      |         |               |                                         |         |                   |
| Mansonella perstans (1ml)                                                                                                                     | x               |                           |               |                |                 |                                      |         |               |                                         |         |                   |
| Serum/plasma CAA (1ml)                                                                                                                        | x               |                           | x             | x              |                 | x                                    |         | x             | x                                       |         | x                 |
| Hb <sup>8</sup> / Full blood count (0.5ml)                                                                                                    | x               |                           | x             | x              |                 |                                      |         | x             |                                         |         |                   |
| Assessments of pre-immunisation responses, and/or vaccine response outcomes and/or exploratory immunology; storage <sup>7</sup> (10 – 20 mls) |                 |                           | x             | x              |                 | x                                    |         | x             | x                                       |         | x                 |
| Blood for gene expression (2mls)                                                                                                              |                 |                           | x             | x              |                 |                                      |         | x             |                                         |         |                   |
| Blood vol (mL)                                                                                                                                | 4               |                           | 27            | 17             |                 | 10-20                                |         | 27            | 10                                      |         | 14                |
| Cumulative blood vol (mL) <sup>7</sup>                                                                                                        | 4               |                           | 31            | 48             |                 | 68                                   |         | 95            | 105                                     |         | 119               |

1  
2  
3 **PE:** primary endpoint; **SE:** secondary endpoint; **Rx only:** treatment only

4 Immunisation days highlighted in green, primary end point days in red, days for treatment only in grey

5 (x) performed if clinically indicated

6 1. Screening and enrolment into Project A will take place about 8 weeks before immunisation 0 to allow initiation of the praziquantel intervention.

7 2. Week 32 is primary endpoint for responses to Td given at 28 weeks; secondary endpoint for HPV booster

8 3. Treatments given after sampling when schedules coincide

9 4. Week 8 HPV dose will be given for previously-unvaccinated girls aged  $\geq 14$  years

10 5. Week 52 Td booster dose will be provided as a service

11 6. Exploratory immunology blood volume will be guided by guidelines from Harvard Mass General, where a maximum of 3ml/kg body weight is taken at any one time point and not more than 3ml/kg is taken over any 8-week period (ref [http://www.drgreene.com/21\\_1616.html](http://www.drgreene.com/21_1616.html).) These guidelines have been followed in a previous study vaccinating adolescents with investigational tuberculosis vaccine MVA85A (in Uganda).<sup>1</sup> The total blood volume planned is 68 ml over the initial intensive sampling period of 8 weeks. Revision of sample volumes based on weight will only be required for participants who weigh less than 22 kg; the average weight of children aged 9 years is expected to be 28kg (with 21kg the 3rd centile) with greater weights for older children.<sup>2</sup>

12 7. At baseline, it will only be Hb estimation by Haemocue

13 8. Oral typhoid vaccine doses will be administered on three alternate days namely visit 5, 5.1 and 5.2.

14 9. The first PZQ treatment at week -6 will be administered at the end of the screening visit

15  
16 22



### 23 **Further information on recruitment criteria**

- 24 • Participants who are excluded from the trial because they have been discovered (during  
25 screening procedures) to be suffering from a previously undiagnosed condition thought to  
26 require further medical attention will be referred appropriately for further investigation and  
27 treatment.
- 28 • Participants discovered to have severe anaemia will be excluded from the trial and treated  
29 for anaemia
- 30 • Participants discovered to be HIV-positive will be counselled and offered a CD4 T-cell count  
31 and referred to a provider of antiretroviral treatment (“Test and Treat” – i.e. initiation of  
32 treatment regardless of CD4 count is recommended for these high-risk communities).
- 33 • Participants discovered to be pregnant will be counselled and referred to an antenatal clinic  
34 of their choice.

35 This trial proposes to recruit all participants within a short time-frame. It will not, therefore, be  
36 possible to reconsider enrolment of potential participants with temporary exclusion criteria after  
37 treatment and resolution of the condition.

### 38 **Further rationale for the selection of vaccines**

#### 39 *Bacillus Calmette–Guérin (BCG)*

40 BCG is a live, replicating parenteral vaccine, and the only licensed vaccine against TB. The BCG  
41 vaccine for these studies will be obtained from the Serum Institute of India either directly, or  
42 through a supplier in Uganda. The Serum Institute of India provides much of the BCG vaccine used  
43 in Uganda.

44 Worldwide, TB is among the top 10 causes of death; Uganda has an estimated incidence of  
45 202/100,000 people.<sup>3</sup> Infectious, sputum positive, pulmonary TB classically emerges in adolescence,  
46 driving the on-going epidemic.<sup>4</sup> Thus adolescent booster immunisation is a key TB control strategy.<sup>5</sup>  
47 However, BCG vaccine response and efficacy are often impaired in tropical and rural settings<sup>6-8</sup> and  
48 new TB vaccines are similarly affected.<sup>9</sup> In the past, the WHO has been hesitant to recommend BCG  
49 re-vaccination. However, in 2017 WHO’s Strategic Advisory Group of Experts (SAGE) recommended:  
50 “Further research is warranted to explore whether certain sub-groups of age, geographic or *M.*  
51 *tuberculosis* exposure categories would benefit from re-vaccination.”<sup>10</sup> Recent results suggest that,  
52 despite the variability of BCG efficacy between populations, BCG vaccination in adolescence offers  
53 benefit in some tropical settings, especially for individuals who are not yet infected with  
54 *Mycobacterium tuberculosis*, and may also be cost-effective.<sup>7,11</sup> Also, BCG vaccine is currently being  
55 used among adolescents in South Africa as a comparator in a trial of a novel TB vaccine (trial

1  
2  
3 56 registration NCT02075203). BCG efficacy in Ugandan adolescents, and differences in BCG vaccine  
4  
5 57 responses between urban and rural Ugandan populations, have not been tested. Information  
6  
7 58 obtained from this study is expected to further inform the use of BCG in adolescents, and also to  
8  
9 59 inform the development of new vaccines for tuberculosis.

#### 10 60 *Yellow fever vaccine*

11  
12 61 Yellow fever vaccine YF-17D is a live replicating parenteral vaccine. The vaccine (Stamaril; Sanofi  
13  
14 62 Pasteur) is available for purchase in Uganda. Yellow Fever (YF) causes outbreaks in Uganda and the  
15  
16 63 wider region<sup>12</sup> and YF-17D is a candidate for Uganda's expanded programme on immunisation (EPI).  
17  
18 64 Lower vaccine replication, lower neutralising antibody induction, and greater waning, are described  
19  
20 65 in Uganda compared to Switzerland.<sup>13</sup> YF-17D is a potential vector for novel vaccine constructs,<sup>14</sup>  
21  
22 66 adding relevance to vaccine development.

#### 23 67 *Typhoid vaccine Ty21a*

24  
25 68 Typhoid vaccine Ty21a is a live replicating oral vaccine and also a potential vector for new vaccine  
26  
27 69 constructs.<sup>15</sup> The Ty21a vaccine will be purchased from PaxVax, Redwood City, California.  
28  
29 70 Substantial, multi-year typhoid outbreaks occur in Uganda and immunisation campaigns have been  
30  
31 71 advocated as cost effective.<sup>16</sup> Schistosomiasis has been associated with prolonged *S. typhi* infection<sup>17</sup>  
32  
33 72 and impaired antibody responses to killed typhoid vaccines.<sup>18</sup>

34  
35 73 Ty21a was developed in the 1970s. Although not routinely used in Uganda, it has been (and is  
36  
37 74 currently) registered in many countries. It was first registered in the United States and United  
38  
39 75 Kingdom in the 1980s, and is recommended by the WHO for both endemic and epidemic settings.<sup>19</sup>  
40  
41 76 It has comparable efficacy to the parenteral Vi polysaccharide typhoid vaccine, good durability and  
42  
43 77 minimal adverse effects.<sup>19</sup> It is proposed for use in this study to model effects of study exposures  
44  
45 78 and intervention on the response to a live oral vaccine.

46  
47 79 The Ty21a vaccine is given as a three-dose regimen on alternate days.

#### 48 80 *Human Papilloma Virus (HPV) vaccine*

49  
50 81 The Human Papilloma Virus (HPV) vaccine is a protein virus-like particle. The quadrivalent HPV  
51  
52 82 Vaccine Gardasil (Merck) is available for purchase in Uganda and is the vaccine used by the national  
53  
54 83 EPI programme. Studies after three vaccine doses have found somewhat enhanced responses in the  
55  
56 84 presence of malaria, but no effect of helminths.<sup>20</sup> No study has previously investigated parasite  
57  
58 85 effects on the priming response, but recent results for tetanus suggest that priming may be more  
59  
60 86 susceptible than boosting to adverse effects.<sup>21</sup> This will be important if forthcoming trials support  
87  
88 89 single-dose HPV immunisation (NCT02834637). HPV immunisation is being rolled out among girls to

1  
2  
3 88 prevent cervical neoplasia, the most common cancer among Ugandan women and we will  
4  
5 89 coordinate provision with the national HPV immunisation programme.<sup>22</sup> HPV immunisation is also  
6  
7 90 beneficial for boys since HPV infection is associated with anogenital warts, anal cancer and  
8  
9 91 oropharyngeal cancers in both males and females, and with penile cancer in men,<sup>23</sup> and we will  
10  
11 92 include boys in these studies.

### 12 93 *Tetanus and diphtheria vaccines*

14 94 Tetanus and diphtheria (Td) vaccines comprise inert toxoids. Schistosomiasis is associated with a Th2  
15  
16 95 biased response to tetanus toxoid<sup>24</sup> and with suppressed antibody responses among those with low  
17  
18 96 pre-immunisation antibody levels.<sup>21</sup> Booster immunisation is recommended for young women to  
19  
20 97 prevent maternal and neonatal tetanus. Recent evidence emphasises the need to protect young  
21  
22 98 men also.<sup>25</sup>

### 23 99 ***Immunisation Postponement Criteria***

25 100 If any one of the following is identified at the time scheduled for immunisation, the participant may  
26  
27 101 be immunised at a later date, or withdrawn, at the discretion of the Investigator. The participant  
28  
29 102 must be followed until resolution of the event as with any adverse event:

- 31 103 • Acute disease at the time of immunisation. Acute disease is defined as the presence of a  
32  
33 104 moderate or severe illness with or without fever. All vaccines can be administered to persons  
34  
35 105 with a minor illness such as diarrhoea or mild upper respiratory infection with or without low-  
36  
37 106 grade fever, i.e. temperature of  $\leq 37.5^{\circ}\text{C}$  ( $99.5^{\circ}\text{F}$ )
- 38 107 • Temperature of  $>37.5^{\circ}\text{C}$  ( $99.5^{\circ}\text{F}$ ) at the time of immunisation
- 40 108 • Taking antibiotics or antimalarials currently, or within the past 7 days, of the date of Ty21a  
41  
42 109 administration (ascertained verbally)

### 44 110 ***Vaccine storage and transport***

46 111 In order to maintain a reliable vaccine cold chain, the vaccines and diluents to be used will be stored  
47  
48 112 and transported within the recommended temperature range of  $+2^{\circ}\text{C}$  to  $+8^{\circ}\text{C}$ . Care will be taken to  
49  
50 113 ensure that the vaccines are not frozen. BCG, being sensitive to light, will be kept in the dark  
51  
52 114 (normally within its secondary packaging) for as long as possible to protect it during storage and  
53  
54 115 transportation. All vaccines will be kept in appropriate refrigeration equipment with a temperature  
55  
56 116 monitoring device to ensure temperatures remain between  $+2^{\circ}\text{C}$  and  $+8^{\circ}\text{C}$ . Cold boxes/vaccines  
57  
58 117 carriers with temperature monitors will be used to transport vaccines and the diluents from the  
59  
60 118 MRC/UVRI and LSHTM Uganda Research Unit (Entebbe) to Koome island and while transporting  
60 119 vaccines to immunisation sessions. Designated staff will be given responsibility for managing the

1  
2  
3 120 vaccine cold chain. All cold chain equipment including the temperature monitoring devices used for  
4  
5 121 this project will comply with relevant technical specifications as defined by the EPI standards. Basic  
6  
7 122 routine maintenance will be regularly carried out on all cold chain equipment.

### 8 9 123 ***Additional laboratory measurements***

10  
11 124 Additional assays will comprise HIV serology, pregnancy testing and full blood counts. HIV testing  
12  
13 125 and pregnancy testing will be accompanied by appropriate counselling by trained staff.

- 14  
15 126 • HIV serology will be done on blood samples using rapid tests and according to prevailing  
16  
17 127 national algorithms.<sup>26</sup> This will be done at baseline.
- 18  
19 128 • Pregnancy testing will be done using urine samples and standard operating procedures for  
20  
21 129 assessment of urine  $\beta$ -human chorionic gonadotropin ( $\beta$ hCG). This will be done at baseline  
22  
23 130 and before immunisation on each immunisation day.
- 24  
25 131 • Full blood counts will be conducted using a haematology analyser. Mild, moderate and  
26  
27 132 severe anaemia will be defined according to WHO guidelines, by age.<sup>27</sup> This will be done at  
28  
29 133 baseline to test for anaemia as part of the eligibility assessment, and pre-immunisation as  
30  
31 134 part of the assessment of immunological profile.

32  
33 135 Individuals found to be HIV positive or pregnant will be referred to appropriate providers for further  
34  
35 136 care. Individuals with severe anaemia (haemoglobin <82g/L) will be excluded from the randomised  
36  
37 137 intervention (since the intervention might be beneficial in management of anaemia). They will be  
38  
39 138 treated for anaemia.

### 40 41 139 ***Sample handling and archive***

42  
43 140 Blood and other samples will be processed according to local laboratory standard operating  
44  
45 141 procedures (SOPs). All samples will reach the laboratory in anonymised form.

46  
47 142 A sample archive will be developed. Although our current programme of work will address specific  
48  
49 143 hypotheses regarding pathways of effects of parasites and interventions, the sample archive will  
50  
51 144 provide a major asset for exploration of new leads arising from this work, or for an alternative,  
52  
53 145 “systems biology” approach employing (for example) proteomic, genomic, epigenetic and  
54  
55 146 transcriptomic analyses, and investigating the microbiome and virome. Information provided to  
56  
57 147 participants, and consent forms, will include considerations of sample storage, and the possibility of  
58  
59 148 sample analysis in laboratories within and outside Uganda. Participants will be able to decide if they  
60  
149 will permit such future use of any leftover samples. We plan to store the samples for up to 20 years.  
150  
151 If further storage is needed after that time, permission will be requested from the Uganda Virus  
Research Institute and London School of Hygiene and Tropical Medicine ethical review committees.

1  
2  
3 152 If they elect not to permit this, all of those leftover samples will be discarded after the completion of  
4  
5 153 the work included in the current protocol.

6  
7 154 ***Operational considerations***

8  
9 155 *Programme governance*

10  
11 156 A Programme Steering Committee has been set up to guide progress across all projects. This  
12  
13 157 comprises the following:

- 14  
15 158 • An independent chair  
16  
17 159 • Representatives from the Ministry of Health programmes for immunisation and for vector  
18  
19 160 borne disease control  
20  
21 161 • Representatives of district authorities (Mukono and Jinja districts)  
22  
23 162 • Community representatives  
24  
25 163 • Principal investigator and co-investigators  
26  
27 164 • Project leader and post-doctoral immunologist  
28  
29 165 • Trial statistician  
30  
31 166 • Laboratory manager  
32  
33 167 • Medical Research Council observer

34  
35 168 *Informed consent*

36  
37 169 Both written informed assent from the participants and written informed consent from a parent or  
38  
39 170 guardian will be required for participation, although these may not necessarily be obtained at the  
40  
41 171 same time. Information will be provided in both English and the appropriate local language. For  
42  
43 172 individuals who cannot speak the languages used, or who cannot read or write, a witness who can  
44  
45 173 read the information sheet and translate the information to the participant or parent/guardian will  
46  
47 174 be used. Two different types of age specific assent forms will be used for the group of participants  
48  
49 175 aged 9 – 12 years and for the group aged 13 – 17 years. Informed consent by emancipated or mature  
50  
51 176 minors will be obtained using a designated consent form for these categories of participants.

52  
53 177 The aims of the study, all tests, treatments and immunisations to be carried out and potential risks  
54  
55 178 will be explained. The participant will be given the opportunity to ask about details of the trial, and  
56  
57 179 will then have time to consider whether or not to participate. If they do decide to participate, they  
58  
59 180 and their parent/guardian will sign and date two copies of the assent and consent forms, one for  
60  
181 them to take away and keep, and one to be stored securely by the research team. Separate  
182  
information and consent forms will be provided (i) for consent for storage of samples for future

1  
2  
3 183 studies and for anonymous sharing of data from this study and (ii) for possible genetic studies; the  
4  
5 184 information sheet will explain that these data may be used in analyses related to this protocol.  
6

7 185 *Screening and Eligibility Assessment*  
8

9 186 Once the informed consent process has been completed, and consent (and assent) given, a baseline  
10  
11 187 medical history (including concomitant medication) will be collected. Vital signs will be checked and  
12  
13 188 a physical examination will be performed. Inclusion and exclusion criteria will be checked.

14  
15 189 Participants will undergo pre- and post-test counselling for HIV and (for girls) pregnancy testing by a  
16  
17 190 trained and experienced nurse- or clinician-counsellor. Blood, urine and stool samples will be  
18  
19 191 obtained, for tests as specified in the schedule of procedures. These tests are to exclude the major,  
20  
21 192 immunomodulating co-infection, HIV, and conditions that might impact safety (anaemia,  
22  
23 193 pregnancy).

24 194 *Enrolment*

25  
26 195 Participants who consent/assent, complete the screening processes, satisfy all the inclusion criteria  
27  
28 196 and meet none of the exclusion criteria will be enrolled.

29  
30 197 *Discontinuation/withdrawal criteria*

31  
32 198 In accordance with the principles of the current revision of the Declaration of Helsinki and any other  
33  
34 199 applicable regulations, a participant has the right to withdraw from the study at any time and for any  
35  
36 200 reason, and is not obliged to give his or her reasons for doing so. The Investigator may withdraw the  
37  
38 201 participant at any time in the interests of the participant's health and well-being. In addition, the  
39  
40 202 participant may withdraw/be withdrawn for any of the following reasons:

- 41 203
- 42 204 • Ineligibility (either arising during the study or retrospectively, having been overlooked at  
43 screening)
  - 44 205 • Administrative decision by the Investigator
  - 45 206 • Significant protocol deviation
  - 46 207 • Participant non-compliance with study requirements
  - 47 208 • An adverse event which requires discontinuation of the study involvement or results in  
48 inability to continue to comply with study procedures.
- 49  
50  
51 209

52  
53 210 Any participant who becomes pregnant during the trial will be followed up until the end of the  
54  
55 211 pregnancy but no further immunisations will be given unless indicated during pregnancy (as is the  
56  
57 212 case for tetanus toxoid). The trial allocation for this participant will be unblinded and the participant  
58  
59 213 will only be given further treatment if clinically indicated. The babies will also be followed up and  
60

1  
2  
3 214 examined for any adverse effects. We will not routinely perform venepuncture in a pregnant  
4  
5 215 participant.

6  
7 216 The reason for withdrawal will be recorded in the case report form (CRF). If withdrawal is due to an  
8  
9 217 AE, appropriate follow-up visits or medical care will be arranged, with the agreement of the  
10  
11 218 participant, until the AE has resolved, stabilised or a non-trial related causality has been assigned.

12  
13 219 If a participant withdraws from the study samples collected before their withdrawal from the trial  
14  
15 220 will be used/ stored unless the participant specifically requests otherwise.

16 221 *Trial discontinuation*

17  
18 222 The trial will be discontinued in the event of new scientific information that renders continuation  
19  
20 223 futile or unethical, or for any other reason, at the discretion of the Programme Steering Committee.

21  
22 224 *End of study definition*

23  
24 225 The trial will be completed when the last participant enrolled into the trial has completed their final  
25  
26 226 follow up visit.

27  
28 227 *Safety assessments and oversight*

29  
30 228 No new investigational drug or product will be used in the proposed trial. However, standard  
31  
32 229 approaches for monitoring safety and reporting of serious adverse events will be followed.

33  
34 230 *Monitoring*

35  
36 231 The trial will be monitored by both internal and external monitors according to a pre-defined  
37  
38 232 monitoring plan which will include a site initiation visit, monitoring visits at least annually, and a  
39  
40 233 close-out visit. The monitors will assess patient safety, data integrity, and adherence to the protocol  
41  
42 234 and to Good Clinical Research Practice procedures.

43  
44 235 ***Considerations regarding standard of care***

45  
46 236 *S. mansoni* infection status will be determined retrospectively through assays conducted in bulk on  
47  
48 237 stored samples (plasma CAA). These results will not, therefore, be useful to determine management  
49  
50 238 of individual participants.

51 239 Participants in the standard treatment arm will receive lower levels of anthelmintic treatment.

52 240 However, all trial arms will receive a minimum of well-implemented national standard of care.

53  
54 241 Standard of care will comprise annual praziquantel treatment. Our own results from the Lake

55  
56 242 Victoria Island Intervention Study on Worms and Allergy-related diseases (LaVIISWA),<sup>28</sup> which

57  
58 243 compared annual versus quarterly intervention for schistosomiasis at community level over three  
59  
60



1  
2  
3 244 years, showed no advantage of quarterly treatment for morbidity outcomes attributed to  
4  
5 245 schistosomiasis.  
6  
7 246 Schistosomiasis can cause anaemia. To manage the expected differential benefits of the  
8  
9 247 interventions for anaemia, a full blood count will be performed at baseline, as discussed above;  
10  
11 248 anaemic children will be managed appropriately and severely anaemic children excluded.  
12  
13 249 Albendazole will be provided twice a year to manage nematode infections (after collection of  
14  
15 250 primary and secondary endpoint samples).

### 16 251 ***Procedures to be followed in the event of abnormal findings***

17  
18 252 Abnormal clinical findings from medical history, examination or blood tests will be assessed as to  
19  
20 253 their clinical significance throughout the trials. If an abnormal test result is deemed clinically  
21  
22 254 significant, it may be repeated. If a test remains clinically significant, the participant will be informed  
23  
24 255 and appropriate medical care arranged as appropriate and with the permission of the participant.  
25  
26 256 Specific details regarding findings, discussion with participants and resulting actions will be recorded  
27  
28 257 in the clinical records. Decisions to exclude the participant from enrolling in the trial or to withdraw  
29  
30 258 a participant from the trial will be at the discretion of the Investigator.

### 31 259 ***Data and Safety Monitoring Board (DSMB)***

32  
33 260 A data and safety monitoring board (DSMB) has been appointed to provide real-time safety  
34  
35 261 oversight. The DSMB will be notified within 7 days of the Investigators' being aware of the  
36  
37 262 occurrence of SAEs. The DSMB may recommend the Investigators to place the trial on hold if  
38  
39 263 deemed necessary following an intervention-related SAE. The DSMB will be chaired by a clinician  
40  
41 264 experienced in clinical trials. There will be a minimum of two other appropriately qualified  
42  
43 265 committee members. In the case of events related to a blinded intervention, the DSMB can request  
44  
45 266 unblinding. Membership will include a statistician, and at least one Ugandan member. All  
46  
47 267 correspondence between Investigators and the DSMB will be conveyed by the Principal Investigator  
48  
49 268 to the trial Sponsor. The Chair of the DSMB will be contacted for advice and independent review by  
50  
51 269 the Investigator or trial Sponsor in the following situations:

- 52 270 • The occurrence of any SAE
- 53 271 • Any other situation where the Investigator or trial Sponsor feels independent advice or
- 54 272 review is important

### 55 273 ***Ethical and regulatory considerations***

56  
57  
58 274 *Further information regarding risks*  
59  
60



1  
2  
3 275 The immunisations to be given have recognised side effects which are usually mild and resolve  
4  
5 276 spontaneously in a few days to one week. Parenteral vaccines are likely to result in pain and  
6  
7 277 swelling at the site of injection and mild fever; very occasionally pain and swelling can be severe and  
8  
9 278 associated with difficulty in moving the shoulder. Sometimes headache and tiredness occur. Rarely  
10  
11 279 a vaccine may cause a severe allergic reaction. For most vaccines this is estimated at less than one  
12  
13 280 in a million doses (but 1 in 55,000 for Yellow Fever vaccine).<sup>29</sup> Individuals with a history of a  
14  
15 281 possible allergic reaction to drugs or vaccines, or to vaccine components including eggs or chicken  
16  
17 282 proteins, will be excluded from the studies. The research team will be trained and prepared to  
18  
19 283 manage severe allergic reactions.

20  
21 284 Adverse reactions to Yellow Fever vaccine include severe nervous system reaction (about 1 person in  
22  
23 285 125,000) and severe, life-threatening illness with organ failure (about 1 person in 250,000). The  
24  
25 286 mortality for this severe, life-threatening adverse effect is reported as about 50%.<sup>29</sup>

26  
27 287 BCG immunisation is likely to induce a scar in many cases. This may develop over several weeks,  
28  
29 288 starting as a small papule at the injection site which may become ulcerated and then heal over a  
30  
31 289 period of 2 to 5 months; and lymphadenopathy may develop. Occasionally a more severe local  
32  
33 290 reaction occurs (estimated at 1 per 1,000-10,000 doses): for example, an abscess develops and scars  
34  
35 291 may develop into keloids. Rarely BCG can cause disseminated disease (1 per 230,000 to 640,000  
36  
37 292 doses), or disease in sites remote from the immunisation site. Disseminated BCG disease usually  
38  
39 293 occurs in immunocompromised people: HIV positive people will be excluded from these studies.<sup>30</sup>  
40  
41 294 BCG "pre-immunisation" may interfere with the response to the subsequent live vaccines; indeed  
42  
43 295 our hypothesis, and published results, suggest that it may suppress replication of YF 17D vaccine.<sup>31</sup>  
44  
45 296 However, this reduced replication has not been shown to correlate with, or result in, reduced levels  
46  
47 297 of neutralising antibody titres (which are the desired protective outcome).<sup>13 31</sup>

48  
49 298 Oral typhoid vaccine (Ty21a) may occasionally be associated with stomach pain, nausea, vomiting  
50  
51 299 and (rarely) rash.<sup>29</sup>

52  
53 300 Praziquantel has been in use for about 30 years. It has a well-recognised profile of side effects  
54  
55 301 including dizziness, nausea, vomiting, abdominal pain, diarrhoea (sometimes with blood) and  
56  
57 302 urticarial rash. The symptoms are considered to arise largely from the effects of killing worms and to  
58  
59 303 be more severe in people with heavy infections. Symptoms are better tolerated when the drugs are  
60  
304 given after food and we will provide treatment after a meal or snack. Simple medications, such as  
305 paracetamol and cetirizine, can alleviate symptoms and these will be available on treatment days.

306 **References**

- 1  
2  
3  
4  
5  
6 307 1. Wajja A, Kizito D, Nassanga B, et al. The effect of current *Schistosoma mansoni* infection on the  
7 308 immunogenicity of a candidate TB vaccine, MVA85A, in BCG-vaccinated adolescents: An open-label trial.  
8 309 *PLoS neglected tropical diseases* 2017;11(5):e0005440. doi: 10.1371/journal.pntd.0005440 [published Online  
9 310 First: 2017/05/05]
- 10  
11 311 2. WHO. Growth reference 5-19 years. 2007
- 12  
13 312 3. WHO. Global tuberculosis report 2016 [http://www.who.int/tb/publications/global\\_report/en/](http://www.who.int/tb/publications/global_report/en/) (accessed 17  
14 313 June 2017), 2016.
- 15  
16 314 4. Alcais A, Fieschi C, Abel L, et al. Tuberculosis in children and adults: two distinct genetic diseases. *J Exp Med*  
17 315 2005;202(12):1617-21. doi: 10.1084/jem.20052302
- 18  
19 316 5. Weiner J, 3rd, Kaufmann SH. Recent advances towards tuberculosis control: vaccines and biomarkers. *J*  
20 317 *Intern Med* 2014;275(5):467-80. doi: 10.1111/joim.12212
- 21  
22 318 6. Fine PE. Variation in protection by BCG: implications of and for heterologous immunity. *Lancet (London,*  
23 319 *England)* 1995;346(8986):1339-45.
- 24  
25 320 7. Barreto ML, Pilger D, Pereira SM, et al. Causes of variation in BCG vaccine efficacy: examining evidence from  
26 321 the BCG REVAC cluster randomized trial to explore the masking and the blocking hypotheses. *Vaccine*  
27 322 2014;32(30):3759-64. doi: 10.1016/j.vaccine.2014.05.042
- 28  
29 323 8. Black GF, Weir RE, Floyd S, et al. BCG-induced increase in interferon-gamma response to mycobacterial  
30 324 antigens and efficacy of BCG vaccination in Malawi and the UK: two randomised controlled studies. *Lancet*  
31 325 *(London, England)* 2002;359(9315):1393-401. doi: 10.1016/S0140-6736(02)08353-8
- 32  
33 326 9. Tanner R, Kakalacheva K, Miller E, et al. Serum indoleamine 2,3-dioxygenase activity is associated with  
34 327 reduced immunogenicity following vaccination with MVA85A. *BMC infectious diseases* 2014;14:660. doi:  
35 328 10.1186/s12879-014-0660-7 [published Online First: 2014/12/04]
- 36  
37 329 10. WHO. SAGE Evidence to recommendations framework. 2017.  
38 330 [http://www.who.int/immunization/sage/meetings/2017/october/2](http://www.who.int/immunization/sage/meetings/2017/october/2_EvidencetoRecommendationFramework_BCG.pdf) [EvidencetoRecommendationFramework](http://www.who.int/immunization/sage/meetings/2017/october/2_EvidencetoRecommendationFramework_BCG.pdf)  
39 331 [\\_BCG.pdf](http://www.who.int/immunization/sage/meetings/2017/october/2_EvidencetoRecommendationFramework_BCG.pdf) (accessed 16th March 2018).
- 40  
41 332 11. Dye C. Making wider use of the world's most widely used vaccine: Bacille Calmette-Guerin revaccination  
42 333 reconsidered. *Journal of the Royal Society, Interface* 2013;10(87):20130365. doi: 10.1098/rsif.2013.0365  
43 334 [published Online First: 2013/08/02]
- 44  
45 335 12. Kraemer MU, Faria NR, Reiner RC, Jr., et al. Spread of yellow fever virus outbreak in Angola and the  
46 336 Democratic Republic of the Congo 2015-16: a modelling study. *The Lancet Infectious diseases* 2016 doi:  
47 337 10.1016/s1473-3099(16)30513-8 [published Online First: 2016/12/27]
- 48  
49 338 13. Muyanja E, Ssemaganda A, Ngauv P, et al. Immune activation alters cellular and humoral responses to  
50 339 yellow fever 17D vaccine. *The Journal of clinical investigation* 2014;124(7):3147-58. doi: 10.1172/jci75429  
51 340 [published Online First: 2014/06/10]
- 52  
53 341 14. Aguiar M, Stollenwerk N, Halstead SB. The Impact of the Newly Licensed Dengue Vaccine in Endemic  
54 342 Countries. *PLoS neglected tropical diseases* 2016;10(12):e0005179. doi: 10.1371/journal.pntd.0005179  
55 343 [published Online First: 2016/12/22]
- 56  
57 344 15. Dharmasena MN, Osorio M, Filipova S, et al. Stable expression of *Shigella dysenteriae* serotype 1 O-antigen  
58 345 genes integrated into the chromosome of live *Salmonella* oral vaccine vector Ty21a. *Pathogens and disease*  
59 346 2016 doi: 10.1093/femspd/ftw098 [published Online First: 2016/09/23]

- 1  
2  
3 347 16. Carias C, Walters MS, Wefula E, et al. Economic evaluation of typhoid vaccination in a prolonged typhoid  
4 348 outbreak setting: the case of Kasese district in Uganda. *Vaccine* 2015;33(17):2079-85. doi:  
5 349 10.1016/j.vaccine.2015.02.027 [published Online First: 2015/02/26]  
6  
7 350 17. Melhem RF, LoVerde PT. Mechanism of interaction of Salmonella and Schistosoma species. *Infection and*  
8 351 *immunity* 1984;44(2):274-81. [published Online First: 1984/05/01]  
9  
10 352 18. Muniz-Junqueira MI, Tavares-Neto J, Prata A, et al. Antibody response to Salmonella typhi in human  
11 353 schistosomiasis mansoni. *Revista da Sociedade Brasileira de Medicina Tropical* 1996;29(5):441-5. [published  
12 354 Online First: 1996/09/01]  
13  
14 355 19. WHO. Position Paper on Typhoid vaccines: WHO position paper – March 2018 2018  
15  
16 356 20. Brown J, Baisley K, Kavishe B, et al. Impact of malaria and helminth infections on immunogenicity of the  
17 357 human papillomavirus-16/18 AS04-adjuvanted vaccine in Tanzania. *Vaccine* 2014;32(5):611-7. doi:  
18 358 10.1016/j.vaccine.2013.11.061  
19  
20 359 21. Riner DK, Ndombi EM, Carter JM, et al. Schistosoma mansoni Infection Can Jeopardize the Duration of  
21 360 Protective Levels of Antibody Responses to Immunizations against Hepatitis B and Tetanus Toxoid. *PLoS*  
22 361 *neglected tropical diseases* 2016;10(12):e0005180. doi: 10.1371/journal.pntd.0005180  
23  
24 362 22. Centre HI. HPV and related diseases report: Uganda. 2016.  
25 363 <http://www.hpvcnre.net/statistics/reports/UGA.pdf> (accessed 20.01.2017).  
26  
27 364 23. WHO. Human papillomavirus vaccines: WHO position paper, May 2017. *Releve epidemiologique*  
28 365 *hebdomadaire* 2017;92(19):241-68. [published Online First: 2017/05/23]  
29  
30 366 24. Sabin EA, Araujo MI, Carvalho EM, et al. Impairment of tetanus toxoid-specific Th1-like immune responses  
31 367 in humans infected with Schistosoma mansoni. *The Journal of infectious diseases* 1996;173(1):269-72.  
32 368 [published Online First: 1996/01/01]  
33  
34 369 25. Nanteza B, Galukande M, Aceng J, et al. The burden of tetanus in Uganda. *SpringerPlus* 2016;5(1):705. doi:  
35 370 10.1186/s40064-016-2309-z [published Online First: 2016/06/29]  
36  
37 371 26. Ministry of Health–Uganda. Uganda Clinical Guidelines 2016.  
38 372 <http://apps.who.int/medicinedocs/documents/s23532en/s23532en.pdf>  
39  
40 373 27. WHO. Haemoglobin concentrations for the diagnosis of anaemia and assessment of severity. Vitamin and  
41 374 Mineral Nutrition Information System. Geneva, World Health Organization, 2011  
42 375 (WHO/NMH/NHD/MNM/11.1).  
43  
44 376 28. Sanya RE, Nkurunungi G, Hoek Spaans R, et al. The Impact of Intensive Versus Standard Anthelmintic  
45 377 Treatment on Allergy-related Outcomes, Helminth Infection Intensity, and Helminth-related Morbidity in  
46 378 Lake Victoria Fishing Communities, Uganda: Results From the LaVIISWA Cluster-randomized Trial. *Clinical*  
47 379 *Infectious Diseases* 2018:ciy761-ciy61. doi: 10.1093/cid/ciy761  
48  
49 380 29. CDC. Centers for Disease Control and Prevention, vaccines and immunizations.  
50  
51 381 30. WHO. Information sheet observed rate of vaccine reactions Bacille Calmette-Guérin (BCG) vaccine. 2012  
52  
53 382 31. Arts RJW, Moorlag S, Novakovic B, et al. BCG Vaccination Protects against Experimental Viral Infection in  
54 383 Humans through the Induction of Cytokines Associated with Trained Immunity. *Cell host & microbe*  
55 384 2018;23(1):89-100.e5. doi: 10.1016/j.chom.2017.12.010 [published Online First: 2018/01/13]  
56 385  
57  
58  
59  
60

# Reporting checklist for protocol of a clinical trial.

Based on the SPIRIT guidelines.

## Instructions to authors

Complete this checklist by entering the page numbers from your manuscript where readers will find each of the items listed below.

Your article may not currently address all the items on the checklist. Please modify your text to include the missing information. If you are certain that an item does not apply, please write "n/a" and provide a short explanation.

Upload your completed checklist as an extra file when you submit to a journal.

In your methods section, say that you used the SPIRIT reporting guidelines, and cite them as:

Chan A-W, Tetzlaff JM, Altman DG, Laupacis A, Gøtzsche PC, Krleža-Jerić K, Hróbjartsson A, Mann H, Dickersin K, Berlin J, Doré C, Parulekar W, Summerskill W, Groves T, Schulz K, Sox H, Rockhold FW, Rennie D, Moher D. SPIRIT 2013 Statement: Defining standard protocol items for clinical trials. *Ann Intern Med.* 2013;158(3):200-207

|                                   | Reporting Item                                                                                                                  | Page Number                                |
|-----------------------------------|---------------------------------------------------------------------------------------------------------------------------------|--------------------------------------------|
| <b>Administrative information</b> |                                                                                                                                 |                                            |
| Title                             | <a href="#">#1</a> Descriptive title identifying the study design, population, interventions, and, if applicable, trial acronym | 1                                          |
| Trial registration                | <a href="#">#2a</a> Trial identifier and registry name. If not yet registered, name of intended registry                        | 2                                          |
| Trial registration: data set      | <a href="#">#2b</a> All items from the World Health Organization Trial Registration Data Set                                    | n/a                                        |
| Protocol version                  | <a href="#">#3</a> Date and version identifier                                                                                  | Information available at<br>ISRCTN60517191 |
| Funding                           | <a href="#">#4</a> Sources and types of financial, material, and other support                                                  | 15                                         |
| Roles and                         | <a href="#">#5a</a> Names, affiliations, and roles of protocol                                                                  | 15                                         |

|                                                                       |                     |                                                                                                                                                                                                                                                                                          |                                                              |
|-----------------------------------------------------------------------|---------------------|------------------------------------------------------------------------------------------------------------------------------------------------------------------------------------------------------------------------------------------------------------------------------------------|--------------------------------------------------------------|
| responsibilities:<br>contributorship                                  |                     | contributors                                                                                                                                                                                                                                                                             |                                                              |
| Roles and responsibilities:<br>sponsor contact information            | <a href="#">#5b</a> | Name and contact information for the trial sponsor                                                                                                                                                                                                                                       | Information available at<br>ISRCTN60517191                   |
| Roles and responsibilities:<br>sponsor and funder                     | <a href="#">#5c</a> | Role of study sponsor and funders, if any, in study design; collection, management, analysis, and interpretation of data; writing of the report; and the decision to submit the report for publication, including whether they will have ultimate authority over any of these activities | 16                                                           |
| Roles and responsibilities:<br>committees                             | <a href="#">#5d</a> | Composition, roles, and responsibilities of the coordinating centre, steering committee, endpoint adjudication committee, data management team, and other individuals or groups overseeing the trial, if applicable (see Item 21a for data monitoring committee)                         | Information detailed in<br>supplementary<br>information file |
| <b>Introduction</b>                                                   |                     |                                                                                                                                                                                                                                                                                          |                                                              |
| Background and rationale                                              | <a href="#">#6a</a> | Description of research question and justification for undertaking the trial, including summary of relevant studies (published and unpublished) examining benefits and harms for each intervention                                                                                       | 4                                                            |
| Background and rationale: choice of comparators                       | <a href="#">#6b</a> | Explanation for choice of comparators                                                                                                                                                                                                                                                    | 8                                                            |
| Objectives                                                            | <a href="#">#7</a>  | Specific objectives or hypotheses                                                                                                                                                                                                                                                        | 6                                                            |
| Trial design                                                          | <a href="#">#8</a>  | Description of trial design including type of trial (eg, parallel group, crossover, factorial, single group), allocation ratio, and framework (eg, superiority, equivalence, non-inferiority, exploratory)                                                                               | 7                                                            |
| <b>Methods:<br/>Participants,<br/>interventions, and<br/>outcomes</b> |                     |                                                                                                                                                                                                                                                                                          |                                                              |

|    |                      |                      |                                                                                                                                                                                                                                                                                                                                                                                |                                                           |
|----|----------------------|----------------------|--------------------------------------------------------------------------------------------------------------------------------------------------------------------------------------------------------------------------------------------------------------------------------------------------------------------------------------------------------------------------------|-----------------------------------------------------------|
| 1  | Study setting        | <a href="#">#9</a>   | Description of study settings (eg, community clinic, academic hospital) and list of countries where data will be collected. Reference to where list of study sites can be obtained                                                                                                                                                                                             | 7                                                         |
| 2  |                      |                      |                                                                                                                                                                                                                                                                                                                                                                                |                                                           |
| 3  |                      |                      |                                                                                                                                                                                                                                                                                                                                                                                |                                                           |
| 4  |                      |                      |                                                                                                                                                                                                                                                                                                                                                                                |                                                           |
| 5  |                      |                      |                                                                                                                                                                                                                                                                                                                                                                                |                                                           |
| 6  |                      |                      |                                                                                                                                                                                                                                                                                                                                                                                |                                                           |
| 7  |                      |                      |                                                                                                                                                                                                                                                                                                                                                                                |                                                           |
| 8  | Eligibility criteria | <a href="#">#10</a>  | Inclusion and exclusion criteria for participants. If applicable, eligibility criteria for study centres and individuals who will perform the interventions (eg, surgeons, psychotherapists)                                                                                                                                                                                   | 7                                                         |
| 9  |                      |                      |                                                                                                                                                                                                                                                                                                                                                                                |                                                           |
| 10 |                      |                      |                                                                                                                                                                                                                                                                                                                                                                                |                                                           |
| 11 |                      |                      |                                                                                                                                                                                                                                                                                                                                                                                |                                                           |
| 12 |                      |                      |                                                                                                                                                                                                                                                                                                                                                                                |                                                           |
| 13 |                      |                      |                                                                                                                                                                                                                                                                                                                                                                                |                                                           |
| 14 | Interventions:       | <a href="#">#11a</a> | Interventions for each group with sufficient detail to allow replication, including how and when they will be administered                                                                                                                                                                                                                                                     | 8                                                         |
| 15 | description          |                      |                                                                                                                                                                                                                                                                                                                                                                                |                                                           |
| 16 |                      |                      |                                                                                                                                                                                                                                                                                                                                                                                |                                                           |
| 17 |                      |                      |                                                                                                                                                                                                                                                                                                                                                                                |                                                           |
| 18 |                      |                      |                                                                                                                                                                                                                                                                                                                                                                                |                                                           |
| 19 |                      |                      |                                                                                                                                                                                                                                                                                                                                                                                |                                                           |
| 20 | Interventions:       | <a href="#">#11b</a> | Criteria for discontinuing or modifying allocated interventions for a given trial participant (eg, drug dose change in response to harms, participant request, or improving / worsening disease)                                                                                                                                                                               | Detailed in supplementary information file                |
| 21 | modifications        |                      |                                                                                                                                                                                                                                                                                                                                                                                |                                                           |
| 22 |                      |                      |                                                                                                                                                                                                                                                                                                                                                                                |                                                           |
| 23 |                      |                      |                                                                                                                                                                                                                                                                                                                                                                                |                                                           |
| 24 |                      |                      |                                                                                                                                                                                                                                                                                                                                                                                |                                                           |
| 25 |                      |                      |                                                                                                                                                                                                                                                                                                                                                                                |                                                           |
| 26 |                      |                      |                                                                                                                                                                                                                                                                                                                                                                                |                                                           |
| 27 | Interventions:       | <a href="#">#11c</a> | Strategies to improve adherence to intervention protocols, and any procedures for monitoring adherence (eg, drug tablet return; laboratory tests)                                                                                                                                                                                                                              | Detailed in supplementary information file                |
| 28 | adherence            |                      |                                                                                                                                                                                                                                                                                                                                                                                |                                                           |
| 29 |                      |                      |                                                                                                                                                                                                                                                                                                                                                                                |                                                           |
| 30 |                      |                      |                                                                                                                                                                                                                                                                                                                                                                                |                                                           |
| 31 |                      |                      |                                                                                                                                                                                                                                                                                                                                                                                |                                                           |
| 32 | Interventions:       | <a href="#">#11d</a> | Relevant concomitant care and interventions that are permitted or prohibited during the trial                                                                                                                                                                                                                                                                                  | Detailed in supplementary information file                |
| 33 | concomitant care     |                      |                                                                                                                                                                                                                                                                                                                                                                                |                                                           |
| 34 |                      |                      |                                                                                                                                                                                                                                                                                                                                                                                |                                                           |
| 35 |                      |                      |                                                                                                                                                                                                                                                                                                                                                                                |                                                           |
| 36 |                      |                      |                                                                                                                                                                                                                                                                                                                                                                                |                                                           |
| 37 | Outcomes             | <a href="#">#12</a>  | Primary, secondary, and other outcomes, including the specific measurement variable (eg, systolic blood pressure), analysis metric (eg, change from baseline, final value, time to event), method of aggregation (eg, median, proportion), and time point for each outcome. Explanation of the clinical relevance of chosen efficacy and harm outcomes is strongly recommended | 10                                                        |
| 38 |                      |                      |                                                                                                                                                                                                                                                                                                                                                                                |                                                           |
| 39 |                      |                      |                                                                                                                                                                                                                                                                                                                                                                                |                                                           |
| 40 |                      |                      |                                                                                                                                                                                                                                                                                                                                                                                |                                                           |
| 41 |                      |                      |                                                                                                                                                                                                                                                                                                                                                                                |                                                           |
| 42 |                      |                      |                                                                                                                                                                                                                                                                                                                                                                                |                                                           |
| 43 |                      |                      |                                                                                                                                                                                                                                                                                                                                                                                |                                                           |
| 44 |                      |                      |                                                                                                                                                                                                                                                                                                                                                                                |                                                           |
| 45 |                      |                      |                                                                                                                                                                                                                                                                                                                                                                                |                                                           |
| 46 |                      |                      |                                                                                                                                                                                                                                                                                                                                                                                |                                                           |
| 47 |                      |                      |                                                                                                                                                                                                                                                                                                                                                                                |                                                           |
| 48 |                      |                      |                                                                                                                                                                                                                                                                                                                                                                                |                                                           |
| 49 |                      |                      |                                                                                                                                                                                                                                                                                                                                                                                |                                                           |
| 50 | Participant timeline | <a href="#">#13</a>  | Time schedule of enrolment, interventions (including any run-ins and washouts), assessments, and visits for participants. A schematic diagram is highly recommended (see Figure)                                                                                                                                                                                               | 14                                                        |
| 51 |                      |                      |                                                                                                                                                                                                                                                                                                                                                                                |                                                           |
| 52 |                      |                      |                                                                                                                                                                                                                                                                                                                                                                                |                                                           |
| 53 |                      |                      |                                                                                                                                                                                                                                                                                                                                                                                | Also detailed in supplementary information file, Table S1 |
| 54 |                      |                      |                                                                                                                                                                                                                                                                                                                                                                                |                                                           |
| 55 |                      |                      |                                                                                                                                                                                                                                                                                                                                                                                |                                                           |
| 56 |                      |                      |                                                                                                                                                                                                                                                                                                                                                                                |                                                           |
| 57 |                      |                      |                                                                                                                                                                                                                                                                                                                                                                                |                                                           |
| 58 |                      |                      |                                                                                                                                                                                                                                                                                                                                                                                |                                                           |
| 59 |                      |                      |                                                                                                                                                                                                                                                                                                                                                                                |                                                           |
| 60 |                      |                      |                                                                                                                                                                                                                                                                                                                                                                                |                                                           |



|    |                           |                      |                                                          |                  |
|----|---------------------------|----------------------|----------------------------------------------------------|------------------|
| 1  | Sample size               | <a href="#">#14</a>  | Estimated number of participants needed to achieve       | 11               |
| 2  |                           |                      | study objectives and how it was determined,              |                  |
| 3  |                           |                      | including clinical and statistical assumptions           |                  |
| 4  |                           |                      | supporting any sample size calculations                  |                  |
| 5  |                           |                      |                                                          |                  |
| 6  |                           |                      |                                                          |                  |
| 7  |                           |                      |                                                          |                  |
| 8  | Recruitment               | <a href="#">#15</a>  | Strategies for achieving adequate participant            | Detailed in      |
| 9  |                           |                      | enrolment to reach target sample size                    | supplementary    |
| 10 |                           |                      |                                                          | information file |
| 11 |                           |                      |                                                          |                  |
| 12 |                           |                      |                                                          |                  |
| 13 | <b>Methods:</b>           |                      |                                                          |                  |
| 14 | <b>Assignment of</b>      |                      |                                                          |                  |
| 15 | <b>interventions (for</b> |                      |                                                          |                  |
| 16 | <b>controlled trials)</b> |                      |                                                          |                  |
| 17 |                           |                      |                                                          |                  |
| 18 |                           |                      |                                                          |                  |
| 19 |                           |                      |                                                          |                  |
| 20 | Allocation: sequence      | <a href="#">#16a</a> | Method of generating the allocation sequence (eg,        | 8                |
| 21 | generation                |                      | computer-generated random numbers), and list of          |                  |
| 22 |                           |                      | any factors for stratification. To reduce predictability |                  |
| 23 |                           |                      | of a random sequence, details of any planned             |                  |
| 24 |                           |                      | restriction (eg, blocking) should be provided in a       |                  |
| 25 |                           |                      | separate document that is unavailable to those who       |                  |
| 26 |                           |                      | enrol participants or assign interventions               |                  |
| 27 |                           |                      |                                                          |                  |
| 28 |                           |                      |                                                          |                  |
| 29 |                           |                      |                                                          |                  |
| 30 |                           |                      |                                                          |                  |
| 31 | Allocation                | <a href="#">#16b</a> | Mechanism of implementing the allocation sequence        | 9                |
| 32 | concealment               |                      | (eg, central telephone; sequentially numbered,           |                  |
| 33 | mechanism                 |                      | opaque, sealed envelopes), describing any steps to       |                  |
| 34 |                           |                      | conceal the sequence until interventions are assigned    |                  |
| 35 |                           |                      |                                                          |                  |
| 36 |                           |                      |                                                          |                  |
| 37 |                           |                      |                                                          |                  |
| 38 | Allocation:               | <a href="#">#16c</a> | Who will generate the allocation sequence, who will      | 8, 9             |
| 39 | implementation            |                      | enrol participants, and who will assign participants to  |                  |
| 40 |                           |                      | interventions                                            |                  |
| 41 |                           |                      |                                                          |                  |
| 42 |                           |                      |                                                          |                  |
| 43 | Blinding (masking)        | <a href="#">#17a</a> | Who will be blinded after assignment to                  | 9                |
| 44 |                           |                      | interventions (eg, trial participants, care providers,   |                  |
| 45 |                           |                      | outcome assessors, data analysts), and how               |                  |
| 46 |                           |                      |                                                          |                  |
| 47 |                           |                      |                                                          |                  |
| 48 |                           |                      |                                                          |                  |
| 49 | Blinding (masking):       | <a href="#">#17b</a> | If blinded, circumstances under which unblinding is      | Detailed in      |
| 50 | emergency                 |                      | permissible, and procedure for revealing a               | supplementary    |
| 51 | unblinding                |                      | participant's allocated intervention during the trial    | information file |
| 52 |                           |                      |                                                          |                  |
| 53 |                           |                      |                                                          |                  |

**Methods: Data  
collection,  
management, and  
analysis**

|    |                                                  |                      |                                                                                                                                                                                                                                                                                                                                                                                                              |                                                                                                  |
|----|--------------------------------------------------|----------------------|--------------------------------------------------------------------------------------------------------------------------------------------------------------------------------------------------------------------------------------------------------------------------------------------------------------------------------------------------------------------------------------------------------------|--------------------------------------------------------------------------------------------------|
| 1  | Data collection plan                             | <a href="#">#18a</a> | Plans for assessment and collection of outcome, baseline, and other trial data, including any related processes to promote data quality (eg, duplicate measurements, training of assessors) and a description of study instruments (eg, questionnaires, laboratory tests) along with their reliability and validity, if known. Reference to where data collection forms can be found, if not in the protocol | 10.<br>More details in supplementary information file                                            |
| 2  |                                                  |                      |                                                                                                                                                                                                                                                                                                                                                                                                              |                                                                                                  |
| 3  |                                                  |                      |                                                                                                                                                                                                                                                                                                                                                                                                              |                                                                                                  |
| 4  |                                                  |                      |                                                                                                                                                                                                                                                                                                                                                                                                              |                                                                                                  |
| 5  |                                                  |                      |                                                                                                                                                                                                                                                                                                                                                                                                              |                                                                                                  |
| 6  |                                                  |                      |                                                                                                                                                                                                                                                                                                                                                                                                              |                                                                                                  |
| 7  |                                                  |                      |                                                                                                                                                                                                                                                                                                                                                                                                              |                                                                                                  |
| 8  |                                                  |                      |                                                                                                                                                                                                                                                                                                                                                                                                              |                                                                                                  |
| 9  |                                                  |                      |                                                                                                                                                                                                                                                                                                                                                                                                              |                                                                                                  |
| 10 |                                                  |                      |                                                                                                                                                                                                                                                                                                                                                                                                              |                                                                                                  |
| 11 |                                                  |                      |                                                                                                                                                                                                                                                                                                                                                                                                              |                                                                                                  |
| 12 |                                                  |                      |                                                                                                                                                                                                                                                                                                                                                                                                              |                                                                                                  |
| 13 |                                                  |                      |                                                                                                                                                                                                                                                                                                                                                                                                              |                                                                                                  |
| 14 | Data collection plan: retention                  | <a href="#">#18b</a> | Plans to promote participant retention and complete follow-up, including list of any outcome data to be collected for participants who discontinue or deviate from intervention protocols                                                                                                                                                                                                                    | Detailed in supplementary information file                                                       |
| 15 |                                                  |                      |                                                                                                                                                                                                                                                                                                                                                                                                              |                                                                                                  |
| 16 |                                                  |                      |                                                                                                                                                                                                                                                                                                                                                                                                              |                                                                                                  |
| 17 |                                                  |                      |                                                                                                                                                                                                                                                                                                                                                                                                              |                                                                                                  |
| 18 |                                                  |                      |                                                                                                                                                                                                                                                                                                                                                                                                              |                                                                                                  |
| 19 |                                                  |                      |                                                                                                                                                                                                                                                                                                                                                                                                              |                                                                                                  |
| 20 |                                                  |                      |                                                                                                                                                                                                                                                                                                                                                                                                              |                                                                                                  |
| 21 | Data management                                  | <a href="#">#19</a>  | Plans for data entry, coding, security, and storage, including any related processes to promote data quality (eg, double data entry; range checks for data values). Reference to where details of data management procedures can be found, if not in the protocol                                                                                                                                            | 13.<br>More information in the statistical analysis plan found at <a href="#">ISRCTN60517191</a> |
| 22 |                                                  |                      |                                                                                                                                                                                                                                                                                                                                                                                                              |                                                                                                  |
| 23 |                                                  |                      |                                                                                                                                                                                                                                                                                                                                                                                                              |                                                                                                  |
| 24 |                                                  |                      |                                                                                                                                                                                                                                                                                                                                                                                                              |                                                                                                  |
| 25 |                                                  |                      |                                                                                                                                                                                                                                                                                                                                                                                                              |                                                                                                  |
| 26 |                                                  |                      |                                                                                                                                                                                                                                                                                                                                                                                                              |                                                                                                  |
| 27 |                                                  |                      |                                                                                                                                                                                                                                                                                                                                                                                                              |                                                                                                  |
| 28 |                                                  |                      |                                                                                                                                                                                                                                                                                                                                                                                                              |                                                                                                  |
| 29 |                                                  |                      |                                                                                                                                                                                                                                                                                                                                                                                                              |                                                                                                  |
| 30 |                                                  |                      |                                                                                                                                                                                                                                                                                                                                                                                                              |                                                                                                  |
| 31 | Statistics: outcomes                             | <a href="#">#20a</a> | Statistical methods for analysing primary and secondary outcomes. Reference to where other details of the statistical analysis plan can be found, if not in the protocol                                                                                                                                                                                                                                     | 13.<br>More information in the statistical analysis plan found at <a href="#">ISRCTN60517191</a> |
| 32 |                                                  |                      |                                                                                                                                                                                                                                                                                                                                                                                                              |                                                                                                  |
| 33 |                                                  |                      |                                                                                                                                                                                                                                                                                                                                                                                                              |                                                                                                  |
| 34 |                                                  |                      |                                                                                                                                                                                                                                                                                                                                                                                                              |                                                                                                  |
| 35 |                                                  |                      |                                                                                                                                                                                                                                                                                                                                                                                                              |                                                                                                  |
| 36 |                                                  |                      |                                                                                                                                                                                                                                                                                                                                                                                                              |                                                                                                  |
| 37 |                                                  |                      |                                                                                                                                                                                                                                                                                                                                                                                                              |                                                                                                  |
| 38 |                                                  |                      |                                                                                                                                                                                                                                                                                                                                                                                                              |                                                                                                  |
| 39 |                                                  |                      |                                                                                                                                                                                                                                                                                                                                                                                                              |                                                                                                  |
| 40 | Statistics: additional analyses                  | <a href="#">#20b</a> | Methods for any additional analyses (eg, subgroup and adjusted analyses)                                                                                                                                                                                                                                                                                                                                     | 11.<br>More information in the statistical analysis plan found at <a href="#">ISRCTN60517191</a> |
| 41 |                                                  |                      |                                                                                                                                                                                                                                                                                                                                                                                                              |                                                                                                  |
| 42 |                                                  |                      |                                                                                                                                                                                                                                                                                                                                                                                                              |                                                                                                  |
| 43 |                                                  |                      |                                                                                                                                                                                                                                                                                                                                                                                                              |                                                                                                  |
| 44 |                                                  |                      |                                                                                                                                                                                                                                                                                                                                                                                                              |                                                                                                  |
| 45 |                                                  |                      |                                                                                                                                                                                                                                                                                                                                                                                                              |                                                                                                  |
| 46 |                                                  |                      |                                                                                                                                                                                                                                                                                                                                                                                                              |                                                                                                  |
| 47 |                                                  |                      |                                                                                                                                                                                                                                                                                                                                                                                                              |                                                                                                  |
| 48 |                                                  |                      |                                                                                                                                                                                                                                                                                                                                                                                                              |                                                                                                  |
| 49 | Statistics: analysis population and missing data | <a href="#">#20c</a> | Definition of analysis population relating to protocol non-adherence (eg, as randomised analysis), and any statistical methods to handle missing data (eg, multiple imputation)                                                                                                                                                                                                                              | Information in the statistical analysis plan found at <a href="#">ISRCTN60517191</a>             |
| 50 |                                                  |                      |                                                                                                                                                                                                                                                                                                                                                                                                              |                                                                                                  |
| 51 |                                                  |                      |                                                                                                                                                                                                                                                                                                                                                                                                              |                                                                                                  |
| 52 |                                                  |                      |                                                                                                                                                                                                                                                                                                                                                                                                              |                                                                                                  |
| 53 |                                                  |                      |                                                                                                                                                                                                                                                                                                                                                                                                              |                                                                                                  |
| 54 |                                                  |                      |                                                                                                                                                                                                                                                                                                                                                                                                              |                                                                                                  |

## Methods: Monitoring



|    |                      |                      |                                                          |                  |
|----|----------------------|----------------------|----------------------------------------------------------|------------------|
| 1  | Data monitoring:     | <a href="#">#21a</a> | Composition of data monitoring committee (DMC);          | Detailed in      |
| 2  | formal committee     |                      | summary of its role and reporting structure;             | supplementary    |
| 3  |                      |                      | statement of whether it is independent from the          | information file |
| 4  |                      |                      | sponsor and competing interests; and reference to        |                  |
| 5  |                      |                      | where further details about its charter can be found,    |                  |
| 6  |                      |                      | if not in the protocol. Alternatively, an explanation of |                  |
| 7  |                      |                      | why a DMC is not needed                                  |                  |
| 8  |                      |                      |                                                          |                  |
| 9  |                      |                      |                                                          |                  |
| 10 |                      |                      |                                                          |                  |
| 11 |                      |                      |                                                          |                  |
| 12 | Data monitoring:     | <a href="#">#21b</a> | Description of any interim analyses and stopping         | Detailed in      |
| 13 | interim analysis     |                      | guidelines, including who will have access to these      | supplementary    |
| 14 |                      |                      | interim results and make the final decision to           | information file |
| 15 |                      |                      | terminate the trial                                      |                  |
| 16 |                      |                      |                                                          |                  |
| 17 |                      |                      |                                                          |                  |
| 18 |                      |                      |                                                          |                  |
| 19 | Harms                | <a href="#">#22</a>  | Plans for collecting, assessing, reporting, and          | Detailed in      |
| 20 |                      |                      | managing solicited and spontaneously reported            | supplementary    |
| 21 |                      |                      | adverse events and other unintended effects of trial     | information file |
| 22 |                      |                      | interventions or trial conduct                           |                  |
| 23 |                      |                      |                                                          |                  |
| 24 |                      |                      |                                                          |                  |
| 25 |                      |                      |                                                          |                  |
| 26 | Auditing             | <a href="#">#23</a>  | Frequency and procedures for auditing trial conduct,     | Detailed in      |
| 27 |                      |                      | if any, and whether the process will be independent      | supplementary    |
| 28 |                      |                      | from investigators and the sponsor                       | information file |
| 29 |                      |                      |                                                          |                  |
| 30 |                      |                      |                                                          |                  |
| 31 | <b>Ethics and</b>    |                      |                                                          |                  |
| 32 | <b>dissemination</b> |                      |                                                          |                  |
| 33 |                      |                      |                                                          |                  |
| 34 |                      |                      |                                                          |                  |
| 35 | Research ethics      | <a href="#">#24</a>  | Plans for seeking research ethics committee /            | 12               |
| 36 | approval             |                      | institutional review board (REC / IRB) approval          |                  |
| 37 |                      |                      |                                                          |                  |
| 38 |                      |                      |                                                          |                  |
| 39 | Protocol             | <a href="#">#25</a>  | Plans for communicating important protocol               | 11               |
| 40 | amendments           |                      | modifications (eg, changes to eligibility criteria,      |                  |
| 41 |                      |                      | outcomes, analyses) to relevant parties (eg,             |                  |
| 42 |                      |                      | investigators, REC / IRBs, trial participants, trial     |                  |
| 43 |                      |                      | registries, journals, regulators)                        |                  |
| 44 |                      |                      |                                                          |                  |
| 45 |                      |                      |                                                          |                  |
| 46 |                      |                      |                                                          |                  |
| 47 | Consent or assent    | <a href="#">#26a</a> | Who will obtain informed consent or assent from          | 12.              |
| 48 |                      |                      | potential trial participants or authorised surrogates,   |                  |
| 49 |                      |                      | and how (see Item 32)                                    |                  |
| 50 |                      |                      |                                                          | Also detailed in |
| 51 |                      |                      |                                                          | supplementary    |
| 52 |                      |                      |                                                          | information file |
| 53 |                      |                      |                                                          |                  |
| 54 |                      |                      |                                                          |                  |
| 55 | Consent or assent:   | <a href="#">#26b</a> | Additional consent provisions for collection and use     | Detailed in      |
| 56 | ancillary studies    |                      | of participant data and biological specimens in          | supplementary    |
| 57 |                      |                      | ancillary studies, if applicable                         | information file |
| 58 |                      |                      |                                                          |                  |
| 59 |                      |                      |                                                          |                  |
| 60 |                      |                      |                                                          |                  |

|    |                                             |                      |                                                                                                                                                                                                                                                                                     |                                            |
|----|---------------------------------------------|----------------------|-------------------------------------------------------------------------------------------------------------------------------------------------------------------------------------------------------------------------------------------------------------------------------------|--------------------------------------------|
| 1  | Confidentiality                             | <a href="#">#27</a>  | How personal information about potential and enrolled participants will be collected, shared, and maintained in order to protect confidentiality before, during, and after the trial                                                                                                | Detailed in supplementary information file |
| 2  |                                             |                      |                                                                                                                                                                                                                                                                                     |                                            |
| 3  |                                             |                      |                                                                                                                                                                                                                                                                                     |                                            |
| 4  |                                             |                      |                                                                                                                                                                                                                                                                                     |                                            |
| 5  |                                             |                      |                                                                                                                                                                                                                                                                                     |                                            |
| 6  |                                             |                      |                                                                                                                                                                                                                                                                                     |                                            |
| 7  |                                             |                      |                                                                                                                                                                                                                                                                                     |                                            |
| 8  | Declaration of interests                    | <a href="#">#28</a>  | Financial and other competing interests for principal investigators for the overall trial and each study site                                                                                                                                                                       | 15                                         |
| 9  |                                             |                      |                                                                                                                                                                                                                                                                                     |                                            |
| 10 |                                             |                      |                                                                                                                                                                                                                                                                                     |                                            |
| 11 | Data access                                 | <a href="#">#29</a>  | Statement of who will have access to the final trial dataset, and disclosure of contractual agreements that limit such access for investigators                                                                                                                                     | n/a                                        |
| 12 |                                             |                      |                                                                                                                                                                                                                                                                                     |                                            |
| 13 |                                             |                      |                                                                                                                                                                                                                                                                                     |                                            |
| 14 |                                             |                      |                                                                                                                                                                                                                                                                                     |                                            |
| 15 |                                             |                      |                                                                                                                                                                                                                                                                                     |                                            |
| 16 |                                             |                      |                                                                                                                                                                                                                                                                                     |                                            |
| 17 | Ancillary and post trial care               | <a href="#">#30</a>  | Provisions, if any, for ancillary and post-trial care, and for compensation to those who suffer harm from trial participation                                                                                                                                                       | Detailed in supplementary information file |
| 18 |                                             |                      |                                                                                                                                                                                                                                                                                     |                                            |
| 19 |                                             |                      |                                                                                                                                                                                                                                                                                     |                                            |
| 20 |                                             |                      |                                                                                                                                                                                                                                                                                     |                                            |
| 21 |                                             |                      |                                                                                                                                                                                                                                                                                     |                                            |
| 22 | Dissemination policy: trial results         | <a href="#">#31a</a> | Plans for investigators and sponsor to communicate trial results to participants, healthcare professionals, the public, and other relevant groups (eg, via publication, reporting in results databases, or other data sharing arrangements), including any publication restrictions | 2, 13                                      |
| 23 |                                             |                      |                                                                                                                                                                                                                                                                                     |                                            |
| 24 |                                             |                      |                                                                                                                                                                                                                                                                                     |                                            |
| 25 |                                             |                      |                                                                                                                                                                                                                                                                                     |                                            |
| 26 |                                             |                      |                                                                                                                                                                                                                                                                                     |                                            |
| 27 |                                             |                      |                                                                                                                                                                                                                                                                                     |                                            |
| 28 |                                             |                      |                                                                                                                                                                                                                                                                                     |                                            |
| 29 |                                             |                      |                                                                                                                                                                                                                                                                                     |                                            |
| 30 |                                             |                      |                                                                                                                                                                                                                                                                                     |                                            |
| 31 |                                             |                      |                                                                                                                                                                                                                                                                                     |                                            |
| 32 | Dissemination policy: authorship            | <a href="#">#31b</a> | Authorship eligibility guidelines and any intended use of professional writers                                                                                                                                                                                                      | n/a                                        |
| 33 |                                             |                      |                                                                                                                                                                                                                                                                                     |                                            |
| 34 |                                             |                      |                                                                                                                                                                                                                                                                                     |                                            |
| 35 |                                             |                      |                                                                                                                                                                                                                                                                                     |                                            |
| 36 | Dissemination policy: reproducible research | <a href="#">#31c</a> | Plans, if any, for granting public access to the full protocol, participant-level dataset, and statistical code                                                                                                                                                                     | 13                                         |
| 37 |                                             |                      |                                                                                                                                                                                                                                                                                     |                                            |
| 38 |                                             |                      |                                                                                                                                                                                                                                                                                     |                                            |
| 39 |                                             |                      |                                                                                                                                                                                                                                                                                     |                                            |
| 40 |                                             |                      |                                                                                                                                                                                                                                                                                     |                                            |
| 41 | <b>Appendices</b>                           |                      |                                                                                                                                                                                                                                                                                     |                                            |
| 42 |                                             |                      |                                                                                                                                                                                                                                                                                     |                                            |
| 43 | Informed consent materials                  | <a href="#">#32</a>  | Model consent form and other related documentation given to participants and authorised surrogates                                                                                                                                                                                  | Supplementary files provided               |
| 44 |                                             |                      |                                                                                                                                                                                                                                                                                     |                                            |
| 45 |                                             |                      |                                                                                                                                                                                                                                                                                     |                                            |
| 46 |                                             |                      |                                                                                                                                                                                                                                                                                     |                                            |
| 47 | Biological specimens                        | <a href="#">#33</a>  | Plans for collection, laboratory evaluation, and storage of biological specimens for genetic or molecular analysis in the current trial and for future use in ancillary studies, if applicable                                                                                      | n/a                                        |
| 48 |                                             |                      |                                                                                                                                                                                                                                                                                     |                                            |
| 49 |                                             |                      |                                                                                                                                                                                                                                                                                     |                                            |
| 50 |                                             |                      |                                                                                                                                                                                                                                                                                     |                                            |
| 51 |                                             |                      |                                                                                                                                                                                                                                                                                     |                                            |
| 52 |                                             |                      |                                                                                                                                                                                                                                                                                     |                                            |
| 53 |                                             |                      |                                                                                                                                                                                                                                                                                     |                                            |

None The SPIRIT checklist is distributed under the terms of the Creative Commons Attribution License CC-BY-ND 3.0. This checklist can be completed online using <https://www.goodreports.org/>, a tool made by the [EQUATOR Network](#) in collaboration with [Penelope.ai](#)

# BMJ Open

**The effect of intensive treatment for schistosomiasis on immune responses to vaccines among rural Ugandan island adolescents: randomised controlled trial protocol A for the 'POPulation differences in VACcine responses' (POPVAC) programme**

|                               |                                                                                                                                                                                                                                                                                                                                                                                                                                                                                                                                                                                                                                                                                                                                                                                                                                                                                                                                                                                                                                                                                                                                                                                                                                                                                                                                                                                                                                                                                                                                                                                                                                                                                                                                                                                                                                                                                                                                                                                               |
|-------------------------------|-----------------------------------------------------------------------------------------------------------------------------------------------------------------------------------------------------------------------------------------------------------------------------------------------------------------------------------------------------------------------------------------------------------------------------------------------------------------------------------------------------------------------------------------------------------------------------------------------------------------------------------------------------------------------------------------------------------------------------------------------------------------------------------------------------------------------------------------------------------------------------------------------------------------------------------------------------------------------------------------------------------------------------------------------------------------------------------------------------------------------------------------------------------------------------------------------------------------------------------------------------------------------------------------------------------------------------------------------------------------------------------------------------------------------------------------------------------------------------------------------------------------------------------------------------------------------------------------------------------------------------------------------------------------------------------------------------------------------------------------------------------------------------------------------------------------------------------------------------------------------------------------------------------------------------------------------------------------------------------------------|
| Journal:                      | <i>BMJ Open</i>                                                                                                                                                                                                                                                                                                                                                                                                                                                                                                                                                                                                                                                                                                                                                                                                                                                                                                                                                                                                                                                                                                                                                                                                                                                                                                                                                                                                                                                                                                                                                                                                                                                                                                                                                                                                                                                                                                                                                                               |
| Manuscript ID                 | bmjopen-2020-040426.R1                                                                                                                                                                                                                                                                                                                                                                                                                                                                                                                                                                                                                                                                                                                                                                                                                                                                                                                                                                                                                                                                                                                                                                                                                                                                                                                                                                                                                                                                                                                                                                                                                                                                                                                                                                                                                                                                                                                                                                        |
| Article Type:                 | Protocol                                                                                                                                                                                                                                                                                                                                                                                                                                                                                                                                                                                                                                                                                                                                                                                                                                                                                                                                                                                                                                                                                                                                                                                                                                                                                                                                                                                                                                                                                                                                                                                                                                                                                                                                                                                                                                                                                                                                                                                      |
| Date Submitted by the Author: | 05-Oct-2020                                                                                                                                                                                                                                                                                                                                                                                                                                                                                                                                                                                                                                                                                                                                                                                                                                                                                                                                                                                                                                                                                                                                                                                                                                                                                                                                                                                                                                                                                                                                                                                                                                                                                                                                                                                                                                                                                                                                                                                   |
| Complete List of Authors:     | Nkurunungi, Gyaviira; MRC/UVRI and LSHTM Uganda Research Unit, Immunomodulation and Vaccines Programme<br>Zirimenya , Ludoviko ; MRC/UVRI and LSHTM Uganda Research Unit, Immunomodulation and Vaccines Programme<br>Nassuuna , Jacent; MRC/UVRI and LSHTM Uganda Research Unit, Immunomodulation and Vaccines Programme<br>Natukunda , Agnes ; MRC/UVRI and LSHTM Uganda Research Unit, Immunomodulation and Vaccines Programme<br>Kabuubi , Prossy ; MRC/UVRI and LSHTM Uganda Research Unit, Immunomodulation and Vaccines Programme<br>Niwagaba , Emmanuel ; MRC/UVRI and LSHTM Uganda Research Unit, Immunomodulation and Vaccines Programme<br>Oduru, Gloria; MRC/UVRI and LSHTM Uganda Research Unit, Immunomodulation and Vaccines Programme<br>Kabami , Grace ; MRC/UVRI and LSHTM Uganda Research Unit, Immunomodulation and Vaccines Programme<br>Amongin , Rebecca ; MRC/UVRI and LSHTM Uganda Research Unit, Immunomodulation and Vaccines Programme<br>Mutebe , Alex ; MRC/UVRI and LSHTM Uganda Research Unit, Immunomodulation and Vaccines Programme<br>Namutebi , Milly ; MRC/UVRI and LSHTM Uganda Research Unit, Immunomodulation and Vaccines Programme<br>Zziwa , Christopher ; MRC/UVRI and LSHTM Uganda Research Unit, Immunomodulation and Vaccines Programme<br>Amongi, Susan; MRC/UVRI and LSHTM Uganda Research Unit, Immunomodulation and Vaccines Programme<br>Ninsiima , Caroline ; MRC/UVRI and LSHTM Uganda Research Unit, Immunomodulation and Vaccines Programme<br>Onen, Caroline; MRC/UVRI and LSHTM Uganda Research Unit, Immunomodulation and Vaccines Programme<br>Akello , Florence ; MRC/UVRI and LSHTM Uganda Research Unit, Immunomodulation and Vaccines Programme<br>Sewankambo, Moses; MRC/UVRI and LSHTM Uganda Research Unit, Immunomodulation and Vaccines Programme<br>Kiwankambo, Samuel; MRC/UVRI and LSHTM Uganda Research Unit, Immunomodulation and Vaccines Programme<br>Kizindo , Robert ; MRC/UVRI and LSHTM Uganda Research Unit, |

|                                   |                                                                                                                                                                                                                                                                                                                                                                                                                                                                                                                                                                                                                                                                   |
|-----------------------------------|-------------------------------------------------------------------------------------------------------------------------------------------------------------------------------------------------------------------------------------------------------------------------------------------------------------------------------------------------------------------------------------------------------------------------------------------------------------------------------------------------------------------------------------------------------------------------------------------------------------------------------------------------------------------|
|                                   | <p>Immunomodulation and Vaccines Programme<br/> Kaweesa, James; Republic of Uganda Ministry of Health, Vector Control Division<br/> Cose, Stephen; MRC/UVRI and LSHTM Uganda Research Unit, Immunomodulation and Vaccines Programme; London School of Hygiene and Tropical Medicine Department of Clinical Research<br/> Webb, Emily; London School of Hygiene &amp; Tropical Medicine, MRC Tropical Epidemiology Group, Department of Infectious Disease Epidemiology<br/> Elliott, Alison; MRC/UVRI and LSHTM Uganda Research Unit, Immunomodulation and Vaccines Programme; London School of Hygiene and Tropical Medicine Department of Clinical Research</p> |
| <b>Primary Subject Heading:</b>   | Infectious diseases                                                                                                                                                                                                                                                                                                                                                                                                                                                                                                                                                                                                                                               |
| <b>Secondary Subject Heading:</b> | Epidemiology, Immunology (including allergy), Public health                                                                                                                                                                                                                                                                                                                                                                                                                                                                                                                                                                                                       |
| <b>Keywords:</b>                  | Infection control < INFECTIOUS DISEASES, PARASITOLOGY, Public health < INFECTIOUS DISEASES, Immunology < TROPICAL MEDICINE, Epidemiology < TROPICAL MEDICINE, Paediatric infectious disease & immunisation < PAEDIATRICS                                                                                                                                                                                                                                                                                                                                                                                                                                          |
|                                   |                                                                                                                                                                                                                                                                                                                                                                                                                                                                                                                                                                                                                                                                   |

SCHOLARONE™  
Manuscripts

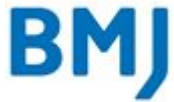

I, the Submitting Author has the right to grant and does grant on behalf of all authors of the Work (as defined in the below author licence), an exclusive licence and/or a non-exclusive licence for contributions from authors who are: i) UK Crown employees; ii) where BMJ has agreed a CC-BY licence shall apply, and/or iii) in accordance with the terms applicable for US Federal Government officers or employees acting as part of their official duties; on a worldwide, perpetual, irrevocable, royalty-free basis to BMJ Publishing Group Ltd ("BMJ") its licensees and where the relevant Journal is co-owned by BMJ to the co-owners of the Journal, to publish the Work in this journal and any other BMJ products and to exploit all rights, as set out in our [licence](#).

The Submitting Author accepts and understands that any supply made under these terms is made by BMJ to the Submitting Author unless you are acting as an employee on behalf of your employer or a postgraduate student of an affiliated institution which is paying any applicable article publishing charge ("APC") for Open Access articles. Where the Submitting Author wishes to make the Work available on an Open Access basis (and intends to pay the relevant APC), the terms of reuse of such Open Access shall be governed by a Creative Commons licence – details of these licences and which [Creative Commons](#) licence will apply to this Work are set out in our licence referred to above.

Other than as permitted in any relevant BMJ Author's Self Archiving Policies, I confirm this Work has not been accepted for publication elsewhere, is not being considered for publication elsewhere and does not duplicate material already published. I confirm all authors consent to publication of this Work and authorise the granting of this licence.

1  
2  
3 1 **The effect of intensive treatment for schistosomiasis on immune responses to vaccines among**  
4 **rural Ugandan island adolescents: randomised controlled trial protocol A for the ‘POPulation**  
5 **differences in VACCine responses’ (POPVAC) programme**  
6  
7

8  
9 4 Gyaviira Nkurunungi<sup>1,¶,\*</sup>, Ludoviko Zirimenya<sup>1,¶</sup>, Jacent Nassuuna<sup>1,¶</sup>, Agnes Natukunda<sup>1,¶</sup>, Prossy N  
10 Kabuubi<sup>1</sup>, Emmanuel Niwagaba<sup>1</sup>, Gloria Oduru<sup>1</sup>, Grace Kabami<sup>1</sup>, Rebecca Amongin<sup>1</sup>, Alex Mutebe<sup>1</sup>,  
11 Milly Namutebi<sup>1</sup>, Christopher Zziwa<sup>1</sup>, Susan Amongi<sup>1</sup>, Caroline Ninsiima<sup>1</sup>, Caroline Onen<sup>1</sup>, Florence  
12 Akello<sup>1</sup>, Moses Sewankambo<sup>1</sup>, Samuel Kiwanuka<sup>1</sup>, Robert Kizindo<sup>1</sup>, James Kaweesa<sup>2</sup>, Stephen Cose<sup>1,3</sup>,  
13  
14 7 Emily L Webb<sup>4</sup>, Alison M Elliott<sup>1,3</sup> **for the POPVAC trial team**  
15  
16 8

17 9  
18  
19  
20 10 <sup>1</sup>Immunomodulation and Vaccines Programme, Medical Research Council/Uganda Virus Research  
21 Institute and London School of Hygiene and Tropical Medicine (MRC/UVRI and LSHTM) Uganda  
22  
23 12 Research Unit, Entebbe, Uganda

24  
25 13 <sup>2</sup>Vector Control Division, Ministry of Health, Kampala, Uganda

26  
27 14 <sup>3</sup>Department of Clinical Research, London School of Hygiene and Tropical Medicine, London, United  
28  
29 15 Kingdom

30  
31 16 <sup>4</sup>MRC Tropical Epidemiology Group, Department of Infectious Disease Epidemiology, London School  
32  
33 17 of Hygiene and Tropical Medicine, London, United Kingdom

34  
35 18 <sup>¶</sup>These authors contributed equally

36  
37 19 **\*Correspondence:** Gyaviira Nkurunungi; [Gyaviira.Nkurunungi@mrcuganda.org](mailto:Gyaviira.Nkurunungi@mrcuganda.org)  
38  
39  
40  
41  
42  
43  
44  
45  
46  
47  
48  
49  
50  
51  
52  
53  
54  
55  
56  
57  
58  
59  
60

1  
2  
3 **20 Abstract**  
4

5 **21 Introduction**  
6

7  
8 Several licensed and investigational vaccines have lower efficacy, and induce impaired immune  
9  
10 responses, in low-income versus high-income countries and in rural, versus urban, settings.  
11  
12 Understanding these population differences is essential to optimising vaccine effectiveness in the  
13  
14 tropics. We suggest that repeated exposure to and immunomodulation by chronic helminth  
15  
16 infections partly explains population differences in vaccine response.  
17

16 **27 Methods and analysis**  
17

18  
19 We have designed an individually randomised, parallel group trial of intensive versus standard  
20  
21 praziquantel (PZQ) intervention against schistosomiasis, to determine effects on vaccine response  
22  
23 outcomes among school-going adolescents (9 to 17 years) from rural *Schistosoma mansoni* (*Sm*)-  
24  
25 endemic Ugandan islands. Vaccines to be studied comprise BCG on day 'zero'; yellow fever, oral  
26  
27 typhoid and Human Papilloma Virus (HPV) vaccines at week 4; and HPV and Tetanus/diphtheria  
28  
29 booster vaccine at week 28. The intensive arm will receive PZQ doses three times, each two weeks  
30  
31 apart, before BCG immunisation, followed by a dose at week 8 and quarterly thereafter. The  
32  
33 standard arm will receive PZQ at week 8 and week 52. We expect to enrol 480 participants, with 80%  
34  
35 *Sm* infected at the outset.  
36

37  
38 Primary outcomes are BCG-specific IFN- $\gamma$  ELISpot responses eight weeks after BCG immunisation and  
39  
40 for other vaccines, antibody responses to key vaccine antigens at four weeks after immunisation.  
41  
42 Secondary analyses will determine effects of intensive anthelmintic treatment on correlates of  
43  
44 protective immunity, on vaccine response waning, on priming vs boosting immunisations, and on *Sm*  
45  
46 infection status and intensity. Exploratory immunology assays using archived samples will enable  
47  
48 assessment of mechanistic links between helminths and vaccine responses.  
49

45 **43 Ethics and dissemination**  
46

47  
48 Ethics approval has been obtained from relevant Ugandan and UK ethics committees. Results will be  
49  
50 shared with Uganda Ministry of Health, relevant district councils, community leaders and study  
51  
52 participants. Further dissemination will be done through conference proceedings and publications.  
53

52 **47 Trial registration**  
53

54  
55 Current Controlled Trials identifier: ISRCTN60517191.  
56  
57  
58  
59  
60

1  
2  
3 50 **Article summary**  
4

5 51 *Strengths and limitations of this study*  
6

- 7 52
- 8 • This will be the first adequately powered intervention study to investigate effects of  
9 schistosomiasis treatment on vaccine responses in adolescents.  
10
  - 11 54 • Effects on both live-attenuated and inert vaccines will be studied.  
12
  - 13 55 • Our strong immunoepidemiological design and nested immunological studies will address  
14 specific hypotheses regarding pathways of effects.  
15
  - 16 57 • The sample archives developed will provide a major asset for exploration of new leads  
17 arising from this hypothesis-driven work, or for an alternative, “systems biology” approach  
18 58 investigating (for example) transcriptome, microbiome and virome.  
19 59
  - 20 60 • Even with intensive anthelmintic intervention, it may be difficult to “successfully” treat  
21 *Schistosoma* infection in our endemic setting due to re-infections; however, we still expect a  
22 substantial difference in intensity between the two trial arms.  
23 61  
24 62  
25 63

26  
27  
28 64 **Word count**  
29

30 65 3250  
31

32 66 **Keywords**  
33

34 67 Vaccine; Schistosomiasis; Praziquantel; Immunization  
35  
36  
37  
38  
39  
40  
41  
42  
43  
44  
45  
46  
47  
48  
49  
50  
51  
52  
53  
54  
55  
56  
57  
58  
59  
60



## 68 Introduction

69 Vaccine-specific immune responses are often impaired, and vaccine efficacy and effectiveness lower,  
70 in tropical low-income countries (LICs) compared to temperate high-income countries and in rural,  
71 compared to urban, LIC settings.<sup>1-8</sup> This has been recognised for both live vaccines (such as BCG,<sup>2,3,5,9</sup>  
72 polio,<sup>1</sup> yellow fever<sup>4</sup> vaccines) and non-live vaccines (such as influenza<sup>10</sup> and tetanus<sup>11</sup>).

73 Investigational malaria<sup>7</sup> and viral-vectored tuberculosis<sup>6</sup> and Ebola<sup>12</sup> vaccines are also affected.

74 Previous exposure to the target pathogen (or related organisms) may mask the benefit of the  
75 vaccine.<sup>13,14</sup> However, pre-vaccination exposure does not explain why Ebola trial vaccine-specific

76 responses differ between healthy UK and Senegalese adults,<sup>12</sup> as the target organism is rare.

77 Therefore, environmentally-dependent mechanisms may play an important role.<sup>5</sup>

78 A long-held hypothesis is that parasites, particularly helminths, modulate vaccine responses through

79 profound pre- and post-immunisation bystander effects on immunological activation and

80 regulation.<sup>15-17</sup> Helminths might also impact vaccines responses through interactions with the

81 complex ecosystem of mammalian gut bacteria, fungi, protozoa and viruses (the “trans-kingdom”

82 concept<sup>18</sup> detailed elsewhere in this journal [bmjopen-2020-040425]). Helminth-induced gut mucosa

83 damage, the associated translocation of microbial products into the systemic circulation<sup>19-21</sup> and

84 systemic immune activation or regulation mediated by microbial products might contribute to

85 modulation of responses to vaccines and other infections.

86 Helminth-mediated modulation of vaccine responses has not been substantiated in human

87 populations. No appropriately powered trials have been conducted to evaluate reversibility of their

88 effects. In animal models, helminths generally impair priming and accelerate waning of vaccine

89 responses, although effects vary with helminth species, vaccine type and the timing of infection and

90 immunisation.<sup>22</sup> Most observational studies in humans also suggest suppressed or biased responses

91 during helminth infection, especially during systemic infections, such as schistosomiasis and the

92 filariases. There is modest evidence that treating geohelminths in humans improves responses to

93 BCG<sup>23,24</sup> or oral cholera vaccine<sup>25</sup> and we found that schistosomiasis treatment improved the

94 measles-booster response in pre-school children.<sup>26</sup> There is therefore a strong case for a

95 comprehensive assessment of the effects of helminths and their treatment on vaccine responses.

96 The extent to which helminths and related “trans-kingdom” mediators causally and reversibly

97 impact immunological characteristics associated with vaccine responses may best be determined by

98 intervention studies. This trial protocol A of the ‘Population differences in Vaccine responses’

99 programme (POPVAC A; Current Controlled Trials identifier: ISRCTN60517191) has been designed to

100 evaluate the effect of *Schistosoma mansoni* and its treatment on vaccine responses. This study is

1  
2  
3  
4  
5  
6  
7  
8  
9  
10  
11  
12  
13  
14  
15  
16  
17  
18  
19  
20  
21  
22  
23  
24  
25  
26  
27  
28  
29  
30  
31  
32  
33  
34  
35  
36  
37  
38  
39  
40  
41  
42  
43  
44  
45  
46  
47  
48  
49  
50  
51  
52  
53  
54  
55  
56  
57  
58  
59  
60

101 one of three parallel trials whose designs and cross-cutting analyses are described separately in this  
102 journal (bmjopen-2020-040425, bmjopen-2020-040427 and bmjopen-2020-040430).

For peer review only

1  
2  
3 103 **Hypothesis**  
4

5 104 The overarching goal of the POPVAC programme is to understand population differences in vaccine  
6  
7 105 responses in Uganda, in order to identify strategies through which vaccine effectiveness can be  
8  
9 106 optimised for the low-income, tropical settings where they are especially needed. For this Trial A, we  
10  
11 107 focus on the hypothesis that *Schistosoma mansoni* infection suppresses responses to unrelated  
12  
13 108 vaccines; and that this effect can be reversed, at least in part, by intensive praziquantel treatment  
14  
15 109 intervention.

16 110 **Objective**

17  
18 111 To determine whether there are reversible effects of chronic *Schistosoma mansoni* infection on  
19  
20 112 vaccine response in adolescents, using an intervention study.  
21  
22  
23  
24  
25  
26  
27  
28  
29  
30  
31  
32  
33  
34  
35  
36  
37  
38  
39  
40  
41  
42  
43  
44  
45  
46  
47  
48  
49  
50  
51  
52  
53  
54  
55  
56  
57  
58  
59  
60

## 113 **Methods and analysis**

### 114 ***Setting and participants***

115 SPIRIT reporting guidelines<sup>27</sup> have been used. We will conduct an individually randomised, parallel  
116 group trial of intensive versus standard intervention against schistosomiasis (described below) in the  
117 *S. mansoni*-endemic Koome islands of Lake Victoria, Mukono district, Uganda.<sup>28</sup> We aim to enroll 480  
118 participants, randomising 240 to each intervention arm. The study cohort will recruit participants  
119 aged 9 to 17 years in primary school years 1 to 6. Adolescents<sup>29</sup> in this study setting bear a heavy  
120 parasite burden.<sup>30</sup> In addition, this age-group is a target group for vaccines against sexually  
121 transmitted infections (currently human papilloma virus [HPV] – in future, it is hoped, for vaccines  
122 against HIV) and for booster immunisations.

### 123 ***Recruitment criteria***

#### 124 *Inclusion criteria*

- 125 i. Attending the selected school and planning to continue to attend the school for the duration  
126 of the study
- 127 ii. Aged 9 to 17 years and enrolled in primary 1 to 6 (to avoid primary leaving examinations in  
128 late year 7, and loss to follow up of children leaving after primary 7)
- 129 iii. Written informed assent by participant and consent by parent or guardian
- 130 iv. Females agree to avoid pregnancy for the duration of the trial
- 131 v. Willing to provide locator information and to be contacted during the course of the trial
- 132 vi. Able and willing (in the investigator's opinion) to comply with all the study requirements

#### 133 *Exclusion criteria*

- 134 i. Clinically significant history of immunodeficiency (including HIV), cancer, cardiovascular  
135 disease, gastrointestinal disease, liver disease, renal disease, endocrine disorder and  
136 neurological illness
- 137 ii. History of serious psychiatric condition or disorder
- 138 iii. Moderate or severe acute illness characterised by any of the following symptoms: fever,  
139 impaired consciousness, convulsions, difficulty in breathing, vomiting; or as otherwise  
140 determined by the attending project clinician.
- 141 iv. Concurrent oral or systemic steroid medication or the concurrent use of other  
142 immunosuppressive agents within 2 months prior to enrolment
- 143 v. History of allergic reaction to immunisation or any allergy likely to be exacerbated by any  
144 component of the study vaccines including egg or chicken proteins

- 1  
2  
3 145 vi. History of previous immunisation with Yellow Fever (YF), oral typhoid or Human Papillomavirus  
4 146 (HPV) vaccine; previous immunisation with BCG or Tetanus and diphtheria vaccine (Td) at age  
5 147  $\geq 5$  years  
6  
7  
8 148 vii. Tendency to develop keloid scars  
9  
10 149 viii. Haemoglobin less than 82g/L  
11  
12 150 ix. Positive HIV serology  
13  
14 151 x. Positive pregnancy test  
15 152 xi. Female currently lactating, confirmed pregnancy or intention to become pregnant during the  
16 153 trial period  
17  
18 154 xii. Use of an investigational medicinal product or non-registered drug, live vaccine, or medical  
19 155 device other than the study vaccines for 30 days prior to dosing with the study vaccine, or  
20 156 planned use during the study period  
21  
22 157 xiii. Administration of immunoglobulins and/or any blood products within the three months  
23 158 preceding the planned trial immunisation date  
24  
25  
26

27 159 Further information on recruitment criteria can be found in Supplementary information.  
28

### 29 160 **Interventions**

30  
31 161 We will individually randomise participants to intensive or standard praziquantel (PZQ) treatment, in  
32 162 a 1:1 ratio. The intensive arm will receive three doses of PZQ (approximately 40mg/kg, assessed by  
33 163 height pole<sup>31</sup>) each two weeks apart prior to the first immunisation (the last of these 2-3 weeks before  
34 164 immunisation), followed by PZQ at 8 weeks (after primary endpoint sampling) and thereafter quarterly  
35 165 PZQ (approximately; timings adjusted to accommodate school terms) during follow up. The standard  
36 166 arm will receive their first dose of PZQ at week 8 (after immunisation and after primary endpoint  
37 167 sampling) and a second dose at week 52 (to conform to Uganda Ministry of Health policy, which is  
38 168 annual treatment) (**Figure 1**). No placebo will be used in this trial because all participants will be  
39 169 treated (albeit at different frequencies) and participants are unlikely to seek additional treatments  
40 170 outside the trial schedule: praziquantel treatment is not popular because of the recognised (although  
41 171 temporary) adverse effects (described in Supplementary information).  
42  
43  
44  
45  
46  
47  
48  
49

### 50 172 **Randomisation and allocation to treatment arm**

51  
52 173 A randomisation code will be generated by an independent statistician using a randomly permuted  
53 174 block size (sizes 4, 6, 8 and 10) and used to allocate participants to either receive quarterly PZQ  
54 175 (intensive arm) or annual PZQ (standard arm). A set of envelopes will be prepared, labelled  
55 176 sequentially with the randomisation numbers and containing a card indicating the corresponding  
56 177 allocation (to intensive or standard treatment). The randomisation code will be kept securely by the  
57  
58  
59  
60

178 trial statistician and made available only to those responsible for providing or preparing the trial  
 179 interventions. A second copy will be held by a data manager or statistician not otherwise involved in  
 180 the trial at the MRC/UVRI and LSHTM Uganda Research Unit. At enrolment, eligibility criteria will be  
 181 checked and eligible participants will be allocated sequentially to the next randomisation number  
 182 until the required sample size is achieved. Randomisation implementation will be done by a clinician  
 183 using the sequentially numbered opaque sealed envelopes. When the next randomisation number in  
 184 the sequence is allocated, the envelope bearing that number will be opened to reveal the allocation.

### 185 **Blinding**

186 Clinicians and participants will not be blinded to the treatment allocation since they will not  
 187 participate in outcome ascertainment; only immunology laboratory staff who are assessing trial  
 188 outcomes will be blinded.

### 189 **Immunisations**

190 We will study a portfolio of licensed vaccines (live and inert, oral and parental, priming and boosting)  
 191 expected to be beneficial (in some cases, already given) to adolescents in Uganda. Our schedule  
 192 (**Table 1**, supplementary **Table S1**) will comprise three main immunisation days (week 0, week 4 and  
 193 week 28). Additional HPV immunisation will be provided for girls aged 14 years or above, and a  
 194 second Tetanus/diphtheria boost will be given after completion of the study, to accord with the  
 195 national Expanded Programme on Immunisation (EPI) routines, but the response to these will not  
 196 specifically be assessed. Further rationale for the selection of vaccines is detailed in the  
 197 Supplementary information.

198

**Table 1. Immunisation schedule**

|                                                                                                                                                                                                                                                                                                                                                                                                                                                                                                                                        | Immunisation week 0                           | Immunisation week 4                           | [Immunisation week 8]                                   | Immunisation week 28                                      | [Immunisation week 52]                        |
|----------------------------------------------------------------------------------------------------------------------------------------------------------------------------------------------------------------------------------------------------------------------------------------------------------------------------------------------------------------------------------------------------------------------------------------------------------------------------------------------------------------------------------------|-----------------------------------------------|-----------------------------------------------|---------------------------------------------------------|-----------------------------------------------------------|-----------------------------------------------|
| <b>Live vaccines</b>                                                                                                                                                                                                                                                                                                                                                                                                                                                                                                                   | BCG vaccination / re-vaccination <sup>1</sup> | Yellow fever (YF-17D)<br>Oral typhoid (Ty21a) |                                                         |                                                           |                                               |
| <b>Non-live vaccines</b>                                                                                                                                                                                                                                                                                                                                                                                                                                                                                                               |                                               | HPV prime <sup>2</sup>                        | HPV boost for girls aged $\geq 14$ years <sup>3,4</sup> | HPV boost <sup>2</sup> and Tetanus/ diphtheria (Td) boost | Tetanus/ diphtheria (Td) boost <sup>4,5</sup> |
| 1. Prior BCG status may vary (data on history and documentation of prior BCG, and presence of a BCG scar, will be documented although these approaches have limitations for determining BCG status)<br>2. Both girls and boys will receive the HPV vaccine<br>3. The National EPI programme recommends three doses of HPV vaccine for older girls<br>4. These doses will be given to comply with guidelines but outcomes specifically relating to these doses will not be assessed<br>5. Priming by immunisation in infancy is assumed |                                               |                                               |                                                         |                                                           |                                               |

199

### 200 ***Schedule of immunisation and sampling***

201 The schedule of immunisation and sampling is outlined in **Figure 1** and **Table S1**. While optimal  
202 timings for outcome measures vary between vaccines, sampling at 8 weeks post BCG and 4 weeks  
203 post YF-17D, Ty21a, HPV and Td is proposed for the primary endpoints, targeting the establishment  
204 of memory responses and approximate peak of antibody responses. A secondary endpoint at one  
205 year will assess waning. All analyses will take baseline measurements into account. Immunisation  
206 postponement criteria are detailed in Supplementary information.

### 207 ***Outcomes***

#### 208 *Primary outcomes*

209 These will be assessed in all participants.

- 210 i. **BCG:** BCG-specific IFN- $\gamma$  ELISpot response eight weeks post BCG immunisation.
- 211 ii. **YF-17D:** neutralising antibody titres (plaque-reduction neutralisation test) at four weeks post  
212 YF immunisation.
- 213 iii. **Ty21a:** *Salmonella typhi* lipopolysaccharide (LPS)-specific immunoglobulin (Ig)G concentration  
214 at four weeks post Ty21a immunisation.
- 215 iv. **HPV:** IgG specific for L1-proteins of HPV-16/18 at four weeks post HPV priming immunisation.
- 216 v. **Td:** Tetanus and diphtheria toxoid-specific IgG concentration at four weeks post Td  
217 immunisation.

#### 218 *Secondary outcomes*

219 These will be assessed in all participants and will further investigate estimates of protective  
220 immunity (for vaccines where these are available) and dynamics of the vaccine responses, as well as  
221 the impact of the interventions on parasite clearance.

- 222 i. **Protective immunity.** Proportions with protective neutralising antibody (YF); protective IgG  
223 levels (TT);<sup>32</sup> seroconversion rates (Ty21a) at four weeks post the corresponding  
224 immunisation.
- 225 ii. **Response waning.** Primary outcome measures (all vaccines) repeated at week 52, and area-  
226 under-the curve (AUC) analyses. Parasitic infection may accelerate,<sup>33</sup> and anti-parasitic  
227 interventions delay, waning.
- 228 iii. **Priming versus boosting.** Effects on priming versus boosting will be examined for HPV only,  
229 comparing outcomes four weeks after the first, and four weeks after the second vaccine dose.

1  
2  
3 230 iv. **Current *S. mansoni* infection status and intensity** will be determined by serum/plasma levels  
4 231 of circulating anodic antigen (CAA). The method is quantitative, highly specific for *Schistosoma*  
5 232 infection, and much more sensitive than the conventional Kato Katz method.<sup>34</sup> CAA will be  
6 233 assessed retrospectively on stored samples collected at baseline, on immunisation days, and  
7 234 on primary and secondary endpoint days.

11  
12 235 Furthermore, our sample collection will offer opportunities for an array of exploratory  
13 236 immunological evaluations on stored samples, focusing mainly on vaccine antigen specific outcomes.  
14 237 Exploratory assays will provide further detail on the role of immunological profiles and trans-  
15 238 kingdom effects in mediating helminth modulation of vaccine-specific responses.

19 239 *Additional evaluation of parasite infection exposure*

- 21 240 i. **Prior exposure to schistosomiasis** will be evaluated by ELISA for IgG to schistosome egg  
22 241 antigen using stored blood samples collected at baseline.
- 23 242 ii. **The presence of other helminth infections** will be determined retrospectively using stool  
24 243 PCR of samples collected at baseline and at weeks 28 and 52.<sup>30</sup> In accordance with national  
25 244 guidelines, all participants will be treated with albendazole or mebendazole after collection  
26 245 of samples for primary endpoints at week 8 and 28, and after collection of samples for  
27 246 secondary endpoints at week 52.
- 28 247 iii. **Current malaria infection status and intensity** will be assessed retrospectively by PCR on  
29 248 stored samples collected on immunisation days and at week 52. Individuals presenting with  
30 249 fever will be investigated using rapid diagnostic tests for malaria and treated based on the  
31 250 results and according to prevailing national guidelines.
- 32 251 iv. **Prior malaria exposure** will be evaluated by ELISA for IgG to malaria antigen using stored  
33 252 samples collected at baseline.

34 253 *Sample size considerations*

35 254 Based on the literature<sup>4 35 36</sup> and preliminary data, we anticipate that, following log to base 10  
36 255 transformations that will be applied to normalise primary outcome measures, standard deviations  
37 256 (SDs) of primary outcome measures will lie between 0.3 and 0.6 on this log scale, and that effective  
38 257 treatment may increase responses by approximately 0.2 on the log scale (based on Tweyongyere *et*  
39 258 *al.*<sup>26</sup>). We have therefore powered our study to detect differences of this magnitude (0.2 on the log  
40 259 scale) or (in some cases) smaller (**Table 2**). We assume *S. mansoni* prevalence of  $\geq 80\%$ .



260 Based on these assumptions, we plan to include 480 participants in total (240 quarterly PZQ, 240  
 261 annual PZQ); of whom 384 are expected to be *S. mansoni* infected,<sup>28</sup> giving 192 participants in each  
 262 trial arm who are infected at baseline.

263 **Table 2** shows power estimates, for 5% significance level and assuming 20% loss to follow-up.

264

**Table 2. Power estimates (5% significance level)**

| Standard deviation (log <sub>10</sub> )                                                                                                                                                                                                                                                       | Difference in mean log <sub>10</sub> transformed outcome, between trial arms |      |      |      |      |      |      |
|-----------------------------------------------------------------------------------------------------------------------------------------------------------------------------------------------------------------------------------------------------------------------------------------------|------------------------------------------------------------------------------|------|------|------|------|------|------|
|                                                                                                                                                                                                                                                                                               | 0.08                                                                         | 0.10 | 0.12 | 0.14 | 0.16 | 0.18 | 0.20 |
| 192 intensive PZQ vs 192 standard PZQ ( <i>S. mansoni</i> infected only)                                                                                                                                                                                                                      |                                                                              |      |      |      |      |      |      |
| 0.3                                                                                                                                                                                                                                                                                           | 65%                                                                          | 83%  | 94%  | 98%  | >99% | >99% | >99% |
| 0.4                                                                                                                                                                                                                                                                                           | 42%                                                                          | 59%  | 75%  | 87%  | 94%  | 98%  | 99%  |
| 0.5                                                                                                                                                                                                                                                                                           | 29%                                                                          | 42%  | 56%  | 69%  | 80%  | 88%  | 94%  |
| 0.6                                                                                                                                                                                                                                                                                           | 21%                                                                          | 31%  | 42%  | 53%  | 65%  | 75%  | 83%  |
| Cells highlighted in grey correspond to >80% power; differences in mean log <sub>10</sub> transformed outcome of 0.08, 0.10, 0.12, 0.14, 0.16, 0.18 and 0.20 are equivalent to geometric mean ratios for untransformed outcomes of 1.20, 1.26, 1.32, 1.38, 1.45, 1.51 and 1.59, respectively. |                                                                              |      |      |      |      |      |      |

265

### 266 ***Ethics and dissemination***

267 Ethical approval has been granted from the Research Ethics Committee of the Uganda Virus  
 268 Research Institute (UVRI REC, reference: GC/127/19/05/664) and the London School of Hygiene and  
 269 Tropical Medicine (LSHTM, reference: 16032), and from the Uganda National Council for Science and  
 270 Technology (UNCST, reference: HS2486) and the Uganda National Drug Authority (NDA, reference:  
 271 CTA0093). Any protocol amendments will be submitted to ethics committees and regulatory bodies  
 272 for approval before implementation.

273 Participants are adolescents and therefore a vulnerable human population. Care will be taken to  
 274 provide adequate, age and education-status appropriate information and to ensure that it is  
 275 understood; and to emphasise that participation is voluntary. Participants will be enrolled only when  
 276 they have given their own assent and when consent has been given by the parent or guardian. No  
 277 major risks to the participants are anticipated since all the treatments and vaccines to be given are  
 278 licensed and known to be safe. The main risk to participants will be time lost from school work: we  
 279 will work with teachers and parents to minimise disruption to classes, and will avoid enrolment of  
 280 primary 7 students since these classes are involved in national examinations. Further risks are  
 281 discussed in Supplementary information.

282 Study findings will be published through open access peer-reviewed journals, presentations at local,  
 283 national and international conferences and to the local community through community meetings.  
 284 Anonymised participant level datasets generated will be available upon request.

1  
2  
3 285 ***Patient and public involvement***  
4

5 286 Concepts involved in this work have been discussed with colleagues at the Vector Control Division  
6  
7 287 and Expanded Programme on Immunisation in the Ministry of Health (Uganda), with the Mukono  
8  
9 288 District Council and with community leaders and Village Health Teams from Koome subcounty. We  
10  
11 289 also have held meetings to explain the proposed work to teachers, parents, participants and village  
12  
13 290 members, and to address their questions about issues such as study length, the study's ethical  
14  
15 291 approval status, why adults were excluded from the study, and to explain to them why boys will also  
16  
17 292 receive the HPV vaccine. Study findings will be shared with these stakeholders and with participants.

18 293 ***Data management and analysis***  
19

20 294 Socio-demographic information and clinical and laboratory measurements will be recorded and  
21  
22 295 managed using Research Electronic Data Capture (REDCap) tools,<sup>37 38</sup> with paper-based forms as  
23  
24 296 back-up. All data will be recorded under a unique study ID number. When paper forms must be  
25  
26 297 used, data will be double entered in a study-specific database, with standard checks for  
27  
28 298 discrepancies. All data for analysis will be anonymised and stored on a secure and password-  
29  
30 299 protected server, with access limited to essential research personnel.

31 300 Baseline characteristics will be summarised by trial arm, and the effect of intensive (compared to  
32  
33 301 standard) praziquantel treatment on the outcomes will be analysed. Information on infection status  
34  
35 302 will only be available after randomisation. The primary analysis will be done on individuals identified  
36  
37 303 as infected at baseline (through randomisation, these will be balanced between treatment arms);  
38  
39 304 this will test the hypothesis that treating the infection (and subsequent reinfections) reverses the  
40  
41 305 parasite's effects on vaccine responses. If treating *S. mansoni* reverses adverse parasite effects on  
42  
43 306 vaccine responses, this may be a beneficial public health intervention. However, routine screening  
44  
45 307 for parasite infection before immunisation would be laborious. Secondary analyses will include all  
46  
47 308 randomised individuals; this will provide insight into the broader benefit of the interventions as  
48  
49 309 public health measures. The effect of intensive versus standard praziquantel treatment on primary  
50  
51 310 outcomes will be assessed using unpaired t-tests, with results presented as a mean difference in  
52  
53 311 vaccine response measure together with 95% confidence interval and p-value. We anticipate that  
54  
55 312 outcomes will be positively skewed, and will apply log transformations to normalise distributions  
56  
57 313 before analysis if required. The detailed analytical plan is available on the online trial registration site  
58  
59 314 (<http://www.isrctn.com/ISRCTN60517191>).  
60

## 315 Discussion

316 This will be the first adequately powered intervention study to investigate the effect of  
317 schistosomiasis treatment on vaccine responses in adolescents. This study will determine whether *S.*  
318 *mansoni* infection has a causal, reversible, impact on the response to live or inert vaccines, including  
319 effects on vaccine replication, immune response profile, priming, boosting and waning. The results  
320 will add to understanding of population differences in vaccine responses and on interventions that  
321 may enhance responses. If treating helminths improves vaccine responses in adolescents, combined  
322 parasite-control/immunisation programmes offer an attractive, practical public health intervention  
323 for schools and communities.

324 There are risks associated with our approach to addressing the trial objective. **First**, there is a risk of  
325 failure to clear *S. mansoni* infections, and repeated reinfection during the trial. This issue can be  
326 challenging because of incomplete cure or maturation of immature worms after treatment, and  
327 lifestyles in endemic communities that result in repeated exposure. To mitigate this, we will  
328 administer three PZQ treatments over a six-week period before the first immunisations, and  
329 continuing quarterly treatment in the intensive arm. **Second**, there is a risk that *S. mansoni* infection  
330 has long-term effects, not removed by treatment, mediated, for example, by epigenetic change.<sup>39</sup>  
331 However, studies show that parasite treatment results in immunological changes,<sup>40,41</sup> and our data  
332 suggest at least partial recovery of the measles vaccine response among young children treated for  
333 schistosomiasis.<sup>26</sup> By initiating intervention six to eight weeks before the first immunisations, and  
334 providing repeated intervention in the intensive arms, we hope to achieve significant resolution of *S.*  
335 *mansoni* effects.

336 We are interested in the effects of removing *S. mansoni*. Treating parasites can induce acute  
337 immunological change due to release of previously hidden antigens.<sup>42,43</sup> To minimise such effects,  
338 immunisations will be given at least 2 weeks after PZQ (the longest practicable interval; **Figure 1**).

339 Laboratory analyses will also highlight immune parameters and cellular populations that link  
340 environmental exposures to vaccine responses. Identifying processes associated with poor or good  
341 outcomes will inform strategies in vaccine design (for example, the genetic modification of vaccines,  
342 or innovative use of adjuvants, to counter any adverse immunological milieu, currently an area of  
343 intense research for cancer vaccines<sup>44</sup>); ultimately supporting the development of effective vaccines  
344 tailored to the low-income settings that most need them.

345

## 346 Study timeline

1  
2  
3 347 Applications for ethical approval were submitted in May 2018, with approval received in September  
4  
5 348 2018 (Uganda Virus Research Institute Research Ethics Committee), May 2019 (National Drug  
6  
7 349 Authority and Uganda National Council for Science and Technology), June 2019 (London School of  
8  
9 350 Hygiene and Tropical Medicine). Collaborator/investigator/trial steering committee meetings were  
10  
11 351 also held during the initial 12-month planning period. The study began recruitment in July 2019.  
12  
13 352 Intervention will be up to 12 months, with completion of the project scheduled for September 2020.  
14

15 353

### 16 354 **Competing interests**

17  
18 355 Alison Elliott reports a grant from the Medical research Council, UK (POPVAC programme funding).  
19  
20 356 The rest of the authors declare that they have no conflicts of interest.

### 21 357 **Author contributions**

22  
23  
24 358 AME conceived the study. AME, GN, ELW, AN, JN, SC, LZ and JK contributed to study design. LZ, GO,  
25  
26 359 PNK, EN, GK, RA, CN, CO, MN, CZ, SA and FA are site clinicians/nurses/clinical laboratory technicians  
27  
28 360 providing valuable input on clinical considerations of the intervention. MS, SK and RK are field  
29  
30 361 workers handling the organisational integration of the intervention. AN, AM and ELW are involved in  
31  
32 362 organisation of the databases, trial randomization, treatment allocation and drawing up of analytical  
33  
34 363 plans. GN, LZ, JN, AN, SC, ELW and AME drafted the manuscript. All authors reviewed the  
35  
36 364 manuscript, contributed to it and approved the final version.

### 36 365 **Acknowledgements**

37  
38  
39 366 We thank the Uganda National Expanded Programme for Immunisation, Sanofi Pasteur and PaxVax  
40  
41 367 for providing the HPV, yellow fever and oral typhoid vaccines, respectively. The BCG and tetanus-  
42  
43 368 diphtheria vaccines were kind donations from the Serum Institute of India. We thank the Vector  
44  
45 369 Control Division of the Ministry of Health and the Mukono district local government for their  
46  
47 370 support. We also thank members of the POPVAC programme steering committee (chaired by Prof.  
48  
49 371 Richard Hayes) and the Data and Safety Monitoring Board (Dr David Meya, Prof Andrew Prendergast  
50  
51 372 and Dr Elizabeth George).

### 51 373 **Funding**

52  
53 374 The POPVAC programme of work is supported by the Medical Research Council of the United  
54  
55 375 Kingdom (grant number MR/R02118X/1). SC and JN are supported in part by the Makerere  
56  
57 376 University – Uganda Virus Research Institute Centre of Excellence for Infection and Immunity  
58  
59 377 Research and Training (MUII-plus). MUII-plus is funded under the DELTAS Africa Initiative. The  
60  
61 378 DELTAS Africa Initiative is an independent funding scheme of the African Academy of Sciences (AAS),

1  
2  
3 379 Alliance for Accelerating Excellence in Science in Africa (AESAs) and supported by the New  
4  
5 380 Partnership for Africa's Development Planning and Coordinating Agency (NEPAD Agency) with  
6  
7 381 funding from the Wellcome Trust (grant 107743) and the UK Government. The MRC/UVRI and  
8  
9 382 LSHTM Uganda Research Unit is jointly funded by the UK Medical Research Council (MRC) and the  
10  
11 383 UK Department for International Development (DFID) under the MRC/DFID Concordat agreement  
12  
13 384 and is also part of the EDCTP2 programme supported by the European Union.

14 385 The study sponsor (London School of Hygiene and Tropical Medicine) and funders had no role in  
15  
16 386 study design; collection, management, analysis, and interpretation of data; writing of the protocol;  
17  
18 387 and the decision to submit the protocol for publication.

19 388 **POPVAC trial team**

20  
21 389 **Principal investigator:** Alison Elliott; **Project leader:** Ludoviko Zirimenya; **laboratory staff:** Gyaviira  
22  
23 390 Nkurunungi, Stephen Cose, Rebecca Amongin, Beatrice Nassanga, Jacent Nassuuna, Irene Nambuya,  
24  
25 391 Prossy Kabuubi, Emmanuel Niwagaba, Gloria Oduru, Grace Kabami; **statisticians and data**  
26  
27 392 **managers:** Emily Webb, Agnes Natukunda, Helen Akurut, Alex Mutebe; **clinicians:** Anne Wajja, Milly  
28  
29 393 Namutebi, Christopher Zziwa, Joel Serubanja; **nurses:** Caroline Onen, Esther Nakazibwe, Josephine  
30  
31 394 Tumusiime, Caroline Ninsiima, Susan Amongi, Florence Akello; **internal monitor:** Mirriam  
32  
33 395 Akello; **field workers:** Robert Kizindo, Moses Sewankambo, Denis Nsubuga, Samuel Kiwanuka, Fred  
34  
35 396 Kiwudhu; **boatman:** David Abiriga; **administrative management:** Moses Kizza, Samsi Nansukusa;  
36  
37 397 **internal and external collaborators:** Pontiano Kaleebu, Hermelijn Smits, Maria Yazdanbakhsh,  
38  
39 398 Govert van Dam, Paul Corstjens, Sarah Staedke, Henry Luzze, James Kaweesa, Edridah Tukahebwa,  
40  
41 399 Elly Tumushabe, Moses Muwanga

400 **References**

- 401 1. Taniuchi M, Platts-Mills JA, Begum S, et al. Impact of enterovirus and other enteric pathogens on oral polio  
402 and rotavirus vaccine performance in Bangladeshi infants. *Vaccine* 2016;34(27):3068-75. doi:  
403 10.1016/j.vaccine.2016.04.080 [published Online First: 2016/05/08]
- 404 2. Fine PE. Variation in protection by BCG: implications of and for heterologous immunity. *Lancet*  
405 1995;346(8986):1339-45.
- 406 3. Black GF, Weir RE, Floyd S, et al. BCG-induced increase in interferon-gamma response to mycobacterial  
407 antigens and efficacy of BCG vaccination in Malawi and the UK: two randomised controlled studies. *Lancet*  
408 2002;359(9315):1393-401. doi: 10.1016/S0140-6736(02)08353-8
- 409 4. Muyanja E, Ssemaganda A, Ngauv P, et al. Immune activation alters cellular and humoral responses to  
410 yellow fever 17D vaccine. *The Journal of clinical investigation* 2014;124(7):3147-58. doi: 10.1172/jci75429  
411 [published Online First: 2014/06/10]
- 412 5. Barreto ML, Pilger D, Pereira SM, et al. Causes of variation in BCG vaccine efficacy: examining evidence from  
413 the BCG REVAC cluster randomized trial to explore the masking and the blocking hypotheses. *Vaccine*  
414 2014;32(30):3759-64. doi: 10.1016/j.vaccine.2014.05.042
- 415 6. Tanner R, Kakalacheva K, Miller E, et al. Serum indoleamine 2,3-dioxygenase activity is associated with  
416 reduced immunogenicity following vaccination with MVA85A. *BMC infectious diseases* 2014;14:660. doi:  
417 10.1186/s12879-014-0660-7 [published Online First: 2014/12/04]
- 418 7. Sissoko MS, Healy SA, Katile A, et al. Safety and efficacy of PfSPZ Vaccine against *Plasmodium falciparum* via  
419 direct venous inoculation in healthy malaria-exposed adults in Mali: a randomised, double-blind phase 1 trial.  
420 *The Lancet Infectious diseases* 2017;17(5):498-509. doi: 10.1016/s1473-3099(17)30104-4 [published Online  
421 First: 2017/02/22]
- 422 8. Venkatraman N, Ndiaye BP, Bowyer G, et al. Safety and Immunogenicity of a Heterologous Prime-Boost  
423 Ebola Virus Vaccine Regimen in Healthy Adults in the United Kingdom and Senegal. *The Journal of infectious*  
424 *diseases* 2018;219(8):1187-97. doi: 10.1093/infdis/jiy639
- 425 9. Barreto ML, Pereira SM, Pilger D, et al. Evidence of an effect of BCG revaccination on incidence of  
426 tuberculosis in school-aged children in Brazil: second report of the BCG-REVAC cluster-randomised trial.  
427 *Vaccine* 2011;29(31):4875-7. doi: 10.1016/j.vaccine.2011.05.023
- 428 10. van Riet E, Adegnika AA, Retra K, et al. Cellular and humoral responses to influenza in gabonese children  
429 living in rural and semi-urban areas. *The Journal of infectious diseases* 2007;196(11):1671-8. doi:  
430 10.1086/522010 [published Online First: 2007/11/17]
- 431 11. van Riet E, Retra K, Adegnika AA, et al. Cellular and humoral responses to tetanus vaccination in Gabonese  
432 children. *Vaccine* 2008;26(29-30):3690-5. doi: 10.1016/j.vaccine.2008.04.067 [published Online First:  
433 2008/06/10]
- 434 12. Venkatraman N, Ndiaye BP, Bowyer G, et al. Safety and Immunogenicity of a Heterologous Prime-Boost  
435 Ebola Virus Vaccine Regimen in Healthy Adults in the United Kingdom and Senegal. *The Journal of infectious*  
436 *diseases* 2019;219(8):1187-97. doi: 10.1093/infdis/jiy639
- 437 13. Brandt L, Feino Cunha J, Weinreich Olsen A, et al. Failure of the *Mycobacterium bovis* BCG vaccine: some  
438 species of environmental mycobacteria block multiplication of BCG and induction of protective immunity to  
439 tuberculosis. *Infection and immunity* 2002;70(2):672-8. [published Online First: 2002/01/18]
- 440 14. Flaherty DK, Vesosky B, Beamer GL, et al. Exposure to *Mycobacterium avium* can modulate established  
441 immunity against *Mycobacterium tuberculosis* infection generated by *Mycobacterium bovis* BCG vaccination.



- 1  
2  
3 442 *Journal of leukocyte biology* 2006;80(6):1262-71. doi: 10.1189/jlb.0606407 [published Online First:  
4 443 2006/09/14]  
5  
6 444 15. Maizels RM, McSorley HJ. Regulation of the host immune system by helminth parasites. *The Journal of*  
7 445 *allergy and clinical immunology* 2016;138(3):666-75. doi: 10.1016/j.jaci.2016.07.007 [published Online First:  
8 446 2016/08/02]  
9  
10 447 16. Wammes LJ, Mpairwe H, Elliott AM, et al. Helminth therapy or elimination: epidemiological,  
11 448 immunological, and clinical considerations. *The Lancet Infectious diseases* 2014;14(11):1150-62. doi:  
12 449 10.1016/S1473-3099(14)70771-6  
13  
14 450 17. Wammes LJ, Hamid F, Wiria AE, et al. Regulatory T cells in human geohelminth infection suppress immune  
15 451 responses to BCG and *Plasmodium falciparum*. *Eur J Immunol* 2010;40(2):437-42. doi: 10.1002/eji.200939699  
16  
17 452 18. Pfeiffer JK, Virgin HW. Viral immunity. Transkingdom control of viral infection and immunity in the  
18 453 mammalian intestine. *Science* 2016;351(6270) doi: 10.1126/science.aad5872  
19  
20 454 19. Onguru D, Liang Y, Griffith Q, et al. Human schistosomiasis is associated with endotoxemia and Toll-like  
21 455 receptor 2- and 4-bearing B cells. *The American journal of tropical medicine and hygiene* 2011;84(2):321-4.  
22 456 doi: 10.4269/ajtmh.2011.10-0397 [published Online First: 2011/02/05]  
23  
24 457 20. George PJ, Anuradha R, Kumar NP, et al. Evidence of microbial translocation associated with perturbations  
25 458 in T cell and antigen-presenting cell homeostasis in hookworm infections. *PLoS neglected tropical diseases*  
26 459 2012;6(10):e1830. doi: 10.1371/journal.pntd.0001830 [published Online First: 2012/10/12]  
27  
28 460 21. Rajamanickam A, Munisankar S, Bhootra Y, et al. Microbial Translocation Associated with an Acute-Phase  
29 461 Response and Elevations in MMP-1, HO-1, and Proinflammatory Cytokines in *Strongyloides stercoralis*  
30 462 Infection. *Infection and immunity* 2017;85(1) doi: 10.1128/iai.00772-16 [published Online First: 2016/11/09]  
31  
32 463 22. Sanya RE, Nkurunungi G, Andia Biraro I, et al. A life without worms. *Transactions of the Royal Society of*  
33 464 *Tropical Medicine and Hygiene* 2017:1-9. doi: 10.1093/trstmh/trx010 [published Online First: 2017/03/25]  
34  
35 465 23. Elias D, Britton S, Aseffa A, et al. Poor immunogenicity of BCG in helminth infected population is associated  
36 466 with increased in vitro TGF-beta production. *Vaccine* 2008;26(31):3897-902. doi: S0264-410X(08)00540-9  
37 467 [pii]  
38 468 10.1016/j.vaccine.2008.04.083 [published Online First: 2008/06/17]  
39  
40 469 24. Elias D, Wolday D, Akuffo H, et al. Effect of deworming on human T cell responses to mycobacterial  
41 470 antigens in helminth-exposed individuals before and after bacille Calmette-Guerin (BCG) vaccination. *Clin Exp*  
42 471 *Immunol* 2001;123(2):219-25.  
43  
44 472 25. Cooper PJ, Chico ME, Losonsky G, et al. Albendazole treatment of children with ascariasis enhances the  
45 473 vibriocidal antibody response to the live attenuated oral cholera vaccine CVD 103-HgR. *The Journal of*  
46 474 *infectious diseases* 2000;182(4):1199-206. doi: 10.1086/315837 [published Online First: 2000/09/09]  
47  
48 475 26. Tweyongyere R, Nassanga BR, Muhwezi A, et al. Effect of *Schistosoma mansoni* infection and its treatment  
49 476 on antibody responses to measles catch-up immunisation in pre-school children: A randomised trial. *PLoS*  
50 477 *neglected tropical diseases* 2019;13(2):e0007157. doi: 10.1371/journal.pntd.0007157 [published Online First:  
51 478 2019/02/15]  
52  
53 479 27. Chan AW, Tetzlaff JM, Altman DG, et al. SPIRIT 2013 statement: defining standard protocol items for  
54 480 clinical trials. *Ann Intern Med* 2013;158(3):200-7. doi: 10.7326/0003-4819-158-3-201302050-00583  
55 481 [published Online First: 2013/01/09]  
56  
57 482 28. Sanya RE, Nkurunungi G, Hoek Spaans R, et al. The Impact of Intensive Versus Standard Anthelmintic  
58 483 Treatment on Allergy-related Outcomes, Helminth Infection Intensity, and Helminth-related Morbidity in  
59 484 Lake Victoria Fishing Communities, Uganda: Results From the LaVIISWA Cluster-randomized Trial. *Clinical*

- 1  
2  
3 485 *infectious diseases : an official publication of the Infectious Diseases Society of America* 2019;68(10):1665-74.  
4 486 doi: 10.1093/cid/ciy761 [published Online First: 2018/09/12]  
5  
6 487 29. WHO. Adolescent Health Research Priorities: Report of a Technical Consultation 2015.  
7 488 [http://apps.who.int/iris/bitstream/10665/203564/1/WHO\\_FWC\\_MCA\\_15\\_07\\_eng.pdf?ua=1](http://apps.who.int/iris/bitstream/10665/203564/1/WHO_FWC_MCA_15_07_eng.pdf?ua=1) (accessed 17th  
8 489 May 2019).  
9  
10 490 30. Webb EL, Nampijja M, Kaweesa J, et al. Helminths are positively associated with atopy and wheeze in  
11 491 Ugandan fishing communities: results from a cross-sectional survey. *Allergy* 2016 doi: 10.1111/all.12867  
12  
13 492 31. Montresor A, Odermatt P, Muth S, et al. The WHO dose pole for the administration of praziquantel is also  
14 493 accurate in non-African populations. *Transactions of the Royal Society of Tropical Medicine and Hygiene*  
15 494 2005;99(1):78-81. doi: 10.1016/j.trstmh.2004.06.006  
16  
17 495 32. Plotkin SA. Correlates of protection induced by vaccination. *Clinical and vaccine immunology : CVI*  
18 496 2010;17(7):1055-65. doi: 10.1128/cvi.00131-10 [published Online First: 2010/05/14]  
19  
20 497 33. Riner DK, Ndombi EM, Carter JM, et al. Schistosoma mansoni Infection Can Jeopardize the Duration of  
21 498 Protective Levels of Antibody Responses to Immunizations against Hepatitis B and Tetanus Toxoid. *PLoS*  
22 499 *neglected tropical diseases* 2016;10(12):e0005180. doi: 10.1371/journal.pntd.0005180  
23  
24 500 34. Corstjens PL, Nyakundi RK, de Dood CJ, et al. Improved sensitivity of the urine CAA lateral-flow assay for  
25 501 diagnosing active Schistosoma infections by using larger sample volumes. *Parasites & vectors* 2015;8:241.  
26 502 doi: 10.1186/s13071-015-0857-7 [published Online First: 2015/04/22]  
27  
28 503 35. Fletcher HA, Snowden MA, Landry B, et al. T-cell activation is an immune correlate of risk in BCG vaccinated  
29 504 infants. *Nat Commun* 2016;7:11290. doi: 10.1038/ncomms11290  
30  
31 505 36. Safaeian M, Porras C, Pan Y, et al. Durable antibody responses following one dose of the bivalent human  
32 506 papillomavirus L1 virus-like particle vaccine in the Costa Rica Vaccine Trial. *Cancer prevention research*  
33 507 *(Philadelphia, Pa)* 2013;6(11):1242-50. doi: 10.1158/1940-6207.capr-13-0203 [published Online First:  
34 508 2013/11/06]  
35  
36 509 37. Harris PA, Taylor R, Minor BL, et al. The REDCap Consortium: Building an International Community of  
37 510 Software Platform Partners. *Journal of biomedical informatics* 2019;103208. doi: 10.1016/j.jbi.2019.103208  
38 511 [published Online First: 2019/05/13]  
39  
40 512 38. Harris PA, Taylor R, Thielke R, et al. Research electronic data capture (REDCap)--a metadata-driven  
41 513 methodology and workflow process for providing translational research informatics support. *Journal of*  
42 514 *biomedical informatics* 2009;42(2):377-81. doi: 10.1016/j.jbi.2008.08.010 [published Online First:  
43 515 2008/10/22]  
44  
45 516 39. Blok BA, Arts RJ, van Crevel R, et al. Trained innate immunity as underlying mechanism for the long-term,  
46 517 nonspecific effects of vaccines. *J Leukoc Biol* 2015;98(3):347-56. doi: 10.1189/jlb.5RI0315-096R  
47  
48 518 40. Watanabe K, Mwinzi PN, Black CL, et al. T regulatory cell levels decrease in people infected with  
49 519 Schistosoma mansoni on effective treatment. *The American journal of tropical medicine and hygiene*  
50 520 2007;77(4):676-82. [published Online First: 2007/11/06]  
51  
52 521 41. Schmiedel Y, Mombo-Ngoma G, Labuda LA, et al. CD4+CD25hiFOXP3+ Regulatory T Cells and Cytokine  
53 522 Responses in Human Schistosomiasis before and after Treatment with Praziquantel. *PLoS neglected tropical*  
54 523 *diseases* 2015;9(8):e0003995. doi: 10.1371/journal.pntd.0003995 [published Online First: 2015/08/21]  
55  
56 524 42. van den Biggelaar AHJ, Borrmann S, Kremsner P, et al. Immune Responses Induced by Repeated Treatment  
57 525 Do Not Result in Protective Immunity to Schistosoma haematobium: Interleukin (IL)-5 and IL-10 Responses.  
58 526 *The Journal of infectious diseases* 2002;186(10):1474-82. doi: 10.1086/344352  
59  
60



- 1  
2  
3 527 43. Woolhouse MEJ, Hagan P. Seeking the ghost of worms past. *Nature Medicine* 1999;5(11):1225-27. doi:  
4 528 10.1038/15169  
5  
6 529 44. Seledtsov VI, Goncharov AG, Seledtsova GV. Clinically feasible approaches to potentiating cancer cell-based  
7 530 immunotherapies. *Human vaccines & immunotherapeutics* 2015;11(4):851-69. doi:  
8 531 10.1080/21645515.2015.1009814 [published Online First: 2015/05/02]  
9 532

10  
11  
12 533

13  
14  
15 534 **FIGURE LEGENDS**

16  
17 535 **Figure 1. Outline of immunisations and anthelmintic intervention**

18  
19 536 <sup>1</sup>Primary endpoints will be at eight weeks post BCG and four weeks post Yellow fever (YF-17D), oral  
20 537 typhoid (Ty21a), Human Papilloma Virus (HPV) and Tetanus/diphtheria (Td) vaccination.

21  
22 538 <sup>2</sup>Primary endpoint for responses to Td given at 28 weeks.  
23

24 539  
25  
26  
27  
28  
29  
30  
31  
32  
33  
34  
35  
36  
37  
38  
39  
40  
41  
42  
43  
44  
45  
46  
47  
48  
49  
50  
51  
52  
53  
54  
55  
56  
57  
58  
59  
60

1  
2  
3  
4  
5  
6  
7  
8  
9  
10  
11  
12  
13  
14  
15  
16  
17  
18  
19  
20  
21  
22  
23  
24  
25



 praziquantel; 
  - - - immunisations; 
 PE  primary endpoint; 
 SE  secondary endpoint  
 standard arm, no praziquantel

1  
2  
3 **SUPPLEMENTARY INFORMATION**  
4

5  
6  
7  
8 **The effect of intensive treatment for schistosomiasis on immune responses to vaccines among**  
9 **rural Ugandan island adolescents: randomised controlled trial protocol A for the ‘POPulation**  
10 **differences in VACCine responses’ (POPVAC) programme**  
11

12 Gyaviira Nkurunungi<sup>1,¶,\*</sup>, Ludoviko Zirimenya<sup>1,¶</sup>, Jacent Nassuuna<sup>1,¶</sup>, Agnes Natukunda<sup>1,¶</sup>, Prossy N  
13 Kabuubi<sup>1</sup>, Emmanuel Niwagaba<sup>1</sup>, Gloria Oduru<sup>1</sup>, Grace Kabami<sup>1</sup>, Rebecca Amongin<sup>1</sup>, Alex Mutebe<sup>1</sup>,  
14 Milly Namutebi<sup>1</sup>, Christopher Zziwa<sup>1</sup>, Susan Amongi<sup>1</sup>, Caroline Ninsiima<sup>1</sup>, Caroline Onen<sup>1</sup>, Florence  
15 Akello<sup>1</sup>, Moses Sewankambo<sup>1</sup>, Samuel Kiwanuka<sup>1</sup>, Robert Kizindo<sup>1</sup>, James Kaweesa<sup>2</sup>, Stephen Cose<sup>1,3</sup>,  
16 Emily L Webb<sup>4</sup>, Alison M Elliott<sup>1,3</sup> **for the POPVAC trial team**  
17  
18

19  
20  
21  
22  
23  
24 <sup>1</sup>Immunomodulation and Vaccines Programme, Medical Research Council/Uganda Virus Research  
25 Institute and London School of Hygiene and Tropical Medicine (MRC/UVRI and LSHTM) Uganda  
26  
27 Research Unit, Entebbe, Uganda  
28

29  
30 <sup>2</sup>Vector Control Division, Ministry of Health, Kampala, Uganda  
31

32  
33 <sup>3</sup>Department of Clinical Research, London School of Hygiene and Tropical Medicine, London, United  
34 Kingdom  
35

36  
37 <sup>4</sup>MRC Tropical Epidemiology Group, Department of Infectious Disease Epidemiology, London School  
38 of Hygiene and Tropical Medicine, London, United Kingdom  
39

40 <sup>¶</sup>These authors contributed equally  
41

42 **\*Correspondence:** Gyaviira Nkurunungi; [Gyaviira.Nkurunungi@mrcuganda.org](mailto:Gyaviira.Nkurunungi@mrcuganda.org)  
43  
44  
45  
46  
47  
48  
49  
50  
51  
52  
53  
54  
55  
56  
57  
58  
59  
60

Table S1. Schedule of visits and procedures

| VISIT NUMBER                                                                                                                                  | 1               | 2 & 3                     | 4             | 5 <sup>9</sup> | 5.2             | 6                                    | 7       | 8             | 9                                       | 10      | 11                |
|-----------------------------------------------------------------------------------------------------------------------------------------------|-----------------|---------------------------|---------------|----------------|-----------------|--------------------------------------|---------|---------------|-----------------------------------------|---------|-------------------|
| WEEKS FROM 1 <sup>ST</sup> IMMUNISATION                                                                                                       | -8 <sup>1</sup> | -6 <sup>10</sup> , -4, -2 | 0             | 4              | 4 weeks +4 days | 8                                    | 20      | 28            | 32                                      | 44      | 52                |
|                                                                                                                                               | Screening       | Treatment (Rx) only       | Immunisations | Immunisations  |                 | Primary Endpoint (PE), Immunisations | Rx only | Immunisations | PE/Secondary Endpoint (SE) <sup>2</sup> | Rx only | SE, Immunisations |
| <b>RANDOMISED INTENSIVE VS STANDARD PRAZIQUANTEL INTERVENTION</b>                                                                             |                 |                           |               |                |                 |                                      |         |               |                                         |         |                   |
| PZQ intensive arm (x)                                                                                                                         |                 | x                         |               |                |                 | x <sup>3</sup>                       | x       |               | x <sup>3</sup>                          | x       | x <sup>3</sup>    |
| PZQ standard arm                                                                                                                              |                 |                           |               |                |                 | x <sup>3</sup>                       |         |               |                                         |         | x <sup>3</sup>    |
| Albendazole                                                                                                                                   |                 |                           |               |                |                 | x <sup>3</sup>                       |         |               | x <sup>3</sup>                          |         | x <sup>3</sup>    |
| <b>VACCINES</b>                                                                                                                               |                 |                           |               |                |                 |                                      |         |               |                                         |         |                   |
| BCG                                                                                                                                           |                 |                           | x             |                |                 |                                      |         |               |                                         |         |                   |
| YF-17D                                                                                                                                        |                 |                           |               | x              |                 |                                      |         |               |                                         |         |                   |
| Ty21a                                                                                                                                         |                 |                           |               | x              |                 |                                      |         |               |                                         |         |                   |
| HPV                                                                                                                                           |                 |                           |               | x              |                 | [x] <sup>4</sup>                     |         | x             |                                         |         |                   |
| Td                                                                                                                                            |                 |                           |               |                |                 |                                      |         | x             |                                         |         | [x] <sup>5</sup>  |
| <b>INVESTIGATIONS/PROCEDURES</b>                                                                                                              |                 |                           |               |                |                 |                                      |         |               |                                         |         |                   |
| Inclusion/exclusion criteria                                                                                                                  | x               |                           |               |                |                 |                                      |         |               |                                         |         |                   |
| Informed consent                                                                                                                              | x               |                           |               |                |                 |                                      |         |               |                                         |         |                   |
| Questionnaire                                                                                                                                 | x               |                           | x             | x              | x               | x                                    |         | x             | x                                       |         | x                 |
| Examination                                                                                                                                   | x               |                           | (x)           | (x)            | (x)             | (x)                                  |         | (x)           | (x)                                     |         | (x)               |
| Urine β-HCG test (female only) 1mL                                                                                                            | x               |                           | x             | x              |                 |                                      |         | x             |                                         |         |                   |
| Urine YF viral load                                                                                                                           |                 |                           |               |                | x               |                                      |         |               |                                         |         |                   |
| Stool for PCR and storage                                                                                                                     | x               |                           |               |                |                 |                                      |         | x             |                                         |         | x                 |
| Stool for coproantibody and storage                                                                                                           | x               |                           |               |                |                 | x                                    |         |               |                                         |         |                   |
| <b>BLOOD SAMPLES</b>                                                                                                                          |                 |                           |               |                |                 |                                      |         |               |                                         |         |                   |
| Malaria PCR (1ml)                                                                                                                             |                 |                           | x             | x              |                 |                                      |         | x             |                                         |         | x                 |
| Serology for HIV, prior malaria and <i>S. mansoni</i> (0.5ml)                                                                                 | x               |                           |               |                |                 |                                      |         |               |                                         |         |                   |
| Mansonella perstans (1ml)                                                                                                                     | x               |                           |               |                |                 |                                      |         |               |                                         |         |                   |
| Serum/plasma CAA (1ml)                                                                                                                        | x               |                           | x             | x              |                 | x                                    |         | x             | x                                       |         | x                 |
| Hb <sup>8</sup> / Full blood count (0.5ml)                                                                                                    | x               |                           | x             | x              |                 |                                      |         | x             |                                         |         |                   |
| Assessments of pre-immunisation responses, and/or vaccine response outcomes and/or exploratory immunology; storage <sup>7</sup> (10 – 20 mls) |                 |                           | x             | x              |                 | x                                    |         | x             | x                                       |         | x                 |
| Blood for gene expression (2mls)                                                                                                              |                 |                           | x             | x              |                 |                                      |         | x             |                                         |         |                   |
| Blood vol (mL)                                                                                                                                | 4               |                           | 27            | 17             |                 | 10-20                                |         | 27            | 10                                      |         | 14                |
| Cumulative blood vol (mL) <sup>7</sup>                                                                                                        | 4               |                           | 31            | 48             |                 | 68                                   |         | 95            | 105                                     |         | 119               |

1  
2  
3 **PE:** primary endpoint; **SE:** secondary endpoint; **Rx only:** treatment only

4 Immunisation days highlighted in green, primary end point days in red, days for treatment only in grey

5 (x) performed if clinically indicated

6 1. Screening and enrolment into Project A will take place about 8 weeks before immunisation 0 to allow initiation of the praziquantel intervention.

7 2. Week 32 is primary endpoint for responses to Td given at 28 weeks; secondary endpoint for HPV booster

8 3. Treatments given after sampling when schedules coincide

9 4. Week 8 HPV dose will be given for previously-unvaccinated girls aged  $\geq 14$  years

10 5. Week 52 Td booster dose will be provided as a service

11 6. Exploratory immunology blood volume will be guided by guidelines from Harvard Mass General, where a maximum of 3ml/kg body weight is taken at any one time point and not more than 3ml/kg is taken over any 8-week period (ref [http://www.drgreene.com/21\\_1616.html](http://www.drgreene.com/21_1616.html).) These guidelines have been followed in a previous study vaccinating adolescents with investigational tuberculosis vaccine MVA85A (in Uganda).<sup>1</sup> The total blood volume planned is 68 ml over the initial intensive sampling period of 8 weeks. Revision of sample volumes based on weight will only be required for participants who weigh less than 22 kg; the average weight of children aged 9 years is expected to be 28kg (with 21kg the 3rd centile) with greater weights for older children.<sup>2</sup>

13 7. At baseline, it will only be Hb estimation by Haemocue

14 8. Oral typhoid vaccine doses will be administered on three alternate days namely visit 5, 5.1 and 5.2.

15 9. The first PZQ treatment at week -6 will be administered at the end of the screening visit

16 22

### 23 **Further information on recruitment criteria**

- 24 • Participants who are excluded from the trial because they have been discovered (during  
25 screening procedures) to be suffering from a previously undiagnosed condition thought to  
26 require further medical attention will be referred appropriately for further investigation and  
27 treatment.
- 28 • Participants discovered to have severe anaemia will be excluded from the trial and treated  
29 for anaemia
- 30 • Participants discovered to be HIV-positive will be counselled and offered a CD4 T-cell count  
31 and referred to a provider of antiretroviral treatment (“Test and Treat” – i.e. initiation of  
32 treatment regardless of CD4 count is recommended for these high-risk communities).
- 33 • Participants discovered to be pregnant will be counselled and referred to an antenatal clinic  
34 of their choice.

35 This trial proposes to recruit all participants within a short time-frame. It will not, therefore, be  
36 possible to reconsider enrolment of potential participants with temporary exclusion criteria after  
37 treatment and resolution of the condition.

### 38 **Further rationale for the selection of vaccines**

#### 39 *Bacillus Calmette–Guérin (BCG)*

40 BCG is a live, replicating parenteral vaccine, and the only licensed vaccine against TB. The BCG  
41 vaccine for these studies will be obtained from the Serum Institute of India either directly, or  
42 through a supplier in Uganda. The Serum Institute of India provides much of the BCG vaccine used  
43 in Uganda.

44 Worldwide, TB is among the top 10 causes of death; Uganda has an estimated incidence of  
45 202/100,000 people.<sup>3</sup> Infectious, sputum positive, pulmonary TB classically emerges in adolescence,  
46 driving the on-going epidemic.<sup>4</sup> Thus adolescent booster immunisation is a key TB control strategy.<sup>5</sup>  
47 However, BCG vaccine response and efficacy are often impaired in tropical and rural settings<sup>6-8</sup> and  
48 new TB vaccines are similarly affected.<sup>9</sup> In the past, the WHO has been hesitant to recommend BCG  
49 re-vaccination. However, in 2017 WHO’s Strategic Advisory Group of Experts (SAGE) recommended:  
50 “Further research is warranted to explore whether certain sub-groups of age, geographic or *M.*  
51 *tuberculosis* exposure categories would benefit from re-vaccination.”<sup>10</sup> Recent results suggest that,  
52 despite the variability of BCG efficacy between populations, BCG vaccination in adolescence offers  
53 benefit in some tropical settings, especially for individuals who are not yet infected with  
54 *Mycobacterium tuberculosis*, and may also be cost-effective.<sup>7,11</sup> Also, BCG vaccine is currently being  
55 used among adolescents in South Africa as a comparator in a trial of a novel TB vaccine (trial

1  
2  
3 56 registration NCT02075203). BCG efficacy in Ugandan adolescents, and differences in BCG vaccine  
4  
5 57 responses between urban and rural Ugandan populations, have not been tested. Information  
6  
7 58 obtained from this study is expected to further inform the use of BCG in adolescents, and also to  
8  
9 59 inform the development of new vaccines for tuberculosis.

#### 10 60 *Yellow fever vaccine*

11  
12 61 Yellow fever vaccine YF-17D is a live replicating parenteral vaccine. The vaccine (Stamaril; Sanofi  
13  
14 62 Pasteur) is available for purchase in Uganda. Yellow Fever (YF) causes outbreaks in Uganda and the  
15  
16 63 wider region<sup>12</sup> and YF-17D is a candidate for Uganda's expanded programme on immunisation (EPI).  
17  
18 64 Lower vaccine replication, lower neutralising antibody induction, and greater waning, are described  
19  
20 65 in Uganda compared to Switzerland.<sup>13</sup> YF-17D is a potential vector for novel vaccine constructs,<sup>14</sup>  
21  
22 66 adding relevance to vaccine development.

#### 23 67 *Typhoid vaccine Ty21a*

24  
25 68 Typhoid vaccine Ty21a is a live replicating oral vaccine and also a potential vector for new vaccine  
26  
27 69 constructs.<sup>15</sup> The Ty21a vaccine will be purchased from PaxVax, Redwood City, California.  
28  
29 70 Substantial, multi-year typhoid outbreaks occur in Uganda and immunisation campaigns have been  
30  
31 71 advocated as cost effective.<sup>16</sup> Schistosomiasis has been associated with prolonged *S. typhi* infection<sup>17</sup>  
32  
33 72 and impaired antibody responses to killed typhoid vaccines.<sup>18</sup>

34  
35 73 Ty21a was developed in the 1970s. Although not routinely used in Uganda, it has been (and is  
36  
37 74 currently) registered in many countries. It was first registered in the United States and United  
38  
39 75 Kingdom in the 1980s, and is recommended by the WHO for both endemic and epidemic settings.<sup>19</sup>  
40  
41 76 It has comparable efficacy to the parenteral Vi polysaccharide typhoid vaccine, good durability and  
42  
43 77 minimal adverse effects.<sup>19</sup> It is proposed for use in this study to model effects of study exposures  
44  
45 78 and intervention on the response to a live oral vaccine.

46  
47 79 The Ty21a vaccine is given as a three-dose regimen on alternate days.

#### 48 80 *Human Papilloma Virus (HPV) vaccine*

49  
50 81 The Human Papilloma Virus (HPV) vaccine is a protein virus-like particle. The quadrivalent HPV  
51  
52 82 Vaccine Gardasil (Merck) is available for purchase in Uganda and is the vaccine used by the national  
53  
54 83 EPI programme. Studies after three vaccine doses have found somewhat enhanced responses in the  
55  
56 84 presence of malaria, but no effect of helminths.<sup>20</sup> No study has previously investigated parasite  
57  
58 85 effects on the priming response, but recent results for tetanus suggest that priming may be more  
59  
60 86 susceptible than boosting to adverse effects.<sup>21</sup> This will be important if forthcoming trials support  
87  
88 89 single-dose HPV immunisation (NCT02834637). HPV immunisation is being rolled out among girls to

1  
2  
3 88 prevent cervical neoplasia, the most common cancer among Ugandan women and we will  
4  
5 89 coordinate provision with the national HPV immunisation programme.<sup>22</sup> HPV immunisation is also  
6  
7 90 beneficial for boys since HPV infection is associated with anogenital warts, anal cancer and  
8  
9 91 oropharyngeal cancers in both males and females, and with penile cancer in men,<sup>23</sup> and we will  
10  
11 92 include boys in these studies.

### 12 93 *Tetanus and diphtheria vaccines*

14 94 Tetanus and diphtheria (Td) vaccines comprise inert toxoids. Schistosomiasis is associated with a Th2  
15  
16 95 biased response to tetanus toxoid<sup>24</sup> and with suppressed antibody responses among those with low  
17  
18 96 pre-immunisation antibody levels.<sup>21</sup> Booster immunisation is recommended for young women to  
19  
20 97 prevent maternal and neonatal tetanus. Recent evidence emphasises the need to protect young  
21  
22 98 men also.<sup>25</sup>

### 23 99 ***Immunisation Postponement Criteria***

25 100 If any one of the following is identified at the time scheduled for immunisation, the participant may  
26  
27 101 be immunised at a later date, or withdrawn, at the discretion of the Investigator. The participant  
28  
29 102 must be followed until resolution of the event as with any adverse event:

- 31 103 • Acute disease at the time of immunisation. Acute disease is defined as the presence of a  
32  
33 104 moderate or severe illness with or without fever. All vaccines can be administered to persons  
34  
35 105 with a minor illness such as diarrhoea or mild upper respiratory infection with or without low-  
36  
37 106 grade fever, i.e. temperature of  $\leq 37.5^{\circ}\text{C}$  ( $99.5^{\circ}\text{F}$ )
- 38 107 • Temperature of  $>37.5^{\circ}\text{C}$  ( $99.5^{\circ}\text{F}$ ) at the time of immunisation
- 40 108 • Taking antibiotics or antimalarials currently, or within the past 7 days, of the date of Ty21a  
41  
42 109 administration (ascertained verbally)

### 44 110 ***Vaccine storage and transport***

46 111 In order to maintain a reliable vaccine cold chain, the vaccines and diluents to be used will be stored  
47  
48 112 and transported within the recommended temperature range of  $+2^{\circ}\text{C}$  to  $+8^{\circ}\text{C}$ . Care will be taken to  
49  
50 113 ensure that the vaccines are not frozen. BCG, being sensitive to light, will be kept in the dark  
51  
52 114 (normally within its secondary packaging) for as long as possible to protect it during storage and  
53  
54 115 transportation. All vaccines will be kept in appropriate refrigeration equipment with a temperature  
55  
56 116 monitoring device to ensure temperatures remain between  $+2^{\circ}\text{C}$  and  $+8^{\circ}\text{C}$ . Cold boxes/vaccines  
57  
58 117 carriers with temperature monitors will be used to transport vaccines and the diluents from the  
59  
60 118 MRC/UVRI and LSHTM Uganda Research Unit (Entebbe) to Koome island and while transporting  
60 119 vaccines to immunisation sessions. Designated staff will be given responsibility for managing the



1  
2  
3 120 vaccine cold chain. All cold chain equipment including the temperature monitoring devices used for  
4  
5 121 this project will comply with relevant technical specifications as defined by the EPI standards. Basic  
6  
7 122 routine maintenance will be regularly carried out on all cold chain equipment.

### 8 9 123 ***Additional laboratory measurements***

10  
11 124 Additional assays will comprise HIV serology, pregnancy testing and full blood counts. HIV testing  
12  
13 125 and pregnancy testing will be accompanied by appropriate counselling by trained staff.

- 14  
15 126 • HIV serology will be done on blood samples using rapid tests and according to prevailing  
16  
17 127 national algorithms.<sup>26</sup> This will be done at baseline.
- 18  
19 128 • Pregnancy testing will be done using urine samples and standard operating procedures for  
20  
21 129 assessment of urine  $\beta$ -human chorionic gonadotropin ( $\beta$ hCG). This will be done at baseline  
22  
23 130 and before immunisation on each immunisation day.
- 24  
25 131 • Full blood counts will be conducted using a haematology analyser. Mild, moderate and  
26  
27 132 severe anaemia will be defined according to WHO guidelines, by age.<sup>27</sup> This will be done at  
28  
29 133 baseline to test for anaemia as part of the eligibility assessment, and pre-immunisation as  
30  
31 134 part of the assessment of immunological profile.

32  
33 135 Individuals found to be HIV positive or pregnant will be referred to appropriate providers for further  
34  
35 136 care. Individuals with severe anaemia (haemoglobin <82g/L) will be excluded from the randomised  
36  
37 137 intervention (since the intervention might be beneficial in management of anaemia). They will be  
38  
39 138 treated for anaemia.

### 40 41 139 ***Sample handling and archive***

42  
43 140 Blood and other samples will be processed according to local laboratory standard operating  
44  
45 141 procedures (SOPs). All samples will reach the laboratory in anonymised form.

46  
47 142 A sample archive will be developed. Although our current programme of work will address specific  
48  
49 143 hypotheses regarding pathways of effects of parasites and interventions, the sample archive will  
50  
51 144 provide a major asset for exploration of new leads arising from this work, or for an alternative,  
52  
53 145 “systems biology” approach employing (for example) proteomic, genomic, epigenetic and  
54  
55 146 transcriptomic analyses, and investigating the microbiome and virome. Information provided to  
56  
57 147 participants, and consent forms, will include considerations of sample storage, and the possibility of  
58  
59 148 sample analysis in laboratories within and outside Uganda. Participants will be able to decide if they  
60  
61 149 will permit such future use of any leftover samples. We plan to store the samples for up to 20 years.  
62  
63 150 If further storage is needed after that time, permission will be requested from the Uganda Virus  
64  
65 151 Research Institute and London School of Hygiene and Tropical Medicine ethical review committees.

1  
2  
3 152 If they elect not to permit this, all of those leftover samples will be discarded after the completion of  
4  
5 153 the work included in the current protocol.

6  
7 154 ***Operational considerations***

8  
9 155 *Programme governance*

10  
11 156 A Programme Steering Committee has been set up to guide progress across all projects. This  
12  
13 157 comprises the following:

- 14  
15 158 • An independent chair  
16  
17 159 • Representatives from the Ministry of Health programmes for immunisation and for vector  
18  
19 160 borne disease control  
20  
21 161 • Representatives of district authorities (Mukono and Jinja districts)  
22  
23 162 • Community representatives  
24  
25 163 • Principal investigator and co-investigators  
26  
27 164 • Project leader and post-doctoral immunologist  
28  
29 165 • Trial statistician  
30  
31 166 • Laboratory manager  
32  
33 167 • Medical Research Council observer

34  
35 168 *Informed consent*

36  
37 169 Both written informed assent from the participants and written informed consent from a parent or  
38  
39 170 guardian will be required for participation, although these may not necessarily be obtained at the  
40  
41 171 same time. Information will be provided in both English and the appropriate local language. For  
42  
43 172 individuals who cannot speak the languages used, or who cannot read or write, a witness who can  
44  
45 173 read the information sheet and translate the information to the participant or parent/guardian will  
46  
47 174 be used. Two different types of age specific assent forms will be used for the group of participants  
48  
49 175 aged 9 – 12 years and for the group aged 13 – 17 years. Informed consent by emancipated or mature  
50  
51 176 minors will be obtained using a designated consent form for these categories of participants.

52  
53 177 The aims of the study, all tests, treatments and immunisations to be carried out and potential risks  
54  
55 178 will be explained. The participant will be given the opportunity to ask about details of the trial, and  
56  
57 179 will then have time to consider whether or not to participate. If they do decide to participate, they  
58  
59 180 and their parent/guardian will sign and date two copies of the assent and consent forms, one for  
60  
181 them to take away and keep, and one to be stored securely by the research team. Separate  
182  
information and consent forms will be provided (i) for consent for storage of samples for future

1  
2  
3 183 studies and for anonymous sharing of data from this study and (ii) for possible genetic studies; the  
4  
5 184 information sheet will explain that these data may be used in analyses related to this protocol.  
6

7 185 *Screening and Eligibility Assessment*  
8

9 186 Once the informed consent process has been completed, and consent (and assent) given, a baseline  
10  
11 187 medical history (including concomitant medication) will be collected. Vital signs will be checked and  
12  
13 188 a physical examination will be performed. Inclusion and exclusion criteria will be checked.

14  
15 189 Participants will undergo pre- and post-test counselling for HIV and (for girls) pregnancy testing by a  
16  
17 190 trained and experienced nurse- or clinician-counsellor. Blood, urine and stool samples will be  
18  
19 191 obtained, for tests as specified in the schedule of procedures. These tests are to exclude the major,  
20  
21 192 immunomodulating co-infection, HIV, and conditions that might impact safety (anaemia,  
22  
23 193 pregnancy).

24 194 *Enrolment*

25  
26 195 Participants who consent/assent, complete the screening processes, satisfy all the inclusion criteria  
27  
28 196 and meet none of the exclusion criteria will be enrolled.

29  
30 197 *Discontinuation/withdrawal criteria*

31  
32 198 In accordance with the principles of the current revision of the Declaration of Helsinki and any other  
33  
34 199 applicable regulations, a participant has the right to withdraw from the study at any time and for any  
35  
36 200 reason, and is not obliged to give his or her reasons for doing so. The Investigator may withdraw the  
37  
38 201 participant at any time in the interests of the participant's health and well-being. In addition, the  
39  
40 202 participant may withdraw/be withdrawn for any of the following reasons:

- 41 203
- 42 • Ineligibility (either arising during the study or retrospectively, having been overlooked at  
43 screening)
  - 44 • Administrative decision by the Investigator
  - 45 • Significant protocol deviation
  - 46 • Participant non-compliance with study requirements
  - 47 • An adverse event which requires discontinuation of the study involvement or results in  
48 inability to continue to comply with study procedures.
- 49 208  
50  
51 209

52  
53 210 Any participant who becomes pregnant during the trial will be followed up until the end of the  
54  
55 211 pregnancy but no further immunisations will be given unless indicated during pregnancy (as is the  
56  
57 212 case for tetanus toxoid). The trial allocation for this participant will be unblinded and the participant  
58  
59 213 will only be given further treatment if clinically indicated. The babies will also be followed up and  
60

1  
2  
3 214 examined for any adverse effects. We will not routinely perform venepuncture in a pregnant  
4  
5 215 participant.

6  
7 216 The reason for withdrawal will be recorded in the case report form (CRF). If withdrawal is due to an  
8  
9 217 AE, appropriate follow-up visits or medical care will be arranged, with the agreement of the  
10  
11 218 participant, until the AE has resolved, stabilised or a non-trial related causality has been assigned.

12  
13 219 If a participant withdraws from the study samples collected before their withdrawal from the trial  
14  
15 220 will be used/ stored unless the participant specifically requests otherwise.

16 221 *Trial discontinuation*

17  
18 222 The trial will be discontinued in the event of new scientific information that renders continuation  
19  
20 223 futile or unethical, or for any other reason, at the discretion of the Programme Steering Committee.

21  
22 224 *End of study definition*

23  
24 225 The trial will be completed when the last participant enrolled into the trial has completed their final  
25  
26 226 follow up visit.

27  
28 227 *Safety assessments and oversight*

29  
30 228 No new investigational drug or product will be used in the proposed trial. However, standard  
31  
32 229 approaches for monitoring safety and reporting of serious adverse events will be followed.

33  
34 230 *Monitoring*

35  
36 231 The trial will be monitored by both internal and external monitors according to a pre-defined  
37  
38 232 monitoring plan which will include a site initiation visit, monitoring visits at least annually, and a  
39  
40 233 close-out visit. The monitors will assess patient safety, data integrity, and adherence to the protocol  
41  
42 234 and to Good Clinical Research Practice procedures.

43  
44 235 ***Considerations regarding standard of care***

45  
46 236 *S. mansoni* infection status will be determined retrospectively through assays conducted in bulk on  
47  
48 237 stored samples (plasma CAA). These results will not, therefore, be useful to determine management  
49  
50 238 of individual participants.

51 239 Participants in the standard treatment arm will receive lower levels of anthelmintic treatment.

52 240 However, all trial arms will receive a minimum of well-implemented national standard of care.

53  
54 241 Standard of care will comprise annual praziquantel treatment. Our own results from the Lake

55  
56 242 Victoria Island Intervention Study on Worms and Allergy-related diseases (LaVIISWA),<sup>28</sup> which

57  
58 243 compared annual versus quarterly intervention for schistosomiasis at community level over three  
59  
60

1  
2  
3 244 years, showed no advantage of quarterly treatment for morbidity outcomes attributed to  
4  
5 245 schistosomiasis.  
6  
7 246 Schistosomiasis can cause anaemia. To manage the expected differential benefits of the  
8  
9 247 interventions for anaemia, a full blood count will be performed at baseline, as discussed above;  
10  
11 248 anaemic children will be managed appropriately and severely anaemic children excluded.  
12  
13 249 Albendazole will be provided twice a year to manage nematode infections (after collection of  
14  
15 250 primary and secondary endpoint samples).

### 16 251 ***Procedures to be followed in the event of abnormal findings***

17  
18 252 Abnormal clinical findings from medical history, examination or blood tests will be assessed as to  
19  
20 253 their clinical significance throughout the trials. If an abnormal test result is deemed clinically  
21  
22 254 significant, it may be repeated. If a test remains clinically significant, the participant will be informed  
23  
24 255 and appropriate medical care arranged as appropriate and with the permission of the participant.  
25  
26 256 Specific details regarding findings, discussion with participants and resulting actions will be recorded  
27  
28 257 in the clinical records. Decisions to exclude the participant from enrolling in the trial or to withdraw  
29  
30 258 a participant from the trial will be at the discretion of the Investigator.

### 31 259 ***Data and Safety Monitoring Board (DSMB)***

32  
33 260 A data and safety monitoring board (DSMB) has been appointed to provide real-time safety  
34  
35 261 oversight. The DSMB will be notified within 7 days of the Investigators' being aware of the  
36  
37 262 occurrence of SAEs. The DSMB may recommend the Investigators to place the trial on hold if  
38  
39 263 deemed necessary following an intervention-related SAE. The DSMB will be chaired by a clinician  
40  
41 264 experienced in clinical trials. There will be a minimum of two other appropriately qualified  
42  
43 265 committee members. In the case of events related to a blinded intervention, the DSMB can request  
44  
45 266 unblinding. Membership will include a statistician, and at least one Ugandan member. All  
46  
47 267 correspondence between Investigators and the DSMB will be conveyed by the Principal Investigator  
48  
49 268 to the trial Sponsor. The Chair of the DSMB will be contacted for advice and independent review by  
50  
51 269 the Investigator or trial Sponsor in the following situations:

- 52 270 • The occurrence of any SAE
- 53 271 • Any other situation where the Investigator or trial Sponsor feels independent advice or
- 54 272 review is important

### 55 273 ***Ethical and regulatory considerations***

56  
57  
58 274 *Further information regarding risks*  
59  
60

1  
2  
3 275 The immunisations to be given have recognised side effects which are usually mild and resolve  
4  
5 276 spontaneously in a few days to one week. Parenteral vaccines are likely to result in pain and  
6  
7 277 swelling at the site of injection and mild fever; very occasionally pain and swelling can be severe and  
8  
9 278 associated with difficulty in moving the shoulder. Sometimes headache and tiredness occur. Rarely  
10  
11 279 a vaccine may cause a severe allergic reaction. For most vaccines this is estimated at less than one  
12  
13 280 in a million doses (but 1 in 55,000 for Yellow Fever vaccine).<sup>29</sup> Individuals with a history of a  
14  
15 281 possible allergic reaction to drugs or vaccines, or to vaccine components including eggs or chicken  
16  
17 282 proteins, will be excluded from the studies. The research team will be trained and prepared to  
18  
19 283 manage severe allergic reactions.

20  
21 284 Adverse reactions to Yellow Fever vaccine include severe nervous system reaction (about 1 person in  
22  
23 285 125,000) and severe, life-threatening illness with organ failure (about 1 person in 250,000). The  
24  
25 286 mortality for this severe, life-threatening adverse effect is reported as about 50%.<sup>29</sup>

26  
27 287 BCG immunisation is likely to induce a scar in many cases. This may develop over several weeks,  
28  
29 288 starting as a small papule at the injection site which may become ulcerated and then heal over a  
30  
31 289 period of 2 to 5 months; and lymphadenopathy may develop. Occasionally a more severe local  
32  
33 290 reaction occurs (estimated at 1 per 1,000-10,000 doses): for example, an abscess develops and scars  
34  
35 291 may develop into keloids. Rarely BCG can cause disseminated disease (1 per 230,000 to 640,000  
36  
37 292 doses), or disease in sites remote from the immunisation site. Disseminated BCG disease usually  
38  
39 293 occurs in immunocompromised people: HIV positive people will be excluded from these studies.<sup>30</sup>  
40  
41 294 BCG "pre-immunisation" may interfere with the response to the subsequent live vaccines; indeed  
42  
43 295 our hypothesis, and published results, suggest that it may suppress replication of YF 17D vaccine.<sup>31</sup>  
44  
45 296 However, this reduced replication has not been shown to correlate with, or result in, reduced levels  
46  
47 297 of neutralising antibody titres (which are the desired protective outcome).<sup>13 31</sup>

48  
49 298 Oral typhoid vaccine (Ty21a) may occasionally be associated with stomach pain, nausea, vomiting  
50  
51 299 and (rarely) rash.<sup>29</sup>

52  
53 300 Praziquantel has been in use for about 30 years. It has a well-recognised profile of side effects  
54  
55 301 including dizziness, nausea, vomiting, abdominal pain, diarrhoea (sometimes with blood) and  
56  
57 302 urticarial rash. The symptoms are considered to arise largely from the effects of killing worms and to  
58  
59 303 be more severe in people with heavy infections. Symptoms are better tolerated when the drugs are  
60  
304 given after food and we will provide treatment after a meal or snack. Simple medications, such as  
305 paracetamol and cetirizine, can alleviate symptoms and these will be available on treatment days.

306 **References**

- 1  
2  
3  
4  
5  
6 307 1. Wajja A, Kizito D, Nassanga B, et al. The effect of current *Schistosoma mansoni* infection on the  
7 308 immunogenicity of a candidate TB vaccine, MVA85A, in BCG-vaccinated adolescents: An open-label trial.  
8 309 *PLoS neglected tropical diseases* 2017;11(5):e0005440. doi: 10.1371/journal.pntd.0005440 [published Online  
9 310 First: 2017/05/05]
- 10  
11 311 2. WHO. Growth reference 5-19 years. 2007
- 12  
13 312 3. WHO. Global tuberculosis report 2016 [http://www.who.int/tb/publications/global\\_report/en/](http://www.who.int/tb/publications/global_report/en/) (accessed 17  
14 313 June 2017), 2016.
- 15  
16 314 4. Alcais A, Fieschi C, Abel L, et al. Tuberculosis in children and adults: two distinct genetic diseases. *J Exp Med*  
17 315 2005;202(12):1617-21. doi: 10.1084/jem.20052302
- 18  
19 316 5. Weiner J, 3rd, Kaufmann SH. Recent advances towards tuberculosis control: vaccines and biomarkers. *J*  
20 317 *Intern Med* 2014;275(5):467-80. doi: 10.1111/joim.12212
- 21  
22 318 6. Fine PE. Variation in protection by BCG: implications of and for heterologous immunity. *Lancet (London,*  
23 319 *England)* 1995;346(8986):1339-45.
- 24  
25 320 7. Barreto ML, Pilger D, Pereira SM, et al. Causes of variation in BCG vaccine efficacy: examining evidence from  
26 321 the BCG REVAC cluster randomized trial to explore the masking and the blocking hypotheses. *Vaccine*  
27 322 2014;32(30):3759-64. doi: 10.1016/j.vaccine.2014.05.042
- 28  
29 323 8. Black GF, Weir RE, Floyd S, et al. BCG-induced increase in interferon-gamma response to mycobacterial  
30 324 antigens and efficacy of BCG vaccination in Malawi and the UK: two randomised controlled studies. *Lancet*  
31 325 *(London, England)* 2002;359(9315):1393-401. doi: 10.1016/S0140-6736(02)08353-8
- 32  
33 326 9. Tanner R, Kakalacheva K, Miller E, et al. Serum indoleamine 2,3-dioxygenase activity is associated with  
34 327 reduced immunogenicity following vaccination with MVA85A. *BMC infectious diseases* 2014;14:660. doi:  
35 328 10.1186/s12879-014-0660-7 [published Online First: 2014/12/04]
- 36  
37 329 10. WHO. SAGE Evidence to recommendations framework. 2017.  
38 330 [http://www.who.int/immunization/sage/meetings/2017/october/2](http://www.who.int/immunization/sage/meetings/2017/october/2_EvidencetoRecommendationFramework_BCG.pdf) [EvidencetoRecommendationFramework](http://www.who.int/immunization/sage/meetings/2017/october/2_EvidencetoRecommendationFramework_BCG.pdf)  
39 331 [\\_BCG.pdf](http://www.who.int/immunization/sage/meetings/2017/october/2_EvidencetoRecommendationFramework_BCG.pdf) (accessed 16th March 2018).
- 40  
41 332 11. Dye C. Making wider use of the world's most widely used vaccine: Bacille Calmette-Guerin revaccination  
42 333 reconsidered. *Journal of the Royal Society, Interface* 2013;10(87):20130365. doi: 10.1098/rsif.2013.0365  
43 334 [published Online First: 2013/08/02]
- 44  
45 335 12. Kraemer MU, Faria NR, Reiner RC, Jr., et al. Spread of yellow fever virus outbreak in Angola and the  
46 336 Democratic Republic of the Congo 2015-16: a modelling study. *The Lancet Infectious diseases* 2016 doi:  
47 337 10.1016/s1473-3099(16)30513-8 [published Online First: 2016/12/27]
- 48  
49 338 13. Muyanja E, Ssemaganda A, Ngauv P, et al. Immune activation alters cellular and humoral responses to  
50 339 yellow fever 17D vaccine. *The Journal of clinical investigation* 2014;124(7):3147-58. doi: 10.1172/jci75429  
51 340 [published Online First: 2014/06/10]
- 52  
53 341 14. Aguiar M, Stollenwerk N, Halstead SB. The Impact of the Newly Licensed Dengue Vaccine in Endemic  
54 342 Countries. *PLoS neglected tropical diseases* 2016;10(12):e0005179. doi: 10.1371/journal.pntd.0005179  
55 343 [published Online First: 2016/12/22]
- 56  
57 344 15. Dharmasena MN, Osorio M, Filipova S, et al. Stable expression of *Shigella dysenteriae* serotype 1 O-antigen  
58 345 genes integrated into the chromosome of live *Salmonella* oral vaccine vector Ty21a. *Pathogens and disease*  
59 346 2016 doi: 10.1093/femspd/ftw098 [published Online First: 2016/09/23]



- 1  
2  
3 347 16. Carias C, Walters MS, Wefula E, et al. Economic evaluation of typhoid vaccination in a prolonged typhoid  
4 348 outbreak setting: the case of Kasese district in Uganda. *Vaccine* 2015;33(17):2079-85. doi:  
5 349 10.1016/j.vaccine.2015.02.027 [published Online First: 2015/02/26]  
6  
7 350 17. Melhem RF, LoVerde PT. Mechanism of interaction of Salmonella and Schistosoma species. *Infection and*  
8 351 *immunity* 1984;44(2):274-81. [published Online First: 1984/05/01]  
9  
10 352 18. Muniz-Junqueira MI, Tavares-Neto J, Prata A, et al. Antibody response to Salmonella typhi in human  
11 353 schistosomiasis mansoni. *Revista da Sociedade Brasileira de Medicina Tropical* 1996;29(5):441-5. [published  
12 354 Online First: 1996/09/01]  
13  
14 355 19. WHO. Position Paper on Typhoid vaccines: WHO position paper – March 2018 2018  
15  
16 356 20. Brown J, Baisley K, Kavishe B, et al. Impact of malaria and helminth infections on immunogenicity of the  
17 357 human papillomavirus-16/18 AS04-adjuvanted vaccine in Tanzania. *Vaccine* 2014;32(5):611-7. doi:  
18 358 10.1016/j.vaccine.2013.11.061  
19  
20 359 21. Riner DK, Ndombi EM, Carter JM, et al. Schistosoma mansoni Infection Can Jeopardize the Duration of  
21 360 Protective Levels of Antibody Responses to Immunizations against Hepatitis B and Tetanus Toxoid. *PLoS*  
22 361 *neglected tropical diseases* 2016;10(12):e0005180. doi: 10.1371/journal.pntd.0005180  
23  
24 362 22. Centre HI. HPV and related diseases report: Uganda. 2016.  
25 363 <http://www.hpvcnre.net/statistics/reports/UGA.pdf> (accessed 20.01.2017).  
26  
27 364 23. WHO. Human papillomavirus vaccines: WHO position paper, May 2017. *Releve epidemiologique*  
28 365 *hebdomadaire* 2017;92(19):241-68. [published Online First: 2017/05/23]  
29  
30 366 24. Sabin EA, Araujo MI, Carvalho EM, et al. Impairment of tetanus toxoid-specific Th1-like immune responses  
31 367 in humans infected with Schistosoma mansoni. *The Journal of infectious diseases* 1996;173(1):269-72.  
32 368 [published Online First: 1996/01/01]  
33  
34 369 25. Nanteza B, Galukande M, Aceng J, et al. The burden of tetanus in Uganda. *SpringerPlus* 2016;5(1):705. doi:  
35 370 10.1186/s40064-016-2309-z [published Online First: 2016/06/29]  
36  
37 371 26. Ministry of Health–Uganda. Uganda Clinical Guidelines 2016.  
38 372 <http://apps.who.int/medicinedocs/documents/s23532en/s23532en.pdf>  
39  
40 373 27. WHO. Haemoglobin concentrations for the diagnosis of anaemia and assessment of severity. Vitamin and  
41 374 Mineral Nutrition Information System. Geneva, World Health Organization, 2011  
42 375 (WHO/NMH/NHD/MNM/11.1).  
43  
44 376 28. Sanya RE, Nkurunungi G, Hoek Spaans R, et al. The Impact of Intensive Versus Standard Anthelmintic  
45 377 Treatment on Allergy-related Outcomes, Helminth Infection Intensity, and Helminth-related Morbidity in  
46 378 Lake Victoria Fishing Communities, Uganda: Results From the LaVIISWA Cluster-randomized Trial. *Clinical*  
47 379 *Infectious Diseases* 2018:ciy761-ci61. doi: 10.1093/cid/ciy761  
48  
49 380 29. CDC. Centers for Disease Control and Prevention, vaccines and immunizations.  
50  
51 381 30. WHO. Information sheet observed rate of vaccine reactions Bacille Calmette-Guérin (BCG) vaccine. 2012  
52  
53 382 31. Arts RJW, Moorlag S, Novakovic B, et al. BCG Vaccination Protects against Experimental Viral Infection in  
54 383 Humans through the Induction of Cytokines Associated with Trained Immunity. *Cell host & microbe*  
55 384 2018;23(1):89-100.e5. doi: 10.1016/j.chom.2017.12.010 [published Online First: 2018/01/13]  
56 385  
57  
58  
59  
60



# Reporting checklist for protocol of a clinical trial.

Based on the SPIRIT guidelines.

## Instructions to authors

Complete this checklist by entering the page numbers from your manuscript where readers will find each of the items listed below.

Your article may not currently address all the items on the checklist. Please modify your text to include the missing information. If you are certain that an item does not apply, please write "n/a" and provide a short explanation.

Upload your completed checklist as an extra file when you submit to a journal.

In your methods section, say that you used the SPIRIT reporting guidelines, and cite them as:

Chan A-W, Tetzlaff JM, Altman DG, Laupacis A, Gøtzsche PC, Krleža-Jerić K, Hróbjartsson A, Mann H, Dickersin K, Berlin J, Doré C, Parulekar W, Summerskill W, Groves T, Schulz K, Sox H, Rockhold FW, Rennie D, Moher D. SPIRIT 2013 Statement: Defining standard protocol items for clinical trials. *Ann Intern Med.* 2013;158(3):200-207

|                                   | Reporting Item                                                                                                                  | Page Number                                |
|-----------------------------------|---------------------------------------------------------------------------------------------------------------------------------|--------------------------------------------|
| <b>Administrative information</b> |                                                                                                                                 |                                            |
| Title                             | <a href="#">#1</a> Descriptive title identifying the study design, population, interventions, and, if applicable, trial acronym | 1                                          |
| Trial registration                | <a href="#">#2a</a> Trial identifier and registry name. If not yet registered, name of intended registry                        | 2                                          |
| Trial registration: data set      | <a href="#">#2b</a> All items from the World Health Organization Trial Registration Data Set                                    | n/a                                        |
| Protocol version                  | <a href="#">#3</a> Date and version identifier                                                                                  | Information available at<br>ISRCTN60517191 |
| Funding                           | <a href="#">#4</a> Sources and types of financial, material, and other support                                                  | 15                                         |
| Roles and                         | <a href="#">#5a</a> Names, affiliations, and roles of protocol                                                                  | 15                                         |

|                                                                       |                     |                                                                                                                                                                                                                                                                                          |                                                              |
|-----------------------------------------------------------------------|---------------------|------------------------------------------------------------------------------------------------------------------------------------------------------------------------------------------------------------------------------------------------------------------------------------------|--------------------------------------------------------------|
| responsibilities:<br>contributorship                                  |                     | contributors                                                                                                                                                                                                                                                                             |                                                              |
| Roles and responsibilities:<br>sponsor contact information            | <a href="#">#5b</a> | Name and contact information for the trial sponsor                                                                                                                                                                                                                                       | Information available at<br>ISRCTN60517191                   |
| Roles and responsibilities:<br>sponsor and funder                     | <a href="#">#5c</a> | Role of study sponsor and funders, if any, in study design; collection, management, analysis, and interpretation of data; writing of the report; and the decision to submit the report for publication, including whether they will have ultimate authority over any of these activities | 16                                                           |
| Roles and responsibilities:<br>committees                             | <a href="#">#5d</a> | Composition, roles, and responsibilities of the coordinating centre, steering committee, endpoint adjudication committee, data management team, and other individuals or groups overseeing the trial, if applicable (see Item 21a for data monitoring committee)                         | Information detailed in<br>supplementary<br>information file |
| <b>Introduction</b>                                                   |                     |                                                                                                                                                                                                                                                                                          |                                                              |
| Background and rationale                                              | <a href="#">#6a</a> | Description of research question and justification for undertaking the trial, including summary of relevant studies (published and unpublished) examining benefits and harms for each intervention                                                                                       | 4                                                            |
| Background and rationale: choice of comparators                       | <a href="#">#6b</a> | Explanation for choice of comparators                                                                                                                                                                                                                                                    | 8                                                            |
| Objectives                                                            | <a href="#">#7</a>  | Specific objectives or hypotheses                                                                                                                                                                                                                                                        | 6                                                            |
| Trial design                                                          | <a href="#">#8</a>  | Description of trial design including type of trial (eg, parallel group, crossover, factorial, single group), allocation ratio, and framework (eg, superiority, equivalence, non-inferiority, exploratory)                                                                               | 7                                                            |
| <b>Methods:<br/>Participants,<br/>interventions, and<br/>outcomes</b> |                     |                                                                                                                                                                                                                                                                                          |                                                              |

|    |                      |                      |                                                                                                                                                                                                                                                                                                                                                                                |                                                           |
|----|----------------------|----------------------|--------------------------------------------------------------------------------------------------------------------------------------------------------------------------------------------------------------------------------------------------------------------------------------------------------------------------------------------------------------------------------|-----------------------------------------------------------|
| 1  | Study setting        | <a href="#">#9</a>   | Description of study settings (eg, community clinic, academic hospital) and list of countries where data will be collected. Reference to where list of study sites can be obtained                                                                                                                                                                                             | 7                                                         |
| 2  |                      |                      |                                                                                                                                                                                                                                                                                                                                                                                |                                                           |
| 3  |                      |                      |                                                                                                                                                                                                                                                                                                                                                                                |                                                           |
| 4  |                      |                      |                                                                                                                                                                                                                                                                                                                                                                                |                                                           |
| 5  |                      |                      |                                                                                                                                                                                                                                                                                                                                                                                |                                                           |
| 6  |                      |                      |                                                                                                                                                                                                                                                                                                                                                                                |                                                           |
| 7  |                      |                      |                                                                                                                                                                                                                                                                                                                                                                                |                                                           |
| 8  | Eligibility criteria | <a href="#">#10</a>  | Inclusion and exclusion criteria for participants. If applicable, eligibility criteria for study centres and individuals who will perform the interventions (eg, surgeons, psychotherapists)                                                                                                                                                                                   | 7                                                         |
| 9  |                      |                      |                                                                                                                                                                                                                                                                                                                                                                                |                                                           |
| 10 |                      |                      |                                                                                                                                                                                                                                                                                                                                                                                |                                                           |
| 11 |                      |                      |                                                                                                                                                                                                                                                                                                                                                                                |                                                           |
| 12 |                      |                      |                                                                                                                                                                                                                                                                                                                                                                                |                                                           |
| 13 |                      |                      |                                                                                                                                                                                                                                                                                                                                                                                |                                                           |
| 14 | Interventions:       | <a href="#">#11a</a> | Interventions for each group with sufficient detail to allow replication, including how and when they will be administered                                                                                                                                                                                                                                                     | 8                                                         |
| 15 | description          |                      |                                                                                                                                                                                                                                                                                                                                                                                |                                                           |
| 16 |                      |                      |                                                                                                                                                                                                                                                                                                                                                                                |                                                           |
| 17 |                      |                      |                                                                                                                                                                                                                                                                                                                                                                                |                                                           |
| 18 |                      |                      |                                                                                                                                                                                                                                                                                                                                                                                |                                                           |
| 19 |                      |                      |                                                                                                                                                                                                                                                                                                                                                                                |                                                           |
| 20 | Interventions:       | <a href="#">#11b</a> | Criteria for discontinuing or modifying allocated interventions for a given trial participant (eg, drug dose change in response to harms, participant request, or improving / worsening disease)                                                                                                                                                                               | Detailed in supplementary information file                |
| 21 | modifications        |                      |                                                                                                                                                                                                                                                                                                                                                                                |                                                           |
| 22 |                      |                      |                                                                                                                                                                                                                                                                                                                                                                                |                                                           |
| 23 |                      |                      |                                                                                                                                                                                                                                                                                                                                                                                |                                                           |
| 24 |                      |                      |                                                                                                                                                                                                                                                                                                                                                                                |                                                           |
| 25 |                      |                      |                                                                                                                                                                                                                                                                                                                                                                                |                                                           |
| 26 |                      |                      |                                                                                                                                                                                                                                                                                                                                                                                |                                                           |
| 27 | Interventions:       | <a href="#">#11c</a> | Strategies to improve adherence to intervention protocols, and any procedures for monitoring adherence (eg, drug tablet return; laboratory tests)                                                                                                                                                                                                                              | Detailed in supplementary information file                |
| 28 | adherence            |                      |                                                                                                                                                                                                                                                                                                                                                                                |                                                           |
| 29 |                      |                      |                                                                                                                                                                                                                                                                                                                                                                                |                                                           |
| 30 |                      |                      |                                                                                                                                                                                                                                                                                                                                                                                |                                                           |
| 31 |                      |                      |                                                                                                                                                                                                                                                                                                                                                                                |                                                           |
| 32 | Interventions:       | <a href="#">#11d</a> | Relevant concomitant care and interventions that are permitted or prohibited during the trial                                                                                                                                                                                                                                                                                  | Detailed in supplementary information file                |
| 33 | concomitant care     |                      |                                                                                                                                                                                                                                                                                                                                                                                |                                                           |
| 34 |                      |                      |                                                                                                                                                                                                                                                                                                                                                                                |                                                           |
| 35 |                      |                      |                                                                                                                                                                                                                                                                                                                                                                                |                                                           |
| 36 |                      |                      |                                                                                                                                                                                                                                                                                                                                                                                |                                                           |
| 37 | Outcomes             | <a href="#">#12</a>  | Primary, secondary, and other outcomes, including the specific measurement variable (eg, systolic blood pressure), analysis metric (eg, change from baseline, final value, time to event), method of aggregation (eg, median, proportion), and time point for each outcome. Explanation of the clinical relevance of chosen efficacy and harm outcomes is strongly recommended | 10                                                        |
| 38 |                      |                      |                                                                                                                                                                                                                                                                                                                                                                                |                                                           |
| 39 |                      |                      |                                                                                                                                                                                                                                                                                                                                                                                |                                                           |
| 40 |                      |                      |                                                                                                                                                                                                                                                                                                                                                                                |                                                           |
| 41 |                      |                      |                                                                                                                                                                                                                                                                                                                                                                                |                                                           |
| 42 |                      |                      |                                                                                                                                                                                                                                                                                                                                                                                |                                                           |
| 43 |                      |                      |                                                                                                                                                                                                                                                                                                                                                                                |                                                           |
| 44 |                      |                      |                                                                                                                                                                                                                                                                                                                                                                                |                                                           |
| 45 |                      |                      |                                                                                                                                                                                                                                                                                                                                                                                |                                                           |
| 46 |                      |                      |                                                                                                                                                                                                                                                                                                                                                                                |                                                           |
| 47 |                      |                      |                                                                                                                                                                                                                                                                                                                                                                                |                                                           |
| 48 |                      |                      |                                                                                                                                                                                                                                                                                                                                                                                |                                                           |
| 49 |                      |                      |                                                                                                                                                                                                                                                                                                                                                                                |                                                           |
| 50 | Participant timeline | <a href="#">#13</a>  | Time schedule of enrolment, interventions (including any run-ins and washouts), assessments, and visits for participants. A schematic diagram is highly recommended (see Figure)                                                                                                                                                                                               | 14                                                        |
| 51 |                      |                      |                                                                                                                                                                                                                                                                                                                                                                                |                                                           |
| 52 |                      |                      |                                                                                                                                                                                                                                                                                                                                                                                |                                                           |
| 53 |                      |                      |                                                                                                                                                                                                                                                                                                                                                                                | Also detailed in supplementary information file, Table S1 |
| 54 |                      |                      |                                                                                                                                                                                                                                                                                                                                                                                |                                                           |
| 55 |                      |                      |                                                                                                                                                                                                                                                                                                                                                                                |                                                           |
| 56 |                      |                      |                                                                                                                                                                                                                                                                                                                                                                                |                                                           |
| 57 |                      |                      |                                                                                                                                                                                                                                                                                                                                                                                |                                                           |
| 58 |                      |                      |                                                                                                                                                                                                                                                                                                                                                                                |                                                           |
| 59 |                      |                      |                                                                                                                                                                                                                                                                                                                                                                                |                                                           |
| 60 |                      |                      |                                                                                                                                                                                                                                                                                                                                                                                |                                                           |

|    |                           |                      |                                                          |                  |
|----|---------------------------|----------------------|----------------------------------------------------------|------------------|
| 1  | Sample size               | <a href="#">#14</a>  | Estimated number of participants needed to achieve       | 11               |
| 2  |                           |                      | study objectives and how it was determined,              |                  |
| 3  |                           |                      | including clinical and statistical assumptions           |                  |
| 4  |                           |                      | supporting any sample size calculations                  |                  |
| 5  |                           |                      |                                                          |                  |
| 6  |                           |                      |                                                          |                  |
| 7  |                           |                      |                                                          |                  |
| 8  | Recruitment               | <a href="#">#15</a>  | Strategies for achieving adequate participant            | Detailed in      |
| 9  |                           |                      | enrolment to reach target sample size                    | supplementary    |
| 10 |                           |                      |                                                          | information file |
| 11 |                           |                      |                                                          |                  |
| 12 |                           |                      |                                                          |                  |
| 13 | <b>Methods:</b>           |                      |                                                          |                  |
| 14 | <b>Assignment of</b>      |                      |                                                          |                  |
| 15 | <b>interventions (for</b> |                      |                                                          |                  |
| 16 | <b>controlled trials)</b> |                      |                                                          |                  |
| 17 |                           |                      |                                                          |                  |
| 18 |                           |                      |                                                          |                  |
| 19 |                           |                      |                                                          |                  |
| 20 | Allocation: sequence      | <a href="#">#16a</a> | Method of generating the allocation sequence (eg,        | 8                |
| 21 | generation                |                      | computer-generated random numbers), and list of          |                  |
| 22 |                           |                      | any factors for stratification. To reduce predictability |                  |
| 23 |                           |                      | of a random sequence, details of any planned             |                  |
| 24 |                           |                      | restriction (eg, blocking) should be provided in a       |                  |
| 25 |                           |                      | separate document that is unavailable to those who       |                  |
| 26 |                           |                      | enrol participants or assign interventions               |                  |
| 27 |                           |                      |                                                          |                  |
| 28 |                           |                      |                                                          |                  |
| 29 |                           |                      |                                                          |                  |
| 30 |                           |                      |                                                          |                  |
| 31 | Allocation                | <a href="#">#16b</a> | Mechanism of implementing the allocation sequence        | 9                |
| 32 | concealment               |                      | (eg, central telephone; sequentially numbered,           |                  |
| 33 | mechanism                 |                      | opaque, sealed envelopes), describing any steps to       |                  |
| 34 |                           |                      | conceal the sequence until interventions are assigned    |                  |
| 35 |                           |                      |                                                          |                  |
| 36 |                           |                      |                                                          |                  |
| 37 |                           |                      |                                                          |                  |
| 38 | Allocation:               | <a href="#">#16c</a> | Who will generate the allocation sequence, who will      | 8, 9             |
| 39 | implementation            |                      | enrol participants, and who will assign participants to  |                  |
| 40 |                           |                      | interventions                                            |                  |
| 41 |                           |                      |                                                          |                  |
| 42 |                           |                      |                                                          |                  |
| 43 | Blinding (masking)        | <a href="#">#17a</a> | Who will be blinded after assignment to                  | 9                |
| 44 |                           |                      | interventions (eg, trial participants, care providers,   |                  |
| 45 |                           |                      | outcome assessors, data analysts), and how               |                  |
| 46 |                           |                      |                                                          |                  |
| 47 |                           |                      |                                                          |                  |
| 48 |                           |                      |                                                          |                  |
| 49 | Blinding (masking):       | <a href="#">#17b</a> | If blinded, circumstances under which unblinding is      | Detailed in      |
| 50 | emergency                 |                      | permissible, and procedure for revealing a               | supplementary    |
| 51 | unblinding                |                      | participant's allocated intervention during the trial    | information file |
| 52 |                           |                      |                                                          |                  |
| 53 |                           |                      |                                                          |                  |

**Methods: Data  
collection,  
management, and  
analysis**

|    |                                                  |                      |                                                                                                                                                                                                                                                                                                                                                                                                              |                                                                                                  |
|----|--------------------------------------------------|----------------------|--------------------------------------------------------------------------------------------------------------------------------------------------------------------------------------------------------------------------------------------------------------------------------------------------------------------------------------------------------------------------------------------------------------|--------------------------------------------------------------------------------------------------|
| 1  | Data collection plan                             | <a href="#">#18a</a> | Plans for assessment and collection of outcome, baseline, and other trial data, including any related processes to promote data quality (eg, duplicate measurements, training of assessors) and a description of study instruments (eg, questionnaires, laboratory tests) along with their reliability and validity, if known. Reference to where data collection forms can be found, if not in the protocol | 10.<br>More details in supplementary information file                                            |
| 2  |                                                  |                      |                                                                                                                                                                                                                                                                                                                                                                                                              |                                                                                                  |
| 3  |                                                  |                      |                                                                                                                                                                                                                                                                                                                                                                                                              |                                                                                                  |
| 4  |                                                  |                      |                                                                                                                                                                                                                                                                                                                                                                                                              |                                                                                                  |
| 5  |                                                  |                      |                                                                                                                                                                                                                                                                                                                                                                                                              |                                                                                                  |
| 6  |                                                  |                      |                                                                                                                                                                                                                                                                                                                                                                                                              |                                                                                                  |
| 7  |                                                  |                      |                                                                                                                                                                                                                                                                                                                                                                                                              |                                                                                                  |
| 8  |                                                  |                      |                                                                                                                                                                                                                                                                                                                                                                                                              |                                                                                                  |
| 9  |                                                  |                      |                                                                                                                                                                                                                                                                                                                                                                                                              |                                                                                                  |
| 10 |                                                  |                      |                                                                                                                                                                                                                                                                                                                                                                                                              |                                                                                                  |
| 11 |                                                  |                      |                                                                                                                                                                                                                                                                                                                                                                                                              |                                                                                                  |
| 12 |                                                  |                      |                                                                                                                                                                                                                                                                                                                                                                                                              |                                                                                                  |
| 13 |                                                  |                      |                                                                                                                                                                                                                                                                                                                                                                                                              |                                                                                                  |
| 14 | Data collection plan: retention                  | <a href="#">#18b</a> | Plans to promote participant retention and complete follow-up, including list of any outcome data to be collected for participants who discontinue or deviate from intervention protocols                                                                                                                                                                                                                    | Detailed in supplementary information file                                                       |
| 15 |                                                  |                      |                                                                                                                                                                                                                                                                                                                                                                                                              |                                                                                                  |
| 16 |                                                  |                      |                                                                                                                                                                                                                                                                                                                                                                                                              |                                                                                                  |
| 17 |                                                  |                      |                                                                                                                                                                                                                                                                                                                                                                                                              |                                                                                                  |
| 18 |                                                  |                      |                                                                                                                                                                                                                                                                                                                                                                                                              |                                                                                                  |
| 19 |                                                  |                      |                                                                                                                                                                                                                                                                                                                                                                                                              |                                                                                                  |
| 20 |                                                  |                      |                                                                                                                                                                                                                                                                                                                                                                                                              |                                                                                                  |
| 21 | Data management                                  | <a href="#">#19</a>  | Plans for data entry, coding, security, and storage, including any related processes to promote data quality (eg, double data entry; range checks for data values). Reference to where details of data management procedures can be found, if not in the protocol                                                                                                                                            | 13.<br>More information in the statistical analysis plan found at <a href="#">ISRCTN60517191</a> |
| 22 |                                                  |                      |                                                                                                                                                                                                                                                                                                                                                                                                              |                                                                                                  |
| 23 |                                                  |                      |                                                                                                                                                                                                                                                                                                                                                                                                              |                                                                                                  |
| 24 |                                                  |                      |                                                                                                                                                                                                                                                                                                                                                                                                              |                                                                                                  |
| 25 |                                                  |                      |                                                                                                                                                                                                                                                                                                                                                                                                              |                                                                                                  |
| 26 |                                                  |                      |                                                                                                                                                                                                                                                                                                                                                                                                              |                                                                                                  |
| 27 |                                                  |                      |                                                                                                                                                                                                                                                                                                                                                                                                              |                                                                                                  |
| 28 |                                                  |                      |                                                                                                                                                                                                                                                                                                                                                                                                              |                                                                                                  |
| 29 |                                                  |                      |                                                                                                                                                                                                                                                                                                                                                                                                              |                                                                                                  |
| 30 |                                                  |                      |                                                                                                                                                                                                                                                                                                                                                                                                              |                                                                                                  |
| 31 | Statistics: outcomes                             | <a href="#">#20a</a> | Statistical methods for analysing primary and secondary outcomes. Reference to where other details of the statistical analysis plan can be found, if not in the protocol                                                                                                                                                                                                                                     | 13.<br>More information in the statistical analysis plan found at <a href="#">ISRCTN60517191</a> |
| 32 |                                                  |                      |                                                                                                                                                                                                                                                                                                                                                                                                              |                                                                                                  |
| 33 |                                                  |                      |                                                                                                                                                                                                                                                                                                                                                                                                              |                                                                                                  |
| 34 |                                                  |                      |                                                                                                                                                                                                                                                                                                                                                                                                              |                                                                                                  |
| 35 |                                                  |                      |                                                                                                                                                                                                                                                                                                                                                                                                              |                                                                                                  |
| 36 |                                                  |                      |                                                                                                                                                                                                                                                                                                                                                                                                              |                                                                                                  |
| 37 |                                                  |                      |                                                                                                                                                                                                                                                                                                                                                                                                              |                                                                                                  |
| 38 |                                                  |                      |                                                                                                                                                                                                                                                                                                                                                                                                              |                                                                                                  |
| 39 |                                                  |                      |                                                                                                                                                                                                                                                                                                                                                                                                              |                                                                                                  |
| 40 | Statistics: additional analyses                  | <a href="#">#20b</a> | Methods for any additional analyses (eg, subgroup and adjusted analyses)                                                                                                                                                                                                                                                                                                                                     | 11.<br>More information in the statistical analysis plan found at <a href="#">ISRCTN60517191</a> |
| 41 |                                                  |                      |                                                                                                                                                                                                                                                                                                                                                                                                              |                                                                                                  |
| 42 |                                                  |                      |                                                                                                                                                                                                                                                                                                                                                                                                              |                                                                                                  |
| 43 |                                                  |                      |                                                                                                                                                                                                                                                                                                                                                                                                              |                                                                                                  |
| 44 |                                                  |                      |                                                                                                                                                                                                                                                                                                                                                                                                              |                                                                                                  |
| 45 |                                                  |                      |                                                                                                                                                                                                                                                                                                                                                                                                              |                                                                                                  |
| 46 |                                                  |                      |                                                                                                                                                                                                                                                                                                                                                                                                              |                                                                                                  |
| 47 |                                                  |                      |                                                                                                                                                                                                                                                                                                                                                                                                              |                                                                                                  |
| 48 |                                                  |                      |                                                                                                                                                                                                                                                                                                                                                                                                              |                                                                                                  |
| 49 | Statistics: analysis population and missing data | <a href="#">#20c</a> | Definition of analysis population relating to protocol non-adherence (eg, as randomised analysis), and any statistical methods to handle missing data (eg, multiple imputation)                                                                                                                                                                                                                              | Information in the statistical analysis plan found at <a href="#">ISRCTN60517191</a>             |
| 50 |                                                  |                      |                                                                                                                                                                                                                                                                                                                                                                                                              |                                                                                                  |
| 51 |                                                  |                      |                                                                                                                                                                                                                                                                                                                                                                                                              |                                                                                                  |
| 52 |                                                  |                      |                                                                                                                                                                                                                                                                                                                                                                                                              |                                                                                                  |
| 53 |                                                  |                      |                                                                                                                                                                                                                                                                                                                                                                                                              |                                                                                                  |
| 54 |                                                  |                      |                                                                                                                                                                                                                                                                                                                                                                                                              |                                                                                                  |

## Methods: Monitoring

|    |                      |                      |                                                          |                  |
|----|----------------------|----------------------|----------------------------------------------------------|------------------|
| 1  | Data monitoring:     | <a href="#">#21a</a> | Composition of data monitoring committee (DMC);          | Detailed in      |
| 2  | formal committee     |                      | summary of its role and reporting structure;             | supplementary    |
| 3  |                      |                      | statement of whether it is independent from the          | information file |
| 4  |                      |                      | sponsor and competing interests; and reference to        |                  |
| 5  |                      |                      | where further details about its charter can be found,    |                  |
| 6  |                      |                      | if not in the protocol. Alternatively, an explanation of |                  |
| 7  |                      |                      | why a DMC is not needed                                  |                  |
| 8  |                      |                      |                                                          |                  |
| 9  |                      |                      |                                                          |                  |
| 10 |                      |                      |                                                          |                  |
| 11 |                      |                      |                                                          |                  |
| 12 | Data monitoring:     | <a href="#">#21b</a> | Description of any interim analyses and stopping         | Detailed in      |
| 13 | interim analysis     |                      | guidelines, including who will have access to these      | supplementary    |
| 14 |                      |                      | interim results and make the final decision to           | information file |
| 15 |                      |                      | terminate the trial                                      |                  |
| 16 |                      |                      |                                                          |                  |
| 17 |                      |                      |                                                          |                  |
| 18 |                      |                      |                                                          |                  |
| 19 | Harms                | <a href="#">#22</a>  | Plans for collecting, assessing, reporting, and          | Detailed in      |
| 20 |                      |                      | managing solicited and spontaneously reported            | supplementary    |
| 21 |                      |                      | adverse events and other unintended effects of trial     | information file |
| 22 |                      |                      | interventions or trial conduct                           |                  |
| 23 |                      |                      |                                                          |                  |
| 24 |                      |                      |                                                          |                  |
| 25 |                      |                      |                                                          |                  |
| 26 | Auditing             | <a href="#">#23</a>  | Frequency and procedures for auditing trial conduct,     | Detailed in      |
| 27 |                      |                      | if any, and whether the process will be independent      | supplementary    |
| 28 |                      |                      | from investigators and the sponsor                       | information file |
| 29 |                      |                      |                                                          |                  |
| 30 |                      |                      |                                                          |                  |
| 31 | <b>Ethics and</b>    |                      |                                                          |                  |
| 32 | <b>dissemination</b> |                      |                                                          |                  |
| 33 |                      |                      |                                                          |                  |
| 34 |                      |                      |                                                          |                  |
| 35 | Research ethics      | <a href="#">#24</a>  | Plans for seeking research ethics committee /            | 12               |
| 36 | approval             |                      | institutional review board (REC / IRB) approval          |                  |
| 37 |                      |                      |                                                          |                  |
| 38 |                      |                      |                                                          |                  |
| 39 | Protocol             | <a href="#">#25</a>  | Plans for communicating important protocol               | 11               |
| 40 | amendments           |                      | modifications (eg, changes to eligibility criteria,      |                  |
| 41 |                      |                      | outcomes, analyses) to relevant parties (eg,             |                  |
| 42 |                      |                      | investigators, REC / IRBs, trial participants, trial     |                  |
| 43 |                      |                      | registries, journals, regulators)                        |                  |
| 44 |                      |                      |                                                          |                  |
| 45 |                      |                      |                                                          |                  |
| 46 |                      |                      |                                                          |                  |
| 47 | Consent or assent    | <a href="#">#26a</a> | Who will obtain informed consent or assent from          | 12.              |
| 48 |                      |                      | potential trial participants or authorised surrogates,   |                  |
| 49 |                      |                      | and how (see Item 32)                                    |                  |
| 50 |                      |                      |                                                          | Also detailed in |
| 51 |                      |                      |                                                          | supplementary    |
| 52 |                      |                      |                                                          | information file |
| 53 |                      |                      |                                                          |                  |
| 54 |                      |                      |                                                          |                  |
| 55 | Consent or assent:   | <a href="#">#26b</a> | Additional consent provisions for collection and use     | Detailed in      |
| 56 | ancillary studies    |                      | of participant data and biological specimens in          | supplementary    |
| 57 |                      |                      | ancillary studies, if applicable                         | information file |
| 58 |                      |                      |                                                          |                  |
| 59 |                      |                      |                                                          |                  |
| 60 |                      |                      |                                                          |                  |

|    |                                             |                      |                                                                                                                                                                                                                                                                                     |                                            |
|----|---------------------------------------------|----------------------|-------------------------------------------------------------------------------------------------------------------------------------------------------------------------------------------------------------------------------------------------------------------------------------|--------------------------------------------|
| 1  | Confidentiality                             | <a href="#">#27</a>  | How personal information about potential and enrolled participants will be collected, shared, and maintained in order to protect confidentiality before, during, and after the trial                                                                                                | Detailed in supplementary information file |
| 2  |                                             |                      |                                                                                                                                                                                                                                                                                     |                                            |
| 3  |                                             |                      |                                                                                                                                                                                                                                                                                     |                                            |
| 4  |                                             |                      |                                                                                                                                                                                                                                                                                     |                                            |
| 5  |                                             |                      |                                                                                                                                                                                                                                                                                     |                                            |
| 6  |                                             |                      |                                                                                                                                                                                                                                                                                     |                                            |
| 7  |                                             |                      |                                                                                                                                                                                                                                                                                     |                                            |
| 8  | Declaration of interests                    | <a href="#">#28</a>  | Financial and other competing interests for principal investigators for the overall trial and each study site                                                                                                                                                                       | 15                                         |
| 9  |                                             |                      |                                                                                                                                                                                                                                                                                     |                                            |
| 10 |                                             |                      |                                                                                                                                                                                                                                                                                     |                                            |
| 11 | Data access                                 | <a href="#">#29</a>  | Statement of who will have access to the final trial dataset, and disclosure of contractual agreements that limit such access for investigators                                                                                                                                     | n/a                                        |
| 12 |                                             |                      |                                                                                                                                                                                                                                                                                     |                                            |
| 13 |                                             |                      |                                                                                                                                                                                                                                                                                     |                                            |
| 14 |                                             |                      |                                                                                                                                                                                                                                                                                     |                                            |
| 15 |                                             |                      |                                                                                                                                                                                                                                                                                     |                                            |
| 16 |                                             |                      |                                                                                                                                                                                                                                                                                     |                                            |
| 17 | Ancillary and post trial care               | <a href="#">#30</a>  | Provisions, if any, for ancillary and post-trial care, and for compensation to those who suffer harm from trial participation                                                                                                                                                       | Detailed in supplementary information file |
| 18 |                                             |                      |                                                                                                                                                                                                                                                                                     |                                            |
| 19 |                                             |                      |                                                                                                                                                                                                                                                                                     |                                            |
| 20 |                                             |                      |                                                                                                                                                                                                                                                                                     |                                            |
| 21 |                                             |                      |                                                                                                                                                                                                                                                                                     |                                            |
| 22 | Dissemination policy: trial results         | <a href="#">#31a</a> | Plans for investigators and sponsor to communicate trial results to participants, healthcare professionals, the public, and other relevant groups (eg, via publication, reporting in results databases, or other data sharing arrangements), including any publication restrictions | 2, 13                                      |
| 23 |                                             |                      |                                                                                                                                                                                                                                                                                     |                                            |
| 24 |                                             |                      |                                                                                                                                                                                                                                                                                     |                                            |
| 25 |                                             |                      |                                                                                                                                                                                                                                                                                     |                                            |
| 26 |                                             |                      |                                                                                                                                                                                                                                                                                     |                                            |
| 27 |                                             |                      |                                                                                                                                                                                                                                                                                     |                                            |
| 28 |                                             |                      |                                                                                                                                                                                                                                                                                     |                                            |
| 29 |                                             |                      |                                                                                                                                                                                                                                                                                     |                                            |
| 30 |                                             |                      |                                                                                                                                                                                                                                                                                     |                                            |
| 31 |                                             |                      |                                                                                                                                                                                                                                                                                     |                                            |
| 32 | Dissemination policy: authorship            | <a href="#">#31b</a> | Authorship eligibility guidelines and any intended use of professional writers                                                                                                                                                                                                      | n/a                                        |
| 33 |                                             |                      |                                                                                                                                                                                                                                                                                     |                                            |
| 34 |                                             |                      |                                                                                                                                                                                                                                                                                     |                                            |
| 35 |                                             |                      |                                                                                                                                                                                                                                                                                     |                                            |
| 36 | Dissemination policy: reproducible research | <a href="#">#31c</a> | Plans, if any, for granting public access to the full protocol, participant-level dataset, and statistical code                                                                                                                                                                     | 13                                         |
| 37 |                                             |                      |                                                                                                                                                                                                                                                                                     |                                            |
| 38 |                                             |                      |                                                                                                                                                                                                                                                                                     |                                            |
| 39 |                                             |                      |                                                                                                                                                                                                                                                                                     |                                            |
| 40 |                                             |                      |                                                                                                                                                                                                                                                                                     |                                            |
| 41 | <b>Appendices</b>                           |                      |                                                                                                                                                                                                                                                                                     |                                            |
| 42 |                                             |                      |                                                                                                                                                                                                                                                                                     |                                            |
| 43 | Informed consent materials                  | <a href="#">#32</a>  | Model consent form and other related documentation given to participants and authorised surrogates                                                                                                                                                                                  | Supplementary files provided               |
| 44 |                                             |                      |                                                                                                                                                                                                                                                                                     |                                            |
| 45 |                                             |                      |                                                                                                                                                                                                                                                                                     |                                            |
| 46 |                                             |                      |                                                                                                                                                                                                                                                                                     |                                            |
| 47 | Biological specimens                        | <a href="#">#33</a>  | Plans for collection, laboratory evaluation, and storage of biological specimens for genetic or molecular analysis in the current trial and for future use in ancillary studies, if applicable                                                                                      | n/a                                        |
| 48 |                                             |                      |                                                                                                                                                                                                                                                                                     |                                            |
| 49 |                                             |                      |                                                                                                                                                                                                                                                                                     |                                            |
| 50 |                                             |                      |                                                                                                                                                                                                                                                                                     |                                            |
| 51 |                                             |                      |                                                                                                                                                                                                                                                                                     |                                            |
| 52 |                                             |                      |                                                                                                                                                                                                                                                                                     |                                            |
| 53 |                                             |                      |                                                                                                                                                                                                                                                                                     |                                            |

None The SPIRIT checklist is distributed under the terms of the Creative Commons Attribution License CC-BY-ND 3.0. This checklist can be completed online using <https://www.goodreports.org/>, a tool made by the [EQUATOR Network](#) in collaboration with [Penelope.ai](#)



# BMJ Open

**The effect of intensive treatment for schistosomiasis on immune responses to vaccines among rural Ugandan island adolescents: randomised controlled trial protocol A for the 'POPulation differences in VACcine responses' (POPVAC) programme**

|                               |                                                                                                                                                                                                                                                                                                                                                                                                                                                                                                                                                                                                                                                                                                                                                                                                                                                                                                                                                                                                                                                                                                                                                                                                                                                                                                                                                                                                                                                                                                                                                                                                                                                                                                                                                                                                                                                                                                                                                                                               |
|-------------------------------|-----------------------------------------------------------------------------------------------------------------------------------------------------------------------------------------------------------------------------------------------------------------------------------------------------------------------------------------------------------------------------------------------------------------------------------------------------------------------------------------------------------------------------------------------------------------------------------------------------------------------------------------------------------------------------------------------------------------------------------------------------------------------------------------------------------------------------------------------------------------------------------------------------------------------------------------------------------------------------------------------------------------------------------------------------------------------------------------------------------------------------------------------------------------------------------------------------------------------------------------------------------------------------------------------------------------------------------------------------------------------------------------------------------------------------------------------------------------------------------------------------------------------------------------------------------------------------------------------------------------------------------------------------------------------------------------------------------------------------------------------------------------------------------------------------------------------------------------------------------------------------------------------------------------------------------------------------------------------------------------------|
| Journal:                      | <i>BMJ Open</i>                                                                                                                                                                                                                                                                                                                                                                                                                                                                                                                                                                                                                                                                                                                                                                                                                                                                                                                                                                                                                                                                                                                                                                                                                                                                                                                                                                                                                                                                                                                                                                                                                                                                                                                                                                                                                                                                                                                                                                               |
| Manuscript ID                 | bmjopen-2020-040426.R2                                                                                                                                                                                                                                                                                                                                                                                                                                                                                                                                                                                                                                                                                                                                                                                                                                                                                                                                                                                                                                                                                                                                                                                                                                                                                                                                                                                                                                                                                                                                                                                                                                                                                                                                                                                                                                                                                                                                                                        |
| Article Type:                 | Protocol                                                                                                                                                                                                                                                                                                                                                                                                                                                                                                                                                                                                                                                                                                                                                                                                                                                                                                                                                                                                                                                                                                                                                                                                                                                                                                                                                                                                                                                                                                                                                                                                                                                                                                                                                                                                                                                                                                                                                                                      |
| Date Submitted by the Author: | 19-Nov-2020                                                                                                                                                                                                                                                                                                                                                                                                                                                                                                                                                                                                                                                                                                                                                                                                                                                                                                                                                                                                                                                                                                                                                                                                                                                                                                                                                                                                                                                                                                                                                                                                                                                                                                                                                                                                                                                                                                                                                                                   |
| Complete List of Authors:     | Nkurunungi, Gyaviira; MRC/UVRI and LSHTM Uganda Research Unit, Immunomodulation and Vaccines Programme<br>Zirimenya , Ludoviko ; MRC/UVRI and LSHTM Uganda Research Unit, Immunomodulation and Vaccines Programme<br>Nassuuna , Jacent; MRC/UVRI and LSHTM Uganda Research Unit, Immunomodulation and Vaccines Programme<br>Natukunda , Agnes ; MRC/UVRI and LSHTM Uganda Research Unit, Immunomodulation and Vaccines Programme<br>Kabuubi , Prossy ; MRC/UVRI and LSHTM Uganda Research Unit, Immunomodulation and Vaccines Programme<br>Niwagaba , Emmanuel ; MRC/UVRI and LSHTM Uganda Research Unit, Immunomodulation and Vaccines Programme<br>Oduru, Gloria; MRC/UVRI and LSHTM Uganda Research Unit, Immunomodulation and Vaccines Programme<br>Kabami , Grace ; MRC/UVRI and LSHTM Uganda Research Unit, Immunomodulation and Vaccines Programme<br>Amongin , Rebecca ; MRC/UVRI and LSHTM Uganda Research Unit, Immunomodulation and Vaccines Programme<br>Mutebe , Alex ; MRC/UVRI and LSHTM Uganda Research Unit, Immunomodulation and Vaccines Programme<br>Namutebi , Milly ; MRC/UVRI and LSHTM Uganda Research Unit, Immunomodulation and Vaccines Programme<br>Zziwa , Christopher ; MRC/UVRI and LSHTM Uganda Research Unit, Immunomodulation and Vaccines Programme<br>Amongi, Susan; MRC/UVRI and LSHTM Uganda Research Unit, Immunomodulation and Vaccines Programme<br>Ninsiima , Caroline ; MRC/UVRI and LSHTM Uganda Research Unit, Immunomodulation and Vaccines Programme<br>Onen, Caroline; MRC/UVRI and LSHTM Uganda Research Unit, Immunomodulation and Vaccines Programme<br>Akello , Florence ; MRC/UVRI and LSHTM Uganda Research Unit, Immunomodulation and Vaccines Programme<br>Sewankambo, Moses; MRC/UVRI and LSHTM Uganda Research Unit, Immunomodulation and Vaccines Programme<br>Kiwankambo, Samuel; MRC/UVRI and LSHTM Uganda Research Unit, Immunomodulation and Vaccines Programme<br>Kizindo , Robert ; MRC/UVRI and LSHTM Uganda Research Unit, |



|                                                    |                                                                                                                                                                                                                                                                                                                                                                                                                                                                                                                                                                                                                                                                      |
|----------------------------------------------------|----------------------------------------------------------------------------------------------------------------------------------------------------------------------------------------------------------------------------------------------------------------------------------------------------------------------------------------------------------------------------------------------------------------------------------------------------------------------------------------------------------------------------------------------------------------------------------------------------------------------------------------------------------------------|
|                                                    | <p>Immunomodulation and Vaccines Programme<br/> Kaweesa, James; Republic of Uganda Ministry of Health, Vector Control Division<br/> Cose , Stephen ; MRC/UVRI and LSHTM Uganda Research Unit, Immunomodulation and Vaccines Programme; London School of Hygiene and Tropical Medicine Department of Clinical Research<br/> Webb, Emily; London School of Hygiene &amp; Tropical Medicine, MRC Tropical Epidemiology Group, Department of Infectious Disease Epidemiology<br/> Elliott, Alison ; MRC/UVRI and LSHTM Uganda Research Unit, Immunomodulation and Vaccines Programme; London School of Hygiene and Tropical Medicine Department of Clinical Research</p> |
| <b>&lt;b&gt;Primary Subject Heading&lt;/b&gt;:</b> | Infectious diseases                                                                                                                                                                                                                                                                                                                                                                                                                                                                                                                                                                                                                                                  |
| Secondary Subject Heading:                         | Epidemiology, Immunology (including allergy), Public health                                                                                                                                                                                                                                                                                                                                                                                                                                                                                                                                                                                                          |
| Keywords:                                          | Infection control < INFECTIOUS DISEASES, PARASITOLOGY, Public health < INFECTIOUS DISEASES, Immunology < TROPICAL MEDICINE, Epidemiology < TROPICAL MEDICINE, Paediatric infectious disease & immunisation < PAEDIATRICS                                                                                                                                                                                                                                                                                                                                                                                                                                             |
|                                                    |                                                                                                                                                                                                                                                                                                                                                                                                                                                                                                                                                                                                                                                                      |

SCHOLARONE™  
Manuscripts



I, the Submitting Author has the right to grant and does grant on behalf of all authors of the Work (as defined in the below author licence), an exclusive licence and/or a non-exclusive licence for contributions from authors who are: i) UK Crown employees; ii) where BMJ has agreed a CC-BY licence shall apply, and/or iii) in accordance with the terms applicable for US Federal Government officers or employees acting as part of their official duties; on a worldwide, perpetual, irrevocable, royalty-free basis to BMJ Publishing Group Ltd ("BMJ") its licensees and where the relevant Journal is co-owned by BMJ to the co-owners of the Journal, to publish the Work in this journal and any other BMJ products and to exploit all rights, as set out in our [licence](#).

The Submitting Author accepts and understands that any supply made under these terms is made by BMJ to the Submitting Author unless you are acting as an employee on behalf of your employer or a postgraduate student of an affiliated institution which is paying any applicable article publishing charge ("APC") for Open Access articles. Where the Submitting Author wishes to make the Work available on an Open Access basis (and intends to pay the relevant APC), the terms of reuse of such Open Access shall be governed by a Creative Commons licence – details of these licences and which [Creative Commons](#) licence will apply to this Work are set out in our licence referred to above.

Other than as permitted in any relevant BMJ Author's Self Archiving Policies, I confirm this Work has not been accepted for publication elsewhere, is not being considered for publication elsewhere and does not duplicate material already published. I confirm all authors consent to publication of this Work and authorise the granting of this licence.

1  
2  
3 1 **The effect of intensive treatment for schistosomiasis on immune responses to vaccines among**  
4 **rural Ugandan island adolescents: randomised controlled trial protocol A for the ‘POPulation**  
5 **differences in VACCine responses’ (POPVAC) programme**  
6  
7

8  
9 4 Gyaviira Nkurunungi<sup>1,¶,\*</sup>, Ludoviko Zirimenya<sup>1,¶</sup>, Jacent Nassuuna<sup>1,¶</sup>, Agnes Natukunda<sup>1,¶</sup>, Prossy N  
10 Kabuubi<sup>1</sup>, Emmanuel Niwagaba<sup>1</sup>, Gloria Oduru<sup>1</sup>, Grace Kabami<sup>1</sup>, Rebecca Amongin<sup>1</sup>, Alex Mutebe<sup>1</sup>,  
11 Milly Namutebi<sup>1</sup>, Christopher Zziwa<sup>1</sup>, Susan Amongi<sup>1</sup>, Caroline Ninsiima<sup>1</sup>, Caroline Onen<sup>1</sup>, Florence  
12 Akello<sup>1</sup>, Moses Sewankambo<sup>1</sup>, Samuel Kiwanuka<sup>1</sup>, Robert Kizindo<sup>1</sup>, James Kaweesa<sup>2</sup>, Stephen Cose<sup>1,3</sup>,  
13 Emily L Webb<sup>4</sup>, Alison M Elliott<sup>1,3</sup> **for the POPVAC trial team**  
14  
15  
16  
17  
18  
19

20 10 <sup>1</sup>Immunomodulation and Vaccines Programme, Medical Research Council/Uganda Virus Research  
21 Institute and London School of Hygiene and Tropical Medicine (MRC/UVRI and LSHTM) Uganda  
22  
23 12 Research Unit, Entebbe, Uganda  
24

25 13 <sup>2</sup>Vector Control Division, Ministry of Health, Kampala, Uganda  
26

27 14 <sup>3</sup>Department of Clinical Research, London School of Hygiene and Tropical Medicine, London, United  
28 Kingdom  
29

30 16 <sup>4</sup>MRC Tropical Epidemiology Group, Department of Infectious Disease Epidemiology, London School  
31 of Hygiene and Tropical Medicine, London, United Kingdom  
32  
33

34 18 <sup>¶</sup>These authors contributed equally  
35  
36

37 19 **\*Correspondence:** Gyaviira Nkurunungi; [Gyaviira.Nkurunungi@mrcuganda.org](mailto:Gyaviira.Nkurunungi@mrcuganda.org)  
38  
39  
40  
41  
42  
43  
44  
45  
46  
47  
48  
49  
50  
51  
52  
53  
54  
55  
56  
57  
58  
59  
60

1  
2  
3 **20 Abstract**  
4

5 **21 Introduction**  
6

7  
8 Several licensed and investigational vaccines have lower efficacy, and induce impaired immune  
9  
10 responses, in low-income versus high-income countries and in rural, versus urban, settings.  
11  
12 Understanding these population differences is essential to optimising vaccine effectiveness in the  
13  
14 tropics. We suggest that repeated exposure to and immunomodulation by chronic helminth  
15  
16 infections partly explains population differences in vaccine response.  
17

18 **27 Methods and analysis**  
19

20  
21 We have designed an individually randomised, parallel group trial of intensive versus standard  
22  
23 praziquantel (PZQ) intervention against schistosomiasis, to determine effects on vaccine response  
24  
25 outcomes among school-going adolescents (9 to 17 years) from rural *Schistosoma mansoni* (*Sm*)-  
26  
27 endemic Ugandan islands. Vaccines to be studied comprise BCG on day 'zero'; yellow fever, oral  
28  
29 typhoid and Human Papilloma Virus (HPV) vaccines at week 4; and HPV and Tetanus/diphtheria  
30  
31 booster vaccine at week 28. The intensive arm will receive PZQ doses three times, each two weeks  
32  
33 apart, before BCG immunisation, followed by a dose at week 8 and quarterly thereafter. The  
34  
35 standard arm will receive PZQ at week 8 and week 52. We expect to enrol 480 participants, with 80%  
36  
37 *Sm* infected at the outset.

38  
39 Primary outcomes are BCG-specific IFN- $\gamma$  ELISpot responses eight weeks after BCG immunisation and  
40  
41 for other vaccines, antibody responses to key vaccine antigens at four weeks after immunisation.  
42  
43 Secondary analyses will determine effects of intensive anthelmintic treatment on correlates of  
44  
45 protective immunity, on vaccine response waning, on priming vs boosting immunisations, and on *Sm*  
46  
47 infection status and intensity. Exploratory immunology assays using archived samples will enable  
48  
49 assessment of mechanistic links between helminths and vaccine responses.  
50

51 **43 Ethics and dissemination**  
52

53  
54 Ethics approval has been obtained from relevant Ugandan and UK ethics committees. Results will be  
55  
56 shared with Uganda Ministry of Health, relevant district councils, community leaders and study  
57  
58 participants. Further dissemination will be done through conference proceedings and publications.  
59

60 **47 Trial registration**

48 Current Controlled Trials identifier: ISRCTN60517191.  
49  
50  
51  
52  
53  
54  
55  
56  
57  
58  
59  
60

1  
2  
3 50 **Article summary**  
4

5 51 *Strengths and limitations of this study*  
6

- 7 52
- 8 • This will be the first adequately powered intervention study to investigate effects of  
9 schistosomiasis treatment on vaccine responses in adolescents.  
10
  - 11 54 • Effects on both live-attenuated and inert vaccines will be studied.  
12
  - 13 55 • Our strong immunoepidemiological design and nested immunological studies will address  
14 56 specific hypotheses regarding pathways of effects.  
15
  - 16 57 • The sample archives developed will provide a major asset for exploration of new leads  
17 58 arising from this hypothesis-driven work, or for an alternative, “systems biology” approach  
19 59 investigating (for example) transcriptome, microbiome and virome.  
20
  - 21 60 • Even with intensive anthelmintic intervention, it may be difficult to “successfully” treat  
22 61 *Schistosoma* infection in our endemic setting due to re-infections; however, we still expect a  
24 62 substantial difference in intensity between the two trial arms.  
25
- 26  
27 63

28 64 **Word count**  
29

30 65 3250  
31

32 66 **Keywords**  
33

34 67 Vaccine; Schistosomiasis; Praziquantel; Immunization  
35  
36  
37  
38  
39  
40  
41  
42  
43  
44  
45  
46  
47  
48  
49  
50  
51  
52  
53  
54  
55  
56  
57  
58  
59  
60

## 68 Introduction

69 Vaccine-specific immune responses are often impaired, and vaccine efficacy and effectiveness lower,  
70 in tropical low-income countries (LICs) compared to temperate high-income countries and in rural,  
71 compared to urban, LIC settings.<sup>1-8</sup> This has been recognised for both live vaccines (such as BCG,<sup>2,3,5,9</sup>  
72 polio,<sup>1</sup> yellow fever<sup>4</sup> vaccines) and non-live vaccines (such as influenza<sup>10</sup> and tetanus<sup>11</sup>).

73 Investigational malaria<sup>7</sup> and viral-vectored tuberculosis<sup>6</sup> and Ebola<sup>12</sup> vaccines are also affected.

74 Previous exposure to the target pathogen (or related organisms) may mask the benefit of the  
75 vaccine.<sup>13,14</sup> However, pre-vaccination exposure does not explain why Ebola trial vaccine-specific

76 responses differ between healthy UK and Senegalese adults,<sup>12</sup> as the target organism is rare.

77 Therefore, environmentally-dependent mechanisms may play an important role.<sup>5</sup>

78 A long-held hypothesis is that parasites, particularly helminths, modulate vaccine responses through

79 profound pre- and post-immunisation bystander effects on immunological activation and

80 regulation.<sup>15-17</sup> Helminths might also impact vaccines responses through interactions with the

81 complex ecosystem of mammalian gut bacteria, fungi, protozoa and viruses (the “trans-kingdom”

82 concept<sup>18</sup> detailed elsewhere in this journal [bmjopen-2020-040425]). Helminth-induced gut mucosa

83 damage, the associated translocation of microbial products into the systemic circulation<sup>19-21</sup> and

84 systemic immune activation or regulation mediated by microbial products might contribute to

85 modulation of responses to vaccines and other infections.

86 Helminth-mediated modulation of vaccine responses has not been substantiated in human

87 populations. No appropriately powered trials have been conducted to evaluate reversibility of their

88 effects. In animal models, helminths generally impair priming and accelerate waning of vaccine

89 responses, although effects vary with helminth species, vaccine type and the timing of infection and

90 immunisation.<sup>22</sup> Most observational studies in humans also suggest suppressed or biased responses

91 during helminth infection, especially during systemic infections, such as schistosomiasis and the

92 filariases. There is modest evidence that treating geohelminths in humans improves responses to

93 BCG<sup>23,24</sup> or oral cholera vaccine<sup>25</sup> and we found that schistosomiasis treatment improved the

94 measles-booster response in pre-school children.<sup>26</sup> There is therefore a strong case for a

95 comprehensive assessment of the effects of helminths and their treatment on vaccine responses.

96 The extent to which helminths and related “trans-kingdom” mediators causally and reversibly

97 impact immunological characteristics associated with vaccine responses may best be determined by

98 intervention studies. This trial protocol A of the ‘Population differences in Vaccine responses’

99 programme (POPVAC A; Current Controlled Trials identifier: ISRCTN60517191) has been designed to

100 evaluate the effect of *Schistosoma mansoni* and its treatment on vaccine responses. This study is

1  
2  
3  
4  
5  
6  
7  
8  
9  
10  
11  
12  
13  
14  
15  
16  
17  
18  
19  
20  
21  
22  
23  
24  
25  
26  
27  
28  
29  
30  
31  
32  
33  
34  
35  
36  
37  
38  
39  
40  
41  
42  
43  
44  
45  
46  
47  
48  
49  
50  
51  
52  
53  
54  
55  
56  
57  
58  
59  
60

101 one of three parallel trials whose designs and cross-cutting analyses are described separately in this  
102 journal (bmjopen-2020-040425, bmjopen-2020-040427 and bmjopen-2020-040430).

For peer review only

1  
2  
3 103 **Hypothesis**  
4

5 104 The overarching goal of the POPVAC programme is to understand population differences in vaccine  
6  
7 105 responses in Uganda, in order to identify strategies through which vaccine effectiveness can be  
8  
9 106 optimised for the low-income, tropical settings where they are especially needed. For this Trial A, we  
10  
11 107 focus on the hypothesis that *Schistosoma mansoni* infection suppresses responses to unrelated  
12  
13 108 vaccines; and that this effect can be reversed, at least in part, by intensive praziquantel treatment  
14  
15 109 intervention.

16 110 **Objective**

17  
18 111 To determine whether there are reversible effects of chronic *Schistosoma mansoni* infection on  
19  
20 112 vaccine response in adolescents, using an intervention study.  
21  
22  
23  
24  
25  
26  
27  
28  
29  
30  
31  
32  
33  
34  
35  
36  
37  
38  
39  
40  
41  
42  
43  
44  
45  
46  
47  
48  
49  
50  
51  
52  
53  
54  
55  
56  
57  
58  
59  
60



## 113 **Methods and analysis**

### 114 ***Setting and participants***

115 SPIRIT reporting guidelines<sup>27</sup> have been used. We will conduct an individually randomised, parallel  
116 group trial of intensive versus standard intervention against schistosomiasis (described below) in the  
117 *S. mansoni*-endemic Koome islands of Lake Victoria, Mukono district, Uganda.<sup>28</sup> We aim to enroll 480  
118 participants, randomising 240 to each intervention arm. The study cohort will recruit participants  
119 aged 9 to 17 years in primary school years 1 to 6. Adolescents<sup>29</sup> in this study setting bear a heavy  
120 parasite burden.<sup>30</sup> In addition, this age-group is a target group for vaccines against sexually  
121 transmitted infections (currently human papilloma virus [HPV] – in future, it is hoped, for vaccines  
122 against HIV) and for booster immunisations.

### 123 ***Recruitment criteria***

#### 124 *Inclusion criteria*

- 125 i. Attending the selected school and planning to continue to attend the school for the duration  
126 of the study
- 127 ii. Aged 9 to 17 years and enrolled in primary 1 to 6 (to avoid primary leaving examinations in  
128 late year 7, and loss to follow up of children leaving after primary 7)
- 129 iii. Written informed assent by participant and consent by parent or guardian
- 130 iv. Females agree to avoid pregnancy for the duration of the trial
- 131 v. Willing to provide locator information and to be contacted during the course of the trial
- 132 vi. Able and willing (in the investigator's opinion) to comply with all the study requirements

#### 133 *Exclusion criteria*

- 134 i. Clinically significant history of immunodeficiency (including HIV), cancer, cardiovascular  
135 disease, gastrointestinal disease, liver disease, renal disease, endocrine disorder and  
136 neurological illness
- 137 ii. History of serious psychiatric condition or disorder
- 138 iii. Moderate or severe acute illness characterised by any of the following symptoms: fever,  
139 impaired consciousness, convulsions, difficulty in breathing, vomiting; or as otherwise  
140 determined by the attending project clinician.
- 141 iv. Concurrent oral or systemic steroid medication or the concurrent use of other  
142 immunosuppressive agents within 2 months prior to enrolment
- 143 v. History of allergic reaction to immunisation or any allergy likely to be exacerbated by any  
144 component of the study vaccines including egg or chicken proteins

- 1  
2  
3 145 vi. History of previous immunisation with Yellow Fever (YF), oral typhoid or Human Papillomavirus  
4 146 (HPV) vaccine; previous immunisation with BCG or Tetanus and diphtheria vaccine (Td) at age  
5 147  $\geq 5$  years  
6  
7 148 vii. Tendency to develop keloid scars  
8  
9 149 viii. Haemoglobin less than 82g/L  
10  
11 150 ix. Positive HIV serology  
12  
13 151 x. Positive pregnancy test  
14  
15 152 xi. Female currently lactating, confirmed pregnancy or intention to become pregnant during the  
16 153 trial period  
17  
18 154 xii. Use of an investigational medicinal product or non-registered drug, live vaccine, or medical  
19 155 device other than the study vaccines for 30 days prior to dosing with the study vaccine, or  
20 156 planned use during the study period  
21  
22 157 xiii. Administration of immunoglobulins and/or any blood products within the three months  
23 158 preceding the planned trial immunisation date  
24  
25  
26

27 159 Further information on recruitment criteria can be found in Supplementary information.  
28

### 29 160 **Interventions**

30  
31 161 We will individually randomise participants to intensive or standard praziquantel (PZQ) treatment, in  
32 162 a 1:1 ratio. The intensive arm will receive three doses of PZQ (approximately 40mg/kg, assessed by  
33 163 height pole<sup>31</sup>) each two weeks apart prior to the first immunisation (the last of these 2-3 weeks before  
34 164 immunisation), followed by PZQ at 8 weeks (after primary endpoint sampling) and thereafter quarterly  
35 165 PZQ (approximately; timings adjusted to accommodate school terms) during follow up. The standard  
36 166 arm will receive their first dose of PZQ at week 8 (after immunisation and after primary endpoint  
37 167 sampling) and a second dose at week 52 (to conform to Uganda Ministry of Health policy, which is  
38 168 annual treatment) (**Figure 1**). No placebo will be used in this trial because all participants will be  
39 169 treated (albeit at different frequencies) and participants are unlikely to seek additional treatments  
40 170 outside the trial schedule: praziquantel treatment is not popular because of the recognised (although  
41 171 temporary) adverse effects (described in Supplementary information).  
42  
43  
44  
45  
46  
47  
48  
49

### 50 172 **Randomisation and allocation to treatment arm**

51  
52 173 A randomisation code will be generated by an independent statistician using a randomly permuted  
53 174 block size (sizes 4, 6, 8 and 10) and used to allocate participants to either receive quarterly PZQ  
54 175 (intensive arm) or annual PZQ (standard arm). A set of envelopes will be prepared, labelled  
55 176 sequentially with the randomisation numbers and containing a card indicating the corresponding  
56 177 allocation (to intensive or standard treatment). The randomisation code will be kept securely by the  
57  
58  
59  
60

178 trial statistician and made available only to those responsible for providing or preparing the trial  
 179 interventions. A second copy will be held by a data manager or statistician not otherwise involved in  
 180 the trial at the MRC/UVRI and LSHTM Uganda Research Unit. At enrolment, eligibility criteria will be  
 181 checked and eligible participants will be allocated sequentially to the next randomisation number  
 182 until the required sample size is achieved. Randomisation implementation will be done by a clinician  
 183 using the sequentially numbered opaque sealed envelopes. When the next randomisation number in  
 184 the sequence is allocated, the envelope bearing that number will be opened to reveal the allocation.

### 185 **Blinding**

186 Clinicians and participants will not be blinded to the treatment allocation since they will not  
 187 participate in outcome ascertainment; only immunology laboratory staff who are assessing trial  
 188 outcomes will be blinded.

### 189 **Immunisations**

190 We will study a portfolio of licensed vaccines (live and inert, oral and parental, priming and boosting)  
 191 expected to be beneficial (in some cases, already given) to adolescents in Uganda. Our schedule  
 192 (**Table 1**, supplementary **Table S1**) will comprise three main immunisation days (week 0, week 4 and  
 193 week 28). Additional HPV immunisation will be provided for girls aged 14 years or above, and a  
 194 second Tetanus/diphtheria boost will be given after completion of the study, to accord with the  
 195 national Expanded Programme on Immunisation (EPI) routines, but the response to these will not  
 196 specifically be assessed. Further rationale for the selection of vaccines is detailed in the  
 197 Supplementary information.

198

**Table 1. Immunisation schedule**

|                                                                                                                                                                                                                                                                                                                                                                                                                                                                                                                                        | Immunisation week 0                           | Immunisation week 4                           | [Immunisation week 8]                                   | Immunisation week 28                                      | [Immunisation week 52]                        |
|----------------------------------------------------------------------------------------------------------------------------------------------------------------------------------------------------------------------------------------------------------------------------------------------------------------------------------------------------------------------------------------------------------------------------------------------------------------------------------------------------------------------------------------|-----------------------------------------------|-----------------------------------------------|---------------------------------------------------------|-----------------------------------------------------------|-----------------------------------------------|
| <b>Live vaccines</b>                                                                                                                                                                                                                                                                                                                                                                                                                                                                                                                   | BCG vaccination / re-vaccination <sup>1</sup> | Yellow fever (YF-17D)<br>Oral typhoid (Ty21a) |                                                         |                                                           |                                               |
| <b>Non-live vaccines</b>                                                                                                                                                                                                                                                                                                                                                                                                                                                                                                               |                                               | HPV prime <sup>2</sup>                        | HPV boost for girls aged $\geq 14$ years <sup>3,4</sup> | HPV boost <sup>2</sup> and Tetanus/ diphtheria (Td) boost | Tetanus/ diphtheria (Td) boost <sup>4,5</sup> |
| 1. Prior BCG status may vary (data on history and documentation of prior BCG, and presence of a BCG scar, will be documented although these approaches have limitations for determining BCG status)<br>2. Both girls and boys will receive the HPV vaccine<br>3. The National EPI programme recommends three doses of HPV vaccine for older girls<br>4. These doses will be given to comply with guidelines but outcomes specifically relating to these doses will not be assessed<br>5. Priming by immunisation in infancy is assumed |                                               |                                               |                                                         |                                                           |                                               |

199

### 200 ***Schedule of immunisation and sampling***

201 The schedule of immunisation and sampling is outlined in **Figure 1** and **Table S1**. Pre-immunisation  
202 vaccine responses will be assessed in baseline samples. While optimal timings for outcome measures  
203 vary between vaccines, sampling at 8 weeks post BCG and 4 weeks post YF-17D, Ty21a, HPV and Td  
204 is proposed for the primary endpoints, targeting the establishment of memory responses and  
205 approximate peak of antibody responses. A secondary endpoint at one year will assess waning.  
206 Immunisation postponement criteria are detailed in Supplementary information.

### 207 ***Outcomes***

#### 208 *Primary outcomes*

209 These will be assessed in all participants.

- 210 i. **BCG:** BCG-specific IFN- $\gamma$  ELISpot response eight weeks post BCG immunisation.
- 211 ii. **YF-17D:** neutralising antibody titres (plaque-reduction neutralisation test) at four weeks post  
212 YF immunisation.
- 213 iii. **Ty21a:** *Salmonella typhi* lipopolysaccharide (LPS)-specific immunoglobulin (Ig)G concentration  
214 at four weeks post Ty21a immunisation.
- 215 iv. **HPV:** IgG specific for L1-proteins of HPV-16/18 at four weeks post HPV priming immunisation.
- 216 v. **Td:** Tetanus and diphtheria toxoid-specific IgG concentration at four weeks post Td  
217 immunisation.

#### 218 *Secondary outcomes*

219 These will be assessed in all participants and will further investigate estimates of protective  
220 immunity (for vaccines where these are available) and dynamics of the vaccine responses, as well as  
221 the impact of the interventions on parasite clearance.

- 222 i. **Protective immunity.** Proportions with protective neutralising antibody (YF); protective IgG  
223 levels (TT);<sup>32</sup> seroconversion rates (Ty21a) at four weeks post the corresponding  
224 immunisation.
- 225 ii. **Response waning.** Primary outcome measures (all vaccines) repeated at week 52, and area-  
226 under-the curve (AUC) analyses. Parasitic infection may accelerate,<sup>33</sup> and anti-parasitic  
227 interventions delay, waning.
- 228 iii. **Priming versus boosting.** Effects on priming versus boosting will be examined for HPV only,  
229 comparing outcomes four weeks after the first, and four weeks after the second vaccine dose.

1  
2  
3 230 iv. **Current *S. mansoni* infection status and intensity** will be determined by serum/plasma levels  
4 231 of circulating anodic antigen (CAA). The method is quantitative, highly specific for *Schistosoma*  
5 232 infection, and much more sensitive than the conventional Kato Katz method.<sup>34</sup> CAA will be  
6 233 assessed retrospectively on stored samples collected at baseline, on immunisation days, and  
7 234 on primary and secondary endpoint days.

11  
12 235 Furthermore, our sample collection will offer opportunities for an array of exploratory  
13 236 immunological evaluations on stored samples, focusing mainly on vaccine antigen specific outcomes.  
14 237 Exploratory assays will provide further detail on the role of immunological profiles and trans-  
15 238 kingdom effects in mediating helminth modulation of vaccine-specific responses.

### 19 239 ***Evaluation of parasite infection exposure***

20 240 The following measures will also be assessed in all participants, and will be used to describe the  
21 241 general infection-exposure experience of the study participants.

- 22 242 i. **Prior exposure to schistosomiasis** will be evaluated by ELISA for IgG to schistosome egg  
23 243 antigen using stored blood samples collected at baseline.
- 24 244 ii. **The presence of other helminth infections** will be determined retrospectively using stool  
25 245 PCR of samples collected at baseline and at weeks 28 and 52.<sup>30</sup> In accordance with national  
26 246 guidelines, all participants will be treated with albendazole or mebendazole after collection  
27 247 of samples for primary endpoints at week 8 and 28, and after collection of samples for  
28 248 secondary endpoints at week 52.
- 29 249 iii. **Current malaria infection status and intensity** will be assessed retrospectively by PCR on  
30 250 stored samples collected on immunisation days and at week 52. Individuals presenting with  
31 251 fever will be investigated using rapid diagnostic tests for malaria and treated based on the  
32 252 results and according to prevailing national guidelines.
- 33 253 iv. **Prior malaria exposure** will be evaluated by ELISA for IgG to malaria antigen using stored  
34 254 samples collected at baseline.

### 47 255 ***Sample size considerations***

48 256 Based on the literature<sup>4 35 36</sup> and preliminary data, we anticipate that, following log to base 10  
49 257 transformations that will be applied to normalise primary outcome measures, standard deviations  
50 258 (SDs) of primary outcome measures will lie between 0.3 and 0.6 on this log scale, and that effective  
51 259 treatment may increase responses by approximately 0.2 on the log scale (based on Tweyongyere *et*  
52 260 *al.*<sup>26</sup>). We have therefore powered our study to detect differences of this magnitude (0.2 on the log  
53 261 scale) or (in some cases) smaller (**Table 2**). We assume *S. mansoni* prevalence of  $\geq 80\%$ .

262 Based on these assumptions and a two independent samples t-test, we plan to include 480  
 263 participants in total (240 quarterly PZQ, 240 annual PZQ); of whom 384 are expected to be *S.*  
 264 *mansoni* infected,<sup>28</sup> giving 192 participants in each trial arm who are infected at baseline.

265 **Table 2** shows power estimates, for 5% type-1 error rate and assuming 20% loss to follow-up.

266

**Table 2. Power estimates (5% type-1 error rate)**

| Standard deviation (log <sub>10</sub> )                                                                                                                                                                                                                                                       | Difference in mean log <sub>10</sub> transformed outcome, between trial arms |      |      |      |      |      |      |
|-----------------------------------------------------------------------------------------------------------------------------------------------------------------------------------------------------------------------------------------------------------------------------------------------|------------------------------------------------------------------------------|------|------|------|------|------|------|
|                                                                                                                                                                                                                                                                                               | 0.08                                                                         | 0.10 | 0.12 | 0.14 | 0.16 | 0.18 | 0.20 |
| 192 intensive PZQ vs 192 standard PZQ ( <i>S. mansoni</i> infected only)                                                                                                                                                                                                                      |                                                                              |      |      |      |      |      |      |
| 0.3                                                                                                                                                                                                                                                                                           | 65%                                                                          | 83%  | 94%  | 98%  | >99% | >99% | >99% |
| 0.4                                                                                                                                                                                                                                                                                           | 42%                                                                          | 59%  | 75%  | 87%  | 94%  | 98%  | 99%  |
| 0.5                                                                                                                                                                                                                                                                                           | 29%                                                                          | 42%  | 56%  | 69%  | 80%  | 88%  | 94%  |
| 0.6                                                                                                                                                                                                                                                                                           | 21%                                                                          | 31%  | 42%  | 53%  | 65%  | 75%  | 83%  |
| Cells highlighted in grey correspond to >80% power; differences in mean log <sub>10</sub> transformed outcome of 0.08, 0.10, 0.12, 0.14, 0.16, 0.18 and 0.20 are equivalent to geometric mean ratios for untransformed outcomes of 1.20, 1.26, 1.32, 1.38, 1.45, 1.51 and 1.59, respectively. |                                                                              |      |      |      |      |      |      |

267

## 268 ***Ethics and dissemination***

269 Ethical approval has been granted from the Research Ethics Committee of the Uganda Virus  
 270 Research Institute (UVRI REC, reference: GC/127/19/05/664) and the London School of Hygiene and  
 271 Tropical Medicine (LSHTM, reference: 16032), and from the Uganda National Council for Science and  
 272 Technology (UNCST, reference: HS2486) and the Uganda National Drug Authority (NDA, reference:  
 273 CTA0093). Any protocol amendments will be submitted to ethics committees and regulatory bodies  
 274 for approval before implementation.

275 Participants are adolescents and therefore a vulnerable human population. Care will be taken to  
 276 provide adequate, age and education-status appropriate information and to ensure that it is  
 277 understood; and to emphasise that participation is voluntary. Participants will be enrolled only when  
 278 they have given their own assent and when consent has been given by the parent or guardian.  
 279 Model consent and assent forms are shown in Supplementary file 2. No major risks to the  
 280 participants are anticipated since all the treatments and vaccines to be given are licensed and known  
 281 to be safe. The main risk to participants will be time lost from school work: we will work with  
 282 teachers and parents to minimise disruption to classes, and will avoid enrolment of primary 7  
 283 students since these classes are involved in national examinations. Further risks are discussed in  
 284 Supplementary information.

1  
2  
3 285 Study findings will be published through open access peer-reviewed journals, presentations at local,  
4  
5 286 national and international conferences and to the local community through community meetings.  
6  
7 287 Anonymised participant level datasets generated will be available upon request.

### 8 9 288 ***Patient and public involvement***

10  
11 289 Concepts involved in this work have been discussed with colleagues at the Vector Control Division  
12  
13 290 and Expanded Programme on Immunisation in the Ministry of Health (Uganda), with the Mukono  
14  
15 291 District Council and with community leaders and Village Health Teams from Koome subcounty. We  
16  
17 292 also have held meetings to explain the proposed work to teachers, parents, participants and village  
18  
19 293 members, and to address their questions about issues such as study length, the study's ethical  
20  
21 294 approval status, why adults were excluded from the study, and to explain to them why boys will also  
22  
23 295 receive the HPV vaccine. Study findings will be shared with these stakeholders and with participants.

### 24 25 296 ***Data management and analysis***

26  
27 297 Socio-demographic information and clinical and laboratory measurements will be recorded and  
28  
29 298 managed using Research Electronic Data Capture (REDCap) tools,<sup>37 38</sup> with paper-based forms as  
30  
31 299 back-up. All data will be recorded under a unique study ID number. When paper forms must be  
32  
33 300 used, data will be double entered in a study-specific database, with standard checks for  
34  
35 301 discrepancies. All data for analysis will be anonymised and stored on a secure and password-  
36  
37 302 protected server, with access limited to essential research personnel.

38  
39 303 Baseline characteristics including age, sex, school, location of birth, prior vaccination status,  
40  
41 304 helminth infection and prior exposure status and malaria infection and prior exposure status will be  
42  
43 305 summarised by trial arm. The effect of intensive (compared to standard) praziquantel treatment on  
44  
45 306 the outcomes will be analysed. Information on infection status will only be available after  
46  
47 307 randomisation. The primary analysis will be done on individuals identified as infected at baseline  
48  
49 308 (through randomisation, these will be balanced between treatment arms); this will test the  
50  
51 309 hypothesis that treating the infection (and subsequent reinfections) reverses the parasite's effects  
52  
53 310 on vaccine responses. If treating *S. mansoni* reverses adverse parasite effects on vaccine responses,  
54  
55 311 this may be a beneficial public health intervention. However, routine screening for parasite infection  
56  
57 312 before immunisation would be laborious. Secondary analyses will include all randomised individuals;  
58  
59 313 this will provide insight into the broader benefit of the interventions as public health measures. The  
60  
314 effect of intensive versus standard praziquantel treatment on primary outcomes will be assessed  
315 using unpaired t-tests, with results presented as a mean difference in vaccine response measure  
316 together with 95% confidence interval and p-value. For all outcomes, we will investigate adjusting  
317 for corresponding baseline vaccine responses as this may improve the precision of effect estimates;



1  
2  
3 318 this will be done using multivariable regression. We anticipate that outcomes will be positively  
4  
5 319 skewed, and will apply log transformations to normalise distributions before analysis if required. The  
6  
7 320 detailed analytical plan is available on the online trial registration site  
8  
9 321 (<http://www.isrctn.com/ISRCTN60517191>).

10  
11  
12  
13  
14  
15  
16  
17  
18  
19  
20  
21  
22  
23  
24  
25  
26  
27  
28  
29  
30  
31  
32  
33  
34  
35  
36  
37  
38  
39  
40  
41  
42  
43  
44  
45  
46  
47  
48  
49  
50  
51  
52  
53  
54  
55  
56  
57  
58  
59  
60

For peer review only



## 322 Discussion

323 This will be the first adequately powered intervention study to investigate the effect of  
324 schistosomiasis treatment on vaccine responses in adolescents. This study will determine whether *S.*  
325 *mansoni* infection has a causal, reversible, impact on the response to live or inert vaccines, including  
326 effects on vaccine replication, immune response profile, priming, boosting and waning. The results  
327 will add to understanding of population differences in vaccine responses and on interventions that  
328 may enhance responses. If treating helminths improves vaccine responses in adolescents, combined  
329 parasite-control/immunisation programmes offer an attractive, practical public health intervention  
330 for schools and communities.

331 There are risks associated with our approach to addressing the trial objective. **First**, there is a risk of  
332 failure to clear *S. mansoni* infections, and repeated reinfection during the trial. This issue can be  
333 challenging because of incomplete cure or maturation of immature worms after treatment, and  
334 lifestyles in endemic communities that result in repeated exposure. To mitigate this, we will  
335 administer three PZQ treatments over a six-week period before the first immunisations, and  
336 continuing quarterly treatment in the intensive arm. **Second**, there is a risk that *S. mansoni* infection  
337 has long-term effects, not removed by treatment, mediated, for example, by epigenetic change.<sup>39</sup>  
338 However, studies show that parasite treatment results in immunological changes,<sup>40,41</sup> and our data  
339 suggest at least partial recovery of the measles vaccine response among young children treated for  
340 schistosomiasis.<sup>26</sup> By initiating intervention six to eight weeks before the first immunisations, and  
341 providing repeated intervention in the intensive arms, we hope to achieve significant resolution of *S.*  
342 *mansoni* effects.

343 We are interested in the effects of removing *S. mansoni*. Treating parasites can induce acute  
344 immunological change due to release of previously hidden antigens.<sup>42,43</sup> To minimise such effects,  
345 immunisations will be given at least 2 weeks after PZQ (the longest practicable interval; **Figure 1**).

346 Laboratory analyses will also highlight immune parameters and cellular populations that link  
347 environmental exposures to vaccine responses. Identifying processes associated with poor or good  
348 outcomes will inform strategies in vaccine design (for example, the genetic modification of vaccines,  
349 or innovative use of adjuvants, to counter any adverse immunological milieu, currently an area of  
350 intense research for cancer vaccines<sup>44</sup>); ultimately supporting the development of effective vaccines  
351 tailored to the low-income settings that most need them.

352

## 353 Study timeline

1  
2  
3 354 Applications for ethical approval were submitted in May 2018, with approval received in September  
4 355 2018 (Uganda Virus Research Institute Research Ethics Committee), May 2019 (National Drug  
5 356 Authority and Uganda National Council for Science and Technology), June 2019 (London School of  
6 357 Hygiene and Tropical Medicine). Collaborator/investigator/trial steering committee meetings were  
7  
8 358 also held during the initial 12-month planning period. The study began recruitment in July 2019.  
9  
10 359 Intervention will be up to 12 months, with completion of the project scheduled for September 2020.  
11  
12  
13

14 360

### 16 361 **Competing interests**

17  
18 362 Alison Elliott reports a grant from the Medical research Council, UK (POPVAC programme funding).  
19 363 The rest of the authors declare that they have no conflicts of interest.  
20  
21

### 22 364 **Author contributions**

23  
24 365 AME conceived the study. AME, GN, ELW, AN, JN, SC, LZ and JK contributed to study design. LZ, GO,  
25 366 PNK, EN, GK, RA, CN, CO, MN, CZ, SA and FA are site clinicians/nurses/clinical laboratory technicians  
26 367 providing valuable input on clinical considerations of the intervention. MS, SK and RK are field  
27 368 workers handling the organisational integration of the intervention. AN, AM and ELW are involved in  
28 369 organisation of the databases, trial randomization, treatment allocation and drawing up of analytical  
29 370 plans. GN, LZ, JN, AN, SC, ELW and AME drafted the manuscript. All authors reviewed the  
30 371 manuscript, contributed to it and approved the final version.  
31  
32  
33  
34  
35

### 36 372 **Acknowledgements**

37  
38 373 We thank the Uganda National Expanded Programme for Immunisation, Sanofi Pasteur and PaxVax  
39 374 for providing the HPV, yellow fever and oral typhoid vaccines, respectively. The BCG and tetanus-  
40 375 diphtheria vaccines were kind donations from the Serum Institute of India. We thank the Vector  
41 376 Control Division of the Ministry of Health and the Mukono district local government for their  
42 377 support. We also thank members of the POPVAC programme steering committee (chaired by Prof.  
43 378 Richard Hayes) and the Data and Safety Monitoring Board (Dr David Meya, Prof Andrew Prendergast  
44 379 and Dr Elizabeth George).  
45  
46  
47  
48  
49

### 50 380 **Funding**

51  
52 381 The POPVAC programme of work is supported by the Medical Research Council of the United  
53 382 Kingdom (grant number MR/R02118X/1). SC and JN are supported in part by the Makerere  
54 383 University – Uganda Virus Research Institute Centre of Excellence for Infection and Immunity  
55 384 Research and Training (MUII-plus). MUII-plus is funded under the DELTAS Africa Initiative. The  
56 385 DELTAS Africa Initiative is an independent funding scheme of the African Academy of Sciences (AAS),  
57  
58  
59  
60

1  
2  
3 386 Alliance for Accelerating Excellence in Science in Africa (AESA) and supported by the New  
4  
5 387 Partnership for Africa's Development Planning and Coordinating Agency (NEPAD Agency) with  
6  
7 388 funding from the Wellcome Trust (grant 107743) and the UK Government. The MRC/UVRI and  
8  
9 389 LSHTM Uganda Research Unit is jointly funded by the UK Medical Research Council (MRC) and the  
10  
11 390 UK Department for International Development (DFID) under the MRC/DFID Concordat agreement  
12  
13 391 and is also part of the EDCTP2 programme supported by the European Union.

14 392 The study sponsor (London School of Hygiene and Tropical Medicine) and funders had no role in  
15  
16 393 study design; collection, management, analysis, and interpretation of data; writing of the protocol;  
17  
18 394 and the decision to submit the protocol for publication.

19 395 **POPVAC trial team**

20  
21 396 **Principal investigator:** Alison Elliott; **Project leader:** Ludoviko Zirimenya; **laboratory staff:** Gyaviira  
22  
23 397 Nkurunungi, Stephen Cose, Rebecca Amongin, Beatrice Nassanga, Jacent Nassuuna, Irene Nambuya,  
24  
25 398 Prossy Kabuubi, Emmanuel Niwagaba, Gloria Oduru, Grace Kabami; **statisticians and data**  
26  
27 399 **managers:** Emily Webb, Agnes Natukunda, Helen Akurut, Alex Mutebe; **clinicians:** Anne Wajja, Milly  
28  
29 400 Namutebi, Christopher Zziwa, Joel Serubanja; **nurses:** Caroline Onen, Esther Nakazibwe, Josephine  
30  
31 401 Tumusiime, Caroline Ninsiima, Susan Amongi, Florence Akello; **internal monitor:** Mirriam  
32  
33 402 Akello; **field workers:** Robert Kizindo, Moses Sewankambo, Denis Nsubuga, Samuel Kiwanuka, Fred  
34  
35 403 Kiwudhu; **boatman:** David Abiriga; **administrative management:** Moses Kizza, Samsi Nansukusa;  
36  
37 404 **internal and external collaborators:** Pontiano Kaleebu, Hermelijn Smits, Maria Yazdanbakhsh,  
38  
39 405 Govert van Dam, Paul Corstjens, Sarah Staedke, Henry Luzze, James Kaweesa, Edridah Tukahebwa,  
40  
41 406 Elly Tumushabe, Moses Muwanga

407 **References**

- 408 1. Taniuchi M, Platts-Mills JA, Begum S, et al. Impact of enterovirus and other enteric pathogens on oral polio  
409 and rotavirus vaccine performance in Bangladeshi infants. *Vaccine* 2016;34(27):3068-75. doi:  
410 10.1016/j.vaccine.2016.04.080 [published Online First: 2016/05/08]
- 411 2. Fine PE. Variation in protection by BCG: implications of and for heterologous immunity. *Lancet*  
412 1995;346(8986):1339-45.
- 413 3. Black GF, Weir RE, Floyd S, et al. BCG-induced increase in interferon-gamma response to mycobacterial  
414 antigens and efficacy of BCG vaccination in Malawi and the UK: two randomised controlled studies. *Lancet*  
415 2002;359(9315):1393-401. doi: 10.1016/S0140-6736(02)08353-8
- 416 4. Muyanja E, Ssemaganda A, Ngauv P, et al. Immune activation alters cellular and humoral responses to  
417 yellow fever 17D vaccine. *The Journal of clinical investigation* 2014;124(7):3147-58. doi: 10.1172/jci75429  
418 [published Online First: 2014/06/10]
- 419 5. Barreto ML, Pilger D, Pereira SM, et al. Causes of variation in BCG vaccine efficacy: examining evidence from  
420 the BCG REVAC cluster randomised trial to explore the masking and the blocking hypotheses. *Vaccine*  
421 2014;32(30):3759-64. doi: 10.1016/j.vaccine.2014.05.042
- 422 6. Tanner R, Kakalacheva K, Miller E, et al. Serum indoleamine 2,3-dioxygenase activity is associated with  
423 reduced immunogenicity following vaccination with MVA85A. *BMC infectious diseases* 2014;14:660. doi:  
424 10.1186/s12879-014-0660-7 [published Online First: 2014/12/04]
- 425 7. Sissoko MS, Healy SA, Katile A, et al. Safety and efficacy of PfSPZ Vaccine against *Plasmodium falciparum* via  
426 direct venous inoculation in healthy malaria-exposed adults in Mali: a randomised, double-blind phase 1 trial.  
427 *The Lancet Infectious diseases* 2017;17(5):498-509. doi: 10.1016/s1473-3099(17)30104-4 [published Online  
428 First: 2017/02/22]
- 429 8. Venkatraman N, Ndiaye BP, Bowyer G, et al. Safety and Immunogenicity of a Heterologous Prime-Boost  
430 Ebola Virus Vaccine Regimen in Healthy Adults in the United Kingdom and Senegal. *The Journal of infectious*  
431 *diseases* 2018;219(8):1187-97. doi: 10.1093/infdis/jiy639
- 432 9. Barreto ML, Pereira SM, Pilger D, et al. Evidence of an effect of BCG revaccination on incidence of  
433 tuberculosis in school-aged children in Brazil: second report of the BCG-REVAC cluster-randomised trial.  
434 *Vaccine* 2011;29(31):4875-7. doi: 10.1016/j.vaccine.2011.05.023
- 435 10. van Riet E, Adegnikaa AA, Retra K, et al. Cellular and humoral responses to influenza in gabonese children  
436 living in rural and semi-urban areas. *The Journal of infectious diseases* 2007;196(11):1671-8. doi:  
437 10.1086/522010 [published Online First: 2007/11/17]
- 438 11. van Riet E, Retra K, Adegnikaa AA, et al. Cellular and humoral responses to tetanus vaccination in Gabonese  
439 children. *Vaccine* 2008;26(29-30):3690-5. doi: 10.1016/j.vaccine.2008.04.067 [published Online First:  
440 2008/06/10]
- 441 12. Venkatraman N, Ndiaye BP, Bowyer G, et al. Safety and Immunogenicity of a Heterologous Prime-Boost  
442 Ebola Virus Vaccine Regimen in Healthy Adults in the United Kingdom and Senegal. *The Journal of infectious*  
443 *diseases* 2019;219(8):1187-97. doi: 10.1093/infdis/jiy639
- 444 13. Brandt L, Feino Cunha J, Weinreich Olsen A, et al. Failure of the *Mycobacterium bovis* BCG vaccine: some  
445 species of environmental mycobacteria block multiplication of BCG and induction of protective immunity to  
446 tuberculosis. *Infection and immunity* 2002;70(2):672-8. [published Online First: 2002/01/18]
- 447 14. Flaherty DK, Vesosky B, Beamer GL, et al. Exposure to *Mycobacterium avium* can modulate established  
448 immunity against *Mycobacterium tuberculosis* infection generated by *Mycobacterium bovis* BCG vaccination.

- 1  
2  
3 449 *Journal of leukocyte biology* 2006;80(6):1262-71. doi: 10.1189/jlb.0606407 [published Online First:  
4 450 2006/09/14]
- 5  
6 451 15. Maizels RM, McSorley HJ. Regulation of the host immune system by helminth parasites. *The Journal of*  
7 452 *allergy and clinical immunology* 2016;138(3):666-75. doi: 10.1016/j.jaci.2016.07.007 [published Online First:  
8 453 2016/08/02]
- 9  
10 454 16. Wammes LJ, Mpairwe H, Elliott AM, et al. Helminth therapy or elimination: epidemiological,  
11 455 immunological, and clinical considerations. *The Lancet Infectious diseases* 2014;14(11):1150-62. doi:  
12 456 10.1016/S1473-3099(14)70771-6
- 13  
14 457 17. Wammes LJ, Hamid F, Wiria AE, et al. Regulatory T cells in human geohelminth infection suppress immune  
15 458 responses to BCG and *Plasmodium falciparum*. *Eur J Immunol* 2010;40(2):437-42. doi: 10.1002/eji.200939699
- 16  
17 459 18. Pfeiffer JK, Virgin HW. Viral immunity. Transkingdom control of viral infection and immunity in the  
18 460 mammalian intestine. *Science* 2016;351(6270) doi: 10.1126/science.aad5872
- 19  
20 461 19. Onguru D, Liang Y, Griffith Q, et al. Human schistosomiasis is associated with endotoxemia and Toll-like  
21 462 receptor 2- and 4-bearing B cells. *The American journal of tropical medicine and hygiene* 2011;84(2):321-4.  
22 463 doi: 10.4269/ajtmh.2011.10-0397 [published Online First: 2011/02/05]
- 23  
24 464 20. George PJ, Anuradha R, Kumar NP, et al. Evidence of microbial translocation associated with perturbations  
25 465 in T cell and antigen-presenting cell homeostasis in hookworm infections. *PLoS neglected tropical diseases*  
26 466 2012;6(10):e1830. doi: 10.1371/journal.pntd.0001830 [published Online First: 2012/10/12]
- 27  
28 467 21. Rajamanickam A, Munisankar S, Bhootra Y, et al. Microbial Translocation Associated with an Acute-Phase  
29 468 Response and Elevations in MMP-1, HO-1, and Proinflammatory Cytokines in *Strongyloides stercoralis*  
30 469 Infection. *Infection and immunity* 2017;85(1) doi: 10.1128/iai.00772-16 [published Online First: 2016/11/09]
- 31  
32 470 22. Sanya RE, Nkurunungi G, Andia Biraro I, et al. A life without worms. *Transactions of the Royal Society of*  
33 471 *Tropical Medicine and Hygiene* 2017:1-9. doi: 10.1093/trstmh/trx010 [published Online First: 2017/03/25]
- 34  
35 472 23. Elias D, Britton S, Aseffa A, et al. Poor immunogenicity of BCG in helminth infected population is associated  
36 473 with increased in vitro TGF-beta production. *Vaccine* 2008;26(31):3897-902. doi: S0264-410X(08)00540-9  
37 474 [pii]  
38 475 10.1016/j.vaccine.2008.04.083 [published Online First: 2008/06/17]
- 39  
40 476 24. Elias D, Wolday D, Akuffo H, et al. Effect of deworming on human T cell responses to mycobacterial  
41 477 antigens in helminth-exposed individuals before and after bacille Calmette-Guerin (BCG) vaccination. *Clin Exp*  
42 478 *Immunol* 2001;123(2):219-25.
- 43  
44 479 25. Cooper PJ, Chico ME, Losonsky G, et al. Albendazole treatment of children with ascariasis enhances the  
45 480 vibriocidal antibody response to the live attenuated oral cholera vaccine CVD 103-HgR. *The Journal of*  
46 481 *infectious diseases* 2000;182(4):1199-206. doi: 10.1086/315837 [published Online First: 2000/09/09]
- 47  
48 482 26. Tweyongyere R, Nassanga BR, Muhwezi A, et al. Effect of *Schistosoma mansoni* infection and its treatment  
49 483 on antibody responses to measles catch-up immunisation in pre-school children: A randomised trial. *PLoS*  
50 484 *neglected tropical diseases* 2019;13(2):e0007157. doi: 10.1371/journal.pntd.0007157 [published Online First:  
51 485 2019/02/15]
- 52  
53 486 27. Chan AW, Tetzlaff JM, Altman DG, et al. SPIRIT 2013 statement: defining standard protocol items for  
54 487 clinical trials. *Ann Intern Med* 2013;158(3):200-7. doi: 10.7326/0003-4819-158-3-201302050-00583  
55 488 [published Online First: 2013/01/09]
- 56  
57 489 28. Sanya RE, Nkurunungi G, Hoek Spaans R, et al. The Impact of Intensive Versus Standard Anthelmintic  
58 490 Treatment on Allergy-related Outcomes, Helminth Infection Intensity, and Helminth-related Morbidity in  
59 491 Lake Victoria Fishing Communities, Uganda: Results From the LaVIISWA Cluster-randomized Trial. *Clinical*

- 1  
2  
3 492 *infectious diseases : an official publication of the Infectious Diseases Society of America* 2019;68(10):1665-74.  
4 493 doi: 10.1093/cid/ciy761 [published Online First: 2018/09/12]  
5  
6 494 29. WHO. Adolescent Health Research Priorities: Report of a Technical Consultation 2015.  
7 495 [http://apps.who.int/iris/bitstream/10665/203564/1/WHO\\_FWC\\_MCA\\_15\\_07\\_eng.pdf?ua=1](http://apps.who.int/iris/bitstream/10665/203564/1/WHO_FWC_MCA_15_07_eng.pdf?ua=1) (accessed 17th  
8 496 May 2019).  
9  
10 497 30. Webb EL, Nampijja M, Kaweesa J, et al. Helminths are positively associated with atopy and wheeze in  
11 498 Ugandan fishing communities: results from a cross-sectional survey. *Allergy* 2016 doi: 10.1111/all.12867  
12  
13 499 31. Montresor A, Odermatt P, Muth S, et al. The WHO dose pole for the administration of praziquantel is also  
14 500 accurate in non-African populations. *Transactions of the Royal Society of Tropical Medicine and Hygiene*  
15 501 2005;99(1):78-81. doi: 10.1016/j.trstmh.2004.06.006  
16  
17 502 32. Plotkin SA. Correlates of protection induced by vaccination. *Clinical and vaccine immunology : CVI*  
18 503 2010;17(7):1055-65. doi: 10.1128/cvi.00131-10 [published Online First: 2010/05/14]  
19  
20 504 33. Riner DK, Ndombi EM, Carter JM, et al. Schistosoma mansoni Infection Can Jeopardize the Duration of  
21 505 Protective Levels of Antibody Responses to Immunizations against Hepatitis B and Tetanus Toxoid. *PLoS*  
22 506 *neglected tropical diseases* 2016;10(12):e0005180. doi: 10.1371/journal.pntd.0005180  
23  
24 507 34. Corstjens PL, Nyakundi RK, de Dood CJ, et al. Improved sensitivity of the urine CAA lateral-flow assay for  
25 508 diagnosing active Schistosoma infections by using larger sample volumes. *Parasites & vectors* 2015;8:241.  
26 509 doi: 10.1186/s13071-015-0857-7 [published Online First: 2015/04/22]  
27  
28 510 35. Fletcher HA, Snowden MA, Landry B, et al. T-cell activation is an immune correlate of risk in BCG vaccinated  
29 511 infants. *Nat Commun* 2016;7:11290. doi: 10.1038/ncomms11290  
30  
31 512 36. Safaeian M, Porras C, Pan Y, et al. Durable antibody responses following one dose of the bivalent human  
32 513 papillomavirus L1 virus-like particle vaccine in the Costa Rica Vaccine Trial. *Cancer prevention research*  
33 514 *(Philadelphia, Pa)* 2013;6(11):1242-50. doi: 10.1158/1940-6207.capr-13-0203 [published Online First:  
34 515 2013/11/06]  
35  
36 516 37. Harris PA, Taylor R, Minor BL, et al. The REDCap Consortium: Building an International Community of  
37 517 Software Platform Partners. *Journal of biomedical informatics* 2019;103208. doi: 10.1016/j.jbi.2019.103208  
38 518 [published Online First: 2019/05/13]  
39  
40 519 38. Harris PA, Taylor R, Thielke R, et al. Research electronic data capture (REDCap)--a metadata-driven  
41 520 methodology and workflow process for providing translational research informatics support. *Journal of*  
42 521 *biomedical informatics* 2009;42(2):377-81. doi: 10.1016/j.jbi.2008.08.010 [published Online First:  
43 522 2008/10/22]  
44  
45 523 39. Blok BA, Arts RJ, van Crevel R, et al. Trained innate immunity as underlying mechanism for the long-term,  
46 524 nonspecific effects of vaccines. *J Leukoc Biol* 2015;98(3):347-56. doi: 10.1189/jlb.5RI0315-096R  
47  
48 525 40. Watanabe K, Mwinzi PN, Black CL, et al. T regulatory cell levels decrease in people infected with  
49 526 *Schistosoma mansoni* on effective treatment. *The American journal of tropical medicine and hygiene*  
50 527 2007;77(4):676-82. [published Online First: 2007/11/06]  
51  
52 528 41. Schmiedel Y, Mombo-Ngoma G, Labuda LA, et al. CD4+CD25hiFOXP3+ Regulatory T Cells and Cytokine  
53 529 Responses in Human Schistosomiasis before and after Treatment with Praziquantel. *PLoS neglected tropical*  
54 530 *diseases* 2015;9(8):e0003995. doi: 10.1371/journal.pntd.0003995 [published Online First: 2015/08/21]  
55  
56 531 42. van den Biggelaar AHJ, Borrmann S, Kremsner P, et al. Immune Responses Induced by Repeated Treatment  
57 532 Do Not Result in Protective Immunity to *Schistosoma haematobium*: Interleukin (IL)-5 and IL-10 Responses.  
58 533 *The Journal of infectious diseases* 2002;186(10):1474-82. doi: 10.1086/344352  
59  
60



- 1  
2  
3 534 43. Woolhouse MEJ, Hagan P. Seeking the ghost of worms past. *Nature Medicine* 1999;5(11):1225-27. doi:  
4 535 10.1038/15169  
5  
6 536 44. Seledtsov VI, Goncharov AG, Seledtsova GV. Clinically feasible approaches to potentiating cancer cell-based  
7 537 immunotherapies. *Human vaccines & immunotherapeutics* 2015;11(4):851-69. doi:  
8 538 10.1080/21645515.2015.1009814 [published Online First: 2015/05/02]  
9 539

10  
11  
12 540

13  
14  
15 541 **FIGURE LEGENDS**

16  
17 542 **Figure 1. Outline of immunisations and anthelmintic intervention**

18  
19 543 <sup>1</sup>Primary endpoints will be at eight weeks post BCG and four weeks post Yellow fever (YF-17D), oral  
20 544 typhoid (Ty21a), Human Papilloma Virus (HPV) and Tetanus/diphtheria (Td) vaccination.

21  
22 545 <sup>2</sup>Primary endpoint for responses to Td given at 28 weeks.  
23

24 546  
25  
26  
27  
28  
29  
30  
31  
32  
33  
34  
35  
36  
37  
38  
39  
40  
41  
42  
43  
44  
45  
46  
47  
48  
49  
50  
51  
52  
53  
54  
55  
56  
57  
58  
59  
60

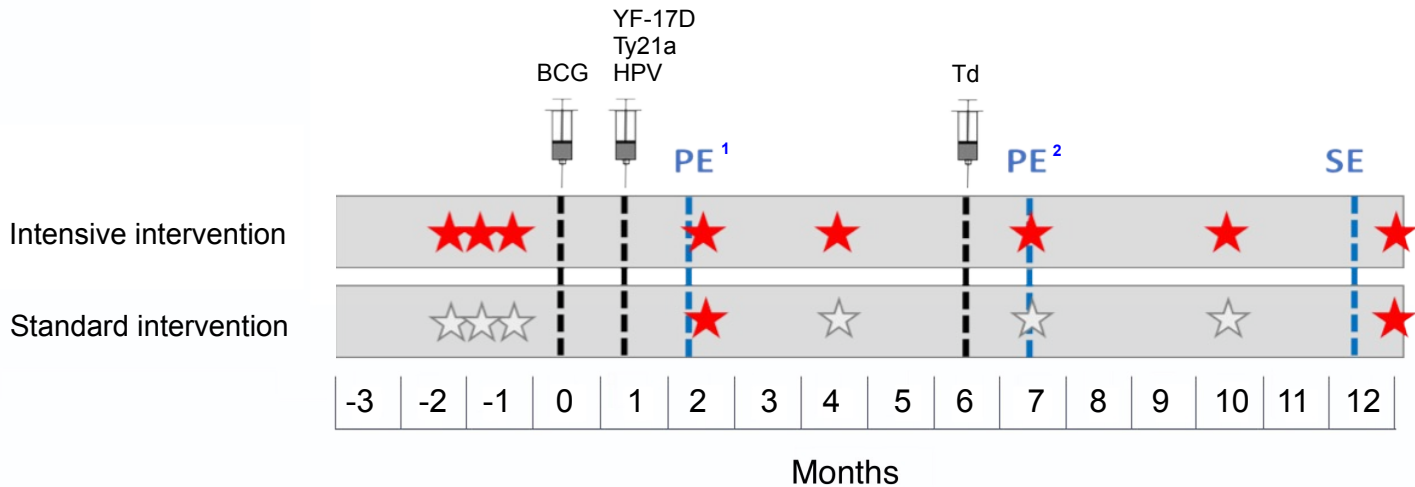

★ praziquantel; - - - immunisations; PE - - - primary endpoint; SE - - - secondary endpoint  
★ standard arm, no praziquantel



1  
2  
3 1 **SUPPLEMENTARY INFORMATION**  
4

5 2

6  
7 3 **The effect of intensive treatment for schistosomiasis on immune responses to vaccines among**  
8 **rural Ugandan island adolescents: randomised controlled trial protocol A for the ‘POPulation**  
9 **differences in VACCine responses’ (POPVAC) programme**  
10  
11

12  
13 6 Gyaviira Nkurunungi<sup>1,¶,\*</sup>, Ludoviko Zirimenya<sup>4,¶</sup>, Jacent Nassuuna<sup>4,¶</sup>, Agnes Natukunda<sup>1,¶</sup>, Prossy N  
14 7 Kabuubi<sup>1</sup>, Emmanuel Niwagaba<sup>1</sup>, Gloria Oduru<sup>1</sup>, Grace Kabami<sup>1</sup>, Rebecca Amongin<sup>1</sup>, Alex Mutebe<sup>1</sup>,  
15 8 Milly Namutebi<sup>1</sup>, Christopher Zziwa<sup>1</sup>, Susan Amongi<sup>1</sup>, Caroline Ninsiima<sup>1</sup>, Caroline Onen<sup>1</sup>, Florence  
16 9 Akello<sup>1</sup>, Moses Sewankambo<sup>1</sup>, Samuel Kiwanuka<sup>1</sup>, Robert Kizindo<sup>1</sup>, James Kaweesa<sup>2</sup>, Stephen Cose<sup>4,3</sup>,  
17 10 Emily L Webb<sup>4</sup>, Alison M Elliott<sup>1,3</sup> for the POPVAC trial team  
18  
19  
20  
21

22 11  
23  
24 12 <sup>1</sup>Immunomodulation and Vaccines Programme, Medical Research Council/Uganda Virus Research  
25 13 Institute and London School of Hygiene and Tropical Medicine (MRC/UVRI and LSHTM) Uganda  
26 14 Research Unit, Entebbe, Uganda  
27  
28

29 15 <sup>2</sup>Vector Control Division, Ministry of Health, Kampala, Uganda  
30

31  
32 16 <sup>3</sup>Department of Clinical Research, London School of Hygiene and Tropical Medicine, London, United  
33 17 Kingdom  
34

35  
36 18 <sup>4</sup>MRC Tropical Epidemiology Group, Department of Infectious Disease Epidemiology, London School  
37 19 of Hygiene and Tropical Medicine, London, United Kingdom  
38

39 20 <sup>¶</sup>These authors contributed equally  
40

41  
42 21 **\*Correspondence:** Gyaviira Nkurunungi; [Gyaviira.Nkurunungi@mrcuganda.org](mailto:Gyaviira.Nkurunungi@mrcuganda.org)  
43  
44  
45  
46  
47  
48  
49  
50  
51  
52  
53  
54  
55  
56  
57  
58  
59  
60

Table S1. Schedule of visits and procedures

| VISIT NUMBER                                                                                                                                  | 1               | 2 & 3                     | 4             | 5 <sup>9</sup> | 5.2             | 6                                    | 7       | 8             | 9                                       | 10      | 11                |
|-----------------------------------------------------------------------------------------------------------------------------------------------|-----------------|---------------------------|---------------|----------------|-----------------|--------------------------------------|---------|---------------|-----------------------------------------|---------|-------------------|
| WEEKS FROM 1 <sup>ST</sup> IMMUNISATION                                                                                                       | -8 <sup>1</sup> | -6 <sup>10</sup> , -4, -2 | 0             | 4              | 4 weeks +4 days | 8                                    | 20      | 28            | 32                                      | 44      | 52                |
|                                                                                                                                               | Screening       | Treatment (Rx) only       | Immunisations | Immunisations  |                 | Primary Endpoint (PE), Immunisations | Rx only | Immunisations | PE/Secondary Endpoint (SE) <sup>2</sup> | Rx only | SE, Immunisations |
| <b>RANDOMISED INTENSIVE VS STANDARD PRAZIQUANTEL INTERVENTION</b>                                                                             |                 |                           |               |                |                 |                                      |         |               |                                         |         |                   |
| PZQ intensive arm (x)                                                                                                                         |                 | x                         |               |                |                 | x <sup>3</sup>                       | x       |               | x <sup>3</sup>                          | x       | x <sup>3</sup>    |
| PZQ standard arm                                                                                                                              |                 |                           |               |                |                 | x <sup>3</sup>                       |         |               |                                         |         | x <sup>3</sup>    |
| Albendazole                                                                                                                                   |                 |                           |               |                |                 | x <sup>3</sup>                       |         |               | x <sup>3</sup>                          |         | x <sup>3</sup>    |
| <b>VACCINES</b>                                                                                                                               |                 |                           |               |                |                 |                                      |         |               |                                         |         |                   |
| BCG                                                                                                                                           |                 |                           | x             |                |                 |                                      |         |               |                                         |         |                   |
| YF-17D                                                                                                                                        |                 |                           |               | x              |                 |                                      |         |               |                                         |         |                   |
| Ty21a                                                                                                                                         |                 |                           |               | x              |                 |                                      |         |               |                                         |         |                   |
| HPV                                                                                                                                           |                 |                           |               | x              |                 | [x] <sup>4</sup>                     |         | x             |                                         |         |                   |
| Td                                                                                                                                            |                 |                           |               |                |                 |                                      |         | x             |                                         |         | [x] <sup>5</sup>  |
| <b>INVESTIGATIONS/PROCEDURES</b>                                                                                                              |                 |                           |               |                |                 |                                      |         |               |                                         |         |                   |
| Inclusion/exclusion criteria                                                                                                                  | x               |                           |               |                |                 |                                      |         |               |                                         |         |                   |
| Informed consent                                                                                                                              | x               |                           |               |                |                 |                                      |         |               |                                         |         |                   |
| Questionnaire                                                                                                                                 | x               |                           | x             | x              | x               | x                                    |         | x             | x                                       |         | x                 |
| Examination                                                                                                                                   | x               |                           | (x)           | (x)            | (x)             | (x)                                  |         | (x)           | (x)                                     |         | (x)               |
| Urine β-HCG test (female only) 1mL                                                                                                            | x               |                           | x             | x              |                 |                                      |         | x             |                                         |         |                   |
| Urine YF viral load                                                                                                                           |                 |                           |               |                | x               |                                      |         |               |                                         |         |                   |
| Stool for PCR and storage                                                                                                                     | x               |                           |               |                |                 |                                      |         | x             |                                         |         | x                 |
| Stool for coproantibody and storage                                                                                                           | x               |                           |               |                |                 | x                                    |         |               |                                         |         |                   |
| <b>BLOOD SAMPLES</b>                                                                                                                          |                 |                           |               |                |                 |                                      |         |               |                                         |         |                   |
| Malaria PCR (1ml)                                                                                                                             |                 |                           | x             | x              |                 |                                      |         | x             |                                         |         | x                 |
| Serology for HIV, prior malaria and <i>S. mansoni</i> (0.5ml)                                                                                 | x               |                           |               |                |                 |                                      |         |               |                                         |         |                   |
| Mansonella perstans (1ml)                                                                                                                     | x               |                           |               |                |                 |                                      |         |               |                                         |         |                   |
| Serum/plasma CAA (1ml)                                                                                                                        | x               |                           | x             | x              |                 | x                                    |         | x             | x                                       |         | x                 |
| Hb <sup>8</sup> / Full blood count (0.5ml)                                                                                                    | x               |                           | x             | x              |                 |                                      |         | x             |                                         |         |                   |
| Assessments of pre-immunisation responses, and/or vaccine response outcomes and/or exploratory immunology; storage <sup>7</sup> (10 – 20 mls) |                 |                           | x             | x              |                 | x                                    |         | x             | x                                       |         | x                 |
| Blood for gene expression (2mls)                                                                                                              |                 |                           | x             | x              |                 |                                      |         | x             |                                         |         |                   |
| Blood vol (mL)                                                                                                                                | 4               |                           | 27            | 17             |                 | 10-20                                |         | 27            | 10                                      |         | 14                |
| Cumulative blood vol (mL) <sup>7</sup>                                                                                                        | 4               |                           | 31            | 48             |                 | 68                                   |         | 95            | 105                                     |         | 119               |

**PE:** primary endpoint; **SE:** secondary endpoint; **Rx only:** treatment only

Immunisation days highlighted in green, primary end point days in red, days for treatment only in grey

(x) performed if clinically indicated

1. Screening and enrolment into Project A will take place about 8 weeks before immunisation 0 to allow initiation of the praziquantel intervention.
2. Week 32 is primary endpoint for responses to Td given at 28 weeks; secondary endpoint for HPV booster
3. Treatments given after sampling when schedules coincide
4. Week 8 HPV dose will be given for previously-unvaccinated girls aged  $\geq 14$  years
5. Week 52 Td booster dose will be provided as a service
6. Exploratory immunology blood volume will be guided by guidelines from Harvard Mass General, where a maximum of 3ml/kg body weight is taken at any one time point and not more than 3ml/kg is taken over any 8-week period (ref [http://www.drgreene.com/21\\_1616.html](http://www.drgreene.com/21_1616.html).) These guidelines have been followed in a previous study vaccinating adolescents with investigational tuberculosis vaccine MVA85A (in Uganda).<sup>1</sup> The total blood volume planned is 68 ml over the initial intensive sampling period of 8 weeks. Revision of sample volumes based on weight will only be required for participants who weigh less than 22 kg; the average weight of children aged 9 years is expected to be 28kg (with 21kg the 3rd centile) with greater weights for older children.<sup>2</sup>
7. At baseline, it will only be Hb estimation by Haemocue
8. Oral typhoid vaccine doses will be administered on three alternate days namely visit 5, 5.1 and 5.2.
9. The first PZQ treatment at week -6 will be administered at the end of the screening visit

22

### 23 **Further information on recruitment criteria**

- 24 • Participants who are excluded from the trial because they have been discovered (during  
25 screening procedures) to be suffering from a previously undiagnosed condition thought to  
26 require further medical attention will be referred appropriately for further investigation and  
27 treatment.
- 28 • Participants discovered to have severe anaemia will be excluded from the trial and treated  
29 for anaemia
- 30 • Participants discovered to be HIV-positive will be counselled and offered a CD4 T-cell count  
31 and referred to a provider of antiretroviral treatment (“Test and Treat” – i.e. initiation of  
32 treatment regardless of CD4 count is recommended for these high-risk communities).
- 33 • Participants discovered to be pregnant will be counselled and referred to an antenatal clinic  
34 of their choice.

35 This trial proposes to recruit all participants within a short time-frame. It will not, therefore, be  
36 possible to reconsider enrolment of potential participants with temporary exclusion criteria after  
37 treatment and resolution of the condition.

### 38 **Further rationale for the selection of vaccines**

#### 39 *Bacillus Calmette–Guérin (BCG)*

40 BCG is a live, replicating parenteral vaccine, and the only licensed vaccine against TB. The BCG  
41 vaccine for these studies will be obtained from the Serum Institute of India either directly, or  
42 through a supplier in Uganda. The Serum Institute of India provides much of the BCG vaccine used  
43 in Uganda.

44 Worldwide, TB is among the top 10 causes of death; Uganda has an estimated incidence of  
45 202/100,000 people.<sup>3</sup> Infectious, sputum positive, pulmonary TB classically emerges in adolescence,  
46 driving the on-going epidemic.<sup>4</sup> Thus adolescent booster immunisation is a key TB control strategy.<sup>5</sup>  
47 However, BCG vaccine response and efficacy are often impaired in tropical and rural settings<sup>6-8</sup> and  
48 new TB vaccines are similarly affected.<sup>9</sup> In the past, the WHO has been hesitant to recommend BCG  
49 re-vaccination. However, in 2017 WHO’s Strategic Advisory Group of Experts (SAGE) recommended:  
50 “Further research is warranted to explore whether certain sub-groups of age, geographic or *M.*  
51 *tuberculosis* exposure categories would benefit from re-vaccination.”<sup>10</sup> Recent results suggest that,  
52 despite the variability of BCG efficacy between populations, BCG vaccination in adolescence offers  
53 benefit in some tropical settings, especially for individuals who are not yet infected with  
54 *Mycobacterium tuberculosis*, and may also be cost-effective.<sup>7,11</sup> Also, BCG vaccine is currently being  
55 used among adolescents in South Africa as a comparator in a trial of a novel TB vaccine (trial

1  
2  
3 56 registration NCT02075203). BCG efficacy in Ugandan adolescents, and differences in BCG vaccine  
4  
5 57 responses between urban and rural Ugandan populations, have not been tested. Information  
6  
7 58 obtained from this study is expected to further inform the use of BCG in adolescents, and also to  
8  
9 59 inform the development of new vaccines for tuberculosis.

#### 10 60 *Yellow fever vaccine*

11  
12 61 Yellow fever vaccine YF-17D is a live replicating parenteral vaccine. The vaccine (Stamaril; Sanofi  
13  
14 62 Pasteur) is available for purchase in Uganda. Yellow Fever (YF) causes outbreaks in Uganda and the  
15  
16 63 wider region<sup>12</sup> and YF-17D is a candidate for Uganda's expanded programme on immunisation (EPI).  
17  
18 64 Lower vaccine replication, lower neutralising antibody induction, and greater waning, are described  
19  
20 65 in Uganda compared to Switzerland.<sup>13</sup> YF-17D is a potential vector for novel vaccine constructs,<sup>14</sup>  
21  
22 66 adding relevance to vaccine development.

#### 23 67 *Typhoid vaccine Ty21a*

24  
25 68 Typhoid vaccine Ty21a is a live replicating oral vaccine and also a potential vector for new vaccine  
26  
27 69 constructs.<sup>15</sup> The Ty21a vaccine will be purchased from PaxVax, Redwood City, California.  
28  
29 70 Substantial, multi-year typhoid outbreaks occur in Uganda and immunisation campaigns have been  
30  
31 71 advocated as cost effective.<sup>16</sup> Schistosomiasis has been associated with prolonged *S. typhi* infection<sup>17</sup>  
32  
33 72 and impaired antibody responses to killed typhoid vaccines.<sup>18</sup>

34  
35 73 Ty21a was developed in the 1970s. Although not routinely used in Uganda, it has been (and is  
36  
37 74 currently) registered in many countries. It was first registered in the United States and United  
38  
39 75 Kingdom in the 1980s, and is recommended by the WHO for both endemic and epidemic settings.<sup>19</sup>  
40  
41 76 It has comparable efficacy to the parenteral Vi polysaccharide typhoid vaccine, good durability and  
42  
43 77 minimal adverse effects.<sup>19</sup> It is proposed for use in this study to model effects of study exposures  
44  
45 78 and intervention on the response to a live oral vaccine.

46  
47 79 The Ty21a vaccine is given as a three-dose regimen on alternate days.

#### 48 80 *Human Papilloma Virus (HPV) vaccine*

49  
50 81 The Human Papilloma Virus (HPV) vaccine is a protein virus-like particle. The quadrivalent HPV  
51  
52 82 Vaccine Gardasil (Merck) is available for purchase in Uganda and is the vaccine used by the national  
53  
54 83 EPI programme. Studies after three vaccine doses have found somewhat enhanced responses in the  
55  
56 84 presence of malaria, but no effect of helminths.<sup>20</sup> No study has previously investigated parasite  
57  
58 85 effects on the priming response, but recent results for tetanus suggest that priming may be more  
59  
60 86 susceptible than boosting to adverse effects.<sup>21</sup> This will be important if forthcoming trials support  
87  
88 89 single-dose HPV immunisation (NCT02834637). HPV immunisation is being rolled out among girls to

1  
2  
3 88 prevent cervical neoplasia, the most common cancer among Ugandan women and we will  
4  
5 89 coordinate provision with the national HPV immunisation programme.<sup>22</sup> HPV immunisation is also  
6  
7 90 beneficial for boys since HPV infection is associated with anogenital warts, anal cancer and  
8  
9 91 oropharyngeal cancers in both males and females, and with penile cancer in men,<sup>23</sup> and we will  
10  
11 92 include boys in these studies.

### 12 93 *Tetanus and diphtheria vaccines*

14 94 Tetanus and diphtheria (Td) vaccines comprise inert toxoids. Schistosomiasis is associated with a Th2  
15  
16 95 biased response to tetanus toxoid<sup>24</sup> and with suppressed antibody responses among those with low  
17  
18 96 pre-immunisation antibody levels.<sup>21</sup> Booster immunisation is recommended for young women to  
19  
20 97 prevent maternal and neonatal tetanus. Recent evidence emphasises the need to protect young  
21  
22 98 men also.<sup>25</sup>

### 23 99 ***Immunisation Postponement Criteria***

25 100 If any one of the following is identified at the time scheduled for immunisation, the participant may  
26  
27 101 be immunised at a later date, or withdrawn, at the discretion of the Investigator. The participant  
28  
29 102 must be followed until resolution of the event as with any adverse event:

- 31 103 • Acute disease at the time of immunisation. Acute disease is defined as the presence of a  
32  
33 104 moderate or severe illness with or without fever. All vaccines can be administered to persons  
34  
35 105 with a minor illness such as diarrhoea or mild upper respiratory infection with or without low-  
36  
37 106 grade fever, i.e. temperature of  $\leq 37.5^{\circ}\text{C}$  ( $99.5^{\circ}\text{F}$ )
- 38 107 • Temperature of  $>37.5^{\circ}\text{C}$  ( $99.5^{\circ}\text{F}$ ) at the time of immunisation
- 40 108 • Taking antibiotics or antimalarials currently, or within the past 7 days, of the date of Ty21a  
41  
42 109 administration (ascertained verbally)

### 44 110 ***Vaccine storage and transport***

46 111 In order to maintain a reliable vaccine cold chain, the vaccines and diluents to be used will be stored  
47  
48 112 and transported within the recommended temperature range of  $+2^{\circ}\text{C}$  to  $+8^{\circ}\text{C}$ . Care will be taken to  
49  
50 113 ensure that the vaccines are not frozen. BCG, being sensitive to light, will be kept in the dark  
51  
52 114 (normally within its secondary packaging) for as long as possible to protect it during storage and  
53  
54 115 transportation. All vaccines will be kept in appropriate refrigeration equipment with a temperature  
55  
56 116 monitoring device to ensure temperatures remain between  $+2^{\circ}\text{C}$  and  $+8^{\circ}\text{C}$ . Cold boxes/vaccines  
57  
58 117 carriers with temperature monitors will be used to transport vaccines and the diluents from the  
59  
60 118 MRC/UVRI and LSHTM Uganda Research Unit (Entebbe) to Koome island and while transporting  
60 119 vaccines to immunisation sessions. Designated staff will be given responsibility for managing the

1  
2  
3 120 vaccine cold chain. All cold chain equipment including the temperature monitoring devices used for  
4  
5 121 this project will comply with relevant technical specifications as defined by the EPI standards. Basic  
6  
7 122 routine maintenance will be regularly carried out on all cold chain equipment.

### 8 9 123 ***Additional laboratory measurements***

10  
11 124 Additional assays will comprise HIV serology, pregnancy testing and full blood counts. HIV testing  
12  
13 125 and pregnancy testing will be accompanied by appropriate counselling by trained staff.

- 14  
15 126 • HIV serology will be done on blood samples using rapid tests and according to prevailing  
16  
17 127 national algorithms.<sup>26</sup> This will be done at baseline.
- 18  
19 128 • Pregnancy testing will be done using urine samples and standard operating procedures for  
20  
21 129 assessment of urine  $\beta$ -human chorionic gonadotropin ( $\beta$ hCG). This will be done at baseline  
22  
23 130 and before immunisation on each immunisation day.
- 24  
25 131 • Full blood counts will be conducted using a haematology analyser. Mild, moderate and  
26  
27 132 severe anaemia will be defined according to WHO guidelines, by age.<sup>27</sup> This will be done at  
28  
29 133 baseline to test for anaemia as part of the eligibility assessment, and pre-immunisation as  
30  
31 134 part of the assessment of immunological profile.

32  
33 135 Individuals found to be HIV positive or pregnant will be referred to appropriate providers for further  
34  
35 136 care. Individuals with severe anaemia (haemoglobin  $<82\text{g/L}$ ) will be excluded from the randomised  
36  
37 137 intervention (since the intervention might be beneficial in management of anaemia). They will be  
38  
39 138 treated for anaemia.

### 40 41 139 ***Sample handling and archive***

42  
43 140 Blood and other samples will be processed according to local laboratory standard operating  
44  
45 141 procedures (SOPs). All samples will reach the laboratory in anonymised form.

46  
47 142 A sample archive will be developed. Although our current programme of work will address specific  
48  
49 143 hypotheses regarding pathways of effects of parasites and interventions, the sample archive will  
50  
51 144 provide a major asset for exploration of new leads arising from this work, or for an alternative,  
52  
53 145 “systems biology” approach employing (for example) proteomic, genomic, epigenetic and  
54  
55 146 transcriptomic analyses, and investigating the microbiome and virome. Information provided to  
56  
57 147 participants, and consent forms, will include considerations of sample storage, and the possibility of  
58  
59 148 sample analysis in laboratories within and outside Uganda. Participants will be able to decide if they  
60  
149 will permit such future use of any leftover samples. We plan to store the samples for up to 20 years.  
150  
151 If further storage is needed after that time, permission will be requested from the Uganda Virus  
Research Institute and London School of Hygiene and Tropical Medicine ethical review committees.

1  
2  
3 152 If they elect not to permit this, all of those leftover samples will be discarded after the completion of  
4  
5 153 the work included in the current protocol.

6  
7 154 ***Operational considerations***

8  
9 155 *Programme governance*

10  
11 156 A Programme Steering Committee has been set up to guide progress across all projects. This  
12  
13 157 comprises the following:

- 14  
15 158 • An independent chair  
16  
17 159 • Representatives from the Ministry of Health programmes for immunisation and for vector  
18  
19 160 borne disease control  
20  
21 161 • Representatives of district authorities (Mukono and Jinja districts)  
22  
23 162 • Community representatives  
24  
25 163 • Principal investigator and co-investigators  
26  
27 164 • Project leader and post-doctoral immunologist  
28  
29 165 • Trial statistician  
30  
31 166 • Laboratory manager  
32  
33 167 • Medical Research Council observer

34  
35 168 *Informed consent*

36  
37 169 Both written informed assent from the participants and written informed consent from a parent or  
38  
39 170 guardian will be required for participation, although these may not necessarily be obtained at the  
40  
41 171 same time. Information will be provided in both English and the appropriate local language. For  
42  
43 172 individuals who cannot speak the languages used, or who cannot read or write, a witness who can  
44  
45 173 read the information sheet and translate the information to the participant or parent/guardian will  
46  
47 174 be used. Two different types of age specific assent forms will be used for the group of participants  
48  
49 175 aged 9 – 12 years and for the group aged 13 – 17 years. Informed consent by emancipated or mature  
50  
51 176 minors will be obtained using a designated consent form for these categories of participants.

52  
53 177 The aims of the study, all tests, treatments and immunisations to be carried out and potential risks  
54  
55 178 will be explained. The participant will be given the opportunity to ask about details of the trial, and  
56  
57 179 will then have time to consider whether or not to participate. If they do decide to participate, they  
58  
59 180 and their parent/guardian will sign and date two copies of the assent and consent forms, one for  
60  
181 them to take away and keep, and one to be stored securely by the research team. Separate  
182 information and consent forms will be provided (i) for consent for storage of samples for future



183 studies and for anonymous sharing of data from this study and (ii) for possible genetic studies; the  
184 information sheet will explain that these data may be used in analyses related to this protocol.

#### 185 *Screening and Eligibility Assessment*

186 Once the informed consent process has been completed, and consent (and assent) given, a baseline  
187 medical history (including concomitant medication) will be collected. Vital signs will be checked and  
188 a physical examination will be performed. Inclusion and exclusion criteria will be checked.

189 Participants will undergo pre- and post-test counselling for HIV and (for girls) pregnancy testing by a  
190 trained and experienced nurse- or clinician-counsellor. Blood, urine and stool samples will be  
191 obtained, for tests as specified in the schedule of procedures. These tests are to exclude the major,  
192 immunomodulating co-infection, HIV, and conditions that might impact safety (anaemia,  
193 pregnancy).

#### 194 *Enrolment*

195 Participants who consent/assent, complete the screening processes, satisfy all the inclusion criteria  
196 and meet none of the exclusion criteria will be enrolled.

#### 197 *Discontinuation/withdrawal criteria*

198 In accordance with the principles of the current revision of the Declaration of Helsinki and any other  
199 applicable regulations, a participant has the right to withdraw from the study at any time and for any  
200 reason, and is not obliged to give his or her reasons for doing so. The Investigator may withdraw the  
201 participant at any time in the interests of the participant's health and well-being. In addition, the  
202 participant may withdraw/be withdrawn for any of the following reasons:

- 203 • Ineligibility (either arising during the study or retrospectively, having been overlooked at  
204 screening)
- 205 • Administrative decision by the Investigator
- 206 • Significant protocol deviation
- 207 • Participant non-compliance with study requirements
- 208 • An adverse event which requires discontinuation of the study involvement or results in  
209 inability to continue to comply with study procedures.

210 Any participant who becomes pregnant during the trial will be followed up until the end of the  
211 pregnancy but no further immunisations will be given unless indicated during pregnancy (as is the  
212 case for tetanus toxoid). The trial allocation for this participant will be unblinded and the participant  
213 will only be given further treatment if clinically indicated. The babies will also be followed up and

1  
2  
3 214 examined for any adverse effects. We will not routinely perform venepuncture in a pregnant  
4  
5 215 participant.

6  
7 216 The reason for withdrawal will be recorded in the case report form (CRF). If withdrawal is due to an  
8  
9 217 AE, appropriate follow-up visits or medical care will be arranged, with the agreement of the  
10  
11 218 participant, until the AE has resolved, stabilised or a non-trial related causality has been assigned.

12  
13 219 If a participant withdraws from the study samples collected before their withdrawal from the trial  
14  
15 220 will be used/ stored unless the participant specifically requests otherwise.

16 221 *Trial discontinuation*

17  
18 222 The trial will be discontinued in the event of new scientific information that renders continuation  
19  
20 223 futile or unethical, or for any other reason, at the discretion of the Programme Steering Committee.

21  
22 224 *End of study definition*

23  
24 225 The trial will be completed when the last participant enrolled into the trial has completed their final  
25  
26 226 follow up visit.

27  
28 227 *Safety assessments and oversight*

29  
30 228 No new investigational drug or product will be used in the proposed trial. However, standard  
31  
32 229 approaches for monitoring safety and reporting of serious adverse events will be followed.

33  
34 230 *Monitoring*

35  
36 231 The trial will be monitored by both internal and external monitors according to a pre-defined  
37  
38 232 monitoring plan which will include a site initiation visit, monitoring visits at least annually, and a  
39  
40 233 close-out visit. The monitors will assess patient safety, data integrity, and adherence to the protocol  
41  
42 234 and to Good Clinical Research Practice procedures.

43  
44 235 ***Considerations regarding standard of care***

45  
46 236 *S. mansoni* infection status will be determined retrospectively through assays conducted in bulk on  
47  
48 237 stored samples (plasma CAA). These results will not, therefore, be useful to determine management  
49  
50 238 of individual participants.

51 239 Participants in the standard treatment arm will receive lower levels of anthelmintic treatment.

52  
53 240 However, all trial arms will receive a minimum of well-implemented national standard of care.

54  
55 241 Standard of care will comprise annual praziquantel treatment. Our own results from the Lake

56  
57 242 Victoria Island Intervention Study on Worms and Allergy-related diseases (LaVIISWA),<sup>28</sup> which

58  
59 243 compared annual versus quarterly intervention for schistosomiasis at community level over three  
60

1  
2  
3 244 years, showed no advantage of quarterly treatment for morbidity outcomes attributed to  
4  
5 245 schistosomiasis.

6  
7 246 Schistosomiasis can cause anaemia. To manage the expected differential benefits of the  
8  
9 247 interventions for anaemia, a full blood count will be performed at baseline, as discussed above;  
10  
11 248 anaemic children will be managed appropriately and severely anaemic children excluded.  
12  
13 249 Albendazole will be provided twice a year to manage nematode infections (after collection of  
14  
15 250 primary and secondary endpoint samples).

16 251 ***Procedures to be followed in the event of abnormal findings***

17  
18 252 Abnormal clinical findings from medical history, examination or blood tests will be assessed as to  
19  
20 253 their clinical significance throughout the trials. If an abnormal test result is deemed clinically  
21  
22 254 significant, it may be repeated. If a test remains clinically significant, the participant will be informed  
23  
24 255 and appropriate medical care arranged as appropriate and with the permission of the participant.  
25  
26 256 Specific details regarding findings, discussion with participants and resulting actions will be recorded  
27  
28 257 in the clinical records. Decisions to exclude the participant from enrolling in the trial or to withdraw  
29  
30 258 a participant from the trial will be at the discretion of the Investigator.

31 259 ***Data and Safety Monitoring Board (DSMB)***

32  
33 260 A data and safety monitoring board (DSMB) has been appointed to provide real-time safety  
34  
35 261 oversight. The DSMB will be notified within 7 days of the Investigators' being aware of the  
36  
37 262 occurrence of SAEs. The DSMB may recommend the Investigators to place the trial on hold if  
38  
39 263 deemed necessary following an intervention-related SAE. The DSMB will be chaired by a clinician  
40  
41 264 experienced in clinical trials. There will be a minimum of two other appropriately qualified  
42  
43 265 committee members. In the case of events related to a blinded intervention, the DSMB can request  
44  
45 266 unblinding. Membership will include a statistician, and at least one Ugandan member. All  
46  
47 267 correspondence between Investigators and the DSMB will be conveyed by the Principal Investigator  
48  
49 268 to the trial Sponsor. The Chair of the DSMB will be contacted for advice and independent review by  
50  
51 269 the Investigator or trial Sponsor in the following situations:

- 52  
53  
54  
55  
56  
57  
58  
59  
60
- 270 • The occurrence of any SAE
  - 271 • Any other situation where the Investigator or trial Sponsor feels independent advice or  
272 review is important

273 ***Ethical and regulatory considerations***

274 *Further information regarding risks*

1  
2  
3 275 The immunisations to be given have recognised side effects which are usually mild and resolve  
4  
5 276 spontaneously in a few days to one week. Parenteral vaccines are likely to result in pain and  
6  
7 277 swelling at the site of injection and mild fever; very occasionally pain and swelling can be severe and  
8  
9 278 associated with difficulty in moving the shoulder. Sometimes headache and tiredness occur. Rarely  
10  
11 279 a vaccine may cause a severe allergic reaction. For most vaccines this is estimated at less than one  
12  
13 280 in a million doses (but 1 in 55,000 for Yellow Fever vaccine).<sup>29</sup> Individuals with a history of a  
14  
15 281 possible allergic reaction to drugs or vaccines, or to vaccine components including eggs or chicken  
16  
17 282 proteins, will be excluded from the studies. The research team will be trained and prepared to  
18  
19 283 manage severe allergic reactions.

20  
21 284 Adverse reactions to Yellow Fever vaccine include severe nervous system reaction (about 1 person in  
22  
23 285 125,000) and severe, life-threatening illness with organ failure (about 1 person in 250,000). The  
24  
25 286 mortality for this severe, life-threatening adverse effect is reported as about 50%.<sup>29</sup>

26  
27 287 BCG immunisation is likely to induce a scar in many cases. This may develop over several weeks,  
28  
29 288 starting as a small papule at the injection site which may become ulcerated and then heal over a  
30  
31 289 period of 2 to 5 months; and lymphadenopathy may develop. Occasionally a more severe local  
32  
33 290 reaction occurs (estimated at 1 per 1,000-10,000 doses): for example, an abscess develops and scars  
34  
35 291 may develop into keloids. Rarely BCG can cause disseminated disease (1 per 230,000 to 640,000  
36  
37 292 doses), or disease in sites remote from the immunisation site. Disseminated BCG disease usually  
38  
39 293 occurs in immunocompromised people: HIV positive people will be excluded from these studies.<sup>30</sup>  
40  
41 294 BCG "pre-immunisation" may interfere with the response to the subsequent live vaccines; indeed  
42  
43 295 our hypothesis, and published results, suggest that it may suppress replication of YF 17D vaccine.<sup>31</sup>  
44  
45 296 However, this reduced replication has not been shown to correlate with, or result in, reduced levels  
46  
47 297 of neutralising antibody titres (which are the desired protective outcome).<sup>13 31</sup>

48  
49 298 Oral typhoid vaccine (Ty21a) may occasionally be associated with stomach pain, nausea, vomiting  
50  
51 299 and (rarely) rash.<sup>29</sup>

52  
53 300 Praziquantel has been in use for about 30 years. It has a well-recognised profile of side effects  
54  
55 301 including dizziness, nausea, vomiting, abdominal pain, diarrhoea (sometimes with blood) and  
56  
57 302 urticarial rash. The symptoms are considered to arise largely from the effects of killing worms and to  
58  
59 303 be more severe in people with heavy infections. Symptoms are better tolerated when the drugs are  
60  
304 given after food and we will provide treatment after a meal or snack. Simple medications, such as  
305 paracetamol and cetirizine, can alleviate symptoms and these will be available on treatment days.

306 **References**

- 1  
2  
3  
4  
5  
6 307 1. Wajja A, Kizito D, Nassanga B, et al. The effect of current *Schistosoma mansoni* infection on the  
7 308 immunogenicity of a candidate TB vaccine, MVA85A, in BCG-vaccinated adolescents: An open-label trial.  
8 309 *PLoS neglected tropical diseases* 2017;11(5):e0005440. doi: 10.1371/journal.pntd.0005440 [published Online  
9 310 First: 2017/05/05]
- 10  
11 311 2. WHO. Growth reference 5-19 years. 2007
- 12  
13 312 3. WHO. Global tuberculosis report 2016 [http://www.who.int/tb/publications/global\\_report/en/](http://www.who.int/tb/publications/global_report/en/) (accessed 17  
14 313 June 2017), 2016.
- 15  
16 314 4. Alcais A, Fieschi C, Abel L, et al. Tuberculosis in children and adults: two distinct genetic diseases. *J Exp Med*  
17 315 2005;202(12):1617-21. doi: 10.1084/jem.20052302
- 18  
19 316 5. Weiner J, 3rd, Kaufmann SH. Recent advances towards tuberculosis control: vaccines and biomarkers. *J*  
20 317 *Intern Med* 2014;275(5):467-80. doi: 10.1111/joim.12212
- 21  
22 318 6. Fine PE. Variation in protection by BCG: implications of and for heterologous immunity. *Lancet (London,*  
23 319 *England)* 1995;346(8986):1339-45.
- 24  
25 320 7. Barreto ML, Pilger D, Pereira SM, et al. Causes of variation in BCG vaccine efficacy: examining evidence from  
26 321 the BCG REVAC cluster randomized trial to explore the masking and the blocking hypotheses. *Vaccine*  
27 322 2014;32(30):3759-64. doi: 10.1016/j.vaccine.2014.05.042
- 28  
29 323 8. Black GF, Weir RE, Floyd S, et al. BCG-induced increase in interferon-gamma response to mycobacterial  
30 324 antigens and efficacy of BCG vaccination in Malawi and the UK: two randomised controlled studies. *Lancet*  
31 325 *(London, England)* 2002;359(9315):1393-401. doi: 10.1016/S0140-6736(02)08353-8
- 32  
33 326 9. Tanner R, Kakalacheva K, Miller E, et al. Serum indoleamine 2,3-dioxygenase activity is associated with  
34 327 reduced immunogenicity following vaccination with MVA85A. *BMC infectious diseases* 2014;14:660. doi:  
35 328 10.1186/s12879-014-0660-7 [published Online First: 2014/12/04]
- 36  
37 329 10. WHO. SAGE Evidence to recommendations framework. 2017.  
38 330 [http://www.who.int/immunization/sage/meetings/2017/october/2](http://www.who.int/immunization/sage/meetings/2017/october/2_EvidencetoRecommendationFramework_BCG.pdf) [EvidencetoRecommendationFramework](http://www.who.int/immunization/sage/meetings/2017/october/2_EvidencetoRecommendationFramework_BCG.pdf)  
39 331 [\\_BCG.pdf](http://www.who.int/immunization/sage/meetings/2017/october/2_EvidencetoRecommendationFramework_BCG.pdf) (accessed 16th March 2018).
- 40  
41 332 11. Dye C. Making wider use of the world's most widely used vaccine: Bacille Calmette-Guerin revaccination  
42 333 reconsidered. *Journal of the Royal Society, Interface* 2013;10(87):20130365. doi: 10.1098/rsif.2013.0365  
43 334 [published Online First: 2013/08/02]
- 44  
45 335 12. Kraemer MU, Faria NR, Reiner RC, Jr., et al. Spread of yellow fever virus outbreak in Angola and the  
46 336 Democratic Republic of the Congo 2015-16: a modelling study. *The Lancet Infectious diseases* 2016 doi:  
47 337 10.1016/s1473-3099(16)30513-8 [published Online First: 2016/12/27]
- 48  
49 338 13. Muyanja E, Ssemaganda A, Ngauv P, et al. Immune activation alters cellular and humoral responses to  
50 339 yellow fever 17D vaccine. *The Journal of clinical investigation* 2014;124(7):3147-58. doi: 10.1172/jci75429  
51 340 [published Online First: 2014/06/10]
- 52  
53 341 14. Aguiar M, Stollenwerk N, Halstead SB. The Impact of the Newly Licensed Dengue Vaccine in Endemic  
54 342 Countries. *PLoS neglected tropical diseases* 2016;10(12):e0005179. doi: 10.1371/journal.pntd.0005179  
55 343 [published Online First: 2016/12/22]
- 56  
57 344 15. Dharmasena MN, Osorio M, Filipova S, et al. Stable expression of *Shigella dysenteriae* serotype 1 O-antigen  
58 345 genes integrated into the chromosome of live *Salmonella* oral vaccine vector Ty21a. *Pathogens and disease*  
59 346 2016 doi: 10.1093/femspd/ftw098 [published Online First: 2016/09/23]

- 1  
2  
3 347 16. Carias C, Walters MS, Wefula E, et al. Economic evaluation of typhoid vaccination in a prolonged typhoid  
4 348 outbreak setting: the case of Kasese district in Uganda. *Vaccine* 2015;33(17):2079-85. doi:  
5 349 10.1016/j.vaccine.2015.02.027 [published Online First: 2015/02/26]  
6  
7 350 17. Melhem RF, LoVerde PT. Mechanism of interaction of Salmonella and Schistosoma species. *Infection and*  
8 351 *immunity* 1984;44(2):274-81. [published Online First: 1984/05/01]  
9  
10 352 18. Muniz-Junqueira MI, Tavares-Neto J, Prata A, et al. Antibody response to Salmonella typhi in human  
11 353 schistosomiasis mansoni. *Revista da Sociedade Brasileira de Medicina Tropical* 1996;29(5):441-5. [published  
12 354 Online First: 1996/09/01]  
13  
14 355 19. WHO. Position Paper on Typhoid vaccines: WHO position paper – March 2018 2018  
15  
16 356 20. Brown J, Baisley K, Kavishe B, et al. Impact of malaria and helminth infections on immunogenicity of the  
17 357 human papillomavirus-16/18 AS04-adjuvanted vaccine in Tanzania. *Vaccine* 2014;32(5):611-7. doi:  
18 358 10.1016/j.vaccine.2013.11.061  
19  
20 359 21. Riner DK, Ndombi EM, Carter JM, et al. Schistosoma mansoni Infection Can Jeopardize the Duration of  
21 360 Protective Levels of Antibody Responses to Immunizations against Hepatitis B and Tetanus Toxoid. *PLoS*  
22 361 *neglected tropical diseases* 2016;10(12):e0005180. doi: 10.1371/journal.pntd.0005180  
23  
24 362 22. Centre HI. HPV and related diseases report: Uganda. 2016.  
25 363 <http://www.hpvcnre.net/statistics/reports/UGA.pdf> (accessed 20.01.2017).  
26  
27 364 23. WHO. Human papillomavirus vaccines: WHO position paper, May 2017. *Releve epidemiologique*  
28 365 *hebdomadaire* 2017;92(19):241-68. [published Online First: 2017/05/23]  
29  
30 366 24. Sabin EA, Araujo MI, Carvalho EM, et al. Impairment of tetanus toxoid-specific Th1-like immune responses  
31 367 in humans infected with Schistosoma mansoni. *The Journal of infectious diseases* 1996;173(1):269-72.  
32 368 [published Online First: 1996/01/01]  
33  
34 369 25. Nanteza B, Galukande M, Aceng J, et al. The burden of tetanus in Uganda. *SpringerPlus* 2016;5(1):705. doi:  
35 370 10.1186/s40064-016-2309-z [published Online First: 2016/06/29]  
36  
37 371 26. Ministry of Health–Uganda. Uganda Clinical Guidelines 2016.  
38 372 <http://apps.who.int/medicinedocs/documents/s23532en/s23532en.pdf>  
39  
40 373 27. WHO. Haemoglobin concentrations for the diagnosis of anaemia and assessment of severity. Vitamin and  
41 374 Mineral Nutrition Information System. Geneva, World Health Organization, 2011  
42 375 (WHO/NMH/NHD/MNM/11.1).  
43  
44 376 28. Sanya RE, Nkurunungi G, Hoek Spaans R, et al. The Impact of Intensive Versus Standard Anthelmintic  
45 377 Treatment on Allergy-related Outcomes, Helminth Infection Intensity, and Helminth-related Morbidity in  
46 378 Lake Victoria Fishing Communities, Uganda: Results From the LaVIISWA Cluster-randomized Trial. *Clinical*  
47 379 *Infectious Diseases* 2018:ciy761-ciye61. doi: 10.1093/cid/ciy761  
48  
49 380 29. CDC. Centers for Disease Control and Prevention, vaccines and immunizations.  
50  
51 381 30. WHO. Information sheet observed rate of vaccine reactions Bacille Calmette-Guérin (BCG) vaccine. 2012  
52  
53 382 31. Arts RJW, Moorlag S, Novakovic B, et al. BCG Vaccination Protects against Experimental Viral Infection in  
54 383 Humans through the Induction of Cytokines Associated with Trained Immunity. *Cell host & microbe*  
55 384 2018;23(1):89-100.e5. doi: 10.1016/j.chom.2017.12.010 [published Online First: 2018/01/13]  
56 385  
57  
58  
59  
60



## MRC/UVRI and LSHTM Uganda Research Unit

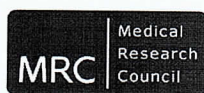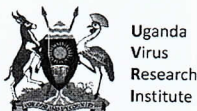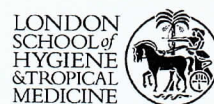

**Population differences in vaccine responses: the effect of intensive treatment for schistosomiasis on response to vaccines among island adolescents**

**Short Title: POPVAC Project A**

**Information Sheet for participants 9 – 12 years**

**1. Why are we meeting with you?**

We are inviting you to take part in a research which is being done by a team from Uganda Virus Research Institute (UVRI), working together with colleagues from the London School of Hygiene and Tropical Medicine, UK. We are meeting you because you are aged between 9 and 12 years and study in a primary school on Koome island. After we tell you about it, we will ask if you'd like to be in this study or not. Only If you agree to take part, will you sign the assent form to show us that you are happy to do so.

The people leading this research study are Professor Alison Elliott and Dr Ludoviko Zirimenya.

**2. Why are we doing this research?**

We want to **find out whether treating Bilharzia much more frequently (a total of 7 times in a year) can get rid of it completely and whether this will improve vaccine responses.**

In the whole study, there will be about 480 children from schools of Koome islands.

**3. What is going to happen in this research study?**

Only if you agree, a full health check-up that will involve taking stool, urine and blood samples will be done. If everything is okay, the following will be done:

You will be put into one of the two **Bilharzia treatment** groups by chance

- One group will be treated for Bilharzia using praziquantel (the recommended medicine for Bilharzia) seven times in the year, and an eighth time after the end of the study.
- The other group will be treated for Bilharzia using praziquantel once in the year, and a second time after the end of the study.

You will be immunised with **five (5) vaccines.** These are:

- BCG vaccine. This is intended to protect against tuberculosis.
- Yellow fever vaccine. This protects against Yellow Fever an infection carried by mosquitoes.
- HPV vaccine. Human Papilloma Virus (HPV) causes growths in private parts and cancer in girls and boys.
- Tetanus and diphtheria vaccines. Tetanus and diphtheria are bacterial infections that cause very serious disease.
- Typhoid vaccine. Typhoid is a serious form of fever which is spread through contaminated food.

These immunisations will be given on different times during the entire duration of the study.

POPVAC Project A, assent age 9-12 years v1.3, 1<sup>st</sup> July 2019 | Page 1 of 5

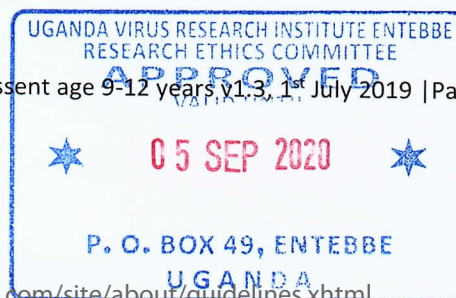



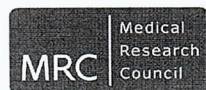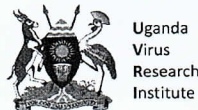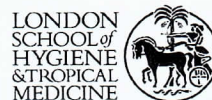

Most of the vaccines will be injected into your upper arm (either right or left side). The typhoid vaccine is an oral vaccine: it is in the form of capsules which are swallowed. You will be given one capsule per day for three alternating days.

#### You will be asked to give **blood samples**

We will ask you to give blood samples before and after you are given the vaccines. The amount of blood that we will take at each visit is completely safe and will vary between 4 and 27 millilitres (1 teaspoon and 5 and a half teaspoons) at the different visits.

#### You will be asked to give **stool and urine samples**

At some visits we will ask you for additional stool and urine samples for testing to check whether the worm infections have responded to treatment or (for girls) whether you have become pregnant.

#### Some of you will be asked to take part in a special **sugar test** of absorption from the intestines

We think that worm infections may make our intestines a little bit leaky, and this might explain some of their effects. We can test this using a special sugar drink. We will ask about 200 people to do this additional test. If you are asked to do this, it will be done about 8 weeks after your first vaccine is given. You will be asked not to eat overnight or in the morning of the test day. Then you will be given a special drink that contains sugars early in the morning. Afterwards you will also be asked to drink a litre of water (equal to two Rwenzori bottles) over the following few hours. All the urine that you pass during the next five hours will be collected. The volume (amount) of urine will be measured and the amount of sugar in it will be tested, to find out how much of the sugar your body has absorbed.

#### **4. What will the blood, stool and urine samples be used for?**

The samples will be used to test for infections, including HIV, malaria and worms, to test for anaemia (the strength of your blood) and to test for pregnancy (among girls). The blood samples will also be used to test how your body responds to vaccines. For some participants, the sugar test will be used to test absorption from the intestines.

#### **5. Will taking part in this study harm me?**

We do not expect this to harm you, though you will experience the following:

- You will need to take time off classes during each visit by the study team.
- Taking blood samples is not expected to cause any problem for you, apart from the discomfort or pain, bruising or bleeding, redness at the place where the needle goes into the skin, but this will go away in a few days.
- During the sugar test, you will be asked not to eat overnight and during the morning of the test so you may get hungry (although water and a snack will be provided). This may make you feel a little sick and stools may become a bit loose.
- If you are a girl, even if you know you could not be pregnant, we will do a pregnancy test. We have to be quite sure. You must as well promise that you can avoid getting pregnant while taking part in this study.

POPVAC Project A - assent age 9-12 years v1.3, 1<sup>st</sup> July 2019 | Page 2 of 5

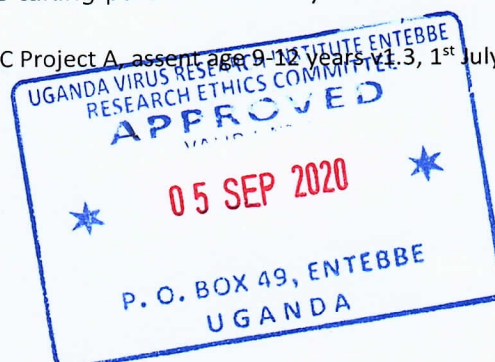



## MRC/UVRI and LSHTM Uganda Research Unit

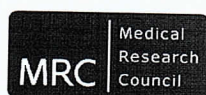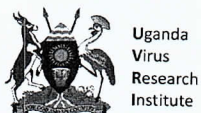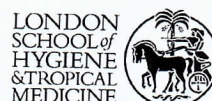

- Treatment of Bilharzia with praziquantel may make you feel dizzy or sick, give you abdominal pain or diarrhoea, or occasionally cause an itchy rash. The research team will have medicines available to help you if you have a strong reaction to the treatment.
- All the study vaccines are known to be safe. However, even approved vaccines may very occasionally cause a serious reaction, such as an allergic reaction. The research doctors and nurses will be available to help if this happens.

### 6. Will the study help me?

The treatment for Bilharzia is likely to be good for you, whichever group you are put in. The vaccines are likely to help you by protecting you from infectious diseases. The research results may help all people in the world, because in the end we may get a better understanding whether treating Bilharzia much more frequently (a total of 7 times in a year) can get rid of it completely and whether this will improve vaccine responses.

### 7. What is the cost of taking part in the trial?

There is no cost to participate in this trial. You will receive a soft drink and the gift of a pen or other simple school material on days when blood samples are drawn, and the gift of a T-shirt at the end of the study when everything is done, in appreciation of your contribution to the work.

### 8. What happens if I refuse to take part?

It is very important for you to know that you do not have to take part in the research, the choice is yours. No-one will be upset if you decide not to take part. If you agree to take part and later decide that you do not want to take part anymore, that is also okay.

### 9. What happens if something goes wrong?

The researchers will make every effort to ensure your safety and well-being. MRC/UVRI and LSHTM has a specialist insurance policy in place which would help to pay for treatment if any harm came to you as a result of taking part in the research.

### 10. Who will have access to your information and samples from this research?

Only research staff trained to keep the information confidential will have access to the records. Your name will be removed from the records and samples, so no-one will be able to find out information about you from our records.

### 11. Who has reviewed the trial?

This trial has been reviewed by the Uganda National Council for Science and Technology, The Uganda National Drug Authority, the Uganda Virus Research Institute Research and Ethics Committee the ethics committee of the London School of Hygiene and Tropical Medicine in the United Kingdom.

**You can find out more about the study at any time by asking one of the members of the research team. You may also contact Professor Alison Elliott (telephone: 0417 704000) who is in charge of the study, or the Chairperson of the Ethics Committee for the Uganda Virus Research Institute on 0414 321962.**

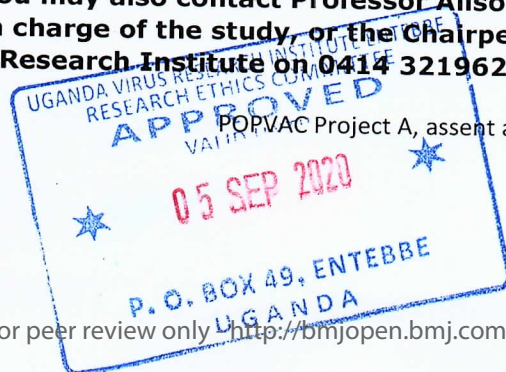

POPVAC Project A, assent age 9-12 years v1.3, 1<sup>st</sup> July 2019 | Page 3 of 5





PVA ID: |A|\_|\_|\_|\_|

**Witness:**

I have read the participant information sheet and the assent statement above

to:..... (PRINT NAME OF PARTICIPANT) in a language which he/she understands. I believe that he/she gives assent to take part in the study.

.....  
**Witness name**

.....  
**Signature**

.....  
**Date**

*Witness required only for those using a thumb print instead of the final signature, or unable to read the information and consent form, or if the person taking consent does not speak the participant's language. The witness must not be a member of the research staff or a study participant. The witness must be present for the whole consent process.*

**Person taking the assent:**

.....  
**Researcher name**

.....  
**Signature**

.....  
**Date**

**Comment:**

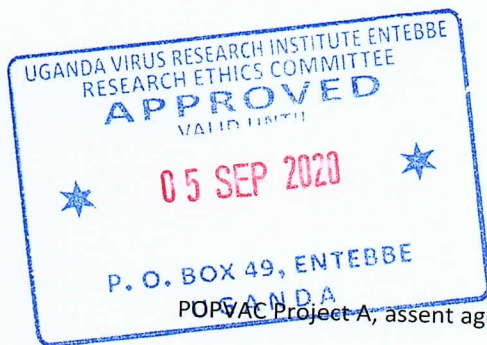

POPVAC Project A, assent age 9-12 years v1.3, 1<sup>st</sup> July 2019 | Page 5 of 5

1  
2  
3  
4  
5  
6  
7  
8  
9  
10  
11  
12  
13  
14  
15  
16  
17  
18  
19  
20  
21  
22  
23  
24  
25  
26  
27  
28  
29  
30  
31  
32  
33  
34  
35  
36  
37  
38  
39  
40  
41  
42  
43  
44  
45  
46  
47  
48  
49  
50  
51  
52  
53  
54  
55  
56  
57  
58  
59  
60

## MRC/UVRI and LSHTM Uganda Research Unit

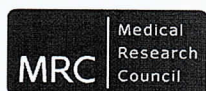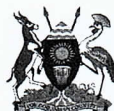

Uganda  
Virus  
Research  
Institute

LONDON  
SCHOOL of  
HYGIENE  
& TROPICAL  
MEDICINE

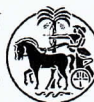

**Population differences in vaccine responses: the effect of intensive treatment for schistosomiasis on response to vaccines among island adolescents**

**Short Title: POPVAC Project A**

**Information Sheet for participants aged 13 to 17 years**

We are inviting you to join in some research which is being done by a team from Uganda Virus Research Institute (UVRI), working together with colleagues from the London School of Hygiene and Tropical Medicine, UK. This form will tell you about the research. If you have any questions, please ask the person who is telling you about this research. Then you can decide whether you want to take part or not. There is no need to take part unless you really wish to. If you agree to take part, you will need to sign the assent form to show us that you are happy to do so. If you decide you do not want to take part, do not sign the assent form.

The people leading this research study are Professor Alison Elliott and Dr Ludoviko Zirimenya.

**1. What this research is about, and the reason for doing this research.**

This research is about how worm infections like Bilharzia "switch off" the body's defence systems and how this affects vaccine responses. **We want to find out whether treating Bilharzia much more frequently (a total of 7 times in a year) can get rid of it completely and whether this will improve vaccine responses.**

**2. Why have I been asked to take part in this study?**

You have been asked because you are attending primary school in Koome islands.

**3. What is going to happen in this research study?**

Only if you agree, a comprehensive health check-up that will involve taking stool, urine and blood samples will be done. If everything is okay, the following will be done:

You will be put into one of the two **Bilharzia treatment** groups by luck

- One group will be treated for Bilharzia using praziquantel (the recommended medicine for Bilharzia) seven times in the year, and an eighth time after the end of the study.
- The other group will be treated for Bilharzia using praziquantel once in the year, and a second time after the end of the study.

You will be immunised with **several vaccines**. These are the vaccines:

- BCG vaccine. This is intended to protect against tuberculosis.
- Yellow fever vaccine. This protects against Yellow Fever virus carried by mosquitoes.
- HPV vaccine. Human Papilloma Virus (HPV) causes growths in private parts and cancer in girls and boys.
- Tetanus and diphtheria vaccines. Tetanus and diphtheria are bacterial infections that cause very serious disease.
- Typhoid vaccine. Typhoid is a serious form of fever which is spread through contaminated food.

These immunisations will be given on three different days

POPVAC Project A, assent age 13-17 years v1.3, 15 July 2019 | Page 1 of 6

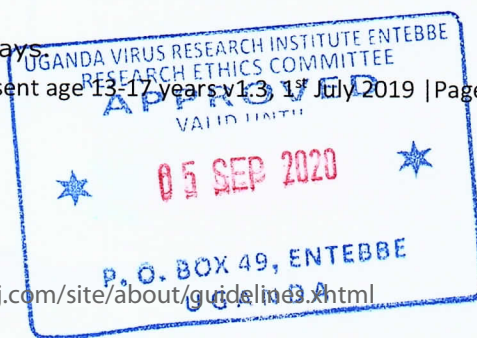



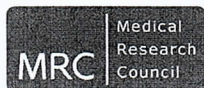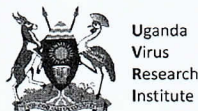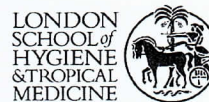

Most of the vaccines will be injected into your upper arm (either right or left side). This will be a bit painful, as for any injection of medicine that you may have had, and will feel a bit sore over the next week or so. The typhoid vaccine is an oral vaccine: it is in the form of capsules which are swallowed. You will be given one capsule per day for three alternating days.

You will be asked to give **blood samples**

We will ask you to give blood samples before and after you are given the vaccines. The amount of blood that we will take at each visit is completely safe and will vary between 4 and 27 millilitres (1 teaspoon and 5 and a half teaspoons) at the different visits

You will be asked to give **stool and urine samples**

At some visits we will ask you for additional stool and urine samples for testing to check whether the worm infections have responded to treatment or (for girls) whether you have become pregnant.

Some of you will be asked to take part in a special **sugar test** of absorption from the intestines

We think that worm infections may make our intestines a little bit leaky, and this might explain some of their effects. We can test this using a special sugar drink. We will ask about 200 people to do this additional test. If you are asked to do this, it will be done about 8 weeks after your first vaccine is given. You will be asked not to eat overnight or in the morning of the test day. Then you will be given a special drink that contains sugars early in the morning. Afterwards you will also be asked to drink a litre of water (equal to two Rwenzori bottles) over the following few hours. All the urine that you pass during the next five hours will be collected. The volume (amount) of urine will be measured and the amount of sugar in it will be tested, to find out how much of the sugar your body has absorbed.

**4. What will the blood, stool and urine samples be used for?**

The samples will be used to test for infections, including HIV, malaria and worms, to test for anaemia (the strength of your blood) and to test for pregnancy (among girls). The blood samples will also be used to test how your body responds to vaccines. For some participants, the sugar test will be used to test absorption from the intestines.

**5. How many people will take part in the study, and how long will it last?**

The whole study will enrol 480 people, and the study will last for about two years.

**6. What are the risks of participating in this trial?**

You will need to take time off classes during each visit by the study team.

Taking blood samples is not expected to cause any problem for you, apart from the discomfort or pain, bruising or bleeding, redness at the place where the needle goes into the skin, but this will go away in a few days.

During the sugar test you will be asked not to eat overnight and during the morning of the test so you may get hungry (although water and a snack will be provided). Most people have no problems with this test although a few may feel a little sick and stools may become a bit loose.

POPVAC Project A, assent age 13-17 years v1.3 | 1<sup>st</sup> July 2019 | Page 2 of 6

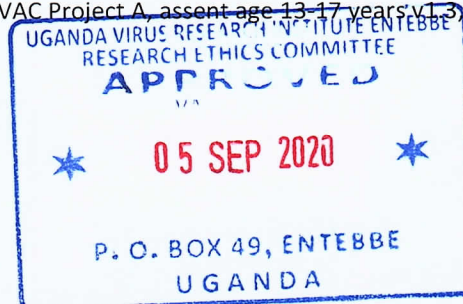



## MRC/UVRI and LSHTM Uganda Research Unit

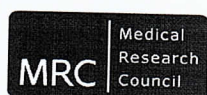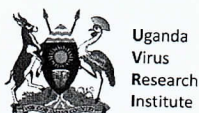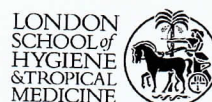

If you are a girl, even if you know you could not be pregnant. We have to be quite sure. We will test for pregnancy at the beginning of the study and on each immunisation day. You must as well promise that you can avoid getting pregnant while taking part in this study.

Treatment of Bilharzia with praziquantel may make you feel dizzy or sick, give you abdominal pain or diarrhoea, or occasionally cause an itchy rash. This is most likely caused by your body's response to the worms as they are being killed by the medicine. The research team will have medicines available to help you if you have a strong reaction to the treatment.

All the study vaccines are known to be safe though not often, may cause a serious reaction, such as an allergic reaction. The research doctors and nurses will be available to help if this happens.

### **7. What are the benefits of taking part in this trial?**

The treatment for Bilharzia is likely to be good for you, whichever group you are put in. The vaccines are likely to help you by protecting you from infectious diseases.

Also, you will be helping us to find out why vaccines sometimes don't work so well in countries like Uganda, and whether vaccines work better if worms are treated first. This may help other people in the future.

### **8. What is the cost of taking part in the trial?**

There is no cost to participate in this trial. You will receive a soft drink and the gift of a pen or other simple school material on days when blood samples are drawn, and the gift of a T-shirt at the end of the study when everything is done, in appreciation of your contribution to the work.

### **9. What happens if I refuse to take part?**

It is very important for you to know that you do not have to take part in the research, the choice is yours. No-one will be upset if you decide not to take part. If you agree to take part and later decide that you do not want to take part anymore, that is also okay.

### **10. What happens if something goes wrong?**

You will be making an important contribution to medical research. The researchers will make every effort to ensure your safety and well-being. MRC/UVRI and LSHTM has a specialist insurance policy in place which would help to pay for treatment if any harm came to you as a result of taking part in the research.

### **11. Who will have access to my information and samples from this research?**

All our research records are stored securely in rooms with restricted access and on password protected computers. Only research staff trained to keep the information confidential will have access to the records. Your name will be removed from the records, so no-one will be able to find out information about you from our records.

### **12. Who has reviewed the trial?**

This trial has been reviewed by the Uganda National Council for Science and Technology, Uganda National Drug Authority the Uganda Virus Research Institute Research and Ethics Committee the ethics committee of the London School of Hygiene and Tropical Medicine in the United Kingdom.

POPVAC Project A, assent age 13-17 years v1.3 - 1<sup>st</sup> JULY 2019 | Page 3 of 6

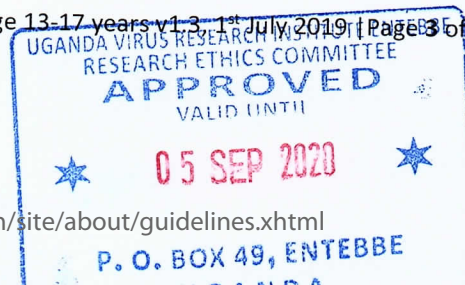



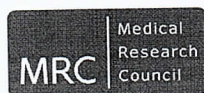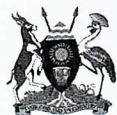

Uganda  
Virus  
Research  
Institute

LONDON  
SCHOOL of  
HYGIENE  
& TROPICAL  
MEDICINE

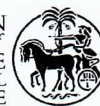

**You can find out more about the study at any time by asking one of the members of the research team. You may also contact Professor Alison Elliott (telephone: 0417 704000) who is in charge of the study, or the Chairperson of the Ethics Committee for the Uganda Virus Research Institute on 0414 321962.**

POPVAC Project A, assent age 13-17 years v1.3, 1<sup>st</sup> July 2019 | Page 4 of 6

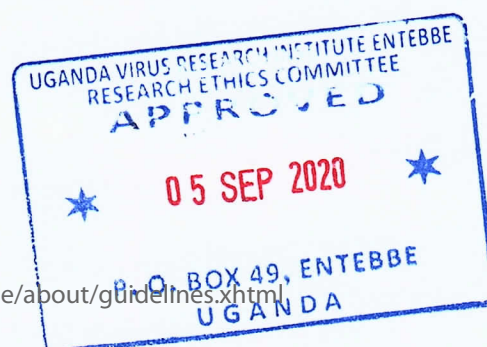

MRC/UVRI and LSHTM Uganda Research Unit

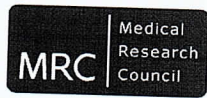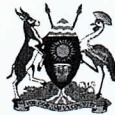

Uganda Virus Research Institute

LONDON SCHOOL of HYGIENE & TROPICAL MEDICINE

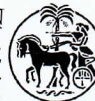

Population differences in vaccine responses: the effect of intensive treatment for schistosomiasis on response to vaccines among island adolescents

Short Title: POPVAC Project A

Participant Assent

A copy of this form will be given to you. Please keep a copy of the form because it contains the information that was discussed with you and you may want to look at it again.

AGREEMENT TO TAKE PART:

I have read and understood (or been read to and understand) the information sheet for this study. My questions have been answered. I understand that taking part in the study is voluntary. I understand that at any time I may withdraw from this study without giving a reason. I agree to participate in this study.

Name: \_\_\_\_\_ PVA ID: |A|\_|\_|\_|\_|\_|\_|\_|\_|\_|\_|
(please write your name in capital letters here if you agree)

Signature: \_\_\_\_\_ Date: \_\_\_\_\_
(please sign or write your name here if you agree; or use a thumbprint)

What if I have any questions?

If you have any questions about your participation in this study, please feel free to ask any member of the research team at any time. If you prefer, you may speak to the principal investigator for this study (Professor Alison Elliott, telephone 0417 704000).

What if we want to ask someone independent anything about this research, or have any questions about your rights as a research participant? You may speak with the Chairman of the Science and Ethics Committee at Uganda Virus Research Institute on 0414 321962.

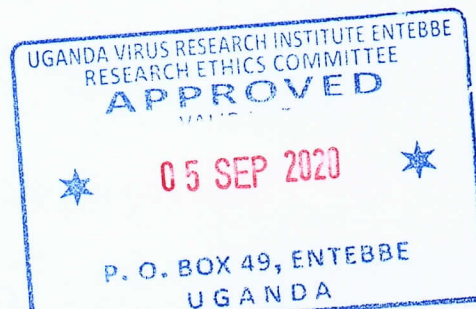

PVA ID: |A|\_|\_|\_|\_|

**Witness:**

I have read the participant information sheet and the assent statement above

to:..... (PRINT NAME OF PARTICIPANT) in a language which he/she understands. I believe that he/she gives assent to take part in the study.

|                     |                  |             |
|---------------------|------------------|-------------|
| .....               | .....            | .....       |
| <b>Witness name</b> | <b>Signature</b> | <b>Date</b> |

*Witness required only for those using a thumb print instead of the final signature, or unable to read the information and consent form, or if the person taking consent does not speak the participant's language. The witness must not be a member of the research staff or a study participant. The witness must be present for the whole consent process.*

**Person taking the assent:**

|                        |                  |             |
|------------------------|------------------|-------------|
| .....                  | .....            | .....       |
| <b>Researcher name</b> | <b>Signature</b> | <b>Date</b> |

**Comment:**

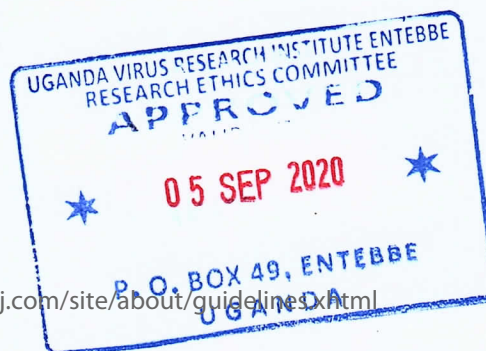



## MRC/UVRI and LSHTM Uganda Research Unit

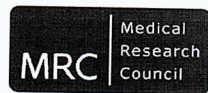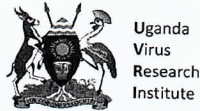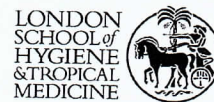

## Population differences in vaccine responses: the effect of intensive treatment for schistosomiasis on response to vaccines among island adolescents

### Short Title: POPVAC Project A

#### Information Sheet for emancipated or mature minors

We are inviting you to join in some research which is being done by a team from Uganda Virus Research Institute (UVRI), working together with colleagues from the London School of Hygiene and Tropical Medicine, UK. This form will tell you about the research. If you have any questions, please ask the person who is telling you about this research. Then you can decide whether you want to take part or not. If you agree to take part, you will need to sign the consent form to show us that you are happy to do so. If you decide that you do not want to take part, do not sign the consent form.

The people leading this research study are Professor Alison Elliott and Dr Ludoviko Zirimenya.

#### 1. What is this research about?

This research is about how worm infections like Bilharzia “switch off” the body’s defence systems and how this affects vaccine responses. **We want to find out whether treating Bilharzia much more frequently (a total of 7 times in a year) can get rid of it completely and whether this will improve vaccine responses.**

#### 2. Why have I been asked to take part in this study?

You have been asked because you are attending primary school in Koome islands.

#### 3. What is going to happen in this research study?

Only if you agree, you will have a comprehensive health check-up that will involve taking stool, urine and blood samples. If everything is okay, the following will be done:

You will be put into one of the two Bilharzia treatment groups by chance

One group will be treated for Bilharzia using praziquantel (the recommended medicine for Bilharzia) seven times in the year, and an eighth time after the end of the study.

The other group will be treated for Bilharzia using praziquantel once in the year, and a second time after the end of the study.

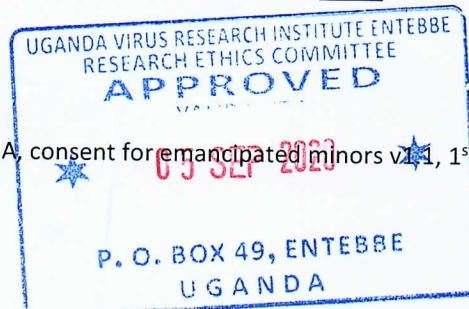

POPVAC Project A, consent for emancipated minors v1.1, 1<sup>st</sup> July 2019 | Page 1 of 6

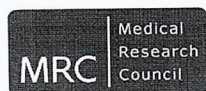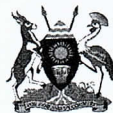Uganda  
Virus  
Research  
Institute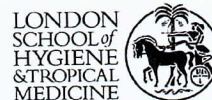

You will be immunised with **five (5) vaccines**. These are:

- **BCG vaccine.** This is intended to protect against tuberculosis.
- **Yellow fever vaccine.** This protects against Yellow Fever an infection carried by mosquitoes.
- **HPV vaccine.** Human Papilloma Virus (HPV) causes growths in private parts and cancer in girls and boys.
- **Tetanus and diphtheria vaccines.** Tetanus and diphtheria are bacterial infections that cause very serious disease.
- **Typhoid vaccine.** Typhoid is a serious form of fever which is spread through contaminated food.

These immunisations will be given on different times during the entire duration of the study.

Most of the vaccines will be injected into your upper arm (either right or left side). The typhoid vaccine is an oral vaccine: it is in the form of capsules which are swallowed. You will be given one capsule per day for three alternating days.

#### You will be asked to give **blood samples**

We will ask you to give blood samples before and after you are given the vaccines. The amount of blood that we will take at each visit is completely safe and will vary between 4 and 27 millilitres (1 teaspoon and 5 and a half teaspoons) at the different visits.

#### You will be asked to give **stool and urine samples**

At some visits we will ask you for additional stool and urine samples for testing to check whether the worm infections have responded to treatment or (for girls) whether you have become pregnant.

#### Some of you will be asked to take part in a special **sugar test** of absorption from the intestines

We think that worm infections may make our intestines a little bit leaky, and this might explain some of their effects. We can test this using a special sugar drink. We will ask about 200 people to do this additional test. If you are asked to do this, it will be done about 8 weeks after your first vaccine is given. You will be asked not to eat overnight or in the morning of the test day. Then you will be given a special drink that contains sugars early in the morning. Afterwards you will also be asked to drink a litre of water (equal to two Rwenzori bottles) over the following few hours. All the urine that you pass during the next five hours will be collected. The volume (amount) of urine will be measured and the amount of sugar in it will be tested, to find out how much of the sugar your body has absorbed.

POPVAC Project A, consent for emancipated minors v1.1, 1<sup>st</sup> July 2019 | Page 2 of 6

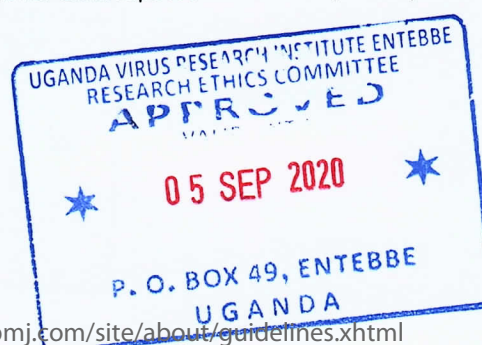



## MRC/UVRI and LSHTM Uganda Research Unit

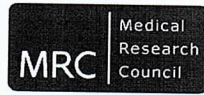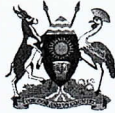

Uganda  
Virus  
Research  
Institute

LONDON  
SCHOOL of  
HYGIENE  
& TROPICAL  
MEDICINE

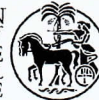

#### 4. What will the blood, stool and urine samples be used for?

The samples will be used to test for infections, including HIV, malaria and worms, to test for anaemia (the strength of your blood) and to test for pregnancy (among girls). The blood samples will also be used to test how your body responds to vaccines.

#### 5. How many people will take part in the study, and how long will it last?

The whole study will enrol 480 people, and the study will last for about two years.

#### 6. What are the risks of participating in this trial?

- You will need to take time off classes during each visit by the study team.
- Taking blood samples is not expected to cause any problem for you, apart from the discomfort or pain, bruising or bleeding, redness at the place where the needle goes into the skin, but this will go away in a few days.
- During the sugar test, you will be asked not to eat overnight and during the morning of the test so you may get hungry (although water and a snack will be provided). This may make you feel a little sick and stools may become a bit loose.
- If you are a girl, even if you know you could not be pregnant, we will do a pregnancy test. We have to be quite sure. You must as well promise that you can avoid getting pregnant while taking part in this study.
- Treatment of Bilharzia with praziquantel may make you feel dizzy or sick, give you abdominal pain or diarrhoea, or occasionally cause an itchy rash. The research team will have medicines available to help you if you have a strong reaction to the treatment.
- All the study vaccines are known to be safe. However, very occasionally even approved vaccines may cause a serious reaction, such as an allergic reaction. The research doctors and nurses will be available to help if this happens.

#### 7. What are the benefits of taking part in this trial?

The treatment for Bilharzia is likely to be good for you, whichever group you are put in. The vaccines are likely to help you by protecting you from infectious diseases.

Also, you will be helping us to find out why vaccines sometimes don't work so well in countries like Uganda, and whether vaccines work better if worms are treated first. This may help other people in the future.

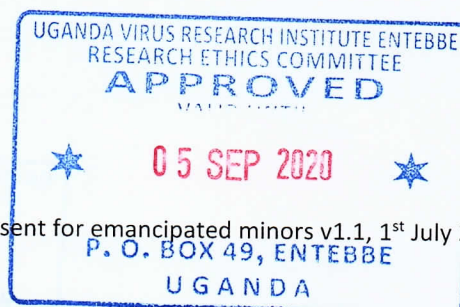

POPVAC Project A, consent for emancipated minors v1.1, 1<sup>st</sup> July 2019 | Page 3 of 6

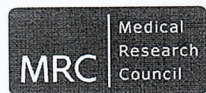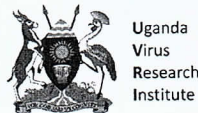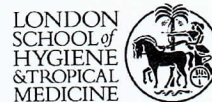

## 8. What is the cost of taking part in the trial?

There is no cost to participate in this trial. You will receive a soft drink and the gift of a pen or other simple school material on days when blood samples are drawn, and the gift of a T-shirt at the end of the study when everything is done, in appreciation of your contribution to the work.

## 9. What happens if I refuse to take part?

It is very important for you to know that you do not have to take part in the research, the choice is yours. No-one will be upset if you decide not to take part. If you agree to take part and later decide that you do not want to take part anymore, that is also okay.

## 10. What happens if something goes wrong?

The researchers will make every effort to ensure your safety and well-being. MRC/UVRI and LSHTM has a specialist insurance policy in place which would help to pay for treatment if any harm came to you as a result of taking part in the research.

## 11. Who will have access to my information and samples from this research?

All our research records and samples are stored securely in rooms with restricted access and on password protected computers. Only research staff trained to keep the information confidential will have access to the them. Your name will be removed from the records, so no-one will be able to find out information about you from our records.

## 12. Who has reviewed the trial?

This trial has been reviewed by the Uganda National Council for Science and Technology, The Uganda National Drug Authority, the Uganda Virus Research Institute Research and Ethics Committee the ethics committee of the London School of Hygiene and Tropical Medicine in the United Kingdom.

**You can find out more about the study at any time by asking one of the members of the research team. You may also contact Professor Alison Elliott (telephone: 0417 704000) who is in charge of the study, or the Chairperson of the Ethics Committee for the Uganda Virus Research Institute on 0414 321962.**

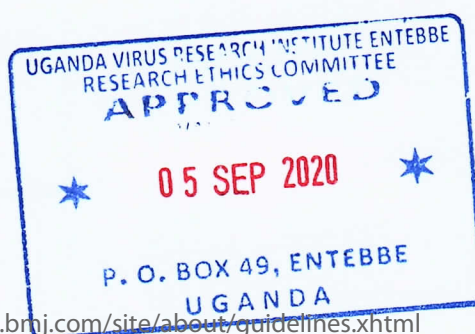





PVA ID | A | \_\_\_ | \_\_\_ | \_\_\_ | \_\_\_ |

**Witness:**

I have read the participant information sheet and the consent statement above

to:..... (PRINT NAME OF PARTICIPANT) in a language which he/she understands. I believe that he/she gives consent to take part in the study.

|                     |                  |             |
|---------------------|------------------|-------------|
| .....               | .....            | .....       |
| <b>Witness name</b> | <b>Signature</b> | <b>Date</b> |

*Witness required only for those using a thumb print instead of the final signature, or unable to read the information and consent form, or if the person taking consent does not speak the participant's language. The witness must not be a member of the research staff or a study participant. The witness must be present for the whole consent process.*

**Person taking the consent:**

|                        |                  |             |
|------------------------|------------------|-------------|
| .....                  | .....            | .....       |
| <b>Researcher name</b> | <b>Signature</b> | <b>Date</b> |

**Comment:**

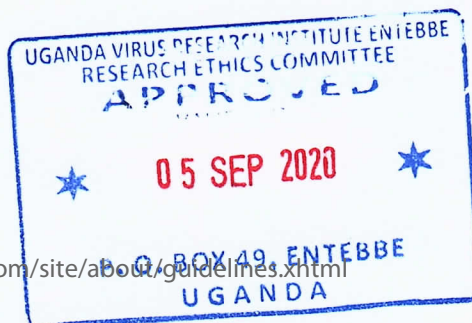



## MRC/UVRI and LSHTM Uganda Research Unit

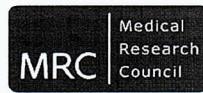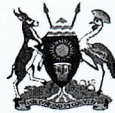

Uganda  
Virus  
Research  
Institute

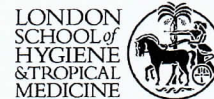

## Population differences in vaccine responses: the effect of intensive treatment for schistosomiasis on response to vaccines among island adolescents

### Short Title: POPVAC Project A

### Information Sheet for parents/guardians

We are inviting your child to join in some research which is being done by a team from Uganda Virus Research Institute (UVRI), working together with colleagues from the London School of Hygiene and Tropical Medicine, UK. This form will tell you about the research. If you have any questions, please ask the person who is telling you about this research. Then you can decide whether you want your child to take part or not. There is no need for your child to take part unless you really want him/her to do so. If you agree for your child to take part, you will need to sign the consent form to show us that you are happy for him/her to do so. If you decide that you do not want your child to take part, do not sign the consent form.

The people leading this research study are Professor Alison Elliott and Dr Ludoviko Zirimenya.

#### 1. What this research is about, and the reason for doing this research?

Vaccines are a very important tool for preventing infectious diseases. They have saved many lives. Vaccines are usually made from a weakened or killed strain of the bacteria or viruses that cause infectious diseases, or from a part of the bacteria or viruses. Vaccines are designed to help our body's defence system to recognise infectious diseases before we actually meet them, so that we can defeat them more easily. **However, some vaccines seem to work less well in hot countries, near the equator (such as Uganda), than in cooler countries (such as the United Kingdom, the UK).** We want to find out why this is so.

Worm infections are much more common in warm countries (such as Uganda) than in cooler countries (such as the UK). Bilharzia (schistosomiasis) is a worm infection which is very common in Koome islands. Almost everyone in Koome has Bilharzia. Worms can live in our bodies for many years. To do this they have to be able to switch off some of our body's defence systems so that they will not be killed. **We think that this "switching off" of defence systems may also prevent some vaccines from working well.** If this is true then treating worms before giving vaccines might result in better responses to the vaccines.

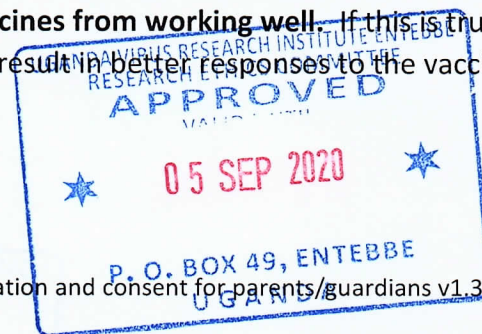

POPVAC Project A, information and consent for parents/guardians v1.3, 1<sup>st</sup> July 2019 | Page 1 of 9

1  
2  
3 Light infections with Bilharzia may not be noticed but heavy infections can cause serious  
4 damage, especially to the liver. That is why the Ugandan government usually gives treatment  
5 for Bilharzia once a year in Ugandan schools. This usually reduces the number of Bilharzia  
6 worms but does not get rid of them. **We want to find out whether treating Bilharzia much  
7 more frequently (a total of 7 times in a year) can get rid of it completely and whether this will  
8 improve vaccine responses.**  
9  
10

## 11 **2. Why has my child been asked to take part in this study?**

12  
13 Your child has been asked because he/she is attending primary school in Koome islands, in  
14 primary 1 to 6. Bilharzia infection is often heaviest in people of primary school age. Also, the  
15 government of Uganda offers vaccines to your child's age group that will help to protect them  
16 from infectious diseases later on. So it is important to know whether Bilharzia can affect these  
17 vaccines, and whether treating Bilharzia effectively is helpful.  
18  
19

## 20 **3. What is going to happen in this research study?**

### 21 Your child will have a health check-up

22  
23 If you want your child to take part in this study, we will first check your child's health, and take  
24 stool samples, urine samples and some blood from a vein in your child's arm and do some tests.  
25 These will include tests for infections including HIV, malaria and worms, tests for anaemia (the  
26 strength of blood in your child's body), and tests for pregnancy if your child is a girl.  
27  
28

29  
30 If everything is okay then we will enrol your child in the study. If something is not okay then we  
31 will either give your child the treatment that he/she needs, or tell you what to do.  
32

### 33 Your child will be put into one of the two **Bilharzia treatment** groups

34  
35 When your child is enrolled in the study we will put your child into one of two groups.  
36

- 37 • One group will be treated for Bilharzia using praziquantel (the recommended medicine  
38 for Bilharzia) seven times in the year, and an eighth time after the end of the study.
- 39 • The other group will be treated for Bilharzia using praziquantel once in the year, and a  
40 second time after the end of the study.  
41  
42

43 The choice of groups will be done using a code generated by computer. This works so that your  
44 child is put into one group or the other by luck – this is like a lottery.  
45  
46  
47  
48  
49  
50  
51  
52

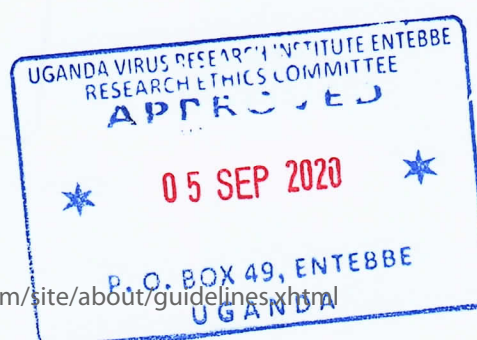



Your child will be immunised with **several vaccines**. These are the vaccines:

- BCG vaccine. This is intended to protect against tuberculosis. Tuberculosis is very common in Uganda. Many people receive the BCG vaccine as a baby. BCG can be given again at school age and may help to protect against tuberculosis later on although the level of protection varies a lot between countries. We do not know how well it works in school children in Uganda.
- Yellow fever vaccine. This protects against Yellow Fever. Yellow fever is a virus carried by mosquitoes. Yellow fever disease affects the liver and causes fever and jaundice (yellow eyes). Outbreaks occur in Uganda and neighbouring countries from time to time – an outbreak is when a group of people falls sick around the same time.
- HPV vaccine. Human Papilloma Virus (HPV) causes warts. As well, some strains of HPV can cause cancer in the genital areas, especially on the cervix (the opening of the womb) in girls. HPV can also cause cancer of the penis in boys, and other cancers. The HPV vaccine reduces the risk of infection with dangerous HPV strains that cause cancer. In this way it reduces the risk of cancers. The Ugandan government recently started offering this vaccine to girls in primary 4. We will give this vaccine to you if you are a girl (in any class) and you have not received it already. We will also give this vaccine to boys because it can protect them against some cancers too.
- Tetanus and diphtheria vaccines. Tetanus and diphtheria are bacterial infections. The tetanus and diphtheria bacteria produce chemicals called toxins which cause diseases. Tetanus bacteria infect deep wounds and produce tetanus toxin which causes very serious muscle spasms. Tetanus can affect young babies if the wound where the umbilical cord is cut becomes infected. Immunising young women can protect their future babies too. Diphtheria causes a very serious throat infection. Tetanus and diphtheria immunisation is given to babies but booster immunisation is recommended by the Uganda government for school children also.
- Typhoid vaccine. Typhoid is a serious form of fever which is spread through contaminated food. Outbreaks occur in Uganda. Immunisation against typhoid can prevent this illness.

These immunisations will be given at three different time points. BCG will be given first. HPV vaccine, oral typhoid vaccine and yellow fever vaccine will be given four weeks later. A second dose of HPV vaccine and first dose of Tetanus/diphtheria vaccine will be given at 28 weeks after the BCG immunisation.

Most of the vaccines will be injected into your child's upper arm (either right or left). This will be a bit painful, as for any injection of medicine that you may have had, and will feel a bit sore over the next week or so. The BCG vaccine is likely to form a small swelling and then an ulcer

POPVAC Project A, information and consent for parents/guardians v1.3, 1<sup>st</sup> July 2019 | Page 3 of 9

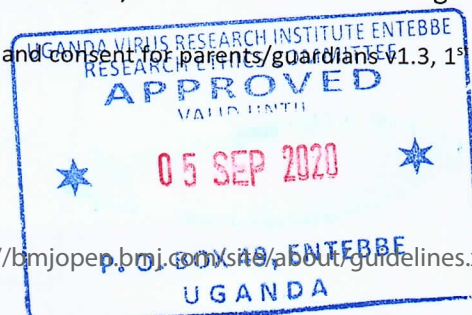



1  
2  
3 which may take quite some time (perhaps two to five months) to heal. The typhoid vaccine is  
4 an oral vaccine: it is in the form of capsules which are swallowed. Your child will be given one  
5 capsule per day for three alternating days.  
6

#### 7 Your child will be asked to give **blood samples**

8  
9 To test your child's response to the vaccines we will ask your child to give blood samples before  
10 and after they are given the vaccines. The amount of blood that we will take at each visit is  
11 completely safe and will vary between 4 and 27 millilitres (1 teaspoon and 5 and a half  
12 teaspoons) at the different visits. In total we will ask your child to give blood samples at 7  
13 different times during the study. The study will last for about two years.  
14

#### 15 Your child will be asked to give **stool and urine samples**

16  
17 At some visits we will ask your child for additional stool and urine samples for testing to check  
18 whether the worm infections have responded to treatment or (for girls) whether your child has  
19 become pregnant.  
20

#### 21 Some of the children will be asked to take part in a special **sugar test** of absorption from the 22 intestines

23  
24 We think that worm infections may make our intestines a little bit leaky, and this might explain  
25 some of their effects. We can test this using a special sugar drink. We will ask about 200  
26 children to do this additional test. If your child is asked to do this, it will be done about 8 weeks  
27 after the first vaccine is given. He/she will be asked not to eat overnight or in the morning of  
28 the test day. Then he/she will be given a special drink that contains sugars early in the  
29 morning. Afterwards he/she will also be asked to drink a litre of water (equal to two Rwenzori  
30 bottles) over the following few hours. All the urine that he/she passes during the next five  
31 hours will be collected. The volume (amount) of urine will be measured and the amount of  
32 sugar in it will be tested, to find out how much of the sugar his/her body has absorbed.  
33

34  
35 **If you do not want your child to take part in the study, to have blood, urine and stool samples  
36 taken or to receive the treatment and vaccines, you can say no to your child's taking part in  
37 this study.**  
38

#### 39 **4. What will the blood, stool and urine samples be used for?**

40  
41 The samples will be used to test for infections, including HIV, malaria and worms, to test for  
42 anaemia (the strength of your child's blood) and to test for pregnancy (among girls). The blood  
43 samples will also be used to test how your child's body responds to vaccines.  
44

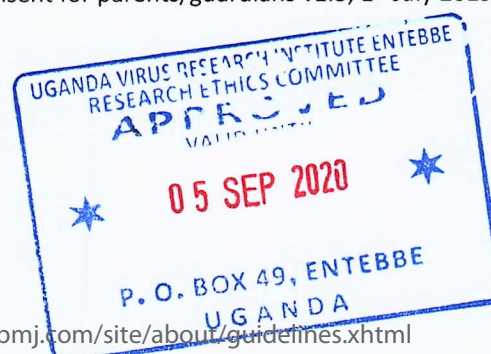



1  
2  
3  
4  
5  
6  
7 **5. How many people will take part in the study, and how long will it last?**

8  
9 The whole study will enrol 480 people, and the study will last for about two years.

10  
11 **6. What are the risks of participating in this trial?**

12  
13 Your child's time

14  
15 Your child will need to take time off classes during each visit by the study team. There will be  
16 12 visits altogether. Each visit will usually take about 30 minutes, but the first visit may take  
17 about two hours to give time for everything to be explained, and for a thorough check-up. The  
18 research team will work with teachers to avoid disturbing classes too much.

19  
20  
21 Blood samples

22  
23 Taking blood samples is not expected to cause any problem for your child, apart from the  
24 discomfort or pain, bruising or bleeding, redness at the place where the needle goes into the  
25 skin, but this will go away in a few days. There is a very small chance that your child may get an  
26 infection or some swelling at this place – this almost never happens. Some people faint when  
27 their blood is taken. The person taking the blood will do all they can to prevent these things  
28 from happening.

29  
30  
31 Sugar test

32  
33 During the sugar test your child will be asked not to eat overnight and during the morning of  
34 the test so he/she may get hungry (although water and a snack will be provided). Most people  
35 have no problems with this test although a few may feel a little sick and stools may become a  
36 bit loose.

37  
38  
39 Pregnancy

40  
41 We do not know how some of these vaccines might affect a developing baby if they were given  
42 to someone who was pregnant. That is why we will do a pregnancy test, if your child is a girl,  
43 even if she knows she could not be pregnant. We have to be quite sure. We will test for  
44 pregnancy at the beginning of the study and on each immunisation day. We will not enrol your  
45 child in the study if she is pregnant at the start. We will not give your child the vaccines if she  
46 falls pregnant later.

47  
48  
49 Bilharzia treatment

50  
51 Treatment of Bilharzia with praziquantel may make your child feel dizzy or sick, give your child  
52 abdominal pain or diarrhoea, or occasionally cause an itchy rash. This is most likely caused by

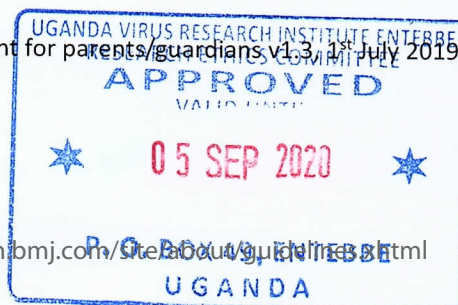

1  
2  
3 the body's response to the worms as they are being killed by the medicine. The research team  
4 will have medicines available to help your child if he/she has a strong reaction to the treatment.  
5

### 6 Immunisations

7  
8 All the vaccines that we will give have been used to protect very large numbers of people and  
9 are known to be safe. They are not expected to cause any major problems for your child. As  
10 mentioned, the BCG vaccine is expected to cause an ulcer and to heal slowly, leaving a scar. The  
11 injections will cause some pain at the time of injection and your child's arm will feel a bit sore  
12 for a day or two. Some people develop flu-like symptoms including headache and fever for a  
13 day or two. It is fine for your child to take painkillers like paracetamol (Panadol) for these  
14 symptoms. The typhoid vaccine, which your child will swallow as capsules, is not expected to  
15 cause your child any problem at all, although your child may experience some stomach pain,  
16 feeling sick, vomiting and (rarely) rash.  
17  
18

19  
20  
21 Very occasionally any vaccine can cause a serious reaction, such as an allergic reaction. The  
22 research doctors and nurses will be available to help if this happens.  
23

### 24 **7. What are the benefits of taking part in this trial?**

25  
26 The treatment for Bilharzia is likely to be good for your child, whichever group he or she is put  
27 in. The vaccines are likely to help your child by protecting him/her from infectious diseases.  
28

29  
30 Also, you and your child will be helping us to find out why vaccines sometimes don't work so  
31 well in countries like Uganda, and whether vaccines work better if worms are treated first. This  
32 may help other people in the future.  
33

### 34 **8. What is the cost of taking part in the trial?**

35  
36 There is no cost to participate in this trial. We will reimburse you (the parents) for the time you  
37 spend at meetings at school, 20,000/= (twenty thousand shillings) for each visit. Your child will  
38 receive a soft drink and the gift of a pen or other simple school material on days when blood  
39 samples are drawn, and the gift of a T-shirt at the end of the study when everything is done, in  
40 appreciation of his/her contribution to the work.  
41  
42  
43  
44

### 45 **9. What happens if I refuse for my child to take part?**

46  
47 It is very important for you to know that your child does not have to take part in the research,  
48 the choice is yours and your child's. No-one will be upset if your child decides not to take part.  
49 The teachers will not be upset and the research team will not be upset. If you agree for your  
50 child to take part and later decide that you do not want him/her to take part anymore, that is  
51 also okay. Whatever happens, your child will still be able to receive the treatment for Bilharzia  
52

53 POPVAC Project A, information and consent for parents/guardians v1.3, 1<sup>st</sup> July 2019, Page 6 of 9

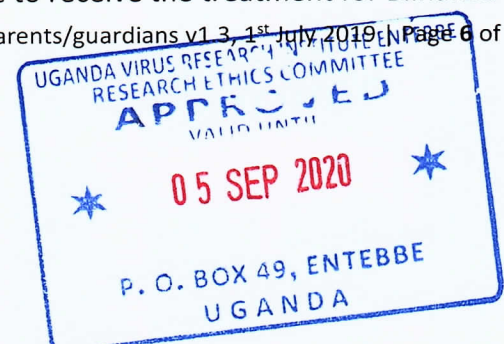



and the immunisations for HPV and tetanus and diphtheria when they are provided by the government, if you wish.

### 10. Who will be able to see the results of tests done on my child's samples?

The research team will keep your child's results private. Only members of the research team will be able to see results and to know that they belong to your child. Your child's samples will be given a special code so that anyone who is working on them in research laboratories will not know they came from your child.

### 11. What happens if something goes wrong?

You and your child will be making an important contribution to medical research. The researchers will make every effort to ensure your child's safety and well-being. MRC/UVRI and LSHTM has a specialist insurance policy in place which would help to pay for treatment if any harm came to your child as a result of taking part in the research.

### 12. Who will have access to information from this research?

All our research records are stored securely in rooms with restricted access and on password protected computers. Only research staff trained to keep the information confidential will have access to the records. Your child's name will be removed from the records, so no-one will be able to find out information about your child from our records. The people who may review your child's records include Research Ethics Committees (Uganda Virus Research Institute Research Ethics Committee and the London School of Hygiene & Tropical Medicine Ethics Committee) the Uganda National Council Science and Technology, Study Monitors, Sponsor and the Uganda National Drug Authority. These organisations are there to ensure that your child's rights are protected and that the research is conducted properly and safely.

### 13. Who has reviewed the trial?

This trial has been reviewed by the Uganda National Council for Science and Technology, the Uganda Virus Research Institute Research and Ethics Committee, the ethics committee of the London School of Hygiene and Tropical Medicine in the United Kingdom. The Uganda National Drug Authority, which regulates the use of all medicines in Uganda, has granted permission to use the medicines and vaccines needed for this clinical trial.

**You can find out more about the study at any time by asking one of the members of the research team. You may also contact Professor Alison Elliott (telephone: 0417 704000) who is in charge of the study, or the Chairperson of the Ethics Committee for the Uganda Virus Research Institute on 0414 321962.**

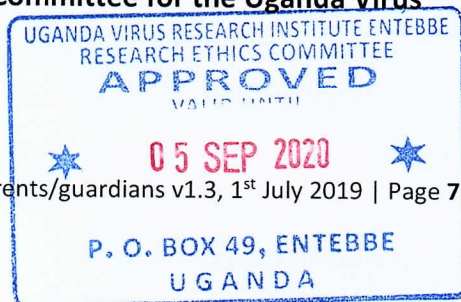

POPVAC Project A, information and consent for parents/guardians v1.3, 1<sup>st</sup> July 2019 | Page 7 of 9

## MRC/UVRI and LSHTM Uganda Research Unit

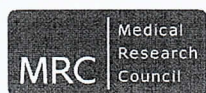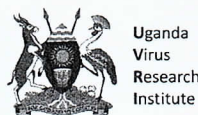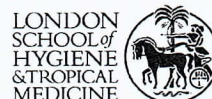

**Population differences in vaccine responses: the effect of intensive treatment for schistosomiasis on response to vaccines among island adolescents**

**Short Title: POPVAC Project A**

**Parent/guardian consent**

A copy of this form will be given to you. Please keep a copy of the form because it contains the information that was discussed with you and you may want to look at it again.

**Participant (child) name:** \_\_\_\_\_ **PVA ID|A|**\_\_\_\_|\_\_\_\_|\_\_\_\_|\_\_\_\_|  
(please write your child's name in capital letters here if you agree)

**AGREEMENT BY PARENT OR GUARDIAN:**

I have read and/or been fully explained the information sheet concerning my child's participation in this study and I understand what will be required if he or she takes part. I understand that my child's participation is voluntary. My questions concerning this study have been answered. I understand that at any time, I may withdraw my child from this study without giving a reason and without affecting his or her entitlement to government health care. I agree for my child to take part in this study.

**Name:** \_\_\_\_\_  
(please write your name in capital letters here if you agree)

**Signature:** \_\_\_\_\_ **Date:** \_\_\_\_\_  
(please sign or write your name here if you agree; or use a thumbprint)

**What if I have any questions?**

If you have any questions about your participation in this study, please feel free to ask any member of the research team at any time. If you prefer, you may speak to the principal investigator for this study (Professor Alison Elliott, telephone 0417 704000).

**What if we want to ask someone independent anything about this research, or have any questions about your rights as a research participant?** You may speak with the Chairman of the Science and Ethics Committee at Uganda Virus Research Institute on 0414 321962.

POPVAC Project A, information and consent for parents/guardians v1.3, 1<sup>st</sup> July 2019 | Page 8 of 9

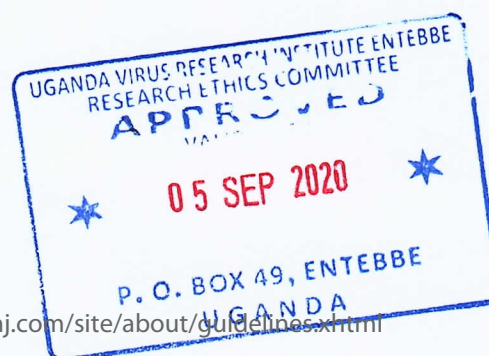





1  
2  
3  
4  
5  
6  
7  
8  
9  
10  
11  
12  
13  
14  
15  
16  
17  
18  
19  
20  
21  
22  
23  
24  
25  
26  
27  
28  
29  
30  
31  
32  
33  
34  
35  
36  
37  
38  
39  
40  
41  
42  
43  
44  
45  
46  
47  
48  
49  
50  
51  
52  
53  
54  
55  
56  
57  
58  
59  
60

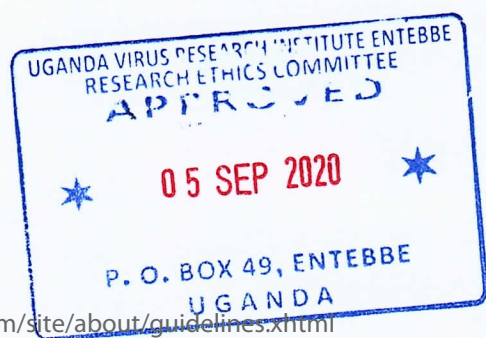



# Reporting checklist for protocol of a clinical trial.

Based on the SPIRIT guidelines.

## Instructions to authors

Complete this checklist by entering the page numbers from your manuscript where readers will find each of the items listed below.

Your article may not currently address all the items on the checklist. Please modify your text to include the missing information. If you are certain that an item does not apply, please write "n/a" and provide a short explanation.

Upload your completed checklist as an extra file when you submit to a journal.

In your methods section, say that you used the SPIRIT reporting guidelines, and cite them as:

Chan A-W, Tetzlaff JM, Altman DG, Laupacis A, Gøtzsche PC, Krleža-Jerić K, Hróbjartsson A, Mann H, Dickersin K, Berlin J, Doré C, Parulekar W, Summerskill W, Groves T, Schulz K, Sox H, Rockhold FW, Rennie D, Moher D. SPIRIT 2013 Statement: Defining standard protocol items for clinical trials. *Ann Intern Med.* 2013;158(3):200-207

|                                   | Reporting Item                                                                                                                  | Page Number                                |
|-----------------------------------|---------------------------------------------------------------------------------------------------------------------------------|--------------------------------------------|
| <b>Administrative information</b> |                                                                                                                                 |                                            |
| Title                             | <a href="#">#1</a> Descriptive title identifying the study design, population, interventions, and, if applicable, trial acronym | 1                                          |
| Trial registration                | <a href="#">#2a</a> Trial identifier and registry name. If not yet registered, name of intended registry                        | 2                                          |
| Trial registration: data set      | <a href="#">#2b</a> All items from the World Health Organization Trial Registration Data Set                                    | n/a                                        |
| Protocol version                  | <a href="#">#3</a> Date and version identifier                                                                                  | Information available at<br>ISRCTN60517191 |
| Funding                           | <a href="#">#4</a> Sources and types of financial, material, and other support                                                  | 15                                         |
| Roles and                         | <a href="#">#5a</a> Names, affiliations, and roles of protocol                                                                  | 15                                         |

|                                                            |                     |                                                                                                                                                                                                                                                                                          |                                                              |
|------------------------------------------------------------|---------------------|------------------------------------------------------------------------------------------------------------------------------------------------------------------------------------------------------------------------------------------------------------------------------------------|--------------------------------------------------------------|
| responsibilities:<br>contributorship                       |                     | contributors                                                                                                                                                                                                                                                                             |                                                              |
| Roles and responsibilities:<br>sponsor contact information | <a href="#">#5b</a> | Name and contact information for the trial sponsor                                                                                                                                                                                                                                       | Information available at<br>ISRCTN60517191                   |
| Roles and responsibilities:<br>sponsor and funder          | <a href="#">#5c</a> | Role of study sponsor and funders, if any, in study design; collection, management, analysis, and interpretation of data; writing of the report; and the decision to submit the report for publication, including whether they will have ultimate authority over any of these activities | 16                                                           |
| Roles and responsibilities:<br>committees                  | <a href="#">#5d</a> | Composition, roles, and responsibilities of the coordinating centre, steering committee, endpoint adjudication committee, data management team, and other individuals or groups overseeing the trial, if applicable (see Item 21a for data monitoring committee)                         | Information detailed in<br>supplementary<br>information file |
| <b>Introduction</b>                                        |                     |                                                                                                                                                                                                                                                                                          |                                                              |
| Background and rationale                                   | <a href="#">#6a</a> | Description of research question and justification for undertaking the trial, including summary of relevant studies (published and unpublished) examining benefits and harms for each intervention                                                                                       | 4                                                            |
| Background and rationale: choice of comparators            | <a href="#">#6b</a> | Explanation for choice of comparators                                                                                                                                                                                                                                                    | 8                                                            |
| Objectives                                                 | <a href="#">#7</a>  | Specific objectives or hypotheses                                                                                                                                                                                                                                                        | 6                                                            |
| Trial design                                               | <a href="#">#8</a>  | Description of trial design including type of trial (eg, parallel group, crossover, factorial, single group), allocation ratio, and framework (eg, superiority, equivalence, non-inferiority, exploratory)                                                                               | 7                                                            |

**Methods:  
Participants,  
interventions, and  
outcomes**

|    |                      |                      |                                                                                                                                                                                                                                                                                                                                                                                |                                                           |
|----|----------------------|----------------------|--------------------------------------------------------------------------------------------------------------------------------------------------------------------------------------------------------------------------------------------------------------------------------------------------------------------------------------------------------------------------------|-----------------------------------------------------------|
| 1  | Study setting        | <a href="#">#9</a>   | Description of study settings (eg, community clinic, academic hospital) and list of countries where data will be collected. Reference to where list of study sites can be obtained                                                                                                                                                                                             | 7                                                         |
| 2  |                      |                      |                                                                                                                                                                                                                                                                                                                                                                                |                                                           |
| 3  |                      |                      |                                                                                                                                                                                                                                                                                                                                                                                |                                                           |
| 4  |                      |                      |                                                                                                                                                                                                                                                                                                                                                                                |                                                           |
| 5  |                      |                      |                                                                                                                                                                                                                                                                                                                                                                                |                                                           |
| 6  |                      |                      |                                                                                                                                                                                                                                                                                                                                                                                |                                                           |
| 7  |                      |                      |                                                                                                                                                                                                                                                                                                                                                                                |                                                           |
| 8  | Eligibility criteria | <a href="#">#10</a>  | Inclusion and exclusion criteria for participants. If applicable, eligibility criteria for study centres and individuals who will perform the interventions (eg, surgeons, psychotherapists)                                                                                                                                                                                   | 7                                                         |
| 9  |                      |                      |                                                                                                                                                                                                                                                                                                                                                                                |                                                           |
| 10 |                      |                      |                                                                                                                                                                                                                                                                                                                                                                                |                                                           |
| 11 |                      |                      |                                                                                                                                                                                                                                                                                                                                                                                |                                                           |
| 12 |                      |                      |                                                                                                                                                                                                                                                                                                                                                                                |                                                           |
| 13 |                      |                      |                                                                                                                                                                                                                                                                                                                                                                                |                                                           |
| 14 | Interventions:       | <a href="#">#11a</a> | Interventions for each group with sufficient detail to allow replication, including how and when they will be administered                                                                                                                                                                                                                                                     | 8                                                         |
| 15 | description          |                      |                                                                                                                                                                                                                                                                                                                                                                                |                                                           |
| 16 |                      |                      |                                                                                                                                                                                                                                                                                                                                                                                |                                                           |
| 17 |                      |                      |                                                                                                                                                                                                                                                                                                                                                                                |                                                           |
| 18 |                      |                      |                                                                                                                                                                                                                                                                                                                                                                                |                                                           |
| 19 |                      |                      |                                                                                                                                                                                                                                                                                                                                                                                |                                                           |
| 20 | Interventions:       | <a href="#">#11b</a> | Criteria for discontinuing or modifying allocated interventions for a given trial participant (eg, drug dose change in response to harms, participant request, or improving / worsening disease)                                                                                                                                                                               | Detailed in supplementary information file                |
| 21 | modifications        |                      |                                                                                                                                                                                                                                                                                                                                                                                |                                                           |
| 22 |                      |                      |                                                                                                                                                                                                                                                                                                                                                                                |                                                           |
| 23 |                      |                      |                                                                                                                                                                                                                                                                                                                                                                                |                                                           |
| 24 |                      |                      |                                                                                                                                                                                                                                                                                                                                                                                |                                                           |
| 25 |                      |                      |                                                                                                                                                                                                                                                                                                                                                                                |                                                           |
| 26 |                      |                      |                                                                                                                                                                                                                                                                                                                                                                                |                                                           |
| 27 | Interventions:       | <a href="#">#11c</a> | Strategies to improve adherence to intervention protocols, and any procedures for monitoring adherence (eg, drug tablet return; laboratory tests)                                                                                                                                                                                                                              | Detailed in supplementary information file                |
| 28 | adherence            |                      |                                                                                                                                                                                                                                                                                                                                                                                |                                                           |
| 29 |                      |                      |                                                                                                                                                                                                                                                                                                                                                                                |                                                           |
| 30 |                      |                      |                                                                                                                                                                                                                                                                                                                                                                                |                                                           |
| 31 |                      |                      |                                                                                                                                                                                                                                                                                                                                                                                |                                                           |
| 32 | Interventions:       | <a href="#">#11d</a> | Relevant concomitant care and interventions that are permitted or prohibited during the trial                                                                                                                                                                                                                                                                                  | Detailed in supplementary information file                |
| 33 | concomitant care     |                      |                                                                                                                                                                                                                                                                                                                                                                                |                                                           |
| 34 |                      |                      |                                                                                                                                                                                                                                                                                                                                                                                |                                                           |
| 35 |                      |                      |                                                                                                                                                                                                                                                                                                                                                                                |                                                           |
| 36 |                      |                      |                                                                                                                                                                                                                                                                                                                                                                                |                                                           |
| 37 | Outcomes             | <a href="#">#12</a>  | Primary, secondary, and other outcomes, including the specific measurement variable (eg, systolic blood pressure), analysis metric (eg, change from baseline, final value, time to event), method of aggregation (eg, median, proportion), and time point for each outcome. Explanation of the clinical relevance of chosen efficacy and harm outcomes is strongly recommended | 10                                                        |
| 38 |                      |                      |                                                                                                                                                                                                                                                                                                                                                                                |                                                           |
| 39 |                      |                      |                                                                                                                                                                                                                                                                                                                                                                                |                                                           |
| 40 |                      |                      |                                                                                                                                                                                                                                                                                                                                                                                |                                                           |
| 41 |                      |                      |                                                                                                                                                                                                                                                                                                                                                                                |                                                           |
| 42 |                      |                      |                                                                                                                                                                                                                                                                                                                                                                                |                                                           |
| 43 |                      |                      |                                                                                                                                                                                                                                                                                                                                                                                |                                                           |
| 44 |                      |                      |                                                                                                                                                                                                                                                                                                                                                                                |                                                           |
| 45 |                      |                      |                                                                                                                                                                                                                                                                                                                                                                                |                                                           |
| 46 |                      |                      |                                                                                                                                                                                                                                                                                                                                                                                |                                                           |
| 47 |                      |                      |                                                                                                                                                                                                                                                                                                                                                                                |                                                           |
| 48 |                      |                      |                                                                                                                                                                                                                                                                                                                                                                                |                                                           |
| 49 |                      |                      |                                                                                                                                                                                                                                                                                                                                                                                |                                                           |
| 50 | Participant timeline | <a href="#">#13</a>  | Time schedule of enrolment, interventions (including any run-ins and washouts), assessments, and visits for participants. A schematic diagram is highly recommended (see Figure)                                                                                                                                                                                               | 14                                                        |
| 51 |                      |                      |                                                                                                                                                                                                                                                                                                                                                                                |                                                           |
| 52 |                      |                      |                                                                                                                                                                                                                                                                                                                                                                                |                                                           |
| 53 |                      |                      |                                                                                                                                                                                                                                                                                                                                                                                | Also detailed in supplementary information file, Table S1 |
| 54 |                      |                      |                                                                                                                                                                                                                                                                                                                                                                                |                                                           |
| 55 |                      |                      |                                                                                                                                                                                                                                                                                                                                                                                |                                                           |
| 56 |                      |                      |                                                                                                                                                                                                                                                                                                                                                                                |                                                           |
| 57 |                      |                      |                                                                                                                                                                                                                                                                                                                                                                                |                                                           |
| 58 |                      |                      |                                                                                                                                                                                                                                                                                                                                                                                |                                                           |
| 59 |                      |                      |                                                                                                                                                                                                                                                                                                                                                                                |                                                           |
| 60 |                      |                      |                                                                                                                                                                                                                                                                                                                                                                                |                                                           |

|    |             |                     |                                                    |                  |
|----|-------------|---------------------|----------------------------------------------------|------------------|
| 1  | Sample size | <a href="#">#14</a> | Estimated number of participants needed to achieve | 11               |
| 2  |             |                     | study objectives and how it was determined,        |                  |
| 3  |             |                     | including clinical and statistical assumptions     |                  |
| 4  |             |                     | supporting any sample size calculations            |                  |
| 5  |             |                     |                                                    |                  |
| 6  |             |                     |                                                    |                  |
| 7  |             |                     |                                                    |                  |
| 8  | Recruitment | <a href="#">#15</a> | Strategies for achieving adequate participant      | Detailed in      |
| 9  |             |                     | enrolment to reach target sample size              | supplementary    |
| 10 |             |                     |                                                    | information file |
| 11 |             |                     |                                                    |                  |
| 12 |             |                     |                                                    |                  |

### 13 Methods:

#### 14 Assignment of 15 interventions (for 16 controlled trials)

|    |                      |                      |                                                          |                  |
|----|----------------------|----------------------|----------------------------------------------------------|------------------|
| 19 |                      |                      |                                                          |                  |
| 20 | Allocation: sequence | <a href="#">#16a</a> | Method of generating the allocation sequence (eg,        | 8                |
| 21 | generation           |                      | computer-generated random numbers), and list of          |                  |
| 22 |                      |                      | any factors for stratification. To reduce predictability |                  |
| 23 |                      |                      | of a random sequence, details of any planned             |                  |
| 24 |                      |                      | restriction (eg, blocking) should be provided in a       |                  |
| 25 |                      |                      | separate document that is unavailable to those who       |                  |
| 26 |                      |                      | enrol participants or assign interventions               |                  |
| 27 |                      |                      |                                                          |                  |
| 28 |                      |                      |                                                          |                  |
| 29 |                      |                      |                                                          |                  |
| 30 |                      |                      |                                                          |                  |
| 31 | Allocation           | <a href="#">#16b</a> | Mechanism of implementing the allocation sequence        | 9                |
| 32 | concealment          |                      | (eg, central telephone; sequentially numbered,           |                  |
| 33 | mechanism            |                      | opaque, sealed envelopes), describing any steps to       |                  |
| 34 |                      |                      | conceal the sequence until interventions are assigned    |                  |
| 35 |                      |                      |                                                          |                  |
| 36 |                      |                      |                                                          |                  |
| 37 |                      |                      |                                                          |                  |
| 38 | Allocation:          | <a href="#">#16c</a> | Who will generate the allocation sequence, who will      | 8, 9             |
| 39 | implementation       |                      | enrol participants, and who will assign participants to  |                  |
| 40 |                      |                      | interventions                                            |                  |
| 41 |                      |                      |                                                          |                  |
| 42 |                      |                      |                                                          |                  |
| 43 | Blinding (masking)   | <a href="#">#17a</a> | Who will be blinded after assignment to                  | 9                |
| 44 |                      |                      | interventions (eg, trial participants, care providers,   |                  |
| 45 |                      |                      | outcome assessors, data analysts), and how               |                  |
| 46 |                      |                      |                                                          |                  |
| 47 |                      |                      |                                                          |                  |
| 48 |                      |                      |                                                          |                  |
| 49 | Blinding (masking):  | <a href="#">#17b</a> | If blinded, circumstances under which unblinding is      | Detailed in      |
| 50 | emergency            |                      | permissible, and procedure for revealing a               | supplementary    |
| 51 | unblinding           |                      | participant's allocated intervention during the trial    | information file |
| 52 |                      |                      |                                                          |                  |
| 53 |                      |                      |                                                          |                  |

#### 54 Methods: Data 55 collection, 56 management, and 57 analysis 58 59

|    |                                                  |                      |                                                                                                                                                                                                                                                                                                                                                                                                              |                                                                                                  |
|----|--------------------------------------------------|----------------------|--------------------------------------------------------------------------------------------------------------------------------------------------------------------------------------------------------------------------------------------------------------------------------------------------------------------------------------------------------------------------------------------------------------|--------------------------------------------------------------------------------------------------|
| 1  | Data collection plan                             | <a href="#">#18a</a> | Plans for assessment and collection of outcome, baseline, and other trial data, including any related processes to promote data quality (eg, duplicate measurements, training of assessors) and a description of study instruments (eg, questionnaires, laboratory tests) along with their reliability and validity, if known. Reference to where data collection forms can be found, if not in the protocol | 10.<br>More details in supplementary information file                                            |
| 2  |                                                  |                      |                                                                                                                                                                                                                                                                                                                                                                                                              |                                                                                                  |
| 3  |                                                  |                      |                                                                                                                                                                                                                                                                                                                                                                                                              |                                                                                                  |
| 4  |                                                  |                      |                                                                                                                                                                                                                                                                                                                                                                                                              |                                                                                                  |
| 5  |                                                  |                      |                                                                                                                                                                                                                                                                                                                                                                                                              |                                                                                                  |
| 6  |                                                  |                      |                                                                                                                                                                                                                                                                                                                                                                                                              |                                                                                                  |
| 7  |                                                  |                      |                                                                                                                                                                                                                                                                                                                                                                                                              |                                                                                                  |
| 8  |                                                  |                      |                                                                                                                                                                                                                                                                                                                                                                                                              |                                                                                                  |
| 9  |                                                  |                      |                                                                                                                                                                                                                                                                                                                                                                                                              |                                                                                                  |
| 10 |                                                  |                      |                                                                                                                                                                                                                                                                                                                                                                                                              |                                                                                                  |
| 11 |                                                  |                      |                                                                                                                                                                                                                                                                                                                                                                                                              |                                                                                                  |
| 12 |                                                  |                      |                                                                                                                                                                                                                                                                                                                                                                                                              |                                                                                                  |
| 13 |                                                  |                      |                                                                                                                                                                                                                                                                                                                                                                                                              |                                                                                                  |
| 14 | Data collection plan: retention                  | <a href="#">#18b</a> | Plans to promote participant retention and complete follow-up, including list of any outcome data to be collected for participants who discontinue or deviate from intervention protocols                                                                                                                                                                                                                    | Detailed in supplementary information file                                                       |
| 15 |                                                  |                      |                                                                                                                                                                                                                                                                                                                                                                                                              |                                                                                                  |
| 16 |                                                  |                      |                                                                                                                                                                                                                                                                                                                                                                                                              |                                                                                                  |
| 17 |                                                  |                      |                                                                                                                                                                                                                                                                                                                                                                                                              |                                                                                                  |
| 18 |                                                  |                      |                                                                                                                                                                                                                                                                                                                                                                                                              |                                                                                                  |
| 19 |                                                  |                      |                                                                                                                                                                                                                                                                                                                                                                                                              |                                                                                                  |
| 20 |                                                  |                      |                                                                                                                                                                                                                                                                                                                                                                                                              |                                                                                                  |
| 21 | Data management                                  | <a href="#">#19</a>  | Plans for data entry, coding, security, and storage, including any related processes to promote data quality (eg, double data entry; range checks for data values). Reference to where details of data management procedures can be found, if not in the protocol                                                                                                                                            | 13.<br>More information in the statistical analysis plan found at <a href="#">ISRCTN60517191</a> |
| 22 |                                                  |                      |                                                                                                                                                                                                                                                                                                                                                                                                              |                                                                                                  |
| 23 |                                                  |                      |                                                                                                                                                                                                                                                                                                                                                                                                              |                                                                                                  |
| 24 |                                                  |                      |                                                                                                                                                                                                                                                                                                                                                                                                              |                                                                                                  |
| 25 |                                                  |                      |                                                                                                                                                                                                                                                                                                                                                                                                              |                                                                                                  |
| 26 |                                                  |                      |                                                                                                                                                                                                                                                                                                                                                                                                              |                                                                                                  |
| 27 |                                                  |                      |                                                                                                                                                                                                                                                                                                                                                                                                              |                                                                                                  |
| 28 |                                                  |                      |                                                                                                                                                                                                                                                                                                                                                                                                              |                                                                                                  |
| 29 |                                                  |                      |                                                                                                                                                                                                                                                                                                                                                                                                              |                                                                                                  |
| 30 |                                                  |                      |                                                                                                                                                                                                                                                                                                                                                                                                              |                                                                                                  |
| 31 | Statistics: outcomes                             | <a href="#">#20a</a> | Statistical methods for analysing primary and secondary outcomes. Reference to where other details of the statistical analysis plan can be found, if not in the protocol                                                                                                                                                                                                                                     | 13.<br>More information in the statistical analysis plan found at <a href="#">ISRCTN60517191</a> |
| 32 |                                                  |                      |                                                                                                                                                                                                                                                                                                                                                                                                              |                                                                                                  |
| 33 |                                                  |                      |                                                                                                                                                                                                                                                                                                                                                                                                              |                                                                                                  |
| 34 |                                                  |                      |                                                                                                                                                                                                                                                                                                                                                                                                              |                                                                                                  |
| 35 |                                                  |                      |                                                                                                                                                                                                                                                                                                                                                                                                              |                                                                                                  |
| 36 |                                                  |                      |                                                                                                                                                                                                                                                                                                                                                                                                              |                                                                                                  |
| 37 |                                                  |                      |                                                                                                                                                                                                                                                                                                                                                                                                              |                                                                                                  |
| 38 |                                                  |                      |                                                                                                                                                                                                                                                                                                                                                                                                              |                                                                                                  |
| 39 |                                                  |                      |                                                                                                                                                                                                                                                                                                                                                                                                              |                                                                                                  |
| 40 | Statistics: additional analyses                  | <a href="#">#20b</a> | Methods for any additional analyses (eg, subgroup and adjusted analyses)                                                                                                                                                                                                                                                                                                                                     | 11.<br>More information in the statistical analysis plan found at <a href="#">ISRCTN60517191</a> |
| 41 |                                                  |                      |                                                                                                                                                                                                                                                                                                                                                                                                              |                                                                                                  |
| 42 |                                                  |                      |                                                                                                                                                                                                                                                                                                                                                                                                              |                                                                                                  |
| 43 |                                                  |                      |                                                                                                                                                                                                                                                                                                                                                                                                              |                                                                                                  |
| 44 |                                                  |                      |                                                                                                                                                                                                                                                                                                                                                                                                              |                                                                                                  |
| 45 |                                                  |                      |                                                                                                                                                                                                                                                                                                                                                                                                              |                                                                                                  |
| 46 |                                                  |                      |                                                                                                                                                                                                                                                                                                                                                                                                              |                                                                                                  |
| 47 |                                                  |                      |                                                                                                                                                                                                                                                                                                                                                                                                              |                                                                                                  |
| 48 |                                                  |                      |                                                                                                                                                                                                                                                                                                                                                                                                              |                                                                                                  |
| 49 | Statistics: analysis population and missing data | <a href="#">#20c</a> | Definition of analysis population relating to protocol non-adherence (eg, as randomised analysis), and any statistical methods to handle missing data (eg, multiple imputation)                                                                                                                                                                                                                              | Information in the statistical analysis plan found at <a href="#">ISRCTN60517191</a>             |
| 50 |                                                  |                      |                                                                                                                                                                                                                                                                                                                                                                                                              |                                                                                                  |
| 51 |                                                  |                      |                                                                                                                                                                                                                                                                                                                                                                                                              |                                                                                                  |
| 52 |                                                  |                      |                                                                                                                                                                                                                                                                                                                                                                                                              |                                                                                                  |
| 53 |                                                  |                      |                                                                                                                                                                                                                                                                                                                                                                                                              |                                                                                                  |
| 54 |                                                  |                      |                                                                                                                                                                                                                                                                                                                                                                                                              |                                                                                                  |

## Methods: Monitoring

|    |                      |                      |                                                          |                  |
|----|----------------------|----------------------|----------------------------------------------------------|------------------|
| 1  | Data monitoring:     | <a href="#">#21a</a> | Composition of data monitoring committee (DMC);          | Detailed in      |
| 2  | formal committee     |                      | summary of its role and reporting structure;             | supplementary    |
| 3  |                      |                      | statement of whether it is independent from the          | information file |
| 4  |                      |                      | sponsor and competing interests; and reference to        |                  |
| 5  |                      |                      | where further details about its charter can be found,    |                  |
| 6  |                      |                      | if not in the protocol. Alternatively, an explanation of |                  |
| 7  |                      |                      | why a DMC is not needed                                  |                  |
| 8  |                      |                      |                                                          |                  |
| 9  |                      |                      |                                                          |                  |
| 10 |                      |                      |                                                          |                  |
| 11 |                      |                      |                                                          |                  |
| 12 | Data monitoring:     | <a href="#">#21b</a> | Description of any interim analyses and stopping         | Detailed in      |
| 13 | interim analysis     |                      | guidelines, including who will have access to these      | supplementary    |
| 14 |                      |                      | interim results and make the final decision to           | information file |
| 15 |                      |                      | terminate the trial                                      |                  |
| 16 |                      |                      |                                                          |                  |
| 17 |                      |                      |                                                          |                  |
| 18 |                      |                      |                                                          |                  |
| 19 | Harms                | <a href="#">#22</a>  | Plans for collecting, assessing, reporting, and          | Detailed in      |
| 20 |                      |                      | managing solicited and spontaneously reported            | supplementary    |
| 21 |                      |                      | adverse events and other unintended effects of trial     | information file |
| 22 |                      |                      | interventions or trial conduct                           |                  |
| 23 |                      |                      |                                                          |                  |
| 24 |                      |                      |                                                          |                  |
| 25 |                      |                      |                                                          |                  |
| 26 | Auditing             | <a href="#">#23</a>  | Frequency and procedures for auditing trial conduct,     | Detailed in      |
| 27 |                      |                      | if any, and whether the process will be independent      | supplementary    |
| 28 |                      |                      | from investigators and the sponsor                       | information file |
| 29 |                      |                      |                                                          |                  |
| 30 |                      |                      |                                                          |                  |
| 31 | <b>Ethics and</b>    |                      |                                                          |                  |
| 32 | <b>dissemination</b> |                      |                                                          |                  |
| 33 |                      |                      |                                                          |                  |
| 34 |                      |                      |                                                          |                  |
| 35 | Research ethics      | <a href="#">#24</a>  | Plans for seeking research ethics committee /            | 12               |
| 36 | approval             |                      | institutional review board (REC / IRB) approval          |                  |
| 37 |                      |                      |                                                          |                  |
| 38 |                      |                      |                                                          |                  |
| 39 | Protocol             | <a href="#">#25</a>  | Plans for communicating important protocol               | 11               |
| 40 | amendments           |                      | modifications (eg, changes to eligibility criteria,      |                  |
| 41 |                      |                      | outcomes, analyses) to relevant parties (eg,             |                  |
| 42 |                      |                      | investigators, REC / IRBs, trial participants, trial     |                  |
| 43 |                      |                      | registries, journals, regulators)                        |                  |
| 44 |                      |                      |                                                          |                  |
| 45 |                      |                      |                                                          |                  |
| 46 |                      |                      |                                                          |                  |
| 47 | Consent or assent    | <a href="#">#26a</a> | Who will obtain informed consent or assent from          | 12.              |
| 48 |                      |                      | potential trial participants or authorised surrogates,   |                  |
| 49 |                      |                      | and how (see Item 32)                                    |                  |
| 50 |                      |                      |                                                          | Also detailed in |
| 51 |                      |                      |                                                          | supplementary    |
| 52 |                      |                      |                                                          | information file |
| 53 |                      |                      |                                                          |                  |
| 54 |                      |                      |                                                          |                  |
| 55 | Consent or assent:   | <a href="#">#26b</a> | Additional consent provisions for collection and use     | Detailed in      |
| 56 | ancillary studies    |                      | of participant data and biological specimens in          | supplementary    |
| 57 |                      |                      | ancillary studies, if applicable                         | information file |
| 58 |                      |                      |                                                          |                  |
| 59 |                      |                      |                                                          |                  |
| 60 |                      |                      |                                                          |                  |



|    |                                             |                      |                                                                                                                                                                                                                                                                                     |                                            |
|----|---------------------------------------------|----------------------|-------------------------------------------------------------------------------------------------------------------------------------------------------------------------------------------------------------------------------------------------------------------------------------|--------------------------------------------|
| 1  | Confidentiality                             | <a href="#">#27</a>  | How personal information about potential and enrolled participants will be collected, shared, and maintained in order to protect confidentiality before, during, and after the trial                                                                                                | Detailed in supplementary information file |
| 2  |                                             |                      |                                                                                                                                                                                                                                                                                     |                                            |
| 3  |                                             |                      |                                                                                                                                                                                                                                                                                     |                                            |
| 4  |                                             |                      |                                                                                                                                                                                                                                                                                     |                                            |
| 5  |                                             |                      |                                                                                                                                                                                                                                                                                     |                                            |
| 6  |                                             |                      |                                                                                                                                                                                                                                                                                     |                                            |
| 7  |                                             |                      |                                                                                                                                                                                                                                                                                     |                                            |
| 8  | Declaration of interests                    | <a href="#">#28</a>  | Financial and other competing interests for principal investigators for the overall trial and each study site                                                                                                                                                                       | 15                                         |
| 9  |                                             |                      |                                                                                                                                                                                                                                                                                     |                                            |
| 10 |                                             |                      |                                                                                                                                                                                                                                                                                     |                                            |
| 11 | Data access                                 | <a href="#">#29</a>  | Statement of who will have access to the final trial dataset, and disclosure of contractual agreements that limit such access for investigators                                                                                                                                     | n/a                                        |
| 12 |                                             |                      |                                                                                                                                                                                                                                                                                     |                                            |
| 13 |                                             |                      |                                                                                                                                                                                                                                                                                     |                                            |
| 14 |                                             |                      |                                                                                                                                                                                                                                                                                     |                                            |
| 15 |                                             |                      |                                                                                                                                                                                                                                                                                     |                                            |
| 16 |                                             |                      |                                                                                                                                                                                                                                                                                     |                                            |
| 17 | Ancillary and post trial care               | <a href="#">#30</a>  | Provisions, if any, for ancillary and post-trial care, and for compensation to those who suffer harm from trial participation                                                                                                                                                       | Detailed in supplementary information file |
| 18 |                                             |                      |                                                                                                                                                                                                                                                                                     |                                            |
| 19 |                                             |                      |                                                                                                                                                                                                                                                                                     |                                            |
| 20 |                                             |                      |                                                                                                                                                                                                                                                                                     |                                            |
| 21 |                                             |                      |                                                                                                                                                                                                                                                                                     |                                            |
| 22 | Dissemination policy: trial results         | <a href="#">#31a</a> | Plans for investigators and sponsor to communicate trial results to participants, healthcare professionals, the public, and other relevant groups (eg, via publication, reporting in results databases, or other data sharing arrangements), including any publication restrictions | 2, 13                                      |
| 23 |                                             |                      |                                                                                                                                                                                                                                                                                     |                                            |
| 24 |                                             |                      |                                                                                                                                                                                                                                                                                     |                                            |
| 25 |                                             |                      |                                                                                                                                                                                                                                                                                     |                                            |
| 26 |                                             |                      |                                                                                                                                                                                                                                                                                     |                                            |
| 27 |                                             |                      |                                                                                                                                                                                                                                                                                     |                                            |
| 28 |                                             |                      |                                                                                                                                                                                                                                                                                     |                                            |
| 29 |                                             |                      |                                                                                                                                                                                                                                                                                     |                                            |
| 30 |                                             |                      |                                                                                                                                                                                                                                                                                     |                                            |
| 31 |                                             |                      |                                                                                                                                                                                                                                                                                     |                                            |
| 32 | Dissemination policy: authorship            | <a href="#">#31b</a> | Authorship eligibility guidelines and any intended use of professional writers                                                                                                                                                                                                      | n/a                                        |
| 33 |                                             |                      |                                                                                                                                                                                                                                                                                     |                                            |
| 34 |                                             |                      |                                                                                                                                                                                                                                                                                     |                                            |
| 35 |                                             |                      |                                                                                                                                                                                                                                                                                     |                                            |
| 36 | Dissemination policy: reproducible research | <a href="#">#31c</a> | Plans, if any, for granting public access to the full protocol, participant-level dataset, and statistical code                                                                                                                                                                     | 13                                         |
| 37 |                                             |                      |                                                                                                                                                                                                                                                                                     |                                            |
| 38 |                                             |                      |                                                                                                                                                                                                                                                                                     |                                            |
| 39 |                                             |                      |                                                                                                                                                                                                                                                                                     |                                            |
| 40 |                                             |                      |                                                                                                                                                                                                                                                                                     |                                            |
| 41 | <b>Appendices</b>                           |                      |                                                                                                                                                                                                                                                                                     |                                            |
| 42 |                                             |                      |                                                                                                                                                                                                                                                                                     |                                            |
| 43 | Informed consent materials                  | <a href="#">#32</a>  | Model consent form and other related documentation given to participants and authorised surrogates                                                                                                                                                                                  | Supplementary files provided               |
| 44 |                                             |                      |                                                                                                                                                                                                                                                                                     |                                            |
| 45 |                                             |                      |                                                                                                                                                                                                                                                                                     |                                            |
| 46 |                                             |                      |                                                                                                                                                                                                                                                                                     |                                            |
| 47 | Biological specimens                        | <a href="#">#33</a>  | Plans for collection, laboratory evaluation, and storage of biological specimens for genetic or molecular analysis in the current trial and for future use in ancillary studies, if applicable                                                                                      | n/a                                        |
| 48 |                                             |                      |                                                                                                                                                                                                                                                                                     |                                            |
| 49 |                                             |                      |                                                                                                                                                                                                                                                                                     |                                            |
| 50 |                                             |                      |                                                                                                                                                                                                                                                                                     |                                            |
| 51 |                                             |                      |                                                                                                                                                                                                                                                                                     |                                            |
| 52 |                                             |                      |                                                                                                                                                                                                                                                                                     |                                            |
| 53 |                                             |                      |                                                                                                                                                                                                                                                                                     |                                            |

None The SPIRIT checklist is distributed under the terms of the Creative Commons Attribution License CC-BY-ND 3.0. This checklist can be completed online using <https://www.goodreports.org/>, a tool made by the [EQUATOR Network](#) in collaboration with [Penelope.ai](#)

# BMJ Open

**The effect of intensive treatment for schistosomiasis on immune responses to vaccines among rural Ugandan island adolescents: randomised controlled trial protocol A for the 'POPulation differences in VACcine responses' (POPVAC) programme**

|                               |                                                                                                                                                                                                                                                                                                                                                                                                                                                                                                                                                                                                                                                                                                                                                                                                                                                                                                                                                                                                                                                                                                                                                                                                                                                                                                                                                                                                                                                                                                                                                                                                                                                                                                                                                                                                                                                                                                                                                                                               |
|-------------------------------|-----------------------------------------------------------------------------------------------------------------------------------------------------------------------------------------------------------------------------------------------------------------------------------------------------------------------------------------------------------------------------------------------------------------------------------------------------------------------------------------------------------------------------------------------------------------------------------------------------------------------------------------------------------------------------------------------------------------------------------------------------------------------------------------------------------------------------------------------------------------------------------------------------------------------------------------------------------------------------------------------------------------------------------------------------------------------------------------------------------------------------------------------------------------------------------------------------------------------------------------------------------------------------------------------------------------------------------------------------------------------------------------------------------------------------------------------------------------------------------------------------------------------------------------------------------------------------------------------------------------------------------------------------------------------------------------------------------------------------------------------------------------------------------------------------------------------------------------------------------------------------------------------------------------------------------------------------------------------------------------------|
| Journal:                      | <i>BMJ Open</i>                                                                                                                                                                                                                                                                                                                                                                                                                                                                                                                                                                                                                                                                                                                                                                                                                                                                                                                                                                                                                                                                                                                                                                                                                                                                                                                                                                                                                                                                                                                                                                                                                                                                                                                                                                                                                                                                                                                                                                               |
| Manuscript ID                 | bmjopen-2020-040426.R3                                                                                                                                                                                                                                                                                                                                                                                                                                                                                                                                                                                                                                                                                                                                                                                                                                                                                                                                                                                                                                                                                                                                                                                                                                                                                                                                                                                                                                                                                                                                                                                                                                                                                                                                                                                                                                                                                                                                                                        |
| Article Type:                 | Protocol                                                                                                                                                                                                                                                                                                                                                                                                                                                                                                                                                                                                                                                                                                                                                                                                                                                                                                                                                                                                                                                                                                                                                                                                                                                                                                                                                                                                                                                                                                                                                                                                                                                                                                                                                                                                                                                                                                                                                                                      |
| Date Submitted by the Author: | 09-Dec-2020                                                                                                                                                                                                                                                                                                                                                                                                                                                                                                                                                                                                                                                                                                                                                                                                                                                                                                                                                                                                                                                                                                                                                                                                                                                                                                                                                                                                                                                                                                                                                                                                                                                                                                                                                                                                                                                                                                                                                                                   |
| Complete List of Authors:     | Nkurunungi, Gyaviira; MRC/UVRI and LSHTM Uganda Research Unit, Immunomodulation and Vaccines Programme<br>Zirimenya , Ludoviko ; MRC/UVRI and LSHTM Uganda Research Unit, Immunomodulation and Vaccines Programme<br>Nassuuna , Jacent; MRC/UVRI and LSHTM Uganda Research Unit, Immunomodulation and Vaccines Programme<br>Natukunda , Agnes ; MRC/UVRI and LSHTM Uganda Research Unit, Immunomodulation and Vaccines Programme<br>Kabuubi , Prossy ; MRC/UVRI and LSHTM Uganda Research Unit, Immunomodulation and Vaccines Programme<br>Niwagaba , Emmanuel ; MRC/UVRI and LSHTM Uganda Research Unit, Immunomodulation and Vaccines Programme<br>Oduru, Gloria; MRC/UVRI and LSHTM Uganda Research Unit, Immunomodulation and Vaccines Programme<br>Kabami , Grace ; MRC/UVRI and LSHTM Uganda Research Unit, Immunomodulation and Vaccines Programme<br>Amongin , Rebecca ; MRC/UVRI and LSHTM Uganda Research Unit, Immunomodulation and Vaccines Programme<br>Mutebe , Alex ; MRC/UVRI and LSHTM Uganda Research Unit, Immunomodulation and Vaccines Programme<br>Namutebi , Milly ; MRC/UVRI and LSHTM Uganda Research Unit, Immunomodulation and Vaccines Programme<br>Zziwa , Christopher ; MRC/UVRI and LSHTM Uganda Research Unit, Immunomodulation and Vaccines Programme<br>Amongi, Susan; MRC/UVRI and LSHTM Uganda Research Unit, Immunomodulation and Vaccines Programme<br>Ninsiima , Caroline ; MRC/UVRI and LSHTM Uganda Research Unit, Immunomodulation and Vaccines Programme<br>Onen, Caroline; MRC/UVRI and LSHTM Uganda Research Unit, Immunomodulation and Vaccines Programme<br>Akello , Florence ; MRC/UVRI and LSHTM Uganda Research Unit, Immunomodulation and Vaccines Programme<br>Sewankambo, Moses; MRC/UVRI and LSHTM Uganda Research Unit, Immunomodulation and Vaccines Programme<br>Kiwankambo, Samuel; MRC/UVRI and LSHTM Uganda Research Unit, Immunomodulation and Vaccines Programme<br>Kizindo , Robert ; MRC/UVRI and LSHTM Uganda Research Unit, |

|                                   |                                                                                                                                                                                                                                                                                                                                                                                                                                                                                                                                                                                                                                                                   |
|-----------------------------------|-------------------------------------------------------------------------------------------------------------------------------------------------------------------------------------------------------------------------------------------------------------------------------------------------------------------------------------------------------------------------------------------------------------------------------------------------------------------------------------------------------------------------------------------------------------------------------------------------------------------------------------------------------------------|
|                                   | <p>Immunomodulation and Vaccines Programme<br/> Kaweesa, James; Republic of Uganda Ministry of Health, Vector Control Division<br/> Cose, Stephen; MRC/UVRI and LSHTM Uganda Research Unit, Immunomodulation and Vaccines Programme; London School of Hygiene and Tropical Medicine Department of Clinical Research<br/> Webb, Emily; London School of Hygiene &amp; Tropical Medicine, MRC Tropical Epidemiology Group, Department of Infectious Disease Epidemiology<br/> Elliott, Alison; MRC/UVRI and LSHTM Uganda Research Unit, Immunomodulation and Vaccines Programme; London School of Hygiene and Tropical Medicine Department of Clinical Research</p> |
| <b>Primary Subject Heading:</b>   | Infectious diseases                                                                                                                                                                                                                                                                                                                                                                                                                                                                                                                                                                                                                                               |
| <b>Secondary Subject Heading:</b> | Epidemiology, Immunology (including allergy), Public health                                                                                                                                                                                                                                                                                                                                                                                                                                                                                                                                                                                                       |
| <b>Keywords:</b>                  | Infection control < INFECTIOUS DISEASES, PARASITOLOGY, Public health < INFECTIOUS DISEASES, Immunology < TROPICAL MEDICINE, Epidemiology < TROPICAL MEDICINE, Paediatric infectious disease & immunisation < PAEDIATRICS                                                                                                                                                                                                                                                                                                                                                                                                                                          |
|                                   |                                                                                                                                                                                                                                                                                                                                                                                                                                                                                                                                                                                                                                                                   |

SCHOLARONE™  
Manuscripts



I, the Submitting Author has the right to grant and does grant on behalf of all authors of the Work (as defined in the below author licence), an exclusive licence and/or a non-exclusive licence for contributions from authors who are: i) UK Crown employees; ii) where BMJ has agreed a CC-BY licence shall apply, and/or iii) in accordance with the terms applicable for US Federal Government officers or employees acting as part of their official duties; on a worldwide, perpetual, irrevocable, royalty-free basis to BMJ Publishing Group Ltd ("BMJ") its licensees and where the relevant Journal is co-owned by BMJ to the co-owners of the Journal, to publish the Work in this journal and any other BMJ products and to exploit all rights, as set out in our [licence](#).

The Submitting Author accepts and understands that any supply made under these terms is made by BMJ to the Submitting Author unless you are acting as an employee on behalf of your employer or a postgraduate student of an affiliated institution which is paying any applicable article publishing charge ("APC") for Open Access articles. Where the Submitting Author wishes to make the Work available on an Open Access basis (and intends to pay the relevant APC), the terms of reuse of such Open Access shall be governed by a Creative Commons licence – details of these licences and which [Creative Commons](#) licence will apply to this Work are set out in our licence referred to above.

Other than as permitted in any relevant BMJ Author's Self Archiving Policies, I confirm this Work has not been accepted for publication elsewhere, is not being considered for publication elsewhere and does not duplicate material already published. I confirm all authors consent to publication of this Work and authorise the granting of this licence.

1  
2  
3 1 **The effect of intensive treatment for schistosomiasis on immune responses to vaccines among**  
4 **rural Ugandan island adolescents: randomised controlled trial protocol A for the ‘POPulation**  
5 **differences in VACCine responses’ (POPVAC) programme**  
6  
7

8  
9 4 Gyaviira Nkurunungi<sup>1,¶,\*</sup>, Ludoviko Zirimenya<sup>1,¶</sup>, Jacent Nassuuna<sup>1,¶</sup>, Agnes Natukunda<sup>1,¶</sup>, Prossy N  
10 Kabuubi<sup>1</sup>, Emmanuel Niwagaba<sup>1</sup>, Gloria Oduru<sup>1</sup>, Grace Kabami<sup>1</sup>, Rebecca Amongin<sup>1</sup>, Alex Mutebe<sup>1</sup>,  
11 Milly Namutebi<sup>1</sup>, Christopher Zziwa<sup>1</sup>, Susan Amongi<sup>1</sup>, Caroline Ninsiima<sup>1</sup>, Caroline Onen<sup>1</sup>, Florence  
12 Akello<sup>1</sup>, Moses Sewankambo<sup>1</sup>, Samuel Kiwanuka<sup>1</sup>, Robert Kizindo<sup>1</sup>, James Kaweesa<sup>2</sup>, Stephen Cose<sup>1,3</sup>,  
13 Emily L Webb<sup>4</sup>, Alison M Elliott<sup>1,3</sup> **for the POPVAC trial team**  
14  
15  
16  
17  
18  
19

20 10 <sup>1</sup>Immunomodulation and Vaccines Programme, Medical Research Council/Uganda Virus Research  
21 Institute and London School of Hygiene and Tropical Medicine (MRC/UVRI and LSHTM) Uganda  
22  
23 12 Research Unit, Entebbe, Uganda

24  
25 13 <sup>2</sup>Vector Control Division, Ministry of Health, Kampala, Uganda

26  
27 14 <sup>3</sup>Department of Clinical Research, London School of Hygiene and Tropical Medicine, London, United  
28 Kingdom  
29

30  
31 16 <sup>4</sup>MRC Tropical Epidemiology Group, Department of Infectious Disease Epidemiology, London School  
32 of Hygiene and Tropical Medicine, London, United Kingdom  
33

34  
35 18 <sup>¶</sup>These authors contributed equally

36  
37 19 **\*Correspondence:** Gyaviira Nkurunungi; [Gyaviira.Nkurunungi@mrcuganda.org](mailto:Gyaviira.Nkurunungi@mrcuganda.org)  
38  
39  
40  
41  
42  
43  
44  
45  
46  
47  
48  
49  
50  
51  
52  
53  
54  
55  
56  
57  
58  
59  
60

1  
2  
3 **20 Abstract**  
4

5 **21 Introduction**  
6

7  
8 Several licensed and investigational vaccines have lower efficacy, and induce impaired immune  
9  
10 responses, in low-income versus high-income countries and in rural, versus urban, settings.  
11  
12 Understanding these population differences is essential to optimising vaccine effectiveness in the  
13  
14 tropics. We suggest that repeated exposure to and immunomodulation by chronic helminth  
15  
16 infections partly explains population differences in vaccine response.  
17

18 **27 Methods and analysis**  
19

20  
21 We have designed an individually randomised, parallel group trial of intensive versus standard  
22  
23 praziquantel (PZQ) intervention against schistosomiasis, to determine effects on vaccine response  
24  
25 outcomes among school-going adolescents (9 to 17 years) from rural *Schistosoma mansoni* (*Sm*)-  
26  
27 endemic Ugandan islands. Vaccines to be studied comprise BCG on day 'zero'; yellow fever, oral  
28  
29 typhoid and Human Papilloma Virus (HPV) vaccines at week 4; and HPV and Tetanus/diphtheria  
30  
31 booster vaccine at week 28. The intensive arm will receive PZQ doses three times, each two weeks  
32  
33 apart, before BCG immunisation, followed by a dose at week 8 and quarterly thereafter. The  
34  
35 standard arm will receive PZQ at week 8 and week 52. We expect to enrol 480 participants, with 80%  
36  
37 *Sm* infected at the outset.

38  
39 Primary outcomes are BCG-specific IFN- $\gamma$  ELISpot responses eight weeks after BCG immunisation and  
40  
41 for other vaccines, antibody responses to key vaccine antigens at four weeks after immunisation.  
42  
43 Secondary analyses will determine effects of intensive anthelmintic treatment on correlates of  
44  
45 protective immunity, on vaccine response waning, on priming vs boosting immunisations, and on *Sm*  
46  
47 infection status and intensity. Exploratory immunology assays using archived samples will enable  
48  
49 assessment of mechanistic links between helminths and vaccine responses.  
50

51 **43 Ethics and dissemination**  
52

53  
54 Ethics approval has been obtained from relevant Ugandan and UK ethics committees. Results will be  
55  
56 shared with Uganda Ministry of Health, relevant district councils, community leaders and study  
57  
58 participants. Further dissemination will be done through conference proceedings and publications.  
59

60 **47 Trial registration**

48 Current Controlled Trials identifier: ISRCTN60517191.  
49  
50  
51  
52  
53  
54  
55  
56  
57  
58  
59  
60



1  
2  
3 50 **Article summary**  
4

5 51 *Strengths and limitations of this study*  
6

- 7 52
- 8 • This will be the first adequately powered intervention study to investigate effects of  
9 schistosomiasis treatment on vaccine responses in adolescents.  
10
  - 11 54 • Effects on both live-attenuated and inert vaccines will be studied.  
12
  - 13 55 • Our strong immunoepidemiological design and nested immunological studies will address  
14 specific hypotheses regarding pathways of effects.  
15
  - 16 57 • The sample archives developed will provide a major asset for exploration of new leads  
17 arising from this hypothesis-driven work, or for an alternative, “systems biology” approach  
18 58 investigating (for example) transcriptome, microbiome and virome.  
19 59
  - 20 60 • Even with intensive anthelmintic intervention, it may be difficult to “successfully” treat  
21 61 *Schistosoma* infection in our endemic setting due to re-infections; however, we still expect a  
22 62 substantial difference in intensity between the two trial arms.  
23  
24  
25  
26

27 63  
28 64 **Word count**  
29

30 65 3347  
31

32 66 **Keywords**  
33

34 67 Vaccine; Schistosomiasis; Praziquantel; Immunization  
35  
36  
37  
38  
39  
40  
41  
42  
43  
44  
45  
46  
47  
48  
49  
50  
51  
52  
53  
54  
55  
56  
57  
58  
59  
60

## 68 Introduction

69 Vaccine-specific immune responses are often impaired, and vaccine efficacy and effectiveness lower,  
70 in tropical low-income countries (LICs) compared to temperate high-income countries and in rural,  
71 compared to urban, LIC settings.<sup>1-8</sup> This has been recognised for both live vaccines (such as BCG,<sup>2,3,5,9</sup>  
72 polio,<sup>1</sup> yellow fever<sup>4</sup> vaccines) and non-live vaccines (such as influenza<sup>10</sup> and tetanus<sup>11</sup>).

73 Investigational malaria<sup>7</sup> and viral-vectored tuberculosis<sup>6</sup> and Ebola<sup>12</sup> vaccines are also affected.

74 Previous exposure to the target pathogen (or related organisms) may mask the benefit of the  
75 vaccine.<sup>13,14</sup> However, pre-vaccination exposure does not explain why Ebola trial vaccine-specific

76 responses differ between healthy UK and Senegalese adults,<sup>12</sup> as the target organism is rare.

77 Therefore, environmentally-dependent mechanisms may play an important role.<sup>5</sup>

78 A long-held hypothesis is that parasites, particularly helminths, modulate vaccine responses through

79 profound pre- and post-immunisation bystander effects on immunological activation and

80 regulation.<sup>15-17</sup> Helminths might also impact vaccines responses through interactions with the

81 complex ecosystem of mammalian gut bacteria, fungi, protozoa and viruses (the “trans-kingdom”

82 concept<sup>18</sup> detailed elsewhere in this journal [bmjopen-2020-040425]). Helminth-induced gut mucosa

83 damage, the associated translocation of microbial products into the systemic circulation<sup>19-21</sup> and

84 systemic immune activation or regulation mediated by microbial products might contribute to

85 modulation of responses to vaccines and other infections.

86 Helminth-mediated modulation of vaccine responses has not been substantiated in human

87 populations. No appropriately powered trials have been conducted to evaluate reversibility of their

88 effects. In animal models, helminths generally impair priming and accelerate waning of vaccine

89 responses, although effects vary with helminth species, vaccine type and the timing of infection and

90 immunisation.<sup>22</sup> Most observational studies in humans also suggest suppressed or biased responses

91 during helminth infection, especially during systemic infections, such as schistosomiasis and the

92 filariases. There is modest evidence that treating geohelminths in humans improves responses to

93 BCG<sup>23,24</sup> or oral cholera vaccine<sup>25</sup> and we found that schistosomiasis treatment improved the

94 measles-booster response in pre-school children.<sup>26</sup> There is therefore a strong case for a

95 comprehensive assessment of the effects of helminths and their treatment on vaccine responses.

96 The extent to which helminths and related “trans-kingdom” mediators causally and reversibly

97 impact immunological characteristics associated with vaccine responses may best be determined by

98 intervention studies. This trial protocol A of the ‘Population differences in Vaccine responses’

99 programme (POPVAC A; Current Controlled Trials identifier: ISRCTN60517191) has been designed to

100 evaluate the effect of *Schistosoma mansoni* and its treatment on vaccine responses. This study is

1  
2  
3  
4  
5  
6  
7  
8  
9  
10  
11  
12  
13  
14  
15  
16  
17  
18  
19  
20  
21  
22  
23  
24  
25  
26  
27  
28  
29  
30  
31  
32  
33  
34  
35  
36  
37  
38  
39  
40  
41  
42  
43  
44  
45  
46  
47  
48  
49  
50  
51  
52  
53  
54  
55  
56  
57  
58  
59  
60

101 one of three parallel trials whose designs and cross-cutting analyses are described separately in this  
102 journal (bmjopen-2020-040425, bmjopen-2020-040427 and bmjopen-2020-040430).

For peer review only

1  
2  
3 103 **Hypothesis**  
4

5 104 The overarching goal of the POPVAC programme is to understand population differences in vaccine  
6  
7 105 responses in Uganda, in order to identify strategies through which vaccine effectiveness can be  
8  
9 106 optimised for the low-income, tropical settings where they are especially needed. For this Trial A, we  
10  
11 107 focus on the hypothesis that *Schistosoma mansoni* infection suppresses responses to unrelated  
12  
13 108 vaccines; and that this effect can be reversed, at least in part, by intensive praziquantel treatment  
14  
15 109 intervention.

16 110 **Objective**

17  
18 111 To determine whether there are reversible effects of chronic *Schistosoma mansoni* infection on  
19  
20 112 vaccine response in adolescents, using an intervention study.  
21  
22  
23  
24  
25  
26  
27  
28  
29  
30  
31  
32  
33  
34  
35  
36  
37  
38  
39  
40  
41  
42  
43  
44  
45  
46  
47  
48  
49  
50  
51  
52  
53  
54  
55  
56  
57  
58  
59  
60

## 113 **Methods and analysis**

### 114 ***Setting and participants***

115 SPIRIT reporting guidelines<sup>27</sup> have been used. We will conduct an individually randomised, parallel  
116 group trial of intensive versus standard intervention against schistosomiasis (described below) in the  
117 *S. mansoni*-endemic Koome islands of Lake Victoria, Mukono district, Uganda.<sup>28</sup> We aim to enroll 480  
118 participants, randomising 240 to each intervention arm. The study cohort will recruit participants  
119 aged 9 to 17 years in primary school years 1 to 6. Adolescents<sup>29</sup> in this study setting bear a heavy  
120 parasite burden.<sup>30</sup> In addition, this age-group is a target group for vaccines against sexually  
121 transmitted infections (currently human papilloma virus [HPV] – in future, it is hoped, for vaccines  
122 against HIV) and for booster immunisations.

### 123 ***Recruitment criteria***

#### 124 *Inclusion criteria*

- 125 i. Attending the selected school and planning to continue to attend the school for the duration  
126 of the study
- 127 ii. Aged 9 to 17 years and enrolled in primary 1 to 6 (to avoid primary leaving examinations in  
128 late year 7, and loss to follow up of children leaving after primary 7)
- 129 iii. Written informed assent by participant and consent by parent or guardian
- 130 iv. Females agree to avoid pregnancy for the duration of the trial
- 131 v. Willing to provide locator information and to be contacted during the course of the trial
- 132 vi. Able and willing (in the investigator's opinion) to comply with all the study requirements

#### 133 *Exclusion criteria*

- 134 i. Clinically significant history of immunodeficiency (including HIV), cancer, cardiovascular  
135 disease, gastrointestinal disease, liver disease, renal disease, endocrine disorder and  
136 neurological illness
- 137 ii. History of serious psychiatric condition or disorder
- 138 iii. Moderate or severe acute illness characterised by any of the following symptoms: fever,  
139 impaired consciousness, convulsions, difficulty in breathing, vomiting; or as otherwise  
140 determined by the attending project clinician.
- 141 iv. Concurrent oral or systemic steroid medication or the concurrent use of other  
142 immunosuppressive agents within 2 months prior to enrolment
- 143 v. History of allergic reaction to immunisation or any allergy likely to be exacerbated by any  
144 component of the study vaccines including egg or chicken proteins

- 1  
2  
3 145 vi. History of previous immunisation with Yellow Fever (YF), oral typhoid or Human Papillomavirus  
4 146 (HPV) vaccine; previous immunisation with BCG or Tetanus and diphtheria vaccine (Td) at age  
5 147  $\geq 5$  years  
6  
7  
8 148 vii. Tendency to develop keloid scars  
9  
10 149 viii. Haemoglobin less than 82g/L  
11  
12 150 ix. Positive HIV serology  
13  
14 151 x. Positive pregnancy test  
15 152 xi. Female currently lactating, confirmed pregnancy or intention to become pregnant during the  
16 153 trial period  
17  
18 154 xii. Use of an investigational medicinal product or non-registered drug, live vaccine, or medical  
19 155 device other than the study vaccines for 30 days prior to dosing with the study vaccine, or  
20 156 planned use during the study period  
21  
22 157 xiii. Administration of immunoglobulins and/or any blood products within the three months  
23 158 preceding the planned trial immunisation date  
24  
25  
26

27 159 Further information on recruitment criteria can be found in Supplementary information.  
28

### 29 160 **Interventions**

30  
31 161 We will individually randomise participants to intensive or standard praziquantel (PZQ) treatment, in  
32 162 a 1:1 ratio. The intensive arm will receive three doses of PZQ (approximately 40mg/kg, assessed by  
33 163 height pole<sup>31</sup>) each two weeks apart prior to the first immunisation (the last of these 2-3 weeks before  
34 164 immunisation), followed by PZQ at 8 weeks (after primary endpoint sampling) and thereafter quarterly  
35 165 PZQ (approximately; timings adjusted to accommodate school terms) during follow up. The standard  
36 166 arm will receive their first dose of PZQ at week 8 (after immunisation and after primary endpoint  
37 167 sampling) and a second dose at week 52 (to conform to Uganda Ministry of Health policy, which is  
38 168 annual treatment) (**Figure 1**). No placebo will be used in this trial because all participants will be  
39 169 treated (albeit at different frequencies) and participants are unlikely to seek additional treatments  
40 170 outside the trial schedule: praziquantel treatment is not popular because of the recognised (although  
41 171 temporary) adverse effects (described in Supplementary information).  
42  
43  
44  
45  
46  
47  
48  
49

### 50 172 **Randomisation and allocation to treatment arm**

51  
52 173 A randomisation code will be generated by an independent statistician using a randomly permuted  
53 174 block size (sizes 4, 6, 8 and 10) and used to allocate participants to either receive quarterly PZQ  
54 175 (intensive arm) or annual PZQ (standard arm). A set of envelopes will be prepared, labelled  
55 176 sequentially with the randomisation numbers and containing a card indicating the corresponding  
56 177 allocation (to intensive or standard treatment). The randomisation code will be kept securely by the  
57  
58  
59  
60



178 trial statistician and made available only to those responsible for providing or preparing the trial  
 179 interventions. A second copy will be held by a data manager or statistician not otherwise involved in  
 180 the trial at the MRC/UVRI and LSHTM Uganda Research Unit. At enrolment, eligibility criteria will be  
 181 checked and eligible participants will be allocated sequentially to the next randomisation number  
 182 until the required sample size is achieved. Randomisation implementation will be done by a clinician  
 183 using the sequentially numbered opaque sealed envelopes. When the next randomisation number in  
 184 the sequence is allocated, the envelope bearing that number will be opened to reveal the allocation.

### 185 **Blinding**

186 Clinicians and participants will not be blinded to the treatment allocation since they will not  
 187 participate in outcome ascertainment; only immunology laboratory staff who are assessing trial  
 188 outcomes will be blinded.

### 189 **Immunisations**

190 We will study a portfolio of licensed vaccines (live and inert, oral and parental, priming and boosting)  
 191 expected to be beneficial (in some cases, already given) to adolescents in Uganda. Our schedule  
 192 (**Table 1**, supplementary **Table S1**) will comprise three main immunisation days (week 0, week 4 and  
 193 week 28). Additional HPV immunisation will be provided for girls aged 14 years or above, and a  
 194 second Tetanus/diphtheria boost will be given after completion of the study, to accord with the  
 195 national Expanded Programme on Immunisation (EPI) routines, but the response to these will not  
 196 specifically be assessed. Further rationale for the selection of vaccines is detailed in the  
 197 Supplementary information.

198

**Table 1. Immunisation schedule**

|                                                                                                                                                                                                                                                                                                                                                                                                                                                                                                                                        | Immunisation week 0                           | Immunisation week 4                           | [Immunisation week 8]                                   | Immunisation week 28                                      | [Immunisation week 52]                        |
|----------------------------------------------------------------------------------------------------------------------------------------------------------------------------------------------------------------------------------------------------------------------------------------------------------------------------------------------------------------------------------------------------------------------------------------------------------------------------------------------------------------------------------------|-----------------------------------------------|-----------------------------------------------|---------------------------------------------------------|-----------------------------------------------------------|-----------------------------------------------|
| <b>Live vaccines</b>                                                                                                                                                                                                                                                                                                                                                                                                                                                                                                                   | BCG vaccination / re-vaccination <sup>1</sup> | Yellow fever (YF-17D)<br>Oral typhoid (Ty21a) |                                                         |                                                           |                                               |
| <b>Non-live vaccines</b>                                                                                                                                                                                                                                                                                                                                                                                                                                                                                                               |                                               | HPV prime <sup>2</sup>                        | HPV boost for girls aged $\geq 14$ years <sup>3,4</sup> | HPV boost <sup>2</sup> and Tetanus/ diphtheria (Td) boost | Tetanus/ diphtheria (Td) boost <sup>4,5</sup> |
| 1. Prior BCG status may vary (data on history and documentation of prior BCG, and presence of a BCG scar, will be documented although these approaches have limitations for determining BCG status)<br>2. Both girls and boys will receive the HPV vaccine<br>3. The National EPI programme recommends three doses of HPV vaccine for older girls<br>4. These doses will be given to comply with guidelines but outcomes specifically relating to these doses will not be assessed<br>5. Priming by immunisation in infancy is assumed |                                               |                                               |                                                         |                                                           |                                               |

199

### 200 ***Schedule of immunisation and sampling***

201 The schedule of immunisation and sampling is outlined in **Figure 1** and **Table S1**. Pre-immunisation  
202 vaccine responses will be assessed in baseline samples. While optimal timings for outcome measures  
203 vary between vaccines, sampling at 8 weeks post BCG and 4 weeks post YF-17D, Ty21a, HPV and Td  
204 is proposed for the primary endpoints, targeting the establishment of memory responses and  
205 approximate peak of antibody responses. A secondary endpoint at one year will assess waning.  
206 Immunisation postponement criteria are detailed in Supplementary information.

### 207 ***Outcomes***

#### 208 *Primary outcomes*

209 These will be assessed in all participants.

- 210 i. **BCG:** BCG-specific IFN- $\gamma$  ELISpot response eight weeks post BCG immunisation.
- 211 ii. **YF-17D:** neutralising antibody titres (plaque-reduction neutralisation test) at four weeks post  
212 YF immunisation.
- 213 iii. **Ty21a:** *Salmonella typhi* lipopolysaccharide (LPS)-specific immunoglobulin (Ig)G concentration  
214 at four weeks post Ty21a immunisation.
- 215 iv. **HPV:** IgG specific for L1-proteins of HPV-16/18 at four weeks post HPV priming immunisation.
- 216 v. **Td:** Tetanus and diphtheria toxoid-specific IgG concentration at four weeks post Td  
217 immunisation.

#### 218 *Secondary outcomes*

219 These will be assessed in all participants and will further investigate estimates of protective  
220 immunity (for vaccines where these are available) and dynamics of the vaccine responses, as well as  
221 the impact of the interventions on parasite clearance.

- 222 i. **Protective immunity.** Proportions with protective neutralising antibody (YF); protective IgG  
223 levels (TT);<sup>32</sup> seroconversion rates (Ty21a) at four weeks post the corresponding  
224 immunisation.
- 225 ii. **Response waning.** Primary outcome measures (all vaccines) repeated at week 52, and area-  
226 under-the curve (AUC) analyses. Parasitic infection may accelerate,<sup>33</sup> and anti-parasitic  
227 interventions delay, waning.
- 228 iii. **Priming versus boosting.** Effects on priming versus boosting will be examined for HPV only,  
229 comparing outcomes four weeks after the first, and four weeks after the second vaccine dose.

1  
2  
3 230 iv. **Current *S. mansoni* infection status and intensity** will be determined by serum/plasma levels  
4 231 of circulating anodic antigen (CAA). The method is quantitative, highly specific for *Schistosoma*  
5 232 infection, and much more sensitive than the conventional Kato Katz method.<sup>34</sup> CAA will be  
6 233 assessed retrospectively on stored samples collected at baseline, on immunisation days, and  
7 234 on primary and secondary endpoint days.

11  
12 235 Furthermore, our sample collection will offer opportunities for an array of exploratory  
13 236 immunological evaluations on stored samples, focusing mainly on vaccine antigen specific outcomes.  
14 237 Exploratory assays will provide further detail on the role of immunological profiles and trans-  
15 238 kingdom effects in mediating helminth modulation of vaccine-specific responses.

### 19 239 ***Evaluation of parasite infection exposure***

20 240 The following measures will also be assessed in all participants, and will be used to describe the  
21 241 general infection-exposure experience of the study participants.

- 22 242 i. **Prior exposure to schistosomiasis** will be evaluated by ELISA for IgG to schistosome egg  
23 243 antigen using stored blood samples collected at baseline.
- 24 244 ii. **The presence of other helminth infections** will be determined retrospectively using stool  
25 245 PCR of samples collected at baseline and at weeks 28 and 52.<sup>30</sup> In accordance with national  
26 246 guidelines, all participants will be treated with albendazole or mebendazole after collection  
27 247 of samples for primary endpoints at week 8 and 28, and after collection of samples for  
28 248 secondary endpoints at week 52.
- 29 249 iii. **Current malaria infection status and intensity** will be assessed retrospectively by PCR on  
30 250 stored samples collected on immunisation days and at week 52. Individuals presenting with  
31 251 fever will be investigated using rapid diagnostic tests for malaria and treated based on the  
32 252 results and according to prevailing national guidelines.
- 33 253 iv. **Prior malaria exposure** will be evaluated by ELISA for IgG to malaria antigen using stored  
34 254 samples collected at baseline.

### 47 255 ***Sample size considerations***

48 256 Based on the literature<sup>4 35 36</sup> and preliminary data, we anticipate that, following log to base 10  
49 257 transformations that will be applied to normalise primary outcome measures, standard deviations  
50 258 (SDs) of primary outcome measures will lie between 0.3 and 0.6 on this log scale, and that effective  
51 259 treatment may increase responses by approximately 0.2 on the log scale (based on Tweyongyere *et*  
52 260 *al.*<sup>26</sup>). We have therefore powered our study to detect differences of this magnitude (0.2 on the log  
53 261 scale) or (in some cases) smaller (**Table 2**). We assume *S. mansoni* prevalence of  $\geq 80\%$ .

262 Based on these assumptions and a two independent samples t-test, we plan to include 480  
 263 participants in total (240 quarterly PZQ, 240 annual PZQ); of whom 384 are expected to be *S.*  
 264 *mansoni* infected,<sup>28</sup> giving 192 participants in each trial arm who are infected at baseline.

265 **Table 2** shows power estimates, for 5% type-1 error rate for each primary outcome measure and  
 266 assuming 20% loss to follow-up.

267

**Table 2. Power estimates** (5% type-1 error rate for each primary outcome measure)

| Standard deviation (log <sub>10</sub> )                                                                                                                                                                                                                                                       | Difference in mean log <sub>10</sub> transformed outcome, between trial arms |      |      |      |      |      |      |
|-----------------------------------------------------------------------------------------------------------------------------------------------------------------------------------------------------------------------------------------------------------------------------------------------|------------------------------------------------------------------------------|------|------|------|------|------|------|
|                                                                                                                                                                                                                                                                                               | 0.08                                                                         | 0.10 | 0.12 | 0.14 | 0.16 | 0.18 | 0.20 |
| 192 intensive PZQ vs 192 standard PZQ ( <i>S. mansoni</i> infected only)                                                                                                                                                                                                                      |                                                                              |      |      |      |      |      |      |
| 0.3                                                                                                                                                                                                                                                                                           | 65%                                                                          | 83%  | 94%  | 98%  | >99% | >99% | >99% |
| 0.4                                                                                                                                                                                                                                                                                           | 42%                                                                          | 59%  | 75%  | 87%  | 94%  | 98%  | 99%  |
| 0.5                                                                                                                                                                                                                                                                                           | 29%                                                                          | 42%  | 56%  | 69%  | 80%  | 88%  | 94%  |
| 0.6                                                                                                                                                                                                                                                                                           | 21%                                                                          | 31%  | 42%  | 53%  | 65%  | 75%  | 83%  |
| Cells highlighted in grey correspond to >80% power; differences in mean log <sub>10</sub> transformed outcome of 0.08, 0.10, 0.12, 0.14, 0.16, 0.18 and 0.20 are equivalent to geometric mean ratios for untransformed outcomes of 1.20, 1.26, 1.32, 1.38, 1.45, 1.51 and 1.59, respectively. |                                                                              |      |      |      |      |      |      |

268

### 269 ***Ethics and dissemination***

270 Ethical approval has been granted from the Research Ethics Committee of the Uganda Virus  
 271 Research Institute (UVRI REC, reference: GC/127/19/05/664) and the London School of Hygiene and  
 272 Tropical Medicine (LSHTM, reference: 16032), and from the Uganda National Council for Science and  
 273 Technology (UNCST, reference: HS2486) and the Uganda National Drug Authority (NDA, reference:  
 274 CTA0093). Any protocol amendments will be submitted to ethics committees and regulatory bodies  
 275 for approval before implementation.

276 Participants are adolescents and therefore a vulnerable human population. Care will be taken to  
 277 provide adequate, age and education-status appropriate information and to ensure that it is  
 278 understood; and to emphasise that participation is voluntary. Participants will be enrolled only when  
 279 they have given their own assent and when consent has been given by the parent or guardian.  
 280 Model consent and assent forms are shown in Supplementary file 2. No major risks to the  
 281 participants are anticipated since all the treatments and vaccines to be given are licensed and known  
 282 to be safe. The main risk to participants will be time lost from school work: we will work with  
 283 teachers and parents to minimise disruption to classes, and will avoid enrolment of primary 7  
 284 students since these classes are involved in national examinations. Further risks are discussed in  
 285 Supplementary information.

1  
2  
3 286 Study findings will be published through open access peer-reviewed journals, presentations at local,  
4  
5 287 national and international conferences and to the local community through community meetings.  
6  
7 288 Anonymised participant level datasets generated will be available upon request.

### 8 9 289 ***Patient and public involvement***

10  
11 290 Concepts involved in this work have been discussed with colleagues at the Vector Control Division  
12  
13 291 and Expanded Programme on Immunisation in the Ministry of Health (Uganda), with the Mukono  
14  
15 292 District Council and with community leaders and Village Health Teams from Koome subcounty. We  
16  
17 293 also have held meetings to explain the proposed work to teachers, parents, participants and village  
18  
19 294 members, and to address their questions about issues such as study length, the study's ethical  
20  
21 295 approval status, why adults were excluded from the study, and to explain to them why boys will also  
22  
23 296 receive the HPV vaccine. Study findings will be shared with these stakeholders and with participants.

### 23 24 297 ***Data management and analysis***

25  
26 298 Socio-demographic information and clinical and laboratory measurements will be recorded and  
27  
28 299 managed using Research Electronic Data Capture (REDCap) tools,<sup>37 38</sup> with paper-based forms as  
29  
30 300 back-up. All data will be recorded under a unique study ID number. When paper forms must be  
31  
32 301 used, data will be double entered in a study-specific database, with standard checks for  
33  
34 302 discrepancies. All data for analysis will be anonymised and stored on a secure and password-  
35  
36 303 protected server, with access limited to essential research personnel.

37  
38 304 Baseline characteristics including age, sex, school, location of birth, prior vaccination status,  
39  
40 305 helminth infection and prior exposure status and malaria infection and prior exposure status will be  
41  
42 306 summarised by trial arm. The effect of intensive (compared to standard) praziquantel treatment on  
43  
44 307 the outcomes will be analysed. Information on infection status will only be available after  
45  
46 308 randomisation. The primary analysis will be done on individuals identified as infected at baseline  
47  
48 309 (through randomisation, these will be balanced between treatment arms); this will test the  
49  
50 310 hypothesis that treating the infection (and subsequent reinfections) reverses the parasite's effects  
51  
52 311 on vaccine responses. If treating *S. mansoni* reverses adverse parasite effects on vaccine responses,  
53  
54 312 this may be a beneficial public health intervention. However, routine screening for parasite infection  
55  
56 313 before immunisation would be laborious. Secondary analyses will include all randomised individuals;  
57  
58 314 this will provide insight into the broader benefit of the interventions as public health measures. The  
59  
60 315 effect of intensive versus standard praziquantel treatment on primary outcomes will be assessed  
61  
62 316 using unpaired t-tests, with results presented as a mean difference in vaccine response measure  
63  
64 317 together with 95% confidence interval and p-value. For all outcomes, we will investigate adjusting  
65  
66 318 for corresponding baseline vaccine responses as this may improve the precision of effect estimates;

1  
2  
3 319 this will be done using multivariable regression. We anticipate that outcomes will be positively  
4  
5 320 skewed, and will apply log transformations to normalise distributions before analysis if required. The  
6  
7 321 detailed analytical plan is available on the online trial registration site  
8  
9 322 (<http://www.isrctn.com/ISRCTN60517191>).

10  
11  
12  
13  
14  
15  
16  
17  
18  
19  
20  
21  
22  
23  
24  
25  
26  
27  
28  
29  
30  
31  
32  
33  
34  
35  
36  
37  
38  
39  
40  
41  
42  
43  
44  
45  
46  
47  
48  
49  
50  
51  
52  
53  
54  
55  
56  
57  
58  
59  
60

For peer review only



## 323 Discussion

324 This will be the first adequately powered intervention study to investigate the effect of  
325 schistosomiasis treatment on vaccine responses in adolescents. This study will determine whether *S.*  
326 *mansoni* infection has a causal, reversible, impact on the response to live or inert vaccines, including  
327 effects on vaccine replication, immune response profile, priming, boosting and waning. The results  
328 will add to understanding of population differences in vaccine responses and on interventions that  
329 may enhance responses. If treating helminths improves vaccine responses in adolescents, combined  
330 parasite-control/immunisation programmes offer an attractive, practical public health intervention  
331 for schools and communities.

332 There are risks associated with our approach to addressing the trial objective. **First**, there is a risk of  
333 failure to clear *S. mansoni* infections, and repeated reinfection during the trial. This issue can be  
334 challenging because of incomplete cure or maturation of immature worms after treatment, and  
335 lifestyles in endemic communities that result in repeated exposure. To mitigate this, we will  
336 administer three PZQ treatments over a six-week period before the first immunisations, and  
337 continuing quarterly treatment in the intensive arm. **Second**, there is a risk that *S. mansoni* infection  
338 has long-term effects, not removed by treatment, mediated, for example, by epigenetic change.<sup>39</sup>  
339 However, studies show that parasite treatment results in immunological changes,<sup>40,41</sup> and our data  
340 suggest at least partial recovery of the measles vaccine response among young children treated for  
341 schistosomiasis.<sup>26</sup> By initiating intervention six to eight weeks before the first immunisations, and  
342 providing repeated intervention in the intensive arms, we hope to achieve significant resolution of *S.*  
343 *mansoni* effects.

344 We are interested in the effects of removing *S. mansoni*. Treating parasites can induce acute  
345 immunological change due to release of previously hidden antigens.<sup>42,43</sup> To minimise such effects,  
346 immunisations will be given at least 2 weeks after PZQ (the longest practicable interval; **Figure 1**).

347 Laboratory analyses will also highlight immune parameters and cellular populations that link  
348 environmental exposures to vaccine responses. Identifying processes associated with poor or good  
349 outcomes will inform strategies in vaccine design (for example, the genetic modification of vaccines,  
350 or innovative use of adjuvants, to counter any adverse immunological milieu, currently an area of  
351 intense research for cancer vaccines<sup>44</sup>); ultimately supporting the development of effective vaccines  
352 tailored to the low-income settings that most need them.

353

## 354 Study timeline

1  
2  
3 355 Applications for ethical approval were submitted in May 2018, with approval received in September  
4 356 2018 (Uganda Virus Research Institute Research Ethics Committee), May 2019 (National Drug  
5 357 Authority and Uganda National Council for Science and Technology), June 2019 (London School of  
6 358 Hygiene and Tropical Medicine). Collaborator/investigator/trial steering committee meetings were  
7  
8 359 also held during the initial 12-month planning period. The study began recruitment in July 2019.  
9  
10 360 Intervention will be up to 12 months, with completion of the project scheduled for September 2020.  
11  
12  
13  
14

361

### 362 **Competing interests**

363 Alison Elliott reports a grant from the Medical research Council, UK (POPVAC programme funding).  
364 The rest of the authors declare that they have no conflicts of interest.

### 365 **Author contributions**

366 AME conceived the study. AME, GN, ELW, AN, JN, SC, LZ and JK contributed to study design. LZ, GO,  
367 PNK, EN, GK, RA, CN, CO, MN, CZ, SA and FA are site clinicians/nurses/clinical laboratory technicians  
368 providing valuable input on clinical considerations of the intervention. MS, SK and RK are field  
369 workers handling the organisational integration of the intervention. AN, AM and ELW are involved in  
370 organisation of the databases, trial randomization, treatment allocation and drawing up of analytical  
371 plans. GN, LZ, JN, AN, SC, ELW and AME drafted the manuscript. All authors reviewed the  
372 manuscript, contributed to it and approved the final version.

### 373 **Acknowledgements**

374 We thank the Uganda National Expanded Programme for Immunisation, Sanofi Pasteur and PaxVax  
375 for providing the HPV, yellow fever and oral typhoid vaccines, respectively. The BCG and tetanus-  
376 diphtheria vaccines were kind donations from the Serum Institute of India. We thank the Vector  
377 Control Division of the Ministry of Health and the Mukono district local government for their  
378 support. We also thank members of the POPVAC programme steering committee (chaired by Prof.  
379 Richard Hayes) and the Data and Safety Monitoring Board (Dr David Meya, Prof Andrew Prendergast  
380 and Dr Elizabeth George).

### 381 **Funding**

382 The POPVAC programme of work is supported by the Medical Research Council of the United  
383 Kingdom (grant number MR/R02118X/1). SC and JN are supported in part by the Makerere  
384 University – Uganda Virus Research Institute Centre of Excellence for Infection and Immunity  
385 Research and Training (MUII-plus). MUII-plus is funded under the DELTAS Africa Initiative. The  
386 DELTAS Africa Initiative is an independent funding scheme of the African Academy of Sciences (AAS),

1  
2  
3 387 Alliance for Accelerating Excellence in Science in Africa (AESA) and supported by the New  
4 388 Partnership for Africa's Development Planning and Coordinating Agency (NEPAD Agency) with  
5 389 funding from the Wellcome Trust (grant 107743) and the UK Government. The MRC/UVRI and  
6 390 LSHTM Uganda Research Unit is jointly funded by the UK Medical Research Council (MRC) and the  
7 391 UK Department for International Development (DFID) under the MRC/DFID Concordat agreement  
8 392 and is also part of the EDCTP2 programme supported by the European Union.

9  
10 393 The study sponsor (London School of Hygiene and Tropical Medicine) and funders had no role in  
11 394 study design; collection, management, analysis, and interpretation of data; writing of the protocol;  
12 395 and the decision to submit the protocol for publication.

13  
14  
15  
16  
17 396 **POPVAC trial team**

18  
19 397 **Principal investigator:** Alison Elliott; **Project leader:** Ludoviko Zirimenya; **laboratory staff:** Gyaviira  
20 398 Nkurunungi, Stephen Cose, Rebecca Amongin, Beatrice Nassanga, Jacent Nassuuna, Irene Nambuya,  
21 399 Prossy Kabuubi, Emmanuel Niwagaba, Gloria Oduru, Grace Kabami; **statisticians and data**  
22 400 **managers:** Emily Webb, Agnes Natukunda, Helen Akurut, Alex Mutebe; **clinicians:** Anne Wajja, Milly  
23 401 Namutebi, Christopher Zziwa, Joel Serubanja; **nurses:** Caroline Onen, Esther Nakazibwe, Josephine  
24 402 Tumusiime, Caroline Ninsiima, Susan Amongi, Florence Akello; **internal monitor:** Mirriam  
25 403 Akello; **field workers:** Robert Kizindo, Moses Sewankambo, Denis Nsubuga, Samuel Kiwanuka, Fred  
26 404 Kiwudhu; **boatman:** David Abiriga; **administrative management:** Moses Kizza, Samsi Nansukusa;  
27 405 **internal and external collaborators:** Pontiano Kaleebu, Hermelijn Smits, Maria Yazdanbakhsh,  
28 406 Govert van Dam, Paul Corstjens, Sarah Staedke, Henry Luzze, James Kaweesa, Edridah Tukahebwa,  
29 407 Elly Tumushabe, Moses Muwanga  
30  
31  
32  
33  
34  
35  
36  
37  
38  
39  
40  
41  
42  
43  
44  
45  
46  
47  
48  
49  
50  
51  
52  
53  
54  
55  
56  
57  
58  
59  
60

408 **References**

- 409 1. Taniuchi M, Platts-Mills JA, Begum S, et al. Impact of enterovirus and other enteric pathogens on oral polio  
410 and rotavirus vaccine performance in Bangladeshi infants. *Vaccine* 2016;34(27):3068-75. doi:  
411 10.1016/j.vaccine.2016.04.080 [published Online First: 2016/05/08]
- 412 2. Fine PE. Variation in protection by BCG: implications of and for heterologous immunity. *Lancet*  
413 1995;346(8986):1339-45.
- 414 3. Black GF, Weir RE, Floyd S, et al. BCG-induced increase in interferon-gamma response to mycobacterial  
415 antigens and efficacy of BCG vaccination in Malawi and the UK: two randomised controlled studies. *Lancet*  
416 2002;359(9315):1393-401. doi: 10.1016/S0140-6736(02)08353-8
- 417 4. Muyanja E, Ssemaganda A, Ngauv P, et al. Immune activation alters cellular and humoral responses to  
418 yellow fever 17D vaccine. *The Journal of clinical investigation* 2014;124(7):3147-58. doi: 10.1172/jci75429  
419 [published Online First: 2014/06/10]
- 420 5. Barreto ML, Pilger D, Pereira SM, et al. Causes of variation in BCG vaccine efficacy: examining evidence from  
421 the BCG REVAC cluster randomized trial to explore the masking and the blocking hypotheses. *Vaccine*  
422 2014;32(30):3759-64. doi: 10.1016/j.vaccine.2014.05.042
- 423 6. Tanner R, Kakalacheva K, Miller E, et al. Serum indoleamine 2,3-dioxygenase activity is associated with  
424 reduced immunogenicity following vaccination with MVA85A. *BMC infectious diseases* 2014;14:660. doi:  
425 10.1186/s12879-014-0660-7 [published Online First: 2014/12/04]
- 426 7. Sissoko MS, Healy SA, Katile A, et al. Safety and efficacy of PfSPZ Vaccine against Plasmodium falciparum via  
427 direct venous inoculation in healthy malaria-exposed adults in Mali: a randomised, double-blind phase 1 trial.  
428 *The Lancet Infectious diseases* 2017;17(5):498-509. doi: 10.1016/s1473-3099(17)30104-4 [published Online  
429 First: 2017/02/22]
- 430 8. Venkatraman N, Ndiaye BP, Bowyer G, et al. Safety and Immunogenicity of a Heterologous Prime-Boost  
431 Ebola Virus Vaccine Regimen in Healthy Adults in the United Kingdom and Senegal. *The Journal of infectious*  
432 *diseases* 2018;219(8):1187-97. doi: 10.1093/infdis/jiy639
- 433 9. Barreto ML, Pereira SM, Pilger D, et al. Evidence of an effect of BCG revaccination on incidence of  
434 tuberculosis in school-aged children in Brazil: second report of the BCG-REVAC cluster-randomised trial.  
435 *Vaccine* 2011;29(31):4875-7. doi: 10.1016/j.vaccine.2011.05.023
- 436 10. van Riet E, Adegnika AA, Retra K, et al. Cellular and humoral responses to influenza in gabonese children  
437 living in rural and semi-urban areas. *The Journal of infectious diseases* 2007;196(11):1671-8. doi:  
438 10.1086/522010 [published Online First: 2007/11/17]
- 439 11. van Riet E, Retra K, Adegnika AA, et al. Cellular and humoral responses to tetanus vaccination in Gabonese  
440 children. *Vaccine* 2008;26(29-30):3690-5. doi: 10.1016/j.vaccine.2008.04.067 [published Online First:  
441 2008/06/10]
- 442 12. Venkatraman N, Ndiaye BP, Bowyer G, et al. Safety and Immunogenicity of a Heterologous Prime-Boost  
443 Ebola Virus Vaccine Regimen in Healthy Adults in the United Kingdom and Senegal. *The Journal of infectious*  
444 *diseases* 2019;219(8):1187-97. doi: 10.1093/infdis/jiy639
- 445 13. Brandt L, Feino Cunha J, Weinreich Olsen A, et al. Failure of the Mycobacterium bovis BCG vaccine: some  
446 species of environmental mycobacteria block multiplication of BCG and induction of protective immunity to  
447 tuberculosis. *Infection and immunity* 2002;70(2):672-8. [published Online First: 2002/01/18]
- 448 14. Flaherty DK, Vesosky B, Beamer GL, et al. Exposure to Mycobacterium avium can modulate established  
449 immunity against Mycobacterium tuberculosis infection generated by Mycobacterium bovis BCG vaccination.

- 1  
2  
3 450 *Journal of leukocyte biology* 2006;80(6):1262-71. doi: 10.1189/jlb.0606407 [published Online First:  
4 451 2006/09/14]  
5  
6 452 15. Maizels RM, McSorley HJ. Regulation of the host immune system by helminth parasites. *The Journal of*  
7 453 *allergy and clinical immunology* 2016;138(3):666-75. doi: 10.1016/j.jaci.2016.07.007 [published Online First:  
8 454 2016/08/02]  
9  
10 455 16. Wammes LJ, Mpairwe H, Elliott AM, et al. Helminth therapy or elimination: epidemiological,  
11 456 immunological, and clinical considerations. *The Lancet Infectious diseases* 2014;14(11):1150-62. doi:  
12 457 10.1016/S1473-3099(14)70771-6  
13  
14 458 17. Wammes LJ, Hamid F, Wiria AE, et al. Regulatory T cells in human geohelminth infection suppress immune  
15 459 responses to BCG and *Plasmodium falciparum*. *Eur J Immunol* 2010;40(2):437-42. doi: 10.1002/eji.200939699  
16  
17 460 18. Pfeiffer JK, Virgin HW. Viral immunity. Transkingdom control of viral infection and immunity in the  
18 461 mammalian intestine. *Science* 2016;351(6270) doi: 10.1126/science.aad5872  
19  
20 462 19. Onguru D, Liang Y, Griffith Q, et al. Human schistosomiasis is associated with endotoxemia and Toll-like  
21 463 receptor 2- and 4-bearing B cells. *The American journal of tropical medicine and hygiene* 2011;84(2):321-4.  
22 464 doi: 10.4269/ajtmh.2011.10-0397 [published Online First: 2011/02/05]  
23  
24 465 20. George PJ, Anuradha R, Kumar NP, et al. Evidence of microbial translocation associated with perturbations  
25 466 in T cell and antigen-presenting cell homeostasis in hookworm infections. *PLoS neglected tropical diseases*  
26 467 2012;6(10):e1830. doi: 10.1371/journal.pntd.0001830 [published Online First: 2012/10/12]  
27  
28 468 21. Rajamanickam A, Munisankar S, Bhootra Y, et al. Microbial Translocation Associated with an Acute-Phase  
29 469 Response and Elevations in MMP-1, HO-1, and Proinflammatory Cytokines in *Strongyloides stercoralis*  
30 470 Infection. *Infection and immunity* 2017;85(1) doi: 10.1128/iai.00772-16 [published Online First: 2016/11/09]  
31  
32 471 22. Sanya RE, Nkurunungi G, Andia Biraro I, et al. A life without worms. *Transactions of the Royal Society of*  
33 472 *Tropical Medicine and Hygiene* 2017:1-9. doi: 10.1093/trstmh/trx010 [published Online First: 2017/03/25]  
34  
35 473 23. Elias D, Britton S, Aseffa A, et al. Poor immunogenicity of BCG in helminth infected population is associated  
36 474 with increased in vitro TGF-beta production. *Vaccine* 2008;26(31):3897-902. doi: S0264-410X(08)00540-9  
37 475 [pii]  
38 476 10.1016/j.vaccine.2008.04.083 [published Online First: 2008/06/17]  
39  
40 477 24. Elias D, Wolday D, Akuffo H, et al. Effect of deworming on human T cell responses to mycobacterial  
41 478 antigens in helminth-exposed individuals before and after bacille Calmette-Guerin (BCG) vaccination. *Clin Exp*  
42 479 *Immunol* 2001;123(2):219-25.  
43  
44 480 25. Cooper PJ, Chico ME, Losonsky G, et al. Albendazole treatment of children with ascariasis enhances the  
45 481 vibriocidal antibody response to the live attenuated oral cholera vaccine CVD 103-HgR. *The Journal of*  
46 482 *infectious diseases* 2000;182(4):1199-206. doi: 10.1086/315837 [published Online First: 2000/09/09]  
47  
48 483 26. Tweyongyere R, Nassanga BR, Muhwezi A, et al. Effect of *Schistosoma mansoni* infection and its treatment  
49 484 on antibody responses to measles catch-up immunisation in pre-school children: A randomised trial. *PLoS*  
50 485 *neglected tropical diseases* 2019;13(2):e0007157. doi: 10.1371/journal.pntd.0007157 [published Online First:  
51 486 2019/02/15]  
52  
53 487 27. Chan AW, Tetzlaff JM, Altman DG, et al. SPIRIT 2013 statement: defining standard protocol items for  
54 488 clinical trials. *Ann Intern Med* 2013;158(3):200-7. doi: 10.7326/0003-4819-158-3-201302050-00583  
55 489 [published Online First: 2013/01/09]  
56  
57 490 28. Sanya RE, Nkurunungi G, Hoek Spaans R, et al. The Impact of Intensive Versus Standard Anthelmintic  
58 491 Treatment on Allergy-related Outcomes, Helminth Infection Intensity, and Helminth-related Morbidity in  
59 492 Lake Victoria Fishing Communities, Uganda: Results From the LaVIISWA Cluster-randomized Trial. *Clinical*

- 1  
2  
3 493 *infectious diseases : an official publication of the Infectious Diseases Society of America* 2019;68(10):1665-74.  
4 494 doi: 10.1093/cid/ciy761 [published Online First: 2018/09/12]  
5  
6 495 29. WHO. Adolescent Health Research Priorities: Report of a Technical Consultation 2015.  
7 496 [http://apps.who.int/iris/bitstream/10665/203564/1/WHO\\_FWC\\_MCA\\_15\\_07\\_eng.pdf?ua=1](http://apps.who.int/iris/bitstream/10665/203564/1/WHO_FWC_MCA_15_07_eng.pdf?ua=1) (accessed 17th  
8 497 May 2019).  
9  
10 498 30. Webb EL, Nampijja M, Kaweesa J, et al. Helminths are positively associated with atopy and wheeze in  
11 499 Ugandan fishing communities: results from a cross-sectional survey. *Allergy* 2016 doi: 10.1111/all.12867  
12  
13 500 31. Montresor A, Odermatt P, Muth S, et al. The WHO dose pole for the administration of praziquantel is also  
14 501 accurate in non-African populations. *Transactions of the Royal Society of Tropical Medicine and Hygiene*  
15 502 2005;99(1):78-81. doi: 10.1016/j.trstmh.2004.06.006  
16  
17 503 32. Plotkin SA. Correlates of protection induced by vaccination. *Clinical and vaccine immunology : CVI*  
18 504 2010;17(7):1055-65. doi: 10.1128/cvi.00131-10 [published Online First: 2010/05/14]  
19  
20 505 33. Riner DK, Ndombi EM, Carter JM, et al. Schistosoma mansoni Infection Can Jeopardize the Duration of  
21 506 Protective Levels of Antibody Responses to Immunizations against Hepatitis B and Tetanus Toxoid. *PLoS*  
22 507 *neglected tropical diseases* 2016;10(12):e0005180. doi: 10.1371/journal.pntd.0005180  
23  
24 508 34. Corstjens PL, Nyakundi RK, de Dood CJ, et al. Improved sensitivity of the urine CAA lateral-flow assay for  
25 509 diagnosing active Schistosoma infections by using larger sample volumes. *Parasites & vectors* 2015;8:241.  
26 510 doi: 10.1186/s13071-015-0857-7 [published Online First: 2015/04/22]  
27  
28 511 35. Fletcher HA, Snowden MA, Landry B, et al. T-cell activation is an immune correlate of risk in BCG vaccinated  
29 512 infants. *Nat Commun* 2016;7:11290. doi: 10.1038/ncomms11290  
30  
31 513 36. Safaeian M, Porras C, Pan Y, et al. Durable antibody responses following one dose of the bivalent human  
32 514 papillomavirus L1 virus-like particle vaccine in the Costa Rica Vaccine Trial. *Cancer prevention research*  
33 515 *(Philadelphia, Pa)* 2013;6(11):1242-50. doi: 10.1158/1940-6207.capr-13-0203 [published Online First:  
34 516 2013/11/06]  
35  
36 517 37. Harris PA, Taylor R, Minor BL, et al. The REDCap Consortium: Building an International Community of  
37 518 Software Platform Partners. *Journal of biomedical informatics* 2019;103208. doi: 10.1016/j.jbi.2019.103208  
38 519 [published Online First: 2019/05/13]  
39  
40 520 38. Harris PA, Taylor R, Thielke R, et al. Research electronic data capture (REDCap)--a metadata-driven  
41 521 methodology and workflow process for providing translational research informatics support. *Journal of*  
42 522 *biomedical informatics* 2009;42(2):377-81. doi: 10.1016/j.jbi.2008.08.010 [published Online First:  
43 523 2008/10/22]  
44  
45 524 39. Blok BA, Arts RJ, van Crevel R, et al. Trained innate immunity as underlying mechanism for the long-term,  
46 525 nonspecific effects of vaccines. *J Leukoc Biol* 2015;98(3):347-56. doi: 10.1189/jlb.5RI0315-096R  
47  
48 526 40. Watanabe K, Mwinzi PN, Black CL, et al. T regulatory cell levels decrease in people infected with  
49 527 *Schistosoma mansoni* on effective treatment. *The American journal of tropical medicine and hygiene*  
50 528 2007;77(4):676-82. [published Online First: 2007/11/06]  
51  
52 529 41. Schmiedel Y, Mombo-Ngoma G, Labuda LA, et al. CD4+CD25hiFOXP3+ Regulatory T Cells and Cytokine  
53 530 Responses in Human Schistosomiasis before and after Treatment with Praziquantel. *PLoS neglected tropical*  
54 531 *diseases* 2015;9(8):e0003995. doi: 10.1371/journal.pntd.0003995 [published Online First: 2015/08/21]  
55  
56 532 42. van den Biggelaar AHJ, Borrmann S, Kremsner P, et al. Immune Responses Induced by Repeated Treatment  
57 533 Do Not Result in Protective Immunity to *Schistosoma haematobium*: Interleukin (IL)–5 and IL-10 Responses.  
58 534 *The Journal of infectious diseases* 2002;186(10):1474-82. doi: 10.1086/344352  
59  
60



- 1  
2  
3 535 43. Woolhouse MEJ, Hagan P. Seeking the ghost of worms past. *Nature Medicine* 1999;5(11):1225-27. doi:  
4 536 10.1038/15169  
5  
6 537 44. Seledtsov VI, Goncharov AG, Seledtsova GV. Clinically feasible approaches to potentiating cancer cell-based  
7 538 immunotherapies. *Human vaccines & immunotherapeutics* 2015;11(4):851-69. doi:  
8 539 10.1080/21645515.2015.1009814 [published Online First: 2015/05/02]  
9 540

10  
11  
12 541

13  
14  
15 542 **FIGURE LEGENDS**

16  
17 543 **Figure 1. Outline of immunisations and anthelmintic intervention**

18  
19 544 <sup>1</sup>Primary endpoints will be at eight weeks post BCG and four weeks post Yellow fever (YF-17D), oral  
20 545 typhoid (Ty21a), Human Papilloma Virus (HPV) and Tetanus/diphtheria (Td) vaccination.

21  
22 546 <sup>2</sup>Primary endpoint for responses to Td given at 28 weeks.  
23

24 547  
25  
26  
27  
28  
29  
30  
31  
32  
33  
34  
35  
36  
37  
38  
39  
40  
41  
42  
43  
44  
45  
46  
47  
48  
49  
50  
51  
52  
53  
54  
55  
56  
57  
58  
59  
60



★ praziquantel; - - - immunisations; PE - - - primary endpoint; SE - - - secondary endpoint  
★ standard arm, no praziquantel

1  
2  
3 1 **SUPPLEMENTARY INFORMATION**  
4

5 2

6  
7 3 **The effect of intensive treatment for schistosomiasis on immune responses to vaccines among**  
8 **rural Ugandan island adolescents: randomised controlled trial protocol A for the ‘POPulation**  
9 **differences in VACCine responses’ (POPVAC) programme**  
10  
11

12  
13 6 Gyaviira Nkurunungi<sup>1,¶,\*</sup>, Ludoviko Zirimenya<sup>4,¶</sup>, Jacent Nassuuna<sup>4,¶</sup>, Agnes Natukunda<sup>1,¶</sup>, Prossy N  
14 7 Kabuubi<sup>1</sup>, Emmanuel Niwagaba<sup>1</sup>, Gloria Oduru<sup>1</sup>, Grace Kabami<sup>1</sup>, Rebecca Amongin<sup>1</sup>, Alex Mutebe<sup>1</sup>,  
15 8 Milly Namutebi<sup>1</sup>, Christopher Zziwa<sup>1</sup>, Susan Amongi<sup>1</sup>, Caroline Ninsiima<sup>1</sup>, Caroline Onen<sup>1</sup>, Florence  
16 9 Akello<sup>1</sup>, Moses Sewankambo<sup>1</sup>, Samuel Kiwanuka<sup>1</sup>, Robert Kizindo<sup>1</sup>, James Kaweesa<sup>2</sup>, Stephen Cose<sup>4,3</sup>,  
17 10 Emily L Webb<sup>4</sup>, Alison M Elliott<sup>1,3</sup> for the POPVAC trial team  
18  
19  
20  
21

22 11

23  
24 12 <sup>1</sup>Immunomodulation and Vaccines Programme, Medical Research Council/Uganda Virus Research  
25 13 Institute and London School of Hygiene and Tropical Medicine (MRC/UVRI and LSHTM) Uganda  
26 14 Research Unit, Entebbe, Uganda  
27

28  
29 15 <sup>2</sup>Vector Control Division, Ministry of Health, Kampala, Uganda  
30

31  
32 16 <sup>3</sup>Department of Clinical Research, London School of Hygiene and Tropical Medicine, London, United  
33 17 Kingdom  
34

35  
36 18 <sup>4</sup>MRC Tropical Epidemiology Group, Department of Infectious Disease Epidemiology, London School  
37 19 of Hygiene and Tropical Medicine, London, United Kingdom  
38

39 20 <sup>¶</sup>These authors contributed equally  
40

41  
42 21 **\*Correspondence:** Gyaviira Nkurunungi; [Gyaviira.Nkurunungi@mrcuganda.org](mailto:Gyaviira.Nkurunungi@mrcuganda.org)  
43  
44  
45  
46  
47  
48  
49  
50  
51  
52  
53  
54  
55  
56  
57  
58  
59  
60

Table S1. Schedule of visits and procedures

| VISIT NUMBER                                                                                                                                  | 1               | 2 & 3                     | 4             | 5 <sup>9</sup> | 5.2             | 6                                    | 7       | 8             | 9                                       | 10      | 11                |
|-----------------------------------------------------------------------------------------------------------------------------------------------|-----------------|---------------------------|---------------|----------------|-----------------|--------------------------------------|---------|---------------|-----------------------------------------|---------|-------------------|
| WEEKS FROM 1 <sup>ST</sup> IMMUNISATION                                                                                                       | -8 <sup>1</sup> | -6 <sup>10</sup> , -4, -2 | 0             | 4              | 4 weeks +4 days | 8                                    | 20      | 28            | 32                                      | 44      | 52                |
|                                                                                                                                               | Screening       | Treatment (Rx) only       | Immunisations | Immunisations  |                 | Primary Endpoint (PE), Immunisations | Rx only | Immunisations | PE/Secondary Endpoint (SE) <sup>2</sup> | Rx only | SE, Immunisations |
| <b>RANDOMISED INTENSIVE VS STANDARD PRAZIQUANTEL INTERVENTION</b>                                                                             |                 |                           |               |                |                 |                                      |         |               |                                         |         |                   |
| PZQ intensive arm (x)                                                                                                                         |                 | x                         |               |                |                 | x <sup>3</sup>                       | x       |               | x <sup>3</sup>                          | x       | x <sup>3</sup>    |
| PZQ standard arm                                                                                                                              |                 |                           |               |                |                 | x <sup>3</sup>                       |         |               |                                         |         | x <sup>3</sup>    |
| Albendazole                                                                                                                                   |                 |                           |               |                |                 | x <sup>3</sup>                       |         |               | x <sup>3</sup>                          |         | x <sup>3</sup>    |
| <b>VACCINES</b>                                                                                                                               |                 |                           |               |                |                 |                                      |         |               |                                         |         |                   |
| BCG                                                                                                                                           |                 |                           | x             |                |                 |                                      |         |               |                                         |         |                   |
| YF-17D                                                                                                                                        |                 |                           |               | x              |                 |                                      |         |               |                                         |         |                   |
| Ty21a                                                                                                                                         |                 |                           |               | x              |                 |                                      |         |               |                                         |         |                   |
| HPV                                                                                                                                           |                 |                           |               | x              |                 | [x] <sup>4</sup>                     |         | x             |                                         |         |                   |
| Td                                                                                                                                            |                 |                           |               |                |                 |                                      |         | x             |                                         |         | [x] <sup>5</sup>  |
| <b>INVESTIGATIONS/PROCEDURES</b>                                                                                                              |                 |                           |               |                |                 |                                      |         |               |                                         |         |                   |
| Inclusion/exclusion criteria                                                                                                                  | x               |                           |               |                |                 |                                      |         |               |                                         |         |                   |
| Informed consent                                                                                                                              | x               |                           |               |                |                 |                                      |         |               |                                         |         |                   |
| Questionnaire                                                                                                                                 | x               |                           | x             | x              | x               | x                                    |         | x             | x                                       |         | x                 |
| Examination                                                                                                                                   | x               |                           | (x)           | (x)            | (x)             | (x)                                  |         | (x)           | (x)                                     |         | (x)               |
| Urine β-HCG test (female only) 1mL                                                                                                            | x               |                           | x             | x              |                 |                                      |         | x             |                                         |         |                   |
| Urine YF viral load                                                                                                                           |                 |                           |               |                | x               |                                      |         |               |                                         |         |                   |
| Stool for PCR and storage                                                                                                                     | x               |                           |               |                |                 |                                      |         | x             |                                         |         | x                 |
| Stool for coproantibody and storage                                                                                                           | x               |                           |               |                |                 | x                                    |         |               |                                         |         |                   |
| <b>BLOOD SAMPLES</b>                                                                                                                          |                 |                           |               |                |                 |                                      |         |               |                                         |         |                   |
| Malaria PCR (1ml)                                                                                                                             |                 |                           | x             | x              |                 |                                      |         | x             |                                         |         | x                 |
| Serology for HIV, prior malaria and <i>S. mansoni</i> (0.5ml)                                                                                 | x               |                           |               |                |                 |                                      |         |               |                                         |         |                   |
| Mansonella perstans (1ml)                                                                                                                     | x               |                           |               |                |                 |                                      |         |               |                                         |         |                   |
| Serum/plasma CAA (1ml)                                                                                                                        | x               |                           | x             | x              |                 | x                                    |         | x             | x                                       |         | x                 |
| Hb <sup>8</sup> / Full blood count (0.5ml)                                                                                                    | x               |                           | x             | x              |                 |                                      |         | x             |                                         |         |                   |
| Assessments of pre-immunisation responses, and/or vaccine response outcomes and/or exploratory immunology; storage <sup>7</sup> (10 – 20 mls) |                 |                           | x             | x              |                 | x                                    |         | x             | x                                       |         | x                 |
| Blood for gene expression (2mls)                                                                                                              |                 |                           | x             | x              |                 |                                      |         | x             |                                         |         |                   |
| Blood vol (mL)                                                                                                                                | 4               |                           | 27            | 17             |                 | 10-20                                |         | 27            | 10                                      |         | 14                |
| Cumulative blood vol (mL) <sup>7</sup>                                                                                                        | 4               |                           | 31            | 48             |                 | 68                                   |         | 95            | 105                                     |         | 119               |

**PE:** primary endpoint; **SE:** secondary endpoint; **Rx only:** treatment only

Immunisation days highlighted in green, primary end point days in red, days for treatment only in grey

(x) performed if clinically indicated

1. Screening and enrolment into Project A will take place about 8 weeks before immunisation 0 to allow initiation of the praziquantel intervention.
2. Week 32 is primary endpoint for responses to Td given at 28 weeks; secondary endpoint for HPV booster
3. Treatments given after sampling when schedules coincide
4. Week 8 HPV dose will be given for previously-unvaccinated girls aged  $\geq 14$  years
5. Week 52 Td booster dose will be provided as a service
6. Exploratory immunology blood volume will be guided by guidelines from Harvard Mass General, where a maximum of 3ml/kg body weight is taken at any one time point and not more than 3ml/kg is taken over any 8-week period (ref [http://www.drgreene.com/21\\_1616.html](http://www.drgreene.com/21_1616.html).) These guidelines have been followed in a previous study vaccinating adolescents with investigational tuberculosis vaccine MVA85A (in Uganda).<sup>1</sup> The total blood volume planned is 68 ml over the initial intensive sampling period of 8 weeks. Revision of sample volumes based on weight will only be required for participants who weigh less than 22 kg; the average weight of children aged 9 years is expected to be 28kg (with 21kg the 3rd centile) with greater weights for older children.<sup>2</sup>
7. At baseline, it will only be Hb estimation by Haemocue
8. Oral typhoid vaccine doses will be administered on three alternate days namely visit 5, 5.1 and 5.2.
9. The first PZQ treatment at week -6 will be administered at the end of the screening visit

22

### 23 **Further information on recruitment criteria**

- 24 • Participants who are excluded from the trial because they have been discovered (during  
25 screening procedures) to be suffering from a previously undiagnosed condition thought to  
26 require further medical attention will be referred appropriately for further investigation and  
27 treatment.
- 28 • Participants discovered to have severe anaemia will be excluded from the trial and treated  
29 for anaemia
- 30 • Participants discovered to be HIV-positive will be counselled and offered a CD4 T-cell count  
31 and referred to a provider of antiretroviral treatment (“Test and Treat” – i.e. initiation of  
32 treatment regardless of CD4 count is recommended for these high-risk communities).
- 33 • Participants discovered to be pregnant will be counselled and referred to an antenatal clinic  
34 of their choice.

35 This trial proposes to recruit all participants within a short time-frame. It will not, therefore, be  
36 possible to reconsider enrolment of potential participants with temporary exclusion criteria after  
37 treatment and resolution of the condition.

### 38 **Further rationale for the selection of vaccines**

#### 39 *Bacillus Calmette–Guérin (BCG)*

40 BCG is a live, replicating parenteral vaccine, and the only licensed vaccine against TB. The BCG  
41 vaccine for these studies will be obtained from the Serum Institute of India either directly, or  
42 through a supplier in Uganda. The Serum Institute of India provides much of the BCG vaccine used  
43 in Uganda.

44 Worldwide, TB is among the top 10 causes of death; Uganda has an estimated incidence of  
45 202/100,000 people.<sup>3</sup> Infectious, sputum positive, pulmonary TB classically emerges in adolescence,  
46 driving the on-going epidemic.<sup>4</sup> Thus adolescent booster immunisation is a key TB control strategy.<sup>5</sup>  
47 However, BCG vaccine response and efficacy are often impaired in tropical and rural settings<sup>6-8</sup> and  
48 new TB vaccines are similarly affected.<sup>9</sup> In the past, the WHO has been hesitant to recommend BCG  
49 re-vaccination. However, in 2017 WHO’s Strategic Advisory Group of Experts (SAGE) recommended:  
50 “Further research is warranted to explore whether certain sub-groups of age, geographic or *M.*  
51 *tuberculosis* exposure categories would benefit from re-vaccination.”<sup>10</sup> Recent results suggest that,  
52 despite the variability of BCG efficacy between populations, BCG vaccination in adolescence offers  
53 benefit in some tropical settings, especially for individuals who are not yet infected with  
54 *Mycobacterium tuberculosis*, and may also be cost-effective.<sup>7,11</sup> Also, BCG vaccine is currently being  
55 used among adolescents in South Africa as a comparator in a trial of a novel TB vaccine (trial



1  
2  
3 56 registration NCT02075203). BCG efficacy in Ugandan adolescents, and differences in BCG vaccine  
4  
5 57 responses between urban and rural Ugandan populations, have not been tested. Information  
6  
7 58 obtained from this study is expected to further inform the use of BCG in adolescents, and also to  
8  
9 59 inform the development of new vaccines for tuberculosis.

#### 10 60 *Yellow fever vaccine*

11  
12 61 Yellow fever vaccine YF-17D is a live replicating parenteral vaccine. The vaccine (Stamaril; Sanofi  
13  
14 62 Pasteur) is available for purchase in Uganda. Yellow Fever (YF) causes outbreaks in Uganda and the  
15  
16 63 wider region<sup>12</sup> and YF-17D is a candidate for Uganda's expanded programme on immunisation (EPI).  
17  
18 64 Lower vaccine replication, lower neutralising antibody induction, and greater waning, are described  
19  
20 65 in Uganda compared to Switzerland.<sup>13</sup> YF-17D is a potential vector for novel vaccine constructs,<sup>14</sup>  
21  
22 66 adding relevance to vaccine development.

#### 23 67 *Typhoid vaccine Ty21a*

24  
25 68 Typhoid vaccine Ty21a is a live replicating oral vaccine and also a potential vector for new vaccine  
26  
27 69 constructs.<sup>15</sup> The Ty21a vaccine will be purchased from PaxVax, Redwood City, California.  
28  
29 70 Substantial, multi-year typhoid outbreaks occur in Uganda and immunisation campaigns have been  
30  
31 71 advocated as cost effective.<sup>16</sup> Schistosomiasis has been associated with prolonged *S. typhi* infection<sup>17</sup>  
32  
33 72 and impaired antibody responses to killed typhoid vaccines.<sup>18</sup>

34  
35 73 Ty21a was developed in the 1970s. Although not routinely used in Uganda, it has been (and is  
36  
37 74 currently) registered in many countries. It was first registered in the United States and United  
38  
39 75 Kingdom in the 1980s, and is recommended by the WHO for both endemic and epidemic settings.<sup>19</sup>  
40  
41 76 It has comparable efficacy to the parenteral Vi polysaccharide typhoid vaccine, good durability and  
42  
43 77 minimal adverse effects.<sup>19</sup> It is proposed for use in this study to model effects of study exposures  
44  
45 78 and intervention on the response to a live oral vaccine.

46  
47 79 The Ty21a vaccine is given as a three-dose regimen on alternate days.

#### 48 80 *Human Papilloma Virus (HPV) vaccine*

49  
50 81 The Human Papilloma Virus (HPV) vaccine is a protein virus-like particle. The quadrivalent HPV  
51  
52 82 Vaccine Gardasil (Merck) is available for purchase in Uganda and is the vaccine used by the national  
53  
54 83 EPI programme. Studies after three vaccine doses have found somewhat enhanced responses in the  
55  
56 84 presence of malaria, but no effect of helminths.<sup>20</sup> No study has previously investigated parasite  
57  
58 85 effects on the priming response, but recent results for tetanus suggest that priming may be more  
59  
60 86 susceptible than boosting to adverse effects.<sup>21</sup> This will be important if forthcoming trials support  
87  
88 89 single-dose HPV immunisation (NCT02834637). HPV immunisation is being rolled out among girls to

1  
2  
3 88 prevent cervical neoplasia, the most common cancer among Ugandan women and we will  
4  
5 89 coordinate provision with the national HPV immunisation programme.<sup>22</sup> HPV immunisation is also  
6  
7 90 beneficial for boys since HPV infection is associated with anogenital warts, anal cancer and  
8  
9 91 oropharyngeal cancers in both males and females, and with penile cancer in men,<sup>23</sup> and we will  
10  
11 92 include boys in these studies.

### 12 93 *Tetanus and diphtheria vaccines*

14 94 Tetanus and diphtheria (Td) vaccines comprise inert toxoids. Schistosomiasis is associated with a Th2  
15  
16 95 biased response to tetanus toxoid<sup>24</sup> and with suppressed antibody responses among those with low  
17  
18 96 pre-immunisation antibody levels.<sup>21</sup> Booster immunisation is recommended for young women to  
19  
20 97 prevent maternal and neonatal tetanus. Recent evidence emphasises the need to protect young  
21  
22 98 men also.<sup>25</sup>

### 23 99 ***Immunisation Postponement Criteria***

25 100 If any one of the following is identified at the time scheduled for immunisation, the participant may  
26  
27 101 be immunised at a later date, or withdrawn, at the discretion of the Investigator. The participant  
28  
29 102 must be followed until resolution of the event as with any adverse event:

- 31 103 • Acute disease at the time of immunisation. Acute disease is defined as the presence of a  
32  
33 104 moderate or severe illness with or without fever. All vaccines can be administered to persons  
34  
35 105 with a minor illness such as diarrhoea or mild upper respiratory infection with or without low-  
36  
37 106 grade fever, i.e. temperature of  $\leq 37.5^{\circ}\text{C}$  ( $99.5^{\circ}\text{F}$ )
- 38 107 • Temperature of  $>37.5^{\circ}\text{C}$  ( $99.5^{\circ}\text{F}$ ) at the time of immunisation
- 40 108 • Taking antibiotics or antimalarials currently, or within the past 7 days, of the date of Ty21a  
41  
42 109 administration (ascertained verbally)

### 44 110 ***Vaccine storage and transport***

46 111 In order to maintain a reliable vaccine cold chain, the vaccines and diluents to be used will be stored  
47  
48 112 and transported within the recommended temperature range of  $+2^{\circ}\text{C}$  to  $+8^{\circ}\text{C}$ . Care will be taken to  
49  
50 113 ensure that the vaccines are not frozen. BCG, being sensitive to light, will be kept in the dark  
51  
52 114 (normally within its secondary packaging) for as long as possible to protect it during storage and  
53  
54 115 transportation. All vaccines will be kept in appropriate refrigeration equipment with a temperature  
55  
56 116 monitoring device to ensure temperatures remain between  $+2^{\circ}\text{C}$  and  $+8^{\circ}\text{C}$ . Cold boxes/vaccines  
57  
58 117 carriers with temperature monitors will be used to transport vaccines and the diluents from the  
59  
60 118 MRC/UVRI and LSHTM Uganda Research Unit (Entebbe) to Koome island and while transporting  
119  
vaccines to immunisation sessions. Designated staff will be given responsibility for managing the

1  
2  
3 120 vaccine cold chain. All cold chain equipment including the temperature monitoring devices used for  
4  
5 121 this project will comply with relevant technical specifications as defined by the EPI standards. Basic  
6  
7 122 routine maintenance will be regularly carried out on all cold chain equipment.

### 8 9 123 ***Additional laboratory measurements***

10  
11 124 Additional assays will comprise HIV serology, pregnancy testing and full blood counts. HIV testing  
12  
13 125 and pregnancy testing will be accompanied by appropriate counselling by trained staff.

- 14  
15 126 • HIV serology will be done on blood samples using rapid tests and according to prevailing  
16  
17 127 national algorithms.<sup>26</sup> This will be done at baseline.
- 18  
19 128 • Pregnancy testing will be done using urine samples and standard operating procedures for  
20  
21 129 assessment of urine  $\beta$ -human chorionic gonadotropin ( $\beta$ hCG). This will be done at baseline  
22  
23 130 and before immunisation on each immunisation day.
- 24  
25 131 • Full blood counts will be conducted using a haematology analyser. Mild, moderate and  
26  
27 132 severe anaemia will be defined according to WHO guidelines, by age.<sup>27</sup> This will be done at  
28  
29 133 baseline to test for anaemia as part of the eligibility assessment, and pre-immunisation as  
30  
31 134 part of the assessment of immunological profile.

32  
33 135 Individuals found to be HIV positive or pregnant will be referred to appropriate providers for further  
34  
35 136 care. Individuals with severe anaemia (haemoglobin  $<82\text{g/L}$ ) will be excluded from the randomised  
36  
37 137 intervention (since the intervention might be beneficial in management of anaemia). They will be  
38  
39 138 treated for anaemia.

### 40 41 139 ***Sample handling and archive***

42  
43 140 Blood and other samples will be processed according to local laboratory standard operating  
44  
45 141 procedures (SOPs). All samples will reach the laboratory in anonymised form.

46  
47 142 A sample archive will be developed. Although our current programme of work will address specific  
48  
49 143 hypotheses regarding pathways of effects of parasites and interventions, the sample archive will  
50  
51 144 provide a major asset for exploration of new leads arising from this work, or for an alternative,  
52  
53 145 “systems biology” approach employing (for example) proteomic, genomic, epigenetic and  
54  
55 146 transcriptomic analyses, and investigating the microbiome and virome. Information provided to  
56  
57 147 participants, and consent forms, will include considerations of sample storage, and the possibility of  
58  
59 148 sample analysis in laboratories within and outside Uganda. Participants will be able to decide if they  
60  
149 will permit such future use of any leftover samples. We plan to store the samples for up to 20 years.  
150  
151 If further storage is needed after that time, permission will be requested from the Uganda Virus  
Research Institute and London School of Hygiene and Tropical Medicine ethical review committees.

1  
2  
3 152 If they elect not to permit this, all of those leftover samples will be discarded after the completion of  
4  
5 153 the work included in the current protocol.

6  
7 154 ***Operational considerations***

8  
9 155 *Programme governance*

10  
11 156 A Programme Steering Committee has been set up to guide progress across all projects. This  
12  
13 157 comprises the following:

- 14  
15 158 • An independent chair
- 16  
17 159 • Representatives from the Ministry of Health programmes for immunisation and for vector  
18  
19 160 borne disease control
- 20  
21 161 • Representatives of district authorities (Mukono and Jinja districts)
- 22  
23 162 • Community representatives
- 24  
25 163 • Principal investigator and co-investigators
- 26  
27 164 • Project leader and post-doctoral immunologist
- 28  
29 165 • Trial statistician
- 30  
31 166 • Laboratory manager
- 32  
33 167 • Medical Research Council observer

34  
35 168 *Informed consent*

36  
37 169 Both written informed assent from the participants and written informed consent from a parent or  
38  
39 170 guardian will be required for participation, although these may not necessarily be obtained at the  
40  
41 171 same time. Information will be provided in both English and the appropriate local language. For  
42  
43 172 individuals who cannot speak the languages used, or who cannot read or write, a witness who can  
44  
45 173 read the information sheet and translate the information to the participant or parent/guardian will  
46  
47 174 be used. Two different types of age specific assent forms will be used for the group of participants  
48  
49 175 aged 9 – 12 years and for the group aged 13 – 17 years. Informed consent by emancipated or mature  
50  
51 176 minors will be obtained using a designated consent form for these categories of participants.

52  
53 177 The aims of the study, all tests, treatments and immunisations to be carried out and potential risks  
54  
55 178 will be explained. The participant will be given the opportunity to ask about details of the trial, and  
56  
57 179 will then have time to consider whether or not to participate. If they do decide to participate, they  
58  
59 180 and their parent/guardian will sign and date two copies of the assent and consent forms, one for  
60  
181 them to take away and keep, and one to be stored securely by the research team. Separate  
182  
information and consent forms will be provided (i) for consent for storage of samples for future

183 studies and for anonymous sharing of data from this study and (ii) for possible genetic studies; the  
184 information sheet will explain that these data may be used in analyses related to this protocol.

#### 185 *Screening and Eligibility Assessment*

186 Once the informed consent process has been completed, and consent (and assent) given, a baseline  
187 medical history (including concomitant medication) will be collected. Vital signs will be checked and  
188 a physical examination will be performed. Inclusion and exclusion criteria will be checked.

189 Participants will undergo pre- and post-test counselling for HIV and (for girls) pregnancy testing by a  
190 trained and experienced nurse- or clinician-counsellor. Blood, urine and stool samples will be  
191 obtained, for tests as specified in the schedule of procedures. These tests are to exclude the major,  
192 immunomodulating co-infection, HIV, and conditions that might impact safety (anaemia,  
193 pregnancy).

#### 194 *Enrolment*

195 Participants who consent/assent, complete the screening processes, satisfy all the inclusion criteria  
196 and meet none of the exclusion criteria will be enrolled.

#### 197 *Discontinuation/withdrawal criteria*

198 In accordance with the principles of the current revision of the Declaration of Helsinki and any other  
199 applicable regulations, a participant has the right to withdraw from the study at any time and for any  
200 reason, and is not obliged to give his or her reasons for doing so. The Investigator may withdraw the  
201 participant at any time in the interests of the participant's health and well-being. In addition, the  
202 participant may withdraw/be withdrawn for any of the following reasons:

- 203 • Ineligibility (either arising during the study or retrospectively, having been overlooked at  
204 screening)
- 205 • Administrative decision by the Investigator
- 206 • Significant protocol deviation
- 207 • Participant non-compliance with study requirements
- 208 • An adverse event which requires discontinuation of the study involvement or results in  
209 inability to continue to comply with study procedures.

210 Any participant who becomes pregnant during the trial will be followed up until the end of the  
211 pregnancy but no further immunisations will be given unless indicated during pregnancy (as is the  
212 case for tetanus toxoid). The trial allocation for this participant will be unblinded and the participant  
213 will only be given further treatment if clinically indicated. The babies will also be followed up and

1  
2  
3 214 examined for any adverse effects. We will not routinely perform venepuncture in a pregnant  
4  
5 215 participant.

6  
7 216 The reason for withdrawal will be recorded in the case report form (CRF). If withdrawal is due to an  
8  
9 217 AE, appropriate follow-up visits or medical care will be arranged, with the agreement of the  
10  
11 218 participant, until the AE has resolved, stabilised or a non-trial related causality has been assigned.

12  
13 219 If a participant withdraws from the study samples collected before their withdrawal from the trial  
14  
15 220 will be used/ stored unless the participant specifically requests otherwise.

16 221 *Trial discontinuation*

17  
18 222 The trial will be discontinued in the event of new scientific information that renders continuation  
19  
20 223 futile or unethical, or for any other reason, at the discretion of the Programme Steering Committee.

21  
22 224 *End of study definition*

23  
24 225 The trial will be completed when the last participant enrolled into the trial has completed their final  
25  
26 226 follow up visit.

27  
28 227 *Safety assessments and oversight*

29  
30 228 No new investigational drug or product will be used in the proposed trial. However, standard  
31  
32 229 approaches for monitoring safety and reporting of serious adverse events will be followed.

33  
34 230 *Monitoring*

35  
36 231 The trial will be monitored by both internal and external monitors according to a pre-defined  
37  
38 232 monitoring plan which will include a site initiation visit, monitoring visits at least annually, and a  
39  
40 233 close-out visit. The monitors will assess patient safety, data integrity, and adherence to the protocol  
41  
42 234 and to Good Clinical Research Practice procedures.

43  
44 235 ***Considerations regarding standard of care***

45  
46 236 *S. mansoni* infection status will be determined retrospectively through assays conducted in bulk on  
47  
48 237 stored samples (plasma CAA). These results will not, therefore, be useful to determine management  
49  
50 238 of individual participants.

51 239 Participants in the standard treatment arm will receive lower levels of anthelmintic treatment.

52  
53 240 However, all trial arms will receive a minimum of well-implemented national standard of care.

54  
55 241 Standard of care will comprise annual praziquantel treatment. Our own results from the Lake

56  
57 242 Victoria Island Intervention Study on Worms and Allergy-related diseases (LaVIISWA),<sup>28</sup> which

58  
59 243 compared annual versus quarterly intervention for schistosomiasis at community level over three  
60



1  
2  
3 244 years, showed no advantage of quarterly treatment for morbidity outcomes attributed to  
4  
5 245 schistosomiasis.  
6  
7 246 Schistosomiasis can cause anaemia. To manage the expected differential benefits of the  
8  
9 247 interventions for anaemia, a full blood count will be performed at baseline, as discussed above;  
10  
11 248 anaemic children will be managed appropriately and severely anaemic children excluded.  
12  
13 249 Albendazole will be provided twice a year to manage nematode infections (after collection of  
14  
15 250 primary and secondary endpoint samples).

### 16 251 ***Procedures to be followed in the event of abnormal findings***

17  
18 252 Abnormal clinical findings from medical history, examination or blood tests will be assessed as to  
19  
20 253 their clinical significance throughout the trials. If an abnormal test result is deemed clinically  
21  
22 254 significant, it may be repeated. If a test remains clinically significant, the participant will be informed  
23  
24 255 and appropriate medical care arranged as appropriate and with the permission of the participant.  
25  
26 256 Specific details regarding findings, discussion with participants and resulting actions will be recorded  
27  
28 257 in the clinical records. Decisions to exclude the participant from enrolling in the trial or to withdraw  
29  
30 258 a participant from the trial will be at the discretion of the Investigator.

### 31 259 ***Data and Safety Monitoring Board (DSMB)***

32  
33 260 A data and safety monitoring board (DSMB) has been appointed to provide real-time safety  
34  
35 261 oversight. The DSMB will be notified within 7 days of the Investigators' being aware of the  
36  
37 262 occurrence of SAEs. The DSMB may recommend the Investigators to place the trial on hold if  
38  
39 263 deemed necessary following an intervention-related SAE. The DSMB will be chaired by a clinician  
40  
41 264 experienced in clinical trials. There will be a minimum of two other appropriately qualified  
42  
43 265 committee members. In the case of events related to a blinded intervention, the DSMB can request  
44  
45 266 unblinding. Membership will include a statistician, and at least one Ugandan member. All  
46  
47 267 correspondence between Investigators and the DSMB will be conveyed by the Principal Investigator  
48  
49 268 to the trial Sponsor. The Chair of the DSMB will be contacted for advice and independent review by  
50  
51 269 the Investigator or trial Sponsor in the following situations:

- 52 270 • The occurrence of any SAE
- 53 271 • Any other situation where the Investigator or trial Sponsor feels independent advice or
- 54 272 review is important

### 55 273 ***Ethical and regulatory considerations***

56  
57  
58 274 *Further information regarding risks*  
59  
60

1  
2  
3 275 The immunisations to be given have recognised side effects which are usually mild and resolve  
4  
5 276 spontaneously in a few days to one week. Parenteral vaccines are likely to result in pain and  
6  
7 277 swelling at the site of injection and mild fever; very occasionally pain and swelling can be severe and  
8  
9 278 associated with difficulty in moving the shoulder. Sometimes headache and tiredness occur. Rarely  
10  
11 279 a vaccine may cause a severe allergic reaction. For most vaccines this is estimated at less than one  
12  
13 280 in a million doses (but 1 in 55,000 for Yellow Fever vaccine).<sup>29</sup> Individuals with a history of a  
14  
15 281 possible allergic reaction to drugs or vaccines, or to vaccine components including eggs or chicken  
16  
17 282 proteins, will be excluded from the studies. The research team will be trained and prepared to  
18  
19 283 manage severe allergic reactions.

20  
21 284 Adverse reactions to Yellow Fever vaccine include severe nervous system reaction (about 1 person in  
22  
23 285 125,000) and severe, life-threatening illness with organ failure (about 1 person in 250,000). The  
24  
25 286 mortality for this severe, life-threatening adverse effect is reported as about 50%.<sup>29</sup>

26  
27 287 BCG immunisation is likely to induce a scar in many cases. This may develop over several weeks,  
28  
29 288 starting as a small papule at the injection site which may become ulcerated and then heal over a  
30  
31 289 period of 2 to 5 months; and lymphadenopathy may develop. Occasionally a more severe local  
32  
33 290 reaction occurs (estimated at 1 per 1,000-10,000 doses): for example, an abscess develops and scars  
34  
35 291 may develop into keloids. Rarely BCG can cause disseminated disease (1 per 230,000 to 640,000  
36  
37 292 doses), or disease in sites remote from the immunisation site. Disseminated BCG disease usually  
38  
39 293 occurs in immunocompromised people: HIV positive people will be excluded from these studies.<sup>30</sup>  
40  
41 294 BCG "pre-immunisation" may interfere with the response to the subsequent live vaccines; indeed  
42  
43 295 our hypothesis, and published results, suggest that it may suppress replication of YF 17D vaccine.<sup>31</sup>  
44  
45 296 However, this reduced replication has not been shown to correlate with, or result in, reduced levels  
46  
47 297 of neutralising antibody titres (which are the desired protective outcome).<sup>13 31</sup>

48  
49 298 Oral typhoid vaccine (Ty21a) may occasionally be associated with stomach pain, nausea, vomiting  
50  
51 299 and (rarely) rash.<sup>29</sup>

52  
53 300 Praziquantel has been in use for about 30 years. It has a well-recognised profile of side effects  
54  
55 301 including dizziness, nausea, vomiting, abdominal pain, diarrhoea (sometimes with blood) and  
56  
57 302 urticarial rash. The symptoms are considered to arise largely from the effects of killing worms and to  
58  
59 303 be more severe in people with heavy infections. Symptoms are better tolerated when the drugs are  
60  
304 given after food and we will provide treatment after a meal or snack. Simple medications, such as  
305 paracetamol and cetirizine, can alleviate symptoms and these will be available on treatment days.

306 **References**

- 1  
2  
3  
4  
5  
6 307 1. Wajja A, Kizito D, Nassanga B, et al. The effect of current *Schistosoma mansoni* infection on the  
7 308 immunogenicity of a candidate TB vaccine, MVA85A, in BCG-vaccinated adolescents: An open-label trial.  
8 309 *PLoS neglected tropical diseases* 2017;11(5):e0005440. doi: 10.1371/journal.pntd.0005440 [published Online  
9 310 First: 2017/05/05]
- 10  
11 311 2. WHO. Growth reference 5-19 years. 2007
- 12  
13 312 3. WHO. Global tuberculosis report 2016 [http://www.who.int/tb/publications/global\\_report/en/](http://www.who.int/tb/publications/global_report/en/) (accessed 17  
14 313 June 2017), 2016.
- 15  
16 314 4. Alcais A, Fieschi C, Abel L, et al. Tuberculosis in children and adults: two distinct genetic diseases. *J Exp Med*  
17 315 2005;202(12):1617-21. doi: 10.1084/jem.20052302
- 18  
19 316 5. Weiner J, 3rd, Kaufmann SH. Recent advances towards tuberculosis control: vaccines and biomarkers. *J*  
20 317 *Intern Med* 2014;275(5):467-80. doi: 10.1111/joim.12212
- 21  
22 318 6. Fine PE. Variation in protection by BCG: implications of and for heterologous immunity. *Lancet (London,*  
23 319 *England)* 1995;346(8986):1339-45.
- 24  
25 320 7. Barreto ML, Pilger D, Pereira SM, et al. Causes of variation in BCG vaccine efficacy: examining evidence from  
26 321 the BCG REVAC cluster randomized trial to explore the masking and the blocking hypotheses. *Vaccine*  
27 322 2014;32(30):3759-64. doi: 10.1016/j.vaccine.2014.05.042
- 28  
29 323 8. Black GF, Weir RE, Floyd S, et al. BCG-induced increase in interferon-gamma response to mycobacterial  
30 324 antigens and efficacy of BCG vaccination in Malawi and the UK: two randomised controlled studies. *Lancet*  
31 325 *(London, England)* 2002;359(9315):1393-401. doi: 10.1016/S0140-6736(02)08353-8
- 32  
33 326 9. Tanner R, Kakalacheva K, Miller E, et al. Serum indoleamine 2,3-dioxygenase activity is associated with  
34 327 reduced immunogenicity following vaccination with MVA85A. *BMC infectious diseases* 2014;14:660. doi:  
35 328 10.1186/s12879-014-0660-7 [published Online First: 2014/12/04]
- 36  
37 329 10. WHO. SAGE Evidence to recommendations framework. 2017.  
38 330 [http://www.who.int/immunization/sage/meetings/2017/october/2](http://www.who.int/immunization/sage/meetings/2017/october/2_EvidencetoRecommendationFramework_BCG.pdf) [EvidencetoRecommendationFramework](http://www.who.int/immunization/sage/meetings/2017/october/2_EvidencetoRecommendationFramework_BCG.pdf)  
39 331 [\\_BCG.pdf](http://www.who.int/immunization/sage/meetings/2017/october/2_EvidencetoRecommendationFramework_BCG.pdf) (accessed 16th March 2018).
- 40  
41 332 11. Dye C. Making wider use of the world's most widely used vaccine: Bacille Calmette-Guerin revaccination  
42 333 reconsidered. *Journal of the Royal Society, Interface* 2013;10(87):20130365. doi: 10.1098/rsif.2013.0365  
43 334 [published Online First: 2013/08/02]
- 44  
45 335 12. Kraemer MU, Faria NR, Reiner RC, Jr., et al. Spread of yellow fever virus outbreak in Angola and the  
46 336 Democratic Republic of the Congo 2015-16: a modelling study. *The Lancet Infectious diseases* 2016 doi:  
47 337 10.1016/s1473-3099(16)30513-8 [published Online First: 2016/12/27]
- 48  
49 338 13. Muyanja E, Ssemaganda A, Ngauv P, et al. Immune activation alters cellular and humoral responses to  
50 339 yellow fever 17D vaccine. *The Journal of clinical investigation* 2014;124(7):3147-58. doi: 10.1172/jci75429  
51 340 [published Online First: 2014/06/10]
- 52  
53 341 14. Aguiar M, Stollenwerk N, Halstead SB. The Impact of the Newly Licensed Dengue Vaccine in Endemic  
54 342 Countries. *PLoS neglected tropical diseases* 2016;10(12):e0005179. doi: 10.1371/journal.pntd.0005179  
55 343 [published Online First: 2016/12/22]
- 56  
57 344 15. Dharmasena MN, Osorio M, Filipova S, et al. Stable expression of *Shigella dysenteriae* serotype 1 O-antigen  
58 345 genes integrated into the chromosome of live *Salmonella* oral vaccine vector Ty21a. *Pathogens and disease*  
59 346 2016 doi: 10.1093/femspd/ftw098 [published Online First: 2016/09/23]

- 1  
2  
3 347 16. Carias C, Walters MS, Wefula E, et al. Economic evaluation of typhoid vaccination in a prolonged typhoid  
4 348 outbreak setting: the case of Kasese district in Uganda. *Vaccine* 2015;33(17):2079-85. doi:  
5 349 10.1016/j.vaccine.2015.02.027 [published Online First: 2015/02/26]  
6  
7 350 17. Melhem RF, LoVerde PT. Mechanism of interaction of Salmonella and Schistosoma species. *Infection and*  
8 351 *immunity* 1984;44(2):274-81. [published Online First: 1984/05/01]  
9  
10 352 18. Muniz-Junqueira MI, Tavares-Neto J, Prata A, et al. Antibody response to Salmonella typhi in human  
11 353 schistosomiasis mansoni. *Revista da Sociedade Brasileira de Medicina Tropical* 1996;29(5):441-5. [published  
12 354 Online First: 1996/09/01]  
13  
14 355 19. WHO. Position Paper on Typhoid vaccines: WHO position paper – March 2018 2018  
15  
16 356 20. Brown J, Baisley K, Kavishe B, et al. Impact of malaria and helminth infections on immunogenicity of the  
17 357 human papillomavirus-16/18 AS04-adjuvanted vaccine in Tanzania. *Vaccine* 2014;32(5):611-7. doi:  
18 358 10.1016/j.vaccine.2013.11.061  
19  
20 359 21. Riner DK, Ndombi EM, Carter JM, et al. Schistosoma mansoni Infection Can Jeopardize the Duration of  
21 360 Protective Levels of Antibody Responses to Immunizations against Hepatitis B and Tetanus Toxoid. *PLoS*  
22 361 *neglected tropical diseases* 2016;10(12):e0005180. doi: 10.1371/journal.pntd.0005180  
23  
24 362 22. Centre HI. HPV and related diseases report: Uganda. 2016.  
25 363 <http://www.hpvcnre.net/statistics/reports/UGA.pdf> (accessed 20.01.2017).  
26  
27 364 23. WHO. Human papillomavirus vaccines: WHO position paper, May 2017. *Releve epidemiologique*  
28 365 *hebdomadaire* 2017;92(19):241-68. [published Online First: 2017/05/23]  
29  
30 366 24. Sabin EA, Araujo MI, Carvalho EM, et al. Impairment of tetanus toxoid-specific Th1-like immune responses  
31 367 in humans infected with Schistosoma mansoni. *The Journal of infectious diseases* 1996;173(1):269-72.  
32 368 [published Online First: 1996/01/01]  
33  
34 369 25. Nanteza B, Galukande M, Aceng J, et al. The burden of tetanus in Uganda. *SpringerPlus* 2016;5(1):705. doi:  
35 370 10.1186/s40064-016-2309-z [published Online First: 2016/06/29]  
36  
37 371 26. Ministry of Health–Uganda. Uganda Clinical Guidelines 2016.  
38 372 <http://apps.who.int/medicinedocs/documents/s23532en/s23532en.pdf>  
39  
40 373 27. WHO. Haemoglobin concentrations for the diagnosis of anaemia and assessment of severity. Vitamin and  
41 374 Mineral Nutrition Information System. Geneva, World Health Organization, 2011  
42 375 (WHO/NMH/NHD/MNM/11.1).  
43  
44 376 28. Sanya RE, Nkurunungi G, Hoek Spaans R, et al. The Impact of Intensive Versus Standard Anthelmintic  
45 377 Treatment on Allergy-related Outcomes, Helminth Infection Intensity, and Helminth-related Morbidity in  
46 378 Lake Victoria Fishing Communities, Uganda: Results From the LaVIISWA Cluster-randomized Trial. *Clinical*  
47 379 *Infectious Diseases* 2018:ciy761-ciy61. doi: 10.1093/cid/ciy761  
48  
49 380 29. CDC. Centers for Disease Control and Prevention, vaccines and immunizations.  
50  
51 381 30. WHO. Information sheet observed rate of vaccine reactions Bacille Calmette-Guérin (BCG) vaccine. 2012  
52  
53 382 31. Arts RJW, Moorlag S, Novakovic B, et al. BCG Vaccination Protects against Experimental Viral Infection in  
54 383 Humans through the Induction of Cytokines Associated with Trained Immunity. *Cell host & microbe*  
55 384 2018;23(1):89-100.e5. doi: 10.1016/j.chom.2017.12.010 [published Online First: 2018/01/13]  
56 385  
57  
58  
59  
60



## MRC/UVRI and LSHTM Uganda Research Unit



**Population differences in vaccine responses: the effect of intensive treatment for schistosomiasis on response to vaccines among island adolescents**

**Short Title: POPVAC Project A**

**Information Sheet for participants 9 – 12 years**

**1. Why are we meeting with you?**

We are inviting you to take part in a research which is being done by a team from Uganda Virus Research Institute (UVRI), working together with colleagues from the London School of Hygiene and Tropical Medicine, UK. We are meeting you because you are aged between 9 and 12 years and study in a primary school on Koome island. After we tell you about it, we will ask if you'd like to be in this study or not. Only If you agree to take part, will you sign the assent form to show us that you are happy to do so.

The people leading this research study are Professor Alison Elliott and Dr Ludoviko Zirimenya.

**2. Why are we doing this research?**

We want to **find out whether treating Bilharzia much more frequently (a total of 7 times in a year) can get rid of it completely and whether this will improve vaccine responses.**

In the whole study, there will be about 480 children from schools of Koome islands.

**3. What is going to happen in this research study?**

Only if you agree, a full health check-up that will involve taking stool, urine and blood samples will be done. If everything is okay, the following will be done:

You will be put into one of the two **Bilharzia treatment** groups by chance

- One group will be treated for Bilharzia using praziquantel (the recommended medicine for Bilharzia) seven times in the year, and an eighth time after the end of the study.
- The other group will be treated for Bilharzia using praziquantel once in the year, and a second time after the end of the study.

You will be immunised with **five (5) vaccines**. These are:

- BCG vaccine. This is intended to protect against tuberculosis.
- Yellow fever vaccine. This protects against Yellow Fever an infection carried by mosquitoes.
- HPV vaccine. Human Papilloma Virus (HPV) causes growths in private parts and cancer in girls and boys.
- Tetanus and diphtheria vaccines. Tetanus and diphtheria are bacterial infections that cause very serious disease.
- Typhoid vaccine. Typhoid is a serious form of fever which is spread through contaminated food.

These immunisations will be given on different times during the entire duration of the study.

POPVAC Project A, assent age 9-12 years v1.3, 1<sup>st</sup> July 2019 | Page 1 of 5

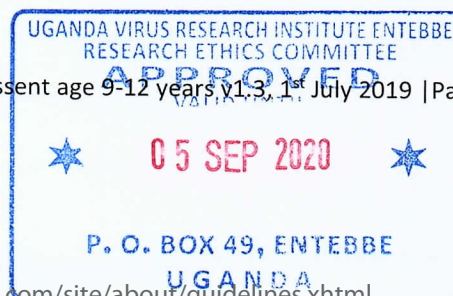



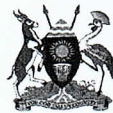Uganda  
Virus  
Research  
InstituteLONDON  
SCHOOL of  
HYGIENE  
& TROPICAL  
MEDICINE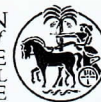

Most of the vaccines will be injected into your upper arm (either right or left side). The typhoid vaccine is an oral vaccine: it is in the form of capsules which are swallowed. You will be given one capsule per day for three alternating days.

#### You will be asked to give **blood samples**

We will ask you to give blood samples before and after you are given the vaccines. The amount of blood that we will take at each visit is completely safe and will vary between 4 and 27 millilitres (1 teaspoon and 5 and a half teaspoons) at the different visits.

#### You will be asked to give **stool and urine samples**

At some visits we will ask you for additional stool and urine samples for testing to check whether the worm infections have responded to treatment or (for girls) whether you have become pregnant.

#### Some of you will be asked to take part in a special **sugar test** of absorption from the intestines

We think that worm infections may make our intestines a little bit leaky, and this might explain some of their effects. We can test this using a special sugar drink. We will ask about 200 people to do this additional test. If you are asked to do this, it will be done about 8 weeks after your first vaccine is given. You will be asked not to eat overnight or in the morning of the test day. Then you will be given a special drink that contains sugars early in the morning. Afterwards you will also be asked to drink a litre of water (equal to two Rwenzori bottles) over the following few hours. All the urine that you pass during the next five hours will be collected. The volume (amount) of urine will be measured and the amount of sugar in it will be tested, to find out how much of the sugar your body has absorbed.

#### **4. What will the blood, stool and urine samples be used for?**

The samples will be used to test for infections, including HIV, malaria and worms, to test for anaemia (the strength of your blood) and to test for pregnancy (among girls). The blood samples will also be used to test how your body responds to vaccines. For some participants, the sugar test will be used to test absorption from the intestines.

#### **5. Will taking part in this study harm me?**

We do not expect this to harm you, though you will experience the following:

- You will need to take time off classes during each visit by the study team.
- Taking blood samples is not expected to cause any problem for you, apart from the discomfort or pain, bruising or bleeding, redness at the place where the needle goes into the skin, but this will go away in a few days.
- During the sugar test, you will be asked not to eat overnight and during the morning of the test so you may get hungry (although water and a snack will be provided). This may make you feel a little sick and stools may become a bit loose.
- If you are a girl, even if you know you could not be pregnant, we will do a pregnancy test. We have to be quite sure. You must as well promise that you can avoid getting pregnant while taking part in this study.

POPVAC Project A - assent age 9-12 years v1.3, 1<sup>st</sup> July 2019 | Page 2 of 5

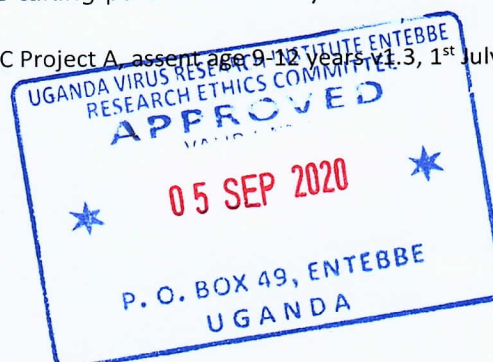



## MRC/UVRI and LSHTM Uganda Research Unit



- Treatment of Bilharzia with praziquantel may make you feel dizzy or sick, give you abdominal pain or diarrhoea, or occasionally cause an itchy rash. The research team will have medicines available to help you if you have a strong reaction to the treatment.
- All the study vaccines are known to be safe. However, even approved vaccines may very occasionally cause a serious reaction, such as an allergic reaction. The research doctors and nurses will be available to help if this happens.

### 6. Will the study help me?

The treatment for Bilharzia is likely to be good for you, whichever group you are put in. The vaccines are likely to help you by protecting you from infectious diseases. The research results may help all people in the world, because in the end we may get a better understanding whether treating Bilharzia much more frequently (a total of 7 times in a year) can get rid of it completely and whether this will improve vaccine responses.

### 7. What is the cost of taking part in the trial?

There is no cost to participate in this trial. You will receive a soft drink and the gift of a pen or other simple school material on days when blood samples are drawn, and the gift of a T-shirt at the end of the study when everything is done, in appreciation of your contribution to the work.

### 8. What happens if I refuse to take part?

It is very important for you to know that you do not have to take part in the research, the choice is yours. No-one will be upset if you decide not to take part. If you agree to take part and later decide that you do not want to take part anymore, that is also okay.

### 9. What happens if something goes wrong?

The researchers will make every effort to ensure your safety and well-being. MRC/UVRI and LSHTM has a specialist insurance policy in place which would help to pay for treatment if any harm came to you as a result of taking part in the research.

### 10. Who will have access to your information and samples from this research?

Only research staff trained to keep the information confidential will have access to the records. Your name will be removed from the records and samples, so no-one will be able to find out information about you from our records.

### 11. Who has reviewed the trial?

This trial has been reviewed by the Uganda National Council for Science and Technology, The Uganda National Drug Authority, the Uganda Virus Research Institute Research and Ethics Committee the ethics committee of the London School of Hygiene and Tropical Medicine in the United Kingdom.

**You can find out more about the study at any time by asking one of the members of the research team. You may also contact Professor Alison Elliott (telephone: 0417 704000) who is in charge of the study, or the Chairperson of the Ethics Committee for the Uganda Virus Research Institute on 0414 321962.**



POPVAC Project A, assent age 9-12 years v1.3, 1<sup>st</sup> July 2019 | Page 3 of 5

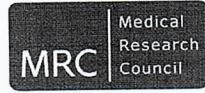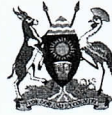

Uganda  
Virus  
Research  
Institute

LONDON  
SCHOOL of  
HYGIENE  
& TROPICAL  
MEDICINE

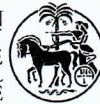

**Population differences in vaccine responses: the effect of intensive treatment for schistosomiasis on response to vaccines among island adolescents**

**Short Title: POPVAC Project A**

**Participant Assent**

A copy of this form will be given to you. Please keep a copy of the form because it contains the information that was discussed with you and you may want to look at it again.

**AGREEMENT TO TAKE PART:**

**I have read and understood (or been read to and understand) the information sheet for this study. My questions have been answered. I understand that taking part in the study is voluntary. I understand that at any time I may withdraw from this study without giving a reason. I agree to participate in this study.**

**Name:** \_\_\_\_\_ **PVA ID:** |A|\_|\_|\_|\_|\_|\_|\_|\_|  
(please write your name in capital letters here if you agree)

**Signature:** \_\_\_\_\_ **Date:** \_\_\_\_\_  
(please sign or write your name here if you agree; or use a thumbprint)

**What if I have any questions?**

If you have any questions about your participation in this study, please feel free to ask any member of the research team at any time. If you prefer, you may speak to the principal investigator for this study (Professor Alison Elliott, telephone 0417 704000).

**What if we want to ask someone independent anything about this research, or have any questions about your rights as a research participant?** You may speak with the Chairman of the Science and Ethics Committee at Uganda Virus Research Institute on 0414 321962.

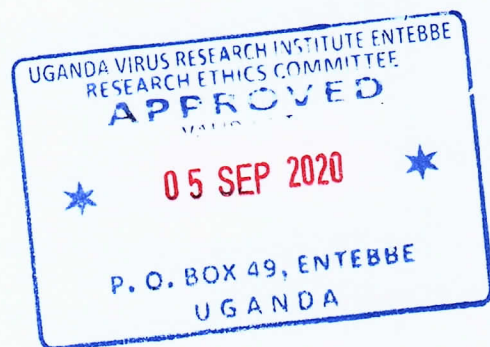



PVA ID: |A|\_|\_|\_|\_|

**Witness:**

I have read the participant information sheet and the assent statement above

to:..... (PRINT NAME OF PARTICIPANT) in a language which he/she understands. I believe that he/she gives assent to take part in the study.

.....  
**Witness name**

.....  
**Signature**

.....  
**Date**

*Witness required only for those using a thumb print instead of the final signature, or unable to read the information and consent form, or if the person taking consent does not speak the participant's language. The witness must not be a member of the research staff or a study participant. The witness must be present for the whole consent process.*

**Person taking the assent:**

.....  
**Researcher name**

.....  
**Signature**

.....  
**Date**

**Comment:**



POPVAC Project A, assent age 9-12 years v1.3, 1<sup>st</sup> July 2019 | Page 5 of 5

1  
2  
3  
4  
5  
6  
7  
8  
9  
10  
11  
12  
13  
14  
15  
16  
17  
18  
19  
20  
21  
22  
23  
24  
25  
26  
27  
28  
29  
30  
31  
32  
33  
34  
35  
36  
37  
38  
39  
40  
41  
42  
43  
44  
45  
46  
47  
48  
49  
50  
51  
52  
53  
54  
55  
56  
57  
58  
59  
60

## MRC/UVRI and LSHTM Uganda Research Unit

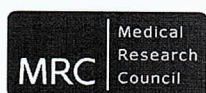

Uganda  
Virus  
Research  
Institute

LONDON  
SCHOOL of  
HYGIENE  
& TROPICAL  
MEDICINE

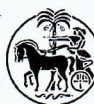

**Population differences in vaccine responses: the effect of intensive treatment for schistosomiasis on response to vaccines among island adolescents**

**Short Title: POPVAC Project A**

**Information Sheet for participants aged 13 to 17 years**

We are inviting you to join in some research which is being done by a team from Uganda Virus Research Institute (UVRI), working together with colleagues from the London School of Hygiene and Tropical Medicine, UK. This form will tell you about the research. If you have any questions, please ask the person who is telling you about this research. Then you can decide whether you want to take part or not. There is no need to take part unless you really wish to. If you agree to take part, you will need to sign the assent form to show us that you are happy to do so. If you decide you do not want to take part, do not sign the assent form.

The people leading this research study are Professor Alison Elliott and Dr Ludoviko Zirimenya.

**1. What this research is about, and the reason for doing this research.**

This research is about how worm infections like Bilharzia "switch off" the body's defence systems and how this affects vaccine responses. **We want to find out whether treating Bilharzia much more frequently (a total of 7 times in a year) can get rid of it completely and whether this will improve vaccine responses.**

**2. Why have I been asked to take part in this study?**

You have been asked because you are attending primary school in Koome islands.

**3. What is going to happen in this research study?**

Only if you agree, a comprehensive health check-up that will involve taking stool, urine and blood samples will be done. If everything is okay, the following will be done:

You will be put into one of the two **Bilharzia treatment** groups by luck

- One group will be treated for Bilharzia using praziquantel (the recommended medicine for Bilharzia) seven times in the year, and an eighth time after the end of the study.
- The other group will be treated for Bilharzia using praziquantel once in the year, and a second time after the end of the study.

You will be immunised with **several vaccines**. These are the vaccines:

- BCG vaccine. This is intended to protect against tuberculosis.
- Yellow fever vaccine. This protects against Yellow Fever virus carried by mosquitoes.
- HPV vaccine. Human Papilloma Virus (HPV) causes growths in private parts and cancer in girls and boys.
- Tetanus and diphtheria vaccines. Tetanus and diphtheria are bacterial infections that cause very serious disease.
- Typhoid vaccine. Typhoid is a serious form of fever which is spread through contaminated food.

These immunisations will be given on three different days

POPVAC Project A, assent age 13-17 years v1.3, 15 July 2019 | Page 1 of 6





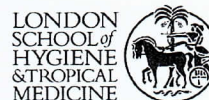

Most of the vaccines will be injected into your upper arm (either right or left side). This will be a bit painful, as for any injection of medicine that you may have had, and will feel a bit sore over the next week or so. The typhoid vaccine is an oral vaccine: it is in the form of capsules which are swallowed. You will be given one capsule per day for three alternating days.

You will be asked to give **blood samples**

We will ask you to give blood samples before and after you are given the vaccines. The amount of blood that we will take at each visit is completely safe and will vary between 4 and 27 millilitres (1 teaspoon and 5 and a half teaspoons) at the different visits

You will be asked to give **stool and urine samples**

At some visits we will ask you for additional stool and urine samples for testing to check whether the worm infections have responded to treatment or (for girls) whether you have become pregnant.

Some of you will be asked to take part in a special **sugar test** of absorption from the intestines

We think that worm infections may make our intestines a little bit leaky, and this might explain some of their effects. We can test this using a special sugar drink. We will ask about 200 people to do this additional test. If you are asked to do this, it will be done about 8 weeks after your first vaccine is given. You will be asked not to eat overnight or in the morning of the test day. Then you will be given a special drink that contains sugars early in the morning. Afterwards you will also be asked to drink a litre of water (equal to two Rwenzori bottles) over the following few hours. All the urine that you pass during the next five hours will be collected. The volume (amount) of urine will be measured and the amount of sugar in it will be tested, to find out how much of the sugar your body has absorbed.

**4. What will the blood, stool and urine samples be used for?**

The samples will be used to test for infections, including HIV, malaria and worms, to test for anaemia (the strength of your blood) and to test for pregnancy (among girls). The blood samples will also be used to test how your body responds to vaccines. For some participants, the sugar test will be used to test absorption from the intestines.

**5. How many people will take part in the study, and how long will it last?**

The whole study will enrol 480 people, and the study will last for about two years.

**6. What are the risks of participating in this trial?**

You will need to take time off classes during each visit by the study team.

Taking blood samples is not expected to cause any problem for you, apart from the discomfort or pain, bruising or bleeding, redness at the place where the needle goes into the skin, but this will go away in a few days.

During the sugar test you will be asked not to eat overnight and during the morning of the test so you may get hungry (although water and a snack will be provided). Most people have no problems with this test although a few may feel a little sick and stools may become a bit loose.

POPVAC Project A, assent age 13-17 years v1.3 | 1<sup>st</sup> July 2019 | Page 2 of 6





## MRC/UVRI and LSHTM Uganda Research Unit

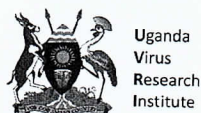

If you are a girl, even if you know you could not be pregnant. We have to be quite sure. We will test for pregnancy at the beginning of the study and on each immunisation day. You must as well promise that you can avoid getting pregnant while taking part in this study.

Treatment of Bilharzia with praziquantel may make you feel dizzy or sick, give you abdominal pain or diarrhoea, or occasionally cause an itchy rash. This is most likely caused by your body's response to the worms as they are being killed by the medicine. The research team will have medicines available to help you if you have a strong reaction to the treatment.

All the study vaccines are known to be safe though not often, may cause a serious reaction, such as an allergic reaction. The research doctors and nurses will be available to help if this happens.

### **7. What are the benefits of taking part in this trial?**

The treatment for Bilharzia is likely to be good for you, whichever group you are put in. The vaccines are likely to help you by protecting you from infectious diseases.

Also, you will be helping us to find out why vaccines sometimes don't work so well in countries like Uganda, and whether vaccines work better if worms are treated first. This may help other people in the future.

### **8. What is the cost of taking part in the trial?**

There is no cost to participate in this trial. You will receive a soft drink and the gift of a pen or other simple school material on days when blood samples are drawn, and the gift of a T-shirt at the end of the study when everything is done, in appreciation of your contribution to the work.

### **9. What happens if I refuse to take part?**

It is very important for you to know that you do not have to take part in the research, the choice is yours. No-one will be upset if you decide not to take part. If you agree to take part and later decide that you do not want to take part anymore, that is also okay.

### **10. What happens if something goes wrong?**

You will be making an important contribution to medical research. The researchers will make every effort to ensure your safety and well-being. MRC/UVRI and LSHTM has a specialist insurance policy in place which would help to pay for treatment if any harm came to you as a result of taking part in the research.

### **11. Who will have access to my information and samples from this research?**

All our research records are stored securely in rooms with restricted access and on password protected computers. Only research staff trained to keep the information confidential will have access to the records. Your name will be removed from the records, so no-one will be able to find out information about you from our records.

### **12. Who has reviewed the trial?**

This trial has been reviewed by the Uganda National Council for Science and Technology, Uganda National Drug Authority the Uganda Virus Research Institute Research and Ethics Committee the ethics committee of the London School of Hygiene and Tropical Medicine in the United Kingdom.

POPVAC Project A, assent age 13-17 years v1.3 - 1<sup>st</sup> JULY 2019 | Page 3 of 6



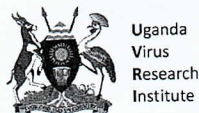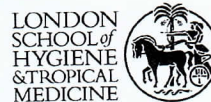

**You can find out more about the study at any time by asking one of the members of the research team. You may also contact Professor Alison Elliott (telephone: 0417 704000) who is in charge of the study, or the Chairperson of the Ethics Committee for the Uganda Virus Research Institute on 0414 321962.**

1  
2  
3  
4  
5  
6  
7  
8  
9  
10  
11  
12  
13  
14  
15  
16  
17  
18  
19  
20  
21  
22  
23  
24  
25  
26  
27  
28  
29  
30  
31  
32  
33  
34  
35  
36  
37  
38  
39  
40  
41  
42  
43  
44  
45  
46  
47  
48  
49  
50  
51  
52  
53  
54  
55  
56  
57  
58  
59  
60

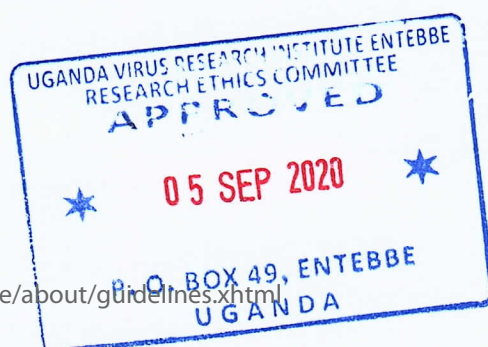





PVA ID: |A|\_|\_|\_|\_|\_|

**Witness:**

I have read the participant information sheet and the assent statement above

to:..... (PRINT NAME OF PARTICIPANT) in a language which he/she understands. I believe that he/she gives assent to take part in the study.

|                     |                  |             |
|---------------------|------------------|-------------|
| .....               | .....            | .....       |
| <b>Witness name</b> | <b>Signature</b> | <b>Date</b> |

*Witness required only for those using a thumb print instead of the final signature, or unable to read the information and consent form, or if the person taking consent does not speak the participant's language. The witness must not be a member of the research staff or a study participant. The witness must be present for the whole consent process.*

**Person taking the assent:**

|                        |                  |             |
|------------------------|------------------|-------------|
| .....                  | .....            | .....       |
| <b>Researcher name</b> | <b>Signature</b> | <b>Date</b> |

**Comment:**





## MRC/UVRI and LSHTM Uganda Research Unit

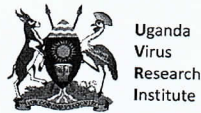

## Population differences in vaccine responses: the effect of intensive treatment for schistosomiasis on response to vaccines among island adolescents

### Short Title: POPVAC Project A

#### Information Sheet for emancipated or mature minors

We are inviting you to join in some research which is being done by a team from Uganda Virus Research Institute (UVRI), working together with colleagues from the London School of Hygiene and Tropical Medicine, UK. This form will tell you about the research. If you have any questions, please ask the person who is telling you about this research. Then you can decide whether you want to take part or not. If you agree to take part, you will need to sign the consent form to show us that you are happy to do so. If you decide that you do not want to take part, do not sign the consent form.

The people leading this research study are Professor Alison Elliott and Dr Ludoviko Zirimenya.

#### 1. What is this research about?

This research is about how worm infections like Bilharzia “switch off” the body’s defence systems and how this affects vaccine responses. **We want to find out whether treating Bilharzia much more frequently (a total of 7 times in a year) can get rid of it completely and whether this will improve vaccine responses.**

#### 2. Why have I been asked to take part in this study?

You have been asked because you are attending primary school in Koome islands.

#### 3. What is going to happen in this research study?

Only if you agree, you will have a comprehensive health check-up that will involve taking stool, urine and blood samples. If everything is okay, the following will be done:

You will be put into one of the two Bilharzia treatment groups by chance

One group will be treated for Bilharzia using praziquantel (the recommended medicine for Bilharzia) seven times in the year, and an eighth time after the end of the study.

The other group will be treated for Bilharzia using praziquantel once in the year, and a second time after the end of the study.



POPVAC Project A, consent for emancipated minors v1.1, 1<sup>st</sup> July 2019 | Page 1 of 6

Uganda  
Virus  
Research  
Institute

You will be immunised with **five (5) vaccines**. These are:

- **BCG vaccine.** This is intended to protect against tuberculosis.
- **Yellow fever vaccine.** This protects against Yellow Fever an infection carried by mosquitoes.
- **HPV vaccine.** Human Papilloma Virus (HPV) causes growths in private parts and cancer in girls and boys.
- **Tetanus and diphtheria vaccines.** Tetanus and diphtheria are bacterial infections that cause very serious disease.
- **Typhoid vaccine.** Typhoid is a serious form of fever which is spread through contaminated food.

These immunisations will be given on different times during the entire duration of the study.

Most of the vaccines will be injected into your upper arm (either right or left side). The typhoid vaccine is an oral vaccine: it is in the form of capsules which are swallowed. You will be given one capsule per day for three alternating days.

#### You will be asked to give **blood samples**

We will ask you to give blood samples before and after you are given the vaccines. The amount of blood that we will take at each visit is completely safe and will vary between 4 and 27 millilitres (1 teaspoon and 5 and a half teaspoons) at the different visits.

#### You will be asked to give **stool and urine samples**

At some visits we will ask you for additional stool and urine samples for testing to check whether the worm infections have responded to treatment or (for girls) whether you have become pregnant.

#### Some of you will be asked to take part in a special **sugar test** of absorption from the intestines

We think that worm infections may make our intestines a little bit leaky, and this might explain some of their effects. We can test this using a special sugar drink. We will ask about 200 people to do this additional test. If you are asked to do this, it will be done about 8 weeks after your first vaccine is given. You will be asked not to eat overnight or in the morning of the test day. Then you will be given a special drink that contains sugars early in the morning. Afterwards you will also be asked to drink a litre of water (equal to two Rwenzori bottles) over the following few hours. All the urine that you pass during the next five hours will be collected. The volume (amount) of urine will be measured and the amount of sugar in it will be tested, to find out how much of the sugar your body has absorbed.

POPVAC Project A, consent for emancipated minors v1.1, 1<sup>st</sup> July 2019 | Page 2 of 6





## MRC/UVRI and LSHTM Uganda Research Unit

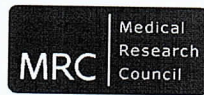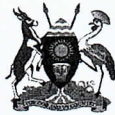

Uganda  
Virus  
Research  
Institute

LONDON  
SCHOOL of  
HYGIENE  
& TROPICAL  
MEDICINE



#### 4. What will the blood, stool and urine samples be used for?

The samples will be used to test for infections, including HIV, malaria and worms, to test for anaemia (the strength of your blood) and to test for pregnancy (among girls). The blood samples will also be used to test how your body responds to vaccines.

#### 5. How many people will take part in the study, and how long will it last?

The whole study will enrol 480 people, and the study will last for about two years.

#### 6. What are the risks of participating in this trial?

- You will need to take time off classes during each visit by the study team.
- Taking blood samples is not expected to cause any problem for you, apart from the discomfort or pain, bruising or bleeding, redness at the place where the needle goes into the skin, but this will go away in a few days.
- During the sugar test, you will be asked not to eat overnight and during the morning of the test so you may get hungry (although water and a snack will be provided). This may make you feel a little sick and stools may become a bit loose.
- If you are a girl, even if you know you could not be pregnant, we will do a pregnancy test. We have to be quite sure. You must as well promise that you can avoid getting pregnant while taking part in this study.
- Treatment of Bilharzia with praziquantel may make you feel dizzy or sick, give you abdominal pain or diarrhoea, or occasionally cause an itchy rash. The research team will have medicines available to help you if you have a strong reaction to the treatment.
- All the study vaccines are known to be safe. However, very occasionally even approved vaccines may cause a serious reaction, such as an allergic reaction. The research doctors and nurses will be available to help if this happens.

#### 7. What are the benefits of taking part in this trial?

The treatment for Bilharzia is likely to be good for you, whichever group you are put in. The vaccines are likely to help you by protecting you from infectious diseases.

Also, you will be helping us to find out why vaccines sometimes don't work so well in countries like Uganda, and whether vaccines work better if worms are treated first. This may help other people in the future.



POPVAC Project A, consent for emancipated minors v1.1, 1<sup>st</sup> July 2019 | Page 3 of 6



## 8. What is the cost of taking part in the trial?

There is no cost to participate in this trial. You will receive a soft drink and the gift of a pen or other simple school material on days when blood samples are drawn, and the gift of a T-shirt at the end of the study when everything is done, in appreciation of your contribution to the work.

## 9. What happens if I refuse to take part?

It is very important for you to know that you do not have to take part in the research, the choice is yours. No-one will be upset if you decide not to take part. If you agree to take part and later decide that you do not want to take part anymore, that is also okay.

## 10. What happens if something goes wrong?

The researchers will make every effort to ensure your safety and well-being. MRC/UVRI and LSHTM has a specialist insurance policy in place which would help to pay for treatment if any harm came to you as a result of taking part in the research.

## 11. Who will have access to my information and samples from this research?

All our research records and samples are stored securely in rooms with restricted access and on password protected computers. Only research staff trained to keep the information confidential will have access to the them. Your name will be removed from the records, so no-one will be able to find out information about you from our records.

## 12. Who has reviewed the trial?

This trial has been reviewed by the Uganda National Council for Science and Technology, The Uganda National Drug Authority, the Uganda Virus Research Institute Research and Ethics Committee the ethics committee of the London School of Hygiene and Tropical Medicine in the United Kingdom.

**You can find out more about the study at any time by asking one of the members of the research team. You may also contact Professor Alison Elliott (telephone: 0417 704000) who is in charge of the study, or the Chairperson of the Ethics Committee for the Uganda Virus Research Institute on 0414 321962.**







PVA ID | A | \_\_\_ | \_\_\_ | \_\_\_ | \_\_\_ |

**Witness:**

I have read the participant information sheet and the consent statement above

to:..... (PRINT NAME OF PARTICIPANT) in a language which he/she understands. I believe that he/she gives consent to take part in the study.

|                     |                  |             |
|---------------------|------------------|-------------|
| .....               | .....            | .....       |
| <b>Witness name</b> | <b>Signature</b> | <b>Date</b> |

*Witness required only for those using a thumb print instead of the final signature, or unable to read the information and consent form, or if the person taking consent does not speak the participant's language. The witness must not be a member of the research staff or a study participant. The witness must be present for the whole consent process.*

**Person taking the consent:**

|                        |                  |             |
|------------------------|------------------|-------------|
| .....                  | .....            | .....       |
| <b>Researcher name</b> | <b>Signature</b> | <b>Date</b> |

**Comment:**





## MRC/UVRI and LSHTM Uganda Research Unit



Uganda  
Virus  
Research  
Institute



## Population differences in vaccine responses: the effect of intensive treatment for schistosomiasis on response to vaccines among island adolescents

### Short Title: POPVAC Project A

### Information Sheet for parents/guardians

We are inviting your child to join in some research which is being done by a team from Uganda Virus Research Institute (UVRI), working together with colleagues from the London School of Hygiene and Tropical Medicine, UK. This form will tell you about the research. If you have any questions, please ask the person who is telling you about this research. Then you can decide whether you want your child to take part or not. There is no need for your child to take part unless you really want him/her to do so. If you agree for your child to take part, you will need to sign the consent form to show us that you are happy for him/her to do so. If you decide that you do not want your child to take part, do not sign the consent form.

The people leading this research study are Professor Alison Elliott and Dr Ludoviko Zirimenya.

#### 1. What this research is about, and the reason for doing this research?

Vaccines are a very important tool for preventing infectious diseases. They have saved many lives. Vaccines are usually made from a weakened or killed strain of the bacteria or viruses that cause infectious diseases, or from a part of the bacteria or viruses. Vaccines are designed to help our body's defence system to recognise infectious diseases before we actually meet them, so that we can defeat them more easily. **However, some vaccines seem to work less well in hot countries, near the equator (such as Uganda), than in cooler countries (such as the United Kingdom, the UK).** We want to find out why this is so.

Worm infections are much more common in warm countries (such as Uganda) than in cooler countries (such as the UK). Bilharzia (schistosomiasis) is a worm infection which is very common in Koome islands. Almost everyone in Koome has Bilharzia. Worms can live in our bodies for many years. To do this they have to be able to switch off some of our body's defence systems so that they will not be killed. **We think that this "switching off" of defence systems may also prevent some vaccines from working well.** If this is true then treating worms before giving vaccines might result in better responses to the vaccines.



POPVAC Project A, information and consent for parents/guardians v1.3, 1<sup>st</sup> July 2019 | Page 1 of 9



1  
2  
3 Light infections with Bilharzia may not be noticed but heavy infections can cause serious  
4 damage, especially to the liver. That is why the Ugandan government usually gives treatment  
5 for Bilharzia once a year in Ugandan schools. This usually reduces the number of Bilharzia  
6 worms but does not get rid of them. **We want to find out whether treating Bilharzia much  
7 more frequently (a total of 7 times in a year) can get rid of it completely and whether this will  
8 improve vaccine responses.**  
9  
10

## 11 **2. Why has my child been asked to take part in this study?**

12  
13 Your child has been asked because he/she is attending primary school in Koome islands, in  
14 primary 1 to 6. Bilharzia infection is often heaviest in people of primary school age. Also, the  
15 government of Uganda offers vaccines to your child's age group that will help to protect them  
16 from infectious diseases later on. So it is important to know whether Bilharzia can affect these  
17 vaccines, and whether treating Bilharzia effectively is helpful.  
18  
19

## 20 **3. What is going to happen in this research study?**

### 21 Your child will have a health check-up

22  
23 If you want your child to take part in this study, we will first check your child's health, and take  
24 stool samples, urine samples and some blood from a vein in your child's arm and do some tests.  
25 These will include tests for infections including HIV, malaria and worms, tests for anaemia (the  
26 strength of blood in your child's body), and tests for pregnancy if your child is a girl.  
27  
28

29  
30 If everything is okay then we will enrol your child in the study. If something is not okay then we  
31 will either give your child the treatment that he/she needs, or tell you what to do.  
32

### 33 Your child will be put into one of the two Bilharzia treatment groups

34  
35 When your child is enrolled in the study we will put your child into one of two groups.  
36

- 37 • One group will be treated for Bilharzia using praziquantel (the recommended medicine  
38 for Bilharzia) seven times in the year, and an eighth time after the end of the study.
- 39 • The other group will be treated for Bilharzia using praziquantel once in the year, and a  
40 second time after the end of the study.  
41  
42

43 The choice of groups will be done using a code generated by computer. This works so that your  
44 child is put into one group or the other by luck – this is like a lottery.  
45  
46  
47  
48  
49  
50  
51  
52

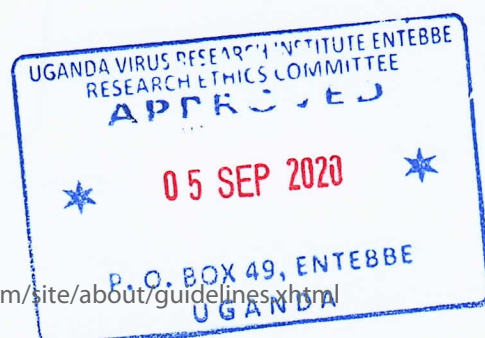



Your child will be immunised with **several vaccines**. These are the vaccines:

- BCG vaccine. This is intended to protect against tuberculosis. Tuberculosis is very common in Uganda. Many people receive the BCG vaccine as a baby. BCG can be given again at school age and may help to protect against tuberculosis later on although the level of protection varies a lot between countries. We do not know how well it works in school children in Uganda.
- Yellow fever vaccine. This protects against Yellow Fever. Yellow fever is a virus carried by mosquitoes. Yellow fever disease affects the liver and causes fever and jaundice (yellow eyes). Outbreaks occur in Uganda and neighbouring countries from time to time – an outbreak is when a group of people falls sick around the same time.
- HPV vaccine. Human Papilloma Virus (HPV) causes warts. As well, some strains of HPV can cause cancer in the genital areas, especially on the cervix (the opening of the womb) in girls. HPV can also cause cancer of the penis in boys, and other cancers. The HPV vaccine reduces the risk of infection with dangerous HPV strains that cause cancer. In this way it reduces the risk of cancers. The Ugandan government recently started offering this vaccine to girls in primary 4. We will give this vaccine to you if you are a girl (in any class) and you have not received it already. We will also give this vaccine to boys because it can protect them against some cancers too.
- Tetanus and diphtheria vaccines. Tetanus and diphtheria are bacterial infections. The tetanus and diphtheria bacteria produce chemicals called toxins which cause diseases. Tetanus bacteria infect deep wounds and produce tetanus toxin which causes very serious muscle spasms. Tetanus can affect young babies if the wound where the umbilical cord is cut becomes infected. Immunising young women can protect their future babies too. Diphtheria causes a very serious throat infection. Tetanus and diphtheria immunisation is given to babies but booster immunisation is recommended by the Uganda government for school children also.
- Typhoid vaccine. Typhoid is a serious form of fever which is spread through contaminated food. Outbreaks occur in Uganda. Immunisation against typhoid can prevent this illness.

These immunisations will be given at three different time points. BCG will be given first. HPV vaccine, oral typhoid vaccine and yellow fever vaccine will be given four weeks later. A second dose of HPV vaccine and first dose of Tetanus/diphtheria vaccine will be given at 28 weeks after the BCG immunisation.

Most of the vaccines will be injected into your child's upper arm (either right or left). This will be a bit painful, as for any injection of medicine that you may have had, and will feel a bit sore over the next week or so. The BCG vaccine is likely to form a small swelling and then an ulcer

POPVAC Project A, information and consent for parents/guardians v1.3, 1<sup>st</sup> July 2019 | Page 3 of 9

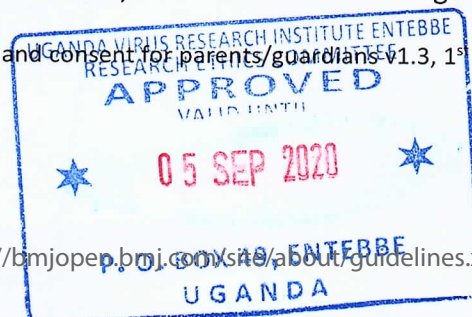



1  
2  
3 which may take quite some time (perhaps two to five months) to heal. The typhoid vaccine is  
4 an oral vaccine: it is in the form of capsules which are swallowed. Your child will be given one  
5 capsule per day for three alternating days.  
6

#### 7 Your child will be asked to give **blood samples**

8  
9 To test your child's response to the vaccines we will ask your child to give blood samples before  
10 and after they are given the vaccines. The amount of blood that we will take at each visit is  
11 completely safe and will vary between 4 and 27 millilitres (1 teaspoon and 5 and a half  
12 teaspoons) at the different visits. In total we will ask your child to give blood samples at 7  
13 different times during the study. The study will last for about two years.  
14  
15

#### 16 Your child will be asked to give **stool and urine samples**

17  
18 At some visits we will ask your child for additional stool and urine samples for testing to check  
19 whether the worm infections have responded to treatment or (for girls) whether your child has  
20 become pregnant.  
21  
22

#### 23 Some of the children will be asked to take part in a special **sugar test** of absorption from the 24 intestines

25  
26 We think that worm infections may make our intestines a little bit leaky, and this might explain  
27 some of their effects. We can test this using a special sugar drink. We will ask about 200  
28 children to do this additional test. If your child is asked to do this, it will be done about 8 weeks  
29 after the first vaccine is given. He/she will be asked not to eat overnight or in the morning of  
30 the test day. Then he/she will be given a special drink that contains sugars early in the  
31 morning. Afterwards he/she will also be asked to drink a litre of water (equal to two Rwenzori  
32 bottles) over the following few hours. All the urine that he/she passes during the next five  
33 hours will be collected. The volume (amount) of urine will be measured and the amount of  
34 sugar in it will be tested, to find out how much of the sugar his/her body has absorbed.  
35  
36  
37  
38

39 **If you do not want your child to take part in the study, to have blood, urine and stool samples**  
40 **taken or to receive the treatment and vaccines, you can say no to your child's taking part in**  
41 **this study.**  
42  
43

#### 44 **4. What will the blood, stool and urine samples be used for?**

45  
46 The samples will be used to test for infections, including HIV, malaria and worms, to test for  
47 anaemia (the strength of your child's blood) and to test for pregnancy (among girls). The blood  
48 samples will also be used to test how your child's body responds to vaccines.  
49  
50  
51  
52

53 POPVAC Project A, information and consent for parents/guardians v1.3, 1<sup>st</sup> July 2019 | Page 4 of 9

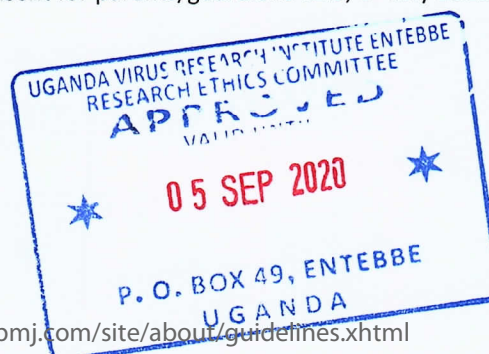

1  
2  
3  
4  
5  
6  
7 **5. How many people will take part in the study, and how long will it last?**

8  
9 The whole study will enrol 480 people, and the study will last for about two years.

10  
11 **6. What are the risks of participating in this trial?**

12  
13 Your child's time

14  
15 Your child will need to take time off classes during each visit by the study team. There will be  
16 12 visits altogether. Each visit will usually take about 30 minutes, but the first visit may take  
17 about two hours to give time for everything to be explained, and for a thorough check-up. The  
18 research team will work with teachers to avoid disturbing classes too much.

19  
20  
21 Blood samples

22  
23 Taking blood samples is not expected to cause any problem for your child, apart from the  
24 discomfort or pain, bruising or bleeding, redness at the place where the needle goes into the  
25 skin, but this will go away in a few days. There is a very small chance that your child may get an  
26 infection or some swelling at this place – this almost never happens. Some people faint when  
27 their blood is taken. The person taking the blood will do all they can to prevent these things  
28 from happening.

29  
30  
31 Sugar test

32  
33 During the sugar test your child will be asked not to eat overnight and during the morning of  
34 the test so he/she may get hungry (although water and a snack will be provided). Most people  
35 have no problems with this test although a few may feel a little sick and stools may become a  
36 bit loose.

37  
38  
39 Pregnancy

40  
41 We do not know how some of these vaccines might affect a developing baby if they were given  
42 to someone who was pregnant. That is why we will do a pregnancy test, if your child is a girl,  
43 even if she knows she could not be pregnant. We have to be quite sure. We will test for  
44 pregnancy at the beginning of the study and on each immunisation day. We will not enrol your  
45 child in the study if she is pregnant at the start. We will not give your child the vaccines if she  
46 falls pregnant later.

47  
48  
49 Bilharzia treatment

50  
51 Treatment of Bilharzia with praziquantel may make your child feel dizzy or sick, give your child  
52 abdominal pain or diarrhoea, or occasionally cause an itchy rash. This is most likely caused by





1  
2  
3 the body's response to the worms as they are being killed by the medicine. The research team  
4 will have medicines available to help your child if he/she has a strong reaction to the treatment.  
5

### 6 Immunisations

7  
8 All the vaccines that we will give have been used to protect very large numbers of people and  
9 are known to be safe. They are not expected to cause any major problems for your child. As  
10 mentioned, the BCG vaccine is expected to cause an ulcer and to heal slowly, leaving a scar. The  
11 injections will cause some pain at the time of injection and your child's arm will feel a bit sore  
12 for a day or two. Some people develop flu-like symptoms including headache and fever for a  
13 day or two. It is fine for your child to take painkillers like paracetamol (Panadol) for these  
14 symptoms. The typhoid vaccine, which your child will swallow as capsules, is not expected to  
15 cause your child any problem at all, although your child may experience some stomach pain,  
16 feeling sick, vomiting and (rarely) rash.  
17  
18

19  
20  
21 Very occasionally any vaccine can cause a serious reaction, such as an allergic reaction. The  
22 research doctors and nurses will be available to help if this happens.  
23

### 24 **7. What are the benefits of taking part in this trial?**

25  
26 The treatment for Bilharzia is likely to be good for your child, whichever group he or she is put  
27 in. The vaccines are likely to help your child by protecting him/her from infectious diseases.  
28

29  
30 Also, you and your child will be helping us to find out why vaccines sometimes don't work so  
31 well in countries like Uganda, and whether vaccines work better if worms are treated first. This  
32 may help other people in the future.  
33

### 34 **8. What is the cost of taking part in the trial?**

35  
36 There is no cost to participate in this trial. We will reimburse you (the parents) for the time you  
37 spend at meetings at school, 20,000/= (twenty thousand shillings) for each visit. Your child will  
38 receive a soft drink and the gift of a pen or other simple school material on days when blood  
39 samples are drawn, and the gift of a T-shirt at the end of the study when everything is done, in  
40 appreciation of his/her contribution to the work.  
41  
42  
43  
44

### 45 **9. What happens if I refuse for my child to take part?**

46  
47 It is very important for you to know that your child does not have to take part in the research,  
48 the choice is yours and your child's. No-one will be upset if your child decides not to take part.  
49 The teachers will not be upset and the research team will not be upset. If you agree for your  
50 child to take part and later decide that you do not want him/her to take part anymore, that is  
51 also okay. Whatever happens, your child will still be able to receive the treatment for Bilharzia  
52

53 POPVAC Project A, information and consent for parents/guardians v1.3, 1<sup>st</sup> July 2019, Page 6 of 9

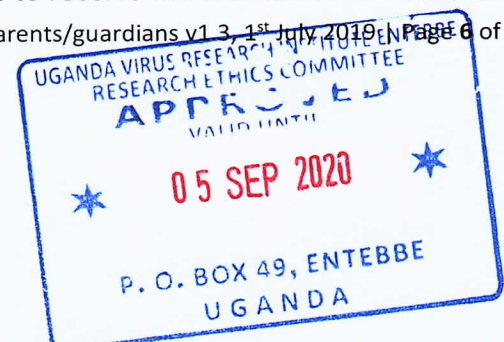



and the immunisations for HPV and tetanus and diphtheria when they are provided by the government, if you wish.

### **10. Who will be able to see the results of tests done on my child's samples?**

The research team will keep your child's results private. Only members of the research team will be able to see results and to know that they belong to your child. Your child's samples will be given a special code so that anyone who is working on them in research laboratories will not know they came from your child.

### **11. What happens if something goes wrong?**

You and your child will be making an important contribution to medical research. The researchers will make every effort to ensure your child's safety and well-being. MRC/UVRI and LSHTM has a specialist insurance policy in place which would help to pay for treatment if any harm came to your child as a result of taking part in the research.

### **12. Who will have access to information from this research?**

All our research records are stored securely in rooms with restricted access and on password protected computers. Only research staff trained to keep the information confidential will have access to the records. Your child's name will be removed from the records, so no-one will be able to find out information about your child from our records. The people who may review your child's records include Research Ethics Committees (Uganda Virus Research Institute Research Ethics Committee and the London School of Hygiene & Tropical Medicine Ethics Committee) the Uganda National Council Science and Technology, Study Monitors, Sponsor and the Uganda National Drug Authority. These organisations are there to ensure that your child's rights are protected and that the research is conducted properly and safely.

### **13. Who has reviewed the trial?**

This trial has been reviewed by the Uganda National Council for Science and Technology, the Uganda Virus Research Institute Research and Ethics Committee, the ethics committee of the London School of Hygiene and Tropical Medicine in the United Kingdom. The Uganda National Drug Authority, which regulates the use of all medicines in Uganda, has granted permission to use the medicines and vaccines needed for this clinical trial.

**You can find out more about the study at any time by asking one of the members of the research team. You may also contact Professor Alison Elliott (telephone: 0417 704000) who is in charge of the study, or the Chairperson of the Ethics Committee for the Uganda Virus Research Institute on 0414 321962.**



POPVAC Project A, information and consent for parents/guardians v1.3, 1<sup>st</sup> July 2019 | Page 7 of 9

## MRC/UVRI and LSHTM Uganda Research Unit

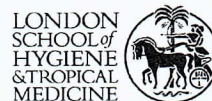

**Population differences in vaccine responses: the effect of intensive treatment for schistosomiasis on response to vaccines among island adolescents**

**Short Title: POPVAC Project A**

**Parent/guardian consent**

A copy of this form will be given to you. Please keep a copy of the form because it contains the information that was discussed with you and you may want to look at it again.

**Participant (child) name:** \_\_\_\_\_ **PVA ID|A|**\_\_\_\_|\_\_\_\_|\_\_\_\_|\_\_\_\_|  
(please write your child's name in capital letters here if you agree)

**AGREEMENT BY PARENT OR GUARDIAN:**

I have read and/or been fully explained the information sheet concerning my child's participation in this study and I understand what will be required if he or she takes part. I understand that my child's participation is voluntary. My questions concerning this study have been answered. I understand that at any time, I may withdraw my child from this study without giving a reason and without affecting his or her entitlement to government health care. I agree for my child to take part in this study.

**Name:** \_\_\_\_\_  
(please write your name in capital letters here if you agree)

**Signature:** \_\_\_\_\_ **Date:** \_\_\_\_\_  
(please sign or write your name here if you agree; or use a thumbprint)

**What if I have any questions?**

If you have any questions about your participation in this study, please feel free to ask any member of the research team at any time. If you prefer, you may speak to the principal investigator for this study (Professor Alison Elliott, telephone 0417 704000).

**What if we want to ask someone independent anything about this research, or have any questions about your rights as a research participant?** You may speak with the Chairman of the Science and Ethics Committee at Uganda Virus Research Institute on 0414 321962.

POPVAC Project A, information and consent for parents/guardians v1.3, 1<sup>st</sup> July 2019 | Page 8 of 9





1  
2  
3  
4  
5  
6  
7  
8  
9  
10  
11  
12  
13  
14  
15  
16  
17  
18  
19  
20  
21  
22  
23  
24  
25  
26  
27  
28  
29  
30  
31  
32  
33  
34  
35  
36  
37  
38  
39  
40  
41  
42  
43  
44  
45  
46  
47  
48  
49  
50  
51  
52  
53  
54  
55  
56  
57  
58  
59  
60

PVA ID | A |    |    |    |    |

**Witness:**

I have read the participant information sheet and the assent statement above

to:..... (PRINT NAME OF PARTICIPANT) in a language which he/she understands. I believe that he/she gives consent for his/her child to take part in the study.

.....  
**Witness name**

.....  
**Signature**

.....  
**Date**

*Witness required only for those using a thumb print instead of the final signature, or unable to read the information and consent form, or if the person taking consent does not speak the participant's language. The witness must not be a member of the research staff or a study participant. The witness must be present for the whole consent process.*

**Person taking the consent:**

.....  
**Researcher name**

.....  
**Signature**

.....  
**Date**

**Comment:**

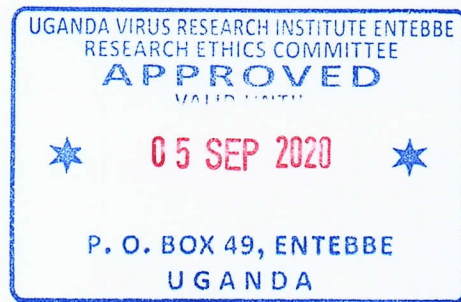

1  
2  
3  
4  
5  
6  
7  
8  
9  
10  
11  
12  
13  
14  
15  
16  
17  
18  
19  
20  
21  
22  
23  
24  
25  
26  
27  
28  
29  
30  
31  
32  
33  
34  
35  
36  
37  
38  
39  
40  
41  
42  
43  
44  
45  
46  
47  
48  
49  
50  
51  
52  
53  
54  
55  
56  
57  
58  
59  
60



# Reporting checklist for protocol of a clinical trial.

Based on the SPIRIT guidelines.

## Instructions to authors

Complete this checklist by entering the page numbers from your manuscript where readers will find each of the items listed below.

Your article may not currently address all the items on the checklist. Please modify your text to include the missing information. If you are certain that an item does not apply, please write "n/a" and provide a short explanation.

Upload your completed checklist as an extra file when you submit to a journal.

In your methods section, say that you used the SPIRIT reporting guidelines, and cite them as:

Chan A-W, Tetzlaff JM, Altman DG, Laupacis A, Gøtzsche PC, Krleža-Jerić K, Hróbjartsson A, Mann H, Dickersin K, Berlin J, Doré C, Parulekar W, Summerskill W, Groves T, Schulz K, Sox H, Rockhold FW, Rennie D, Moher D. SPIRIT 2013 Statement: Defining standard protocol items for clinical trials. *Ann Intern Med.* 2013;158(3):200-207

|                                   | Reporting Item                                                                                                                  | Page Number                                |
|-----------------------------------|---------------------------------------------------------------------------------------------------------------------------------|--------------------------------------------|
| <b>Administrative information</b> |                                                                                                                                 |                                            |
| Title                             | <a href="#">#1</a> Descriptive title identifying the study design, population, interventions, and, if applicable, trial acronym | 1                                          |
| Trial registration                | <a href="#">#2a</a> Trial identifier and registry name. If not yet registered, name of intended registry                        | 2                                          |
| Trial registration: data set      | <a href="#">#2b</a> All items from the World Health Organization Trial Registration Data Set                                    | n/a                                        |
| Protocol version                  | <a href="#">#3</a> Date and version identifier                                                                                  | Information available at<br>ISRCTN60517191 |
| Funding                           | <a href="#">#4</a> Sources and types of financial, material, and other support                                                  | 15                                         |
| Roles and                         | <a href="#">#5a</a> Names, affiliations, and roles of protocol                                                                  | 15                                         |



|                                                            |                     |                                                                                                                                                                                                                                                                                          |                                                              |
|------------------------------------------------------------|---------------------|------------------------------------------------------------------------------------------------------------------------------------------------------------------------------------------------------------------------------------------------------------------------------------------|--------------------------------------------------------------|
| responsibilities:<br>contributorship                       |                     | contributors                                                                                                                                                                                                                                                                             |                                                              |
| Roles and responsibilities:<br>sponsor contact information | <a href="#">#5b</a> | Name and contact information for the trial sponsor                                                                                                                                                                                                                                       | Information available at<br>ISRCTN60517191                   |
| Roles and responsibilities:<br>sponsor and funder          | <a href="#">#5c</a> | Role of study sponsor and funders, if any, in study design; collection, management, analysis, and interpretation of data; writing of the report; and the decision to submit the report for publication, including whether they will have ultimate authority over any of these activities | 16                                                           |
| Roles and responsibilities:<br>committees                  | <a href="#">#5d</a> | Composition, roles, and responsibilities of the coordinating centre, steering committee, endpoint adjudication committee, data management team, and other individuals or groups overseeing the trial, if applicable (see Item 21a for data monitoring committee)                         | Information detailed in<br>supplementary<br>information file |
| <b>Introduction</b>                                        |                     |                                                                                                                                                                                                                                                                                          |                                                              |
| Background and rationale                                   | <a href="#">#6a</a> | Description of research question and justification for undertaking the trial, including summary of relevant studies (published and unpublished) examining benefits and harms for each intervention                                                                                       | 4                                                            |
| Background and rationale: choice of comparators            | <a href="#">#6b</a> | Explanation for choice of comparators                                                                                                                                                                                                                                                    | 8                                                            |
| Objectives                                                 | <a href="#">#7</a>  | Specific objectives or hypotheses                                                                                                                                                                                                                                                        | 6                                                            |
| Trial design                                               | <a href="#">#8</a>  | Description of trial design including type of trial (eg, parallel group, crossover, factorial, single group), allocation ratio, and framework (eg, superiority, equivalence, non-inferiority, exploratory)                                                                               | 7                                                            |

**Methods:  
Participants,  
interventions, and  
outcomes**

|    |                      |                      |                                                                                                                                                                                                                                                                                                                                                                                |                                                           |
|----|----------------------|----------------------|--------------------------------------------------------------------------------------------------------------------------------------------------------------------------------------------------------------------------------------------------------------------------------------------------------------------------------------------------------------------------------|-----------------------------------------------------------|
| 1  | Study setting        | <a href="#">#9</a>   | Description of study settings (eg, community clinic, academic hospital) and list of countries where data will be collected. Reference to where list of study sites can be obtained                                                                                                                                                                                             | 7                                                         |
| 2  |                      |                      |                                                                                                                                                                                                                                                                                                                                                                                |                                                           |
| 3  |                      |                      |                                                                                                                                                                                                                                                                                                                                                                                |                                                           |
| 4  |                      |                      |                                                                                                                                                                                                                                                                                                                                                                                |                                                           |
| 5  |                      |                      |                                                                                                                                                                                                                                                                                                                                                                                |                                                           |
| 6  |                      |                      |                                                                                                                                                                                                                                                                                                                                                                                |                                                           |
| 7  |                      |                      |                                                                                                                                                                                                                                                                                                                                                                                |                                                           |
| 8  | Eligibility criteria | <a href="#">#10</a>  | Inclusion and exclusion criteria for participants. If applicable, eligibility criteria for study centres and individuals who will perform the interventions (eg, surgeons, psychotherapists)                                                                                                                                                                                   | 7                                                         |
| 9  |                      |                      |                                                                                                                                                                                                                                                                                                                                                                                |                                                           |
| 10 |                      |                      |                                                                                                                                                                                                                                                                                                                                                                                |                                                           |
| 11 |                      |                      |                                                                                                                                                                                                                                                                                                                                                                                |                                                           |
| 12 |                      |                      |                                                                                                                                                                                                                                                                                                                                                                                |                                                           |
| 13 |                      |                      |                                                                                                                                                                                                                                                                                                                                                                                |                                                           |
| 14 | Interventions:       | <a href="#">#11a</a> | Interventions for each group with sufficient detail to allow replication, including how and when they will be administered                                                                                                                                                                                                                                                     | 8                                                         |
| 15 | description          |                      |                                                                                                                                                                                                                                                                                                                                                                                |                                                           |
| 16 |                      |                      |                                                                                                                                                                                                                                                                                                                                                                                |                                                           |
| 17 |                      |                      |                                                                                                                                                                                                                                                                                                                                                                                |                                                           |
| 18 |                      |                      |                                                                                                                                                                                                                                                                                                                                                                                |                                                           |
| 19 |                      |                      |                                                                                                                                                                                                                                                                                                                                                                                |                                                           |
| 20 | Interventions:       | <a href="#">#11b</a> | Criteria for discontinuing or modifying allocated interventions for a given trial participant (eg, drug dose change in response to harms, participant request, or improving / worsening disease)                                                                                                                                                                               | Detailed in supplementary information file                |
| 21 | modifications        |                      |                                                                                                                                                                                                                                                                                                                                                                                |                                                           |
| 22 |                      |                      |                                                                                                                                                                                                                                                                                                                                                                                |                                                           |
| 23 |                      |                      |                                                                                                                                                                                                                                                                                                                                                                                |                                                           |
| 24 |                      |                      |                                                                                                                                                                                                                                                                                                                                                                                |                                                           |
| 25 |                      |                      |                                                                                                                                                                                                                                                                                                                                                                                |                                                           |
| 26 |                      |                      |                                                                                                                                                                                                                                                                                                                                                                                |                                                           |
| 27 | Interventions:       | <a href="#">#11c</a> | Strategies to improve adherence to intervention protocols, and any procedures for monitoring adherence (eg, drug tablet return; laboratory tests)                                                                                                                                                                                                                              | Detailed in supplementary information file                |
| 28 | adherence            |                      |                                                                                                                                                                                                                                                                                                                                                                                |                                                           |
| 29 |                      |                      |                                                                                                                                                                                                                                                                                                                                                                                |                                                           |
| 30 |                      |                      |                                                                                                                                                                                                                                                                                                                                                                                |                                                           |
| 31 |                      |                      |                                                                                                                                                                                                                                                                                                                                                                                |                                                           |
| 32 | Interventions:       | <a href="#">#11d</a> | Relevant concomitant care and interventions that are permitted or prohibited during the trial                                                                                                                                                                                                                                                                                  | Detailed in supplementary information file                |
| 33 | concomitant care     |                      |                                                                                                                                                                                                                                                                                                                                                                                |                                                           |
| 34 |                      |                      |                                                                                                                                                                                                                                                                                                                                                                                |                                                           |
| 35 |                      |                      |                                                                                                                                                                                                                                                                                                                                                                                |                                                           |
| 36 |                      |                      |                                                                                                                                                                                                                                                                                                                                                                                |                                                           |
| 37 | Outcomes             | <a href="#">#12</a>  | Primary, secondary, and other outcomes, including the specific measurement variable (eg, systolic blood pressure), analysis metric (eg, change from baseline, final value, time to event), method of aggregation (eg, median, proportion), and time point for each outcome. Explanation of the clinical relevance of chosen efficacy and harm outcomes is strongly recommended | 10                                                        |
| 38 |                      |                      |                                                                                                                                                                                                                                                                                                                                                                                |                                                           |
| 39 |                      |                      |                                                                                                                                                                                                                                                                                                                                                                                |                                                           |
| 40 |                      |                      |                                                                                                                                                                                                                                                                                                                                                                                |                                                           |
| 41 |                      |                      |                                                                                                                                                                                                                                                                                                                                                                                |                                                           |
| 42 |                      |                      |                                                                                                                                                                                                                                                                                                                                                                                |                                                           |
| 43 |                      |                      |                                                                                                                                                                                                                                                                                                                                                                                |                                                           |
| 44 |                      |                      |                                                                                                                                                                                                                                                                                                                                                                                |                                                           |
| 45 |                      |                      |                                                                                                                                                                                                                                                                                                                                                                                |                                                           |
| 46 |                      |                      |                                                                                                                                                                                                                                                                                                                                                                                |                                                           |
| 47 |                      |                      |                                                                                                                                                                                                                                                                                                                                                                                |                                                           |
| 48 |                      |                      |                                                                                                                                                                                                                                                                                                                                                                                |                                                           |
| 49 |                      |                      |                                                                                                                                                                                                                                                                                                                                                                                |                                                           |
| 50 | Participant timeline | <a href="#">#13</a>  | Time schedule of enrolment, interventions (including any run-ins and washouts), assessments, and visits for participants. A schematic diagram is highly recommended (see Figure)                                                                                                                                                                                               | 14                                                        |
| 51 |                      |                      |                                                                                                                                                                                                                                                                                                                                                                                |                                                           |
| 52 |                      |                      |                                                                                                                                                                                                                                                                                                                                                                                |                                                           |
| 53 |                      |                      |                                                                                                                                                                                                                                                                                                                                                                                | Also detailed in supplementary information file, Table S1 |
| 54 |                      |                      |                                                                                                                                                                                                                                                                                                                                                                                |                                                           |
| 55 |                      |                      |                                                                                                                                                                                                                                                                                                                                                                                |                                                           |
| 56 |                      |                      |                                                                                                                                                                                                                                                                                                                                                                                |                                                           |
| 57 |                      |                      |                                                                                                                                                                                                                                                                                                                                                                                |                                                           |
| 58 |                      |                      |                                                                                                                                                                                                                                                                                                                                                                                |                                                           |
| 59 |                      |                      |                                                                                                                                                                                                                                                                                                                                                                                |                                                           |
| 60 |                      |                      |                                                                                                                                                                                                                                                                                                                                                                                |                                                           |

|    |             |                     |                                                    |                  |
|----|-------------|---------------------|----------------------------------------------------|------------------|
| 1  | Sample size | <a href="#">#14</a> | Estimated number of participants needed to achieve | 11               |
| 2  |             |                     | study objectives and how it was determined,        |                  |
| 3  |             |                     | including clinical and statistical assumptions     |                  |
| 4  |             |                     | supporting any sample size calculations            |                  |
| 5  |             |                     |                                                    |                  |
| 6  |             |                     |                                                    |                  |
| 7  |             |                     |                                                    |                  |
| 8  | Recruitment | <a href="#">#15</a> | Strategies for achieving adequate participant      | Detailed in      |
| 9  |             |                     | enrolment to reach target sample size              | supplementary    |
| 10 |             |                     |                                                    | information file |
| 11 |             |                     |                                                    |                  |
| 12 |             |                     |                                                    |                  |

### 13 **Methods:**

#### 14 **Assignment of** 15 **interventions (for** 16 **controlled trials)**

|    |                      |                      |                                                          |                  |
|----|----------------------|----------------------|----------------------------------------------------------|------------------|
| 19 |                      |                      |                                                          |                  |
| 20 | Allocation: sequence | <a href="#">#16a</a> | Method of generating the allocation sequence (eg,        | 8                |
| 21 | generation           |                      | computer-generated random numbers), and list of          |                  |
| 22 |                      |                      | any factors for stratification. To reduce predictability |                  |
| 23 |                      |                      | of a random sequence, details of any planned             |                  |
| 24 |                      |                      | restriction (eg, blocking) should be provided in a       |                  |
| 25 |                      |                      | separate document that is unavailable to those who       |                  |
| 26 |                      |                      | enrol participants or assign interventions               |                  |
| 27 |                      |                      |                                                          |                  |
| 28 |                      |                      |                                                          |                  |
| 29 |                      |                      |                                                          |                  |
| 30 |                      |                      |                                                          |                  |
| 31 | Allocation           | <a href="#">#16b</a> | Mechanism of implementing the allocation sequence        | 9                |
| 32 | concealment          |                      | (eg, central telephone; sequentially numbered,           |                  |
| 33 | mechanism            |                      | opaque, sealed envelopes), describing any steps to       |                  |
| 34 |                      |                      | conceal the sequence until interventions are assigned    |                  |
| 35 |                      |                      |                                                          |                  |
| 36 |                      |                      |                                                          |                  |
| 37 |                      |                      |                                                          |                  |
| 38 | Allocation:          | <a href="#">#16c</a> | Who will generate the allocation sequence, who will      | 8, 9             |
| 39 | implementation       |                      | enrol participants, and who will assign participants to  |                  |
| 40 |                      |                      | interventions                                            |                  |
| 41 |                      |                      |                                                          |                  |
| 42 |                      |                      |                                                          |                  |
| 43 | Blinding (masking)   | <a href="#">#17a</a> | Who will be blinded after assignment to                  | 9                |
| 44 |                      |                      | interventions (eg, trial participants, care providers,   |                  |
| 45 |                      |                      | outcome assessors, data analysts), and how               |                  |
| 46 |                      |                      |                                                          |                  |
| 47 |                      |                      |                                                          |                  |
| 48 |                      |                      |                                                          |                  |
| 49 | Blinding (masking):  | <a href="#">#17b</a> | If blinded, circumstances under which unblinding is      | Detailed in      |
| 50 | emergency            |                      | permissible, and procedure for revealing a               | supplementary    |
| 51 | unblinding           |                      | participant's allocated intervention during the trial    | information file |
| 52 |                      |                      |                                                          |                  |
| 53 |                      |                      |                                                          |                  |

#### 54 **Methods: Data** 55 **collection,** 56 **management, and** 57 **analysis**

|    |                                                  |                      |                                                                                                                                                                                                                                                                                                                                                                                                              |                                                                                                  |
|----|--------------------------------------------------|----------------------|--------------------------------------------------------------------------------------------------------------------------------------------------------------------------------------------------------------------------------------------------------------------------------------------------------------------------------------------------------------------------------------------------------------|--------------------------------------------------------------------------------------------------|
| 1  | Data collection plan                             | <a href="#">#18a</a> | Plans for assessment and collection of outcome, baseline, and other trial data, including any related processes to promote data quality (eg, duplicate measurements, training of assessors) and a description of study instruments (eg, questionnaires, laboratory tests) along with their reliability and validity, if known. Reference to where data collection forms can be found, if not in the protocol | 10.<br>More details in supplementary information file                                            |
| 2  |                                                  |                      |                                                                                                                                                                                                                                                                                                                                                                                                              |                                                                                                  |
| 3  |                                                  |                      |                                                                                                                                                                                                                                                                                                                                                                                                              |                                                                                                  |
| 4  |                                                  |                      |                                                                                                                                                                                                                                                                                                                                                                                                              |                                                                                                  |
| 5  |                                                  |                      |                                                                                                                                                                                                                                                                                                                                                                                                              |                                                                                                  |
| 6  |                                                  |                      |                                                                                                                                                                                                                                                                                                                                                                                                              |                                                                                                  |
| 7  |                                                  |                      |                                                                                                                                                                                                                                                                                                                                                                                                              |                                                                                                  |
| 8  |                                                  |                      |                                                                                                                                                                                                                                                                                                                                                                                                              |                                                                                                  |
| 9  |                                                  |                      |                                                                                                                                                                                                                                                                                                                                                                                                              |                                                                                                  |
| 10 |                                                  |                      |                                                                                                                                                                                                                                                                                                                                                                                                              |                                                                                                  |
| 11 |                                                  |                      |                                                                                                                                                                                                                                                                                                                                                                                                              |                                                                                                  |
| 12 |                                                  |                      |                                                                                                                                                                                                                                                                                                                                                                                                              |                                                                                                  |
| 13 |                                                  |                      |                                                                                                                                                                                                                                                                                                                                                                                                              |                                                                                                  |
| 14 | Data collection plan: retention                  | <a href="#">#18b</a> | Plans to promote participant retention and complete follow-up, including list of any outcome data to be collected for participants who discontinue or deviate from intervention protocols                                                                                                                                                                                                                    | Detailed in supplementary information file                                                       |
| 15 |                                                  |                      |                                                                                                                                                                                                                                                                                                                                                                                                              |                                                                                                  |
| 16 |                                                  |                      |                                                                                                                                                                                                                                                                                                                                                                                                              |                                                                                                  |
| 17 |                                                  |                      |                                                                                                                                                                                                                                                                                                                                                                                                              |                                                                                                  |
| 18 |                                                  |                      |                                                                                                                                                                                                                                                                                                                                                                                                              |                                                                                                  |
| 19 |                                                  |                      |                                                                                                                                                                                                                                                                                                                                                                                                              |                                                                                                  |
| 20 |                                                  |                      |                                                                                                                                                                                                                                                                                                                                                                                                              |                                                                                                  |
| 21 | Data management                                  | <a href="#">#19</a>  | Plans for data entry, coding, security, and storage, including any related processes to promote data quality (eg, double data entry; range checks for data values). Reference to where details of data management procedures can be found, if not in the protocol                                                                                                                                            | 13.<br>More information in the statistical analysis plan found at <a href="#">ISRCTN60517191</a> |
| 22 |                                                  |                      |                                                                                                                                                                                                                                                                                                                                                                                                              |                                                                                                  |
| 23 |                                                  |                      |                                                                                                                                                                                                                                                                                                                                                                                                              |                                                                                                  |
| 24 |                                                  |                      |                                                                                                                                                                                                                                                                                                                                                                                                              |                                                                                                  |
| 25 |                                                  |                      |                                                                                                                                                                                                                                                                                                                                                                                                              |                                                                                                  |
| 26 |                                                  |                      |                                                                                                                                                                                                                                                                                                                                                                                                              |                                                                                                  |
| 27 |                                                  |                      |                                                                                                                                                                                                                                                                                                                                                                                                              |                                                                                                  |
| 28 |                                                  |                      |                                                                                                                                                                                                                                                                                                                                                                                                              |                                                                                                  |
| 29 |                                                  |                      |                                                                                                                                                                                                                                                                                                                                                                                                              |                                                                                                  |
| 30 |                                                  |                      |                                                                                                                                                                                                                                                                                                                                                                                                              |                                                                                                  |
| 31 | Statistics: outcomes                             | <a href="#">#20a</a> | Statistical methods for analysing primary and secondary outcomes. Reference to where other details of the statistical analysis plan can be found, if not in the protocol                                                                                                                                                                                                                                     | 13.<br>More information in the statistical analysis plan found at <a href="#">ISRCTN60517191</a> |
| 32 |                                                  |                      |                                                                                                                                                                                                                                                                                                                                                                                                              |                                                                                                  |
| 33 |                                                  |                      |                                                                                                                                                                                                                                                                                                                                                                                                              |                                                                                                  |
| 34 |                                                  |                      |                                                                                                                                                                                                                                                                                                                                                                                                              |                                                                                                  |
| 35 |                                                  |                      |                                                                                                                                                                                                                                                                                                                                                                                                              |                                                                                                  |
| 36 |                                                  |                      |                                                                                                                                                                                                                                                                                                                                                                                                              |                                                                                                  |
| 37 |                                                  |                      |                                                                                                                                                                                                                                                                                                                                                                                                              |                                                                                                  |
| 38 |                                                  |                      |                                                                                                                                                                                                                                                                                                                                                                                                              |                                                                                                  |
| 39 |                                                  |                      |                                                                                                                                                                                                                                                                                                                                                                                                              |                                                                                                  |
| 40 | Statistics: additional analyses                  | <a href="#">#20b</a> | Methods for any additional analyses (eg, subgroup and adjusted analyses)                                                                                                                                                                                                                                                                                                                                     | 11.<br>More information in the statistical analysis plan found at <a href="#">ISRCTN60517191</a> |
| 41 |                                                  |                      |                                                                                                                                                                                                                                                                                                                                                                                                              |                                                                                                  |
| 42 |                                                  |                      |                                                                                                                                                                                                                                                                                                                                                                                                              |                                                                                                  |
| 43 |                                                  |                      |                                                                                                                                                                                                                                                                                                                                                                                                              |                                                                                                  |
| 44 |                                                  |                      |                                                                                                                                                                                                                                                                                                                                                                                                              |                                                                                                  |
| 45 |                                                  |                      |                                                                                                                                                                                                                                                                                                                                                                                                              |                                                                                                  |
| 46 |                                                  |                      |                                                                                                                                                                                                                                                                                                                                                                                                              |                                                                                                  |
| 47 |                                                  |                      |                                                                                                                                                                                                                                                                                                                                                                                                              |                                                                                                  |
| 48 |                                                  |                      |                                                                                                                                                                                                                                                                                                                                                                                                              |                                                                                                  |
| 49 | Statistics: analysis population and missing data | <a href="#">#20c</a> | Definition of analysis population relating to protocol non-adherence (eg, as randomised analysis), and any statistical methods to handle missing data (eg, multiple imputation)                                                                                                                                                                                                                              | Information in the statistical analysis plan found at <a href="#">ISRCTN60517191</a>             |
| 50 |                                                  |                      |                                                                                                                                                                                                                                                                                                                                                                                                              |                                                                                                  |
| 51 |                                                  |                      |                                                                                                                                                                                                                                                                                                                                                                                                              |                                                                                                  |
| 52 |                                                  |                      |                                                                                                                                                                                                                                                                                                                                                                                                              |                                                                                                  |
| 53 |                                                  |                      |                                                                                                                                                                                                                                                                                                                                                                                                              |                                                                                                  |
| 54 |                                                  |                      |                                                                                                                                                                                                                                                                                                                                                                                                              |                                                                                                  |

## Methods: Monitoring

|    |                      |                      |                                                          |                  |
|----|----------------------|----------------------|----------------------------------------------------------|------------------|
| 1  | Data monitoring:     | <a href="#">#21a</a> | Composition of data monitoring committee (DMC);          | Detailed in      |
| 2  | formal committee     |                      | summary of its role and reporting structure;             | supplementary    |
| 3  |                      |                      | statement of whether it is independent from the          | information file |
| 4  |                      |                      | sponsor and competing interests; and reference to        |                  |
| 5  |                      |                      | where further details about its charter can be found,    |                  |
| 6  |                      |                      | if not in the protocol. Alternatively, an explanation of |                  |
| 7  |                      |                      | why a DMC is not needed                                  |                  |
| 8  |                      |                      |                                                          |                  |
| 9  |                      |                      |                                                          |                  |
| 10 |                      |                      |                                                          |                  |
| 11 |                      |                      |                                                          |                  |
| 12 | Data monitoring:     | <a href="#">#21b</a> | Description of any interim analyses and stopping         | Detailed in      |
| 13 | interim analysis     |                      | guidelines, including who will have access to these      | supplementary    |
| 14 |                      |                      | interim results and make the final decision to           | information file |
| 15 |                      |                      | terminate the trial                                      |                  |
| 16 |                      |                      |                                                          |                  |
| 17 |                      |                      |                                                          |                  |
| 18 |                      |                      |                                                          |                  |
| 19 | Harms                | <a href="#">#22</a>  | Plans for collecting, assessing, reporting, and          | Detailed in      |
| 20 |                      |                      | managing solicited and spontaneously reported            | supplementary    |
| 21 |                      |                      | adverse events and other unintended effects of trial     | information file |
| 22 |                      |                      | interventions or trial conduct                           |                  |
| 23 |                      |                      |                                                          |                  |
| 24 |                      |                      |                                                          |                  |
| 25 |                      |                      |                                                          |                  |
| 26 | Auditing             | <a href="#">#23</a>  | Frequency and procedures for auditing trial conduct,     | Detailed in      |
| 27 |                      |                      | if any, and whether the process will be independent      | supplementary    |
| 28 |                      |                      | from investigators and the sponsor                       | information file |
| 29 |                      |                      |                                                          |                  |
| 30 |                      |                      |                                                          |                  |
| 31 | <b>Ethics and</b>    |                      |                                                          |                  |
| 32 | <b>dissemination</b> |                      |                                                          |                  |
| 33 |                      |                      |                                                          |                  |
| 34 |                      |                      |                                                          |                  |
| 35 | Research ethics      | <a href="#">#24</a>  | Plans for seeking research ethics committee /            | 12               |
| 36 | approval             |                      | institutional review board (REC / IRB) approval          |                  |
| 37 |                      |                      |                                                          |                  |
| 38 |                      |                      |                                                          |                  |
| 39 | Protocol             | <a href="#">#25</a>  | Plans for communicating important protocol               | 11               |
| 40 | amendments           |                      | modifications (eg, changes to eligibility criteria,      |                  |
| 41 |                      |                      | outcomes, analyses) to relevant parties (eg,             |                  |
| 42 |                      |                      | investigators, REC / IRBs, trial participants, trial     |                  |
| 43 |                      |                      | registries, journals, regulators)                        |                  |
| 44 |                      |                      |                                                          |                  |
| 45 |                      |                      |                                                          |                  |
| 46 |                      |                      |                                                          |                  |
| 47 | Consent or assent    | <a href="#">#26a</a> | Who will obtain informed consent or assent from          | 12.              |
| 48 |                      |                      | potential trial participants or authorised surrogates,   |                  |
| 49 |                      |                      | and how (see Item 32)                                    |                  |
| 50 |                      |                      |                                                          | Also detailed in |
| 51 |                      |                      |                                                          | supplementary    |
| 52 |                      |                      |                                                          | information file |
| 53 |                      |                      |                                                          |                  |
| 54 |                      |                      |                                                          |                  |
| 55 | Consent or assent:   | <a href="#">#26b</a> | Additional consent provisions for collection and use     | Detailed in      |
| 56 | ancillary studies    |                      | of participant data and biological specimens in          | supplementary    |
| 57 |                      |                      | ancillary studies, if applicable                         | information file |
| 58 |                      |                      |                                                          |                  |
| 59 |                      |                      |                                                          |                  |
| 60 |                      |                      |                                                          |                  |



|    |                                             |                      |                                                                                                                                                                                                                                                                                     |                                            |
|----|---------------------------------------------|----------------------|-------------------------------------------------------------------------------------------------------------------------------------------------------------------------------------------------------------------------------------------------------------------------------------|--------------------------------------------|
| 1  | Confidentiality                             | <a href="#">#27</a>  | How personal information about potential and enrolled participants will be collected, shared, and maintained in order to protect confidentiality before, during, and after the trial                                                                                                | Detailed in supplementary information file |
| 2  |                                             |                      |                                                                                                                                                                                                                                                                                     |                                            |
| 3  |                                             |                      |                                                                                                                                                                                                                                                                                     |                                            |
| 4  |                                             |                      |                                                                                                                                                                                                                                                                                     |                                            |
| 5  |                                             |                      |                                                                                                                                                                                                                                                                                     |                                            |
| 6  |                                             |                      |                                                                                                                                                                                                                                                                                     |                                            |
| 7  |                                             |                      |                                                                                                                                                                                                                                                                                     |                                            |
| 8  | Declaration of interests                    | <a href="#">#28</a>  | Financial and other competing interests for principal investigators for the overall trial and each study site                                                                                                                                                                       | 15                                         |
| 9  |                                             |                      |                                                                                                                                                                                                                                                                                     |                                            |
| 10 |                                             |                      |                                                                                                                                                                                                                                                                                     |                                            |
| 11 | Data access                                 | <a href="#">#29</a>  | Statement of who will have access to the final trial dataset, and disclosure of contractual agreements that limit such access for investigators                                                                                                                                     | n/a                                        |
| 12 |                                             |                      |                                                                                                                                                                                                                                                                                     |                                            |
| 13 |                                             |                      |                                                                                                                                                                                                                                                                                     |                                            |
| 14 |                                             |                      |                                                                                                                                                                                                                                                                                     |                                            |
| 15 |                                             |                      |                                                                                                                                                                                                                                                                                     |                                            |
| 16 |                                             |                      |                                                                                                                                                                                                                                                                                     |                                            |
| 17 | Ancillary and post trial care               | <a href="#">#30</a>  | Provisions, if any, for ancillary and post-trial care, and for compensation to those who suffer harm from trial participation                                                                                                                                                       | Detailed in supplementary information file |
| 18 |                                             |                      |                                                                                                                                                                                                                                                                                     |                                            |
| 19 |                                             |                      |                                                                                                                                                                                                                                                                                     |                                            |
| 20 |                                             |                      |                                                                                                                                                                                                                                                                                     |                                            |
| 21 |                                             |                      |                                                                                                                                                                                                                                                                                     |                                            |
| 22 | Dissemination policy: trial results         | <a href="#">#31a</a> | Plans for investigators and sponsor to communicate trial results to participants, healthcare professionals, the public, and other relevant groups (eg, via publication, reporting in results databases, or other data sharing arrangements), including any publication restrictions | 2, 13                                      |
| 23 |                                             |                      |                                                                                                                                                                                                                                                                                     |                                            |
| 24 |                                             |                      |                                                                                                                                                                                                                                                                                     |                                            |
| 25 |                                             |                      |                                                                                                                                                                                                                                                                                     |                                            |
| 26 |                                             |                      |                                                                                                                                                                                                                                                                                     |                                            |
| 27 |                                             |                      |                                                                                                                                                                                                                                                                                     |                                            |
| 28 |                                             |                      |                                                                                                                                                                                                                                                                                     |                                            |
| 29 |                                             |                      |                                                                                                                                                                                                                                                                                     |                                            |
| 30 |                                             |                      |                                                                                                                                                                                                                                                                                     |                                            |
| 31 |                                             |                      |                                                                                                                                                                                                                                                                                     |                                            |
| 32 | Dissemination policy: authorship            | <a href="#">#31b</a> | Authorship eligibility guidelines and any intended use of professional writers                                                                                                                                                                                                      | n/a                                        |
| 33 |                                             |                      |                                                                                                                                                                                                                                                                                     |                                            |
| 34 |                                             |                      |                                                                                                                                                                                                                                                                                     |                                            |
| 35 |                                             |                      |                                                                                                                                                                                                                                                                                     |                                            |
| 36 | Dissemination policy: reproducible research | <a href="#">#31c</a> | Plans, if any, for granting public access to the full protocol, participant-level dataset, and statistical code                                                                                                                                                                     | 13                                         |
| 37 |                                             |                      |                                                                                                                                                                                                                                                                                     |                                            |
| 38 |                                             |                      |                                                                                                                                                                                                                                                                                     |                                            |
| 39 |                                             |                      |                                                                                                                                                                                                                                                                                     |                                            |
| 40 |                                             |                      |                                                                                                                                                                                                                                                                                     |                                            |
| 41 | <b>Appendices</b>                           |                      |                                                                                                                                                                                                                                                                                     |                                            |
| 42 |                                             |                      |                                                                                                                                                                                                                                                                                     |                                            |
| 43 | Informed consent materials                  | <a href="#">#32</a>  | Model consent form and other related documentation given to participants and authorised surrogates                                                                                                                                                                                  | Supplementary files provided               |
| 44 |                                             |                      |                                                                                                                                                                                                                                                                                     |                                            |
| 45 |                                             |                      |                                                                                                                                                                                                                                                                                     |                                            |
| 46 |                                             |                      |                                                                                                                                                                                                                                                                                     |                                            |
| 47 | Biological specimens                        | <a href="#">#33</a>  | Plans for collection, laboratory evaluation, and storage of biological specimens for genetic or molecular analysis in the current trial and for future use in ancillary studies, if applicable                                                                                      | n/a                                        |
| 48 |                                             |                      |                                                                                                                                                                                                                                                                                     |                                            |
| 49 |                                             |                      |                                                                                                                                                                                                                                                                                     |                                            |
| 50 |                                             |                      |                                                                                                                                                                                                                                                                                     |                                            |
| 51 |                                             |                      |                                                                                                                                                                                                                                                                                     |                                            |
| 52 |                                             |                      |                                                                                                                                                                                                                                                                                     |                                            |
| 53 |                                             |                      |                                                                                                                                                                                                                                                                                     |                                            |

None The SPIRIT checklist is distributed under the terms of the Creative Commons Attribution License CC-BY-ND 3.0. This checklist can be completed online using <https://www.goodreports.org/>, a tool made by the [EQUATOR Network](#) in collaboration with [Penelope.ai](#)
