# Supplementary material for: Effect of intensive treatment for schistosomiasis on immune responses to vaccines among rural Ugandan island adolescents: randomised controlled trial protocol A for the ‘POPulation differences in VACcine responses’ (POPVAC) programme
Source: PubMed Central journal article supplement (PMC7888376; doi:10.1136/bmjopen-2020-040426), 2021-02-16
Supplement: bmjopen-2020-040426supp001.pdf [file bmjopen-2020-040426supp001.pdf]

1 [SUPPLEMENTARY INFORMATION](#)

2

3 **The effect of intensive treatment for schistosomiasis on immune responses to vaccines among**  
4 **rural Ugandan island adolescents: randomised controlled trial protocol A for the ‘POPulation**  
5 **differences in VACCine responses’ (POPVAC) programme**

6 Gyaviira Nkurunungi<sup>1,¶,\*</sup>, Ludoviko Zirimenya<sup>1,¶</sup>, Jacent Nassuuna<sup>1,¶</sup>, Agnes Natukunda<sup>1,¶</sup>, Prossy N  
7 Kabuubi<sup>1</sup>, Emmanuel Niwagaba<sup>1</sup>, Gloria Oduru<sup>1</sup>, Grace Kabami<sup>1</sup>, Rebecca Amongin<sup>1</sup>, Alex Mutebe<sup>1</sup>,  
8 Milly Namutebi<sup>1</sup>, Christopher Zziwa<sup>1</sup>, Susan Amongi<sup>1</sup>, Caroline Ninsiima<sup>1</sup>, Caroline Onen<sup>1</sup>, Florence  
9 Akello<sup>1</sup>, Moses Sewankambo<sup>1</sup>, Samuel Kiwanuka<sup>1</sup>, Robert Kizindo<sup>1</sup>, James Kaweesa<sup>2</sup>, Stephen Cose<sup>1,3</sup>,  
10 Emily L Webb<sup>4</sup>, Alison M Elliott<sup>1,3</sup> **for the POPVAC trial team**

11

12 <sup>1</sup>Immunomodulation and Vaccines Programme, Medical Research Council/Uganda Virus Research  
13 Institute and London School of Hygiene and Tropical Medicine (MRC/UVRI and LSHTM) Uganda  
14 Research Unit, Entebbe, Uganda

15 <sup>2</sup>Vector Control Division, Ministry of Health, Kampala, Uganda

16 <sup>3</sup>Department of Clinical Research, London School of Hygiene and Tropical Medicine, London, United  
17 Kingdom

18 <sup>4</sup>MRC Tropical Epidemiology Group, Department of Infectious Disease Epidemiology, London School  
19 of Hygiene and Tropical Medicine, London, United Kingdom

20 <sup>¶</sup>These authors contributed equally

21 **\*Correspondence:** Gyaviira Nkurunungi; [Gyaviira.Nkurunungi@mrcuganda.org](mailto:Gyaviira.Nkurunungi@mrcuganda.org)

Table S1. Schedule of visits and procedures

| VISIT NUMBER                                                                                                                                  | 1               | 2 & 3                     | 4             | 5 <sup>9</sup> | 5.2             | 6                                    | 7       | 8             | 9                                       | 10      | 11                |
|-----------------------------------------------------------------------------------------------------------------------------------------------|-----------------|---------------------------|---------------|----------------|-----------------|--------------------------------------|---------|---------------|-----------------------------------------|---------|-------------------|
| WEEKS FROM 1 <sup>ST</sup> IMMUNISATION                                                                                                       | -8 <sup>1</sup> | -6 <sup>10</sup> , -4, -2 | 0             | 4              | 4 weeks +4 days | 8                                    | 20      | 28            | 32                                      | 44      | 52                |
|                                                                                                                                               | Screening       | Treatment (Rx) only       | Immunisations | Immunisations  |                 | Primary Endpoint (PE), Immunisations | Rx only | Immunisations | PE/Secondary Endpoint (SE) <sup>2</sup> | Rx only | SE, Immunisations |
| <b>RANDOMISED INTENSIVE VS STANDARD PRAZIQUANTEL INTERVENTION</b>                                                                             |                 |                           |               |                |                 |                                      |         |               |                                         |         |                   |
| PZQ intensive arm (x)                                                                                                                         |                 | x                         |               |                |                 | x <sup>3</sup>                       | x       |               | x <sup>3</sup>                          | x       | x <sup>3</sup>    |
| PZQ standard arm                                                                                                                              |                 |                           |               |                |                 | x <sup>3</sup>                       |         |               |                                         |         | x <sup>3</sup>    |
| Albendazole                                                                                                                                   |                 |                           |               |                |                 | x <sup>3</sup>                       |         |               | x <sup>3</sup>                          |         | x <sup>3</sup>    |
| <b>VACCINES</b>                                                                                                                               |                 |                           |               |                |                 |                                      |         |               |                                         |         |                   |
| BCG                                                                                                                                           |                 |                           | x             |                |                 |                                      |         |               |                                         |         |                   |
| YF-17D                                                                                                                                        |                 |                           |               | x              |                 |                                      |         |               |                                         |         |                   |
| Ty21a                                                                                                                                         |                 |                           |               | x              |                 |                                      |         |               |                                         |         |                   |
| HPV                                                                                                                                           |                 |                           |               | x              |                 | [x] <sup>4</sup>                     |         | x             |                                         |         |                   |
| Td                                                                                                                                            |                 |                           |               |                |                 |                                      |         | x             |                                         |         | [x] <sup>5</sup>  |
| <b>INVESTIGATIONS/PROCEDURES</b>                                                                                                              |                 |                           |               |                |                 |                                      |         |               |                                         |         |                   |
| Inclusion/exclusion criteria                                                                                                                  | x               |                           |               |                |                 |                                      |         |               |                                         |         |                   |
| Informed consent                                                                                                                              | x               |                           |               |                |                 |                                      |         |               |                                         |         |                   |
| Questionnaire                                                                                                                                 | x               |                           | x             | x              | x               | x                                    |         | x             | x                                       |         | x                 |
| Examination                                                                                                                                   | x               |                           | (x)           | (x)            | (x)             | (x)                                  |         | (x)           | (x)                                     |         | (x)               |
| Urine β-HCG test (female only) 1mL                                                                                                            | x               |                           | x             | x              |                 |                                      |         | x             |                                         |         |                   |
| Urine YF viral load                                                                                                                           |                 |                           |               |                | x               |                                      |         |               |                                         |         |                   |
| Stool for PCR and storage                                                                                                                     | x               |                           |               |                |                 |                                      |         | x             |                                         |         | x                 |
| Stool for coproantibody and storage                                                                                                           | x               |                           |               |                |                 | x                                    |         |               |                                         |         |                   |
| <b>BLOOD SAMPLES</b>                                                                                                                          |                 |                           |               |                |                 |                                      |         |               |                                         |         |                   |
| Malaria PCR (1ml)                                                                                                                             |                 |                           | x             | x              |                 |                                      |         | x             |                                         |         | x                 |
| Serology for HIV, prior malaria and <i>S. mansoni</i> (0.5ml)                                                                                 | x               |                           |               |                |                 |                                      |         |               |                                         |         |                   |
| Mansonella perstans (1ml)                                                                                                                     | x               |                           |               |                |                 |                                      |         |               |                                         |         |                   |
| Serum/plasma CAA (1ml)                                                                                                                        | x               |                           | x             | x              |                 | x                                    |         | x             | x                                       |         | x                 |
| Hb <sup>8</sup> / Full blood count (0.5ml)                                                                                                    | x               |                           | x             | x              |                 |                                      |         | x             |                                         |         |                   |
| Assessments of pre-immunisation responses, and/or vaccine response outcomes and/or exploratory immunology; storage <sup>7</sup> (10 – 20 mls) |                 |                           | x             | x              |                 | x                                    |         | x             | x                                       |         | x                 |
| Blood for gene expression (2mls)                                                                                                              |                 |                           | x             | x              |                 |                                      |         | x             |                                         |         |                   |
| Blood vol (mL)                                                                                                                                | 4               |                           | 27            | 17             |                 | 10-20                                |         | 27            | 10                                      |         | 14                |
| Cumulative blood vol (mL) <sup>7</sup>                                                                                                        | 4               |                           | 31            | 48             |                 | 68                                   |         | 95            | 105                                     |         | 119               |

**PE:** primary endpoint; **SE:** secondary endpoint; **Rx only:** treatment only

Immunisation days highlighted in green, primary end point days in red, days for treatment only in grey

(x) performed if clinically indicated

1. Screening and enrolment into Project A will take place about 8 weeks before immunisation 0 to allow initiation of the praziquantel intervention.
2. Week 32 is primary endpoint for responses to Td given at 28 weeks; secondary endpoint for HPV booster
3. Treatments given after sampling when schedules coincide
4. Week 8 HPV dose will be given for previously-unvaccinated girls aged  $\geq 14$  years
5. Week 52 Td booster dose will be provided as a service
6. Exploratory immunology blood volume will be guided by guidelines from Harvard Mass General, where a maximum of 3ml/kg body weight is taken at any one time point and not more than 3ml/kg is taken over any 8-week period (ref [http://www.drgreene.com/21\\_1616.html](http://www.drgreene.com/21_1616.html).) These guidelines have been followed in a previous study vaccinating adolescents with investigational tuberculosis vaccine MVA85A (in Uganda).<sup>1</sup> The total blood volume planned is 68 ml over the initial intensive sampling period of 8 weeks. Revision of sample volumes based on weight will only be required for participants who weigh less than 22 kg; the average weight of children aged 9 years is expected to be 28kg (with 21kg the 3rd centile) with greater weights for older children.<sup>2</sup>
7. At baseline, it will only be Hb estimation by Haemocue
8. Oral typhoid vaccine doses will be administered on three alternate days namely visit 5, 5.1 and 5.2.
9. The first PZQ treatment at week -6 will be administered at the end of the screening visit

22

### 23 **Further information on recruitment criteria**

- 24 • Participants who are excluded from the trial because they have been discovered (during  
25 screening procedures) to be suffering from a previously undiagnosed condition thought to  
26 require further medical attention will be referred appropriately for further investigation and  
27 treatment.
- 28 • Participants discovered to have severe anaemia will be excluded from the trial and treated  
29 for anaemia
- 30 • Participants discovered to be HIV-positive will be counselled and offered a CD4 T-cell count  
31 and referred to a provider of antiretroviral treatment (“Test and Treat” – i.e. initiation of  
32 treatment regardless of CD4 count is recommended for these high-risk communities).
- 33 • Participants discovered to be pregnant will be counselled and referred to an antenatal clinic  
34 of their choice.

35 This trial proposes to recruit all participants within a short time-frame. It will not, therefore, be  
36 possible to reconsider enrolment of potential participants with temporary exclusion criteria after  
37 treatment and resolution of the condition.

### 38 **Further rationale for the selection of vaccines**

#### 39 *Bacillus Calmette–Guérin (BCG)*

40 BCG is a live, replicating parenteral vaccine, and the only licensed vaccine against TB. The BCG  
41 vaccine for these studies will be obtained from the Serum Institute of India either directly, or  
42 through a supplier in Uganda. The Serum Institute of India provides much of the BCG vaccine used  
43 in Uganda.

44 Worldwide, TB is among the top 10 causes of death; Uganda has an estimated incidence of  
45 202/100,000 people.<sup>3</sup> Infectious, sputum positive, pulmonary TB classically emerges in adolescence,  
46 driving the on-going epidemic.<sup>4</sup> Thus adolescent booster immunisation is a key TB control strategy.<sup>5</sup>  
47 However, BCG vaccine response and efficacy are often impaired in tropical and rural settings<sup>6-8</sup> and  
48 new TB vaccines are similarly affected.<sup>9</sup> In the past, the WHO has been hesitant to recommend BCG  
49 re-vaccination. However, in 2017 WHO’s Strategic Advisory Group of Experts (SAGE) recommended:  
50 “Further research is warranted to explore whether certain sub-groups of age, geographic or *M.*  
51 *tuberculosis* exposure categories would benefit from re-vaccination.”<sup>10</sup> Recent results suggest that,  
52 despite the variability of BCG efficacy between populations, BCG vaccination in adolescence offers  
53 benefit in some tropical settings, especially for individuals who are not yet infected with  
54 *Mycobacterium tuberculosis*, and may also be cost-effective.<sup>7,11</sup> Also, BCG vaccine is currently being  
55 used among adolescents in South Africa as a comparator in a trial of a novel TB vaccine (trial

56 registration NCT02075203). BCG efficacy in Ugandan adolescents, and differences in BCG vaccine  
57 responses between urban and rural Ugandan populations, have not been tested. Information  
58 obtained from this study is expected to further inform the use of BCG in adolescents, and also to  
59 inform the development of new vaccines for tuberculosis.

#### 60 *Yellow fever vaccine*

61 Yellow fever vaccine YF-17D is a live replicating parenteral vaccine. The vaccine (Stamaril; Sanofi  
62 Pasteur) is available for purchase in Uganda. Yellow Fever (YF) causes outbreaks in Uganda and the  
63 wider region<sup>12</sup> and YF-17D is a candidate for Uganda's expanded programme on immunisation (EPI).  
64 Lower vaccine replication, lower neutralising antibody induction, and greater waning, are described  
65 in Uganda compared to Switzerland.<sup>13</sup> YF-17D is a potential vector for novel vaccine constructs,<sup>14</sup>  
66 adding relevance to vaccine development.

#### 67 *Typhoid vaccine Ty21a*

68 Typhoid vaccine Ty21a is a live replicating oral vaccine and also a potential vector for new vaccine  
69 constructs.<sup>15</sup> The Ty21a vaccine will be purchased from PaxVax, Redwood City, California.  
70 Substantial, multi-year typhoid outbreaks occur in Uganda and immunisation campaigns have been  
71 advocated as cost effective.<sup>16</sup> Schistosomiasis has been associated with prolonged *S. typhi* infection<sup>17</sup>  
72 and impaired antibody responses to killed typhoid vaccines.<sup>18</sup>

73 Ty21a was developed in the 1970s. Although not routinely used in Uganda, it has been (and is  
74 currently) registered in many countries. It was first registered in the United States and United  
75 Kingdom in the 1980s, and is recommended by the WHO for both endemic and epidemic settings.<sup>19</sup>  
76 It has comparable efficacy to the parenteral Vi polysaccharide typhoid vaccine, good durability and  
77 minimal adverse effects.<sup>19</sup> It is proposed for use in this study to model effects of study exposures  
78 and intervention on the response to a live oral vaccine.

79 The Ty21a vaccine is given as a three-dose regimen on alternate days.

#### 80 *Human Papilloma Virus (HPV) vaccine*

81 The Human Papilloma Virus (HPV) vaccine is a protein virus-like particle. The quadrivalent HPV  
82 Vaccine Gardasil (Merck) is available for purchase in Uganda and is the vaccine used by the national  
83 EPI programme. Studies after three vaccine doses have found somewhat enhanced responses in the  
84 presence of malaria, but no effect of helminths.<sup>20</sup> No study has previously investigated parasite  
85 effects on the priming response, but recent results for tetanus suggest that priming may be more  
86 susceptible than boosting to adverse effects.<sup>21</sup> This will be important if forthcoming trials support  
87 single-dose HPV immunisation (NCT02834637). HPV immunisation is being rolled out among girls to

88 prevent cervical neoplasia, the most common cancer among Ugandan women and we will  
89 coordinate provision with the national HPV immunisation programme.<sup>22</sup> HPV immunisation is also  
90 beneficial for boys since HPV infection is associated with anogenital warts, anal cancer and  
91 oropharyngeal cancers in both males and females, and with penile cancer in men,<sup>23</sup> and we will  
92 include boys in these studies.

### 93 *Tetanus and diphtheria vaccines*

94 Tetanus and diphtheria (Td) vaccines comprise inert toxoids. Schistosomiasis is associated with a Th2  
95 biased response to tetanus toxoid<sup>24</sup> and with suppressed antibody responses among those with low  
96 pre-immunisation antibody levels.<sup>21</sup> Booster immunisation is recommended for young women to  
97 prevent maternal and neonatal tetanus. Recent evidence emphasises the need to protect young  
98 men also.<sup>25</sup>

### 99 ***Immunisation Postponement Criteria***

100 If any one of the following is identified at the time scheduled for immunisation, the participant may  
101 be immunised at a later date, or withdrawn, at the discretion of the Investigator. The participant  
102 must be followed until resolution of the event as with any adverse event:

- 103 • Acute disease at the time of immunisation. Acute disease is defined as the presence of a  
104 moderate or severe illness with or without fever. All vaccines can be administered to persons  
105 with a minor illness such as diarrhoea or mild upper respiratory infection with or without low-  
106 grade fever, i.e. temperature of  $\leq 37.5^{\circ}\text{C}$  ( $99.5^{\circ}\text{F}$ )
- 107 • Temperature of  $>37.5^{\circ}\text{C}$  ( $99.5^{\circ}\text{F}$ ) at the time of immunisation
- 108 • Taking antibiotics or antimalarials currently, or within the past 7 days, of the date of Ty21a  
109 administration (ascertained verbally)

### 110 ***Vaccine storage and transport***

111 In order to maintain a reliable vaccine cold chain, the vaccines and diluents to be used will be stored  
112 and transported within the recommended temperature range of  $+2^{\circ}\text{C}$  to  $+8^{\circ}\text{C}$ . Care will be taken to  
113 ensure that the vaccines are not frozen. BCG, being sensitive to light, will be kept in the dark  
114 (normally within its secondary packaging) for as long as possible to protect it during storage and  
115 transportation. All vaccines will be kept in appropriate refrigeration equipment with a temperature  
116 monitoring device to ensure temperatures remain between  $+2^{\circ}\text{C}$  and  $+8^{\circ}\text{C}$ . Cold boxes/vaccines  
117 carriers with temperature monitors will be used to transport vaccines and the diluents from the  
118 MRC/UVRI and LSHTM Uganda Research Unit (Entebbe) to Koome island and while transporting  
119 vaccines to immunisation sessions. Designated staff will be given responsibility for managing the

120 vaccine cold chain. All cold chain equipment including the temperature monitoring devices used for  
121 this project will comply with relevant technical specifications as defined by the EPI standards. Basic  
122 routine maintenance will be regularly carried out on all cold chain equipment.

### 123 ***Additional laboratory measurements***

124 Additional assays will comprise HIV serology, pregnancy testing and full blood counts. HIV testing  
125 and pregnancy testing will be accompanied by appropriate counselling by trained staff.

- 126 • **HIV serology** will be done on blood samples using rapid tests and according to prevailing  
127 national algorithms.<sup>26</sup> This will be done at baseline.
- 128 • **Pregnancy testing** will be done using urine samples and standard operating procedures for  
129 assessment of urine  $\beta$ -human chorionic gonadotropin ( $\beta$ hCG). This will be done at baseline  
130 and before immunisation on each immunisation day.
- 131 • **Full blood counts** will be conducted using a haematology analyser. Mild, moderate and  
132 severe anaemia will be defined according to WHO guidelines, by age.<sup>27</sup> This will be done at  
133 baseline to test for anaemia as part of the eligibility assessment, and pre-immunisation as  
134 part of the assessment of immunological profile.

135 Individuals found to be HIV positive or pregnant will be referred to appropriate providers for further  
136 care. Individuals with severe anaemia (haemoglobin <82g/L) will be excluded from the randomised  
137 intervention (since the intervention might be beneficial in management of anaemia). They will be  
138 treated for anaemia.

### 139 ***Sample handling and archive***

140 Blood and other samples will be processed according to local laboratory standard operating  
141 procedures (SOPs). All samples will reach the laboratory in anonymised form.

142 A sample archive will be developed. Although our current programme of work will address specific  
143 hypotheses regarding pathways of effects of parasites and interventions, the sample archive will  
144 provide a major asset for exploration of new leads arising from this work, or for an alternative,  
145 “systems biology” approach employing (for example) proteomic, genomic, epigenetic and  
146 transcriptomic analyses, and investigating the microbiome and virome. Information provided to  
147 participants, and consent forms, will include considerations of sample storage, and the possibility of  
148 sample analysis in laboratories within and outside Uganda. Participants will be able to decide if they  
149 will permit such future use of any leftover samples. We plan to store the samples for up to 20 years.  
150 If further storage is needed after that time, permission will be requested from the Uganda Virus  
151 Research Institute and London School of Hygiene and Tropical Medicine ethical review committees.

152 If they elect not to permit this, all of those leftover samples will be discarded after the completion of  
153 the work included in the current protocol.

#### 154 ***Operational considerations***

##### 155 *Programme governance*

156 A Programme Steering Committee has been set up to guide progress across all projects. This  
157 comprises the following:

- 158 • An independent chair
- 159 • Representatives from the Ministry of Health programmes for immunisation and for vector  
160 borne disease control
- 161 • Representatives of district authorities (Mukono and Jinja districts)
- 162 • Community representatives
- 163 • Principal investigator and co-investigators
- 164 • Project leader and post-doctoral immunologist
- 165 • Trial statistician
- 166 • Laboratory manager
- 167 • Medical Research Council observer

##### 168 *Informed consent*

169 Both written informed assent from the participants and written informed consent from a parent or  
170 guardian will be required for participation, although these may not necessarily be obtained at the  
171 same time. Information will be provided in both English and the appropriate local language. For  
172 individuals who cannot speak the languages used, or who cannot read or write, a witness who can  
173 read the information sheet and translate the information to the participant or parent/guardian will  
174 be used. Two different types of age specific assent forms will be used for the group of participants  
175 aged 9 – 12 years and for the group aged 13 – 17 years. Informed consent by emancipated or mature  
176 minors will be obtained using a designated consent form for these categories of participants.

177 The aims of the study, all tests, treatments and immunisations to be carried out and potential risks  
178 will be explained. The participant will be given the opportunity to ask about details of the trial, and  
179 will then have time to consider whether or not to participate. If they do decide to participate, they  
180 and their parent/guardian will sign and date two copies of the assent and consent forms, one for  
181 them to take away and keep, and one to be stored securely by the research team. Separate  
182 information and consent forms will be provided (i) for consent for storage of samples for future



183 studies and for anonymous sharing of data from this study and (ii) for possible genetic studies; the  
184 information sheet will explain that these data may be used in analyses related to this protocol.

#### 185 *Screening and Eligibility Assessment*

186 Once the informed consent process has been completed, and consent (and assent) given, a baseline  
187 medical history (including concomitant medication) will be collected. Vital signs will be checked and  
188 a physical examination will be performed. Inclusion and exclusion criteria will be checked.

189 Participants will undergo pre- and post-test counselling for HIV and (for girls) pregnancy testing by a  
190 trained and experienced nurse- or clinician-counsellor. Blood, urine and stool samples will be  
191 obtained, for tests as specified in the schedule of procedures. These tests are to exclude the major,  
192 immunomodulating co-infection, HIV, and conditions that might impact safety (anaemia,  
193 pregnancy).

#### 194 *Enrolment*

195 Participants who consent/assent, complete the screening processes, satisfy all the inclusion criteria  
196 and meet none of the exclusion criteria will be enrolled.

#### 197 *Discontinuation/withdrawal criteria*

198 In accordance with the principles of the current revision of the Declaration of Helsinki and any other  
199 applicable regulations, a participant has the right to withdraw from the study at any time and for any  
200 reason, and is not obliged to give his or her reasons for doing so. The Investigator may withdraw the  
201 participant at any time in the interests of the participant's health and well-being. In addition, the  
202 participant may withdraw/be withdrawn for any of the following reasons:

- 203 • Ineligibility (either arising during the study or retrospectively, having been overlooked at  
204 screening)
- 205 • Administrative decision by the Investigator
- 206 • Significant protocol deviation
- 207 • Participant non-compliance with study requirements
- 208 • An adverse event which requires discontinuation of the study involvement or results in  
209 inability to continue to comply with study procedures.

210 Any participant who becomes pregnant during the trial will be followed up until the end of the  
211 pregnancy but no further immunisations will be given unless indicated during pregnancy (as is the  
212 case for tetanus toxoid). The trial allocation for this participant will be unblinded and the participant  
213 will only be given further treatment if clinically indicated. The babies will also be followed up and

214 examined for any adverse effects. We will not routinely perform venepuncture in a pregnant  
215 participant.

216 The reason for withdrawal will be recorded in the case report form (CRF). If withdrawal is due to an  
217 AE, appropriate follow-up visits or medical care will be arranged, with the agreement of the  
218 participant, until the AE has resolved, stabilised or a non-trial related causality has been assigned.

219 If a participant withdraws from the study samples collected before their withdrawal from the trial  
220 will be used/ stored unless the participant specifically requests otherwise.

#### 221 *Trial discontinuation*

222 The trial will be discontinued in the event of new scientific information that renders continuation  
223 futile or unethical, or for any other reason, at the discretion of the Programme Steering Committee.

#### 224 *End of study definition*

225 The trial will be completed when the last participant enrolled into the trial has completed their final  
226 follow up visit.

#### 227 *Safety assessments and oversight*

228 No new investigational drug or product will be used in the proposed trial. However, standard  
229 approaches for monitoring safety and reporting of serious adverse events will be followed.

#### 230 *Monitoring*

231 The trial will be monitored by both internal and external monitors according to a pre-defined  
232 monitoring plan which will include a site initiation visit, monitoring visits at least annually, and a  
233 close-out visit. The monitors will assess patient safety, data integrity, and adherence to the protocol  
234 and to Good Clinical Research Practice procedures.

#### 235 ***Considerations regarding standard of care***

236 *S. mansoni* infection status will be determined retrospectively through assays conducted in bulk on  
237 stored samples (plasma CAA). These results will not, therefore, be useful to determine management  
238 of individual participants.

239 Participants in the standard treatment arm will receive lower levels of anthelmintic treatment.  
240 However, all trial arms will receive a minimum of well-implemented national standard of care.

241 Standard of care will comprise annual praziquantel treatment. Our own results from the Lake  
242 Victoria Island Intervention Study on Worms and Allergy-related diseases (LaVIISWA),<sup>28</sup> which  
243 compared annual versus quarterly intervention for schistosomiasis at community level over three

244 years, showed no advantage of quarterly treatment for morbidity outcomes attributed to  
245 schistosomiasis.

246 Schistosomiasis can cause anaemia. To manage the expected differential benefits of the  
247 interventions for anaemia, a full blood count will be performed at baseline, as discussed above;  
248 anaemic children will be managed appropriately and severely anaemic children excluded.

249 Albendazole will be provided twice a year to manage nematode infections (after collection of  
250 primary and secondary endpoint samples).

#### 251 ***Procedures to be followed in the event of abnormal findings***

252 Abnormal clinical findings from medical history, examination or blood tests will be assessed as to  
253 their clinical significance throughout the trials. If an abnormal test result is deemed clinically  
254 significant, it may be repeated. If a test remains clinically significant, the participant will be informed  
255 and appropriate medical care arranged as appropriate and with the permission of the participant.  
256 Specific details regarding findings, discussion with participants and resulting actions will be recorded  
257 in the clinical records. Decisions to exclude the participant from enrolling in the trial or to withdraw  
258 a participant from the trial will be at the discretion of the Investigator.

#### 259 ***Data and Safety Monitoring Board (DSMB)***

260 A data and safety monitoring board (DSMB) has been appointed to provide real-time safety  
261 oversight. The DSMB will be notified within 7 days of the Investigators' being aware of the  
262 occurrence of SAEs. The DSMB may recommend the Investigators to place the trial on hold if  
263 deemed necessary following an intervention-related SAE. The DSMB will be chaired by a clinician  
264 experienced in clinical trials. There will be a minimum of two other appropriately qualified  
265 committee members. In the case of events related to a blinded intervention, the DSMB can request  
266 unblinding. Membership will include a statistician, and at least one Ugandan member. All  
267 correspondence between Investigators and the DSMB will be conveyed by the Principal Investigator  
268 to the trial Sponsor. The Chair of the DSMB will be contacted for advice and independent review by  
269 the Investigator or trial Sponsor in the following situations:

- 270 • The occurrence of any SAE
- 271 • Any other situation where the Investigator or trial Sponsor feels independent advice or  
272 review is important

#### 273 ***Ethical and regulatory considerations***

274 *Further information regarding risks*

275 The immunisations to be given have recognised side effects which are usually mild and resolve  
276 spontaneously in a few days to one week. Parenteral vaccines are likely to result in pain and  
277 swelling at the site of injection and mild fever; very occasionally pain and swelling can be severe and  
278 associated with difficulty in moving the shoulder. Sometimes headache and tiredness occur. Rarely  
279 a vaccine may cause a severe allergic reaction. For most vaccines this is estimated at less than one  
280 in a million doses (but 1 in 55,000 for Yellow Fever vaccine).<sup>29</sup> Individuals with a history of a  
281 possible allergic reaction to drugs or vaccines, or to vaccine components including eggs or chicken  
282 proteins, will be excluded from the studies. The research team will be trained and prepared to  
283 manage severe allergic reactions.

284 Adverse reactions to Yellow Fever vaccine include severe nervous system reaction (about 1 person in  
285 125,000) and severe, life-threatening illness with organ failure (about 1 person in 250,000). The  
286 mortality for this severe, life-threatening adverse effect is reported as about 50%.<sup>29</sup>

287 BCG immunisation is likely to induce a scar in many cases. This may develop over several weeks,  
288 starting as a small papule at the injection site which may become ulcerated and then heal over a  
289 period of 2 to 5 months; and lymphadenopathy may develop. Occasionally a more severe local  
290 reaction occurs (estimated at 1 per 1,000-10,000 doses): for example, an abscess develops and scars  
291 may develop into keloids. Rarely BCG can cause disseminated disease (1 per 230,000 to 640,000  
292 doses), or disease in sites remote from the immunisation site. Disseminated BCG disease usually  
293 occurs in immunocompromised people: HIV positive people will be excluded from these studies.<sup>30</sup>  
294 BCG “pre-immunisation” may interfere with the response to the subsequent live vaccines; indeed  
295 our hypothesis, and published results, suggest that it may suppress replication of YF 17D vaccine.<sup>31</sup>  
296 However, this reduced replication has not been shown to correlate with, or result in, reduced levels  
297 of neutralising antibody titres (which are the desired protective outcome).<sup>13 31</sup>

298 Oral typhoid vaccine (Ty21a) may occasionally be associated with stomach pain, nausea, vomiting  
299 and (rarely) rash.<sup>29</sup>

300 Praziquantel has been in use for about 30 years. It has a well-recognised profile of side effects  
301 including dizziness, nausea, vomiting, abdominal pain, diarrhoea (sometimes with blood) and  
302 urticarial rash. The symptoms are considered to arise largely from the effects of killing worms and to  
303 be more severe in people with heavy infections. Symptoms are better tolerated when the drugs are  
304 given after food and we will provide treatment after a meal or snack. Simple medications, such as  
305 paracetamol and cetirizine, can alleviate symptoms and these will be available on treatment days.

306 **References**

- 307 1. Wajja A, Kizito D, Nassanga B, et al. The effect of current *Schistosoma mansoni* infection on the  
308 immunogenicity of a candidate TB vaccine, MVA85A, in BCG-vaccinated adolescents: An open-label trial.  
309 *PLoS neglected tropical diseases* 2017;11(5):e0005440. doi: 10.1371/journal.pntd.0005440 [published Online  
310 First: 2017/05/05]
- 311 2. WHO. Growth reference 5-19 years. 2007
- 312 3. WHO. Global tuberculosis report 2016 [http://www.who.int/tb/publications/global\\_report/en/](http://www.who.int/tb/publications/global_report/en/) (accessed 17  
313 June 2017), 2016.
- 314 4. Alcais A, Fieschi C, Abel L, et al. Tuberculosis in children and adults: two distinct genetic diseases. *J Exp Med*  
315 2005;202(12):1617-21. doi: 10.1084/jem.20052302
- 316 5. Weiner J, 3rd, Kaufmann SH. Recent advances towards tuberculosis control: vaccines and biomarkers. *J*  
317 *Intern Med* 2014;275(5):467-80. doi: 10.1111/joim.12212
- 318 6. Fine PE. Variation in protection by BCG: implications of and for heterologous immunity. *Lancet (London,*  
319 *England)* 1995;346(8986):1339-45.
- 320 7. Barreto ML, Pilger D, Pereira SM, et al. Causes of variation in BCG vaccine efficacy: examining evidence from  
321 the BCG REVAC cluster randomized trial to explore the masking and the blocking hypotheses. *Vaccine*  
322 2014;32(30):3759-64. doi: 10.1016/j.vaccine.2014.05.042
- 323 8. Black GF, Weir RE, Floyd S, et al. BCG-induced increase in interferon-gamma response to mycobacterial  
324 antigens and efficacy of BCG vaccination in Malawi and the UK: two randomised controlled studies. *Lancet*  
325 *(London, England)* 2002;359(9315):1393-401. doi: 10.1016/S0140-6736(02)08353-8
- 326 9. Tanner R, Kakalacheva K, Miller E, et al. Serum indoleamine 2,3-dioxygenase activity is associated with  
327 reduced immunogenicity following vaccination with MVA85A. *BMC infectious diseases* 2014;14:660. doi:  
328 10.1186/s12879-014-0660-7 [published Online First: 2014/12/04]
- 329 10. WHO. SAGE Evidence to recommendations framework. 2017.  
330 [http://www.who.int/immunization/sage/meetings/2017/october/2\\_EvidencetoRecommendationFramework](http://www.who.int/immunization/sage/meetings/2017/october/2_EvidencetoRecommendationFramework_BCG.pdf)  
331 [BCG.pdf](http://www.who.int/immunization/sage/meetings/2017/october/2_EvidencetoRecommendationFramework_BCG.pdf) (accessed 16th March 2018).
- 332 11. Dye C. Making wider use of the world's most widely used vaccine: Bacille Calmette-Guerin revaccination  
333 reconsidered. *Journal of the Royal Society, Interface* 2013;10(87):20130365. doi: 10.1098/rsif.2013.0365  
334 [published Online First: 2013/08/02]
- 335 12. Kraemer MU, Faria NR, Reiner RC, Jr., et al. Spread of yellow fever virus outbreak in Angola and the  
336 Democratic Republic of the Congo 2015-16: a modelling study. *The Lancet Infectious diseases* 2016 doi:  
337 10.1016/s1473-3099(16)30513-8 [published Online First: 2016/12/27]
- 338 13. Muyanja E, Ssemaganda A, Ngauv P, et al. Immune activation alters cellular and humoral responses to  
339 yellow fever 17D vaccine. *The Journal of clinical investigation* 2014;124(7):3147-58. doi: 10.1172/jci75429  
340 [published Online First: 2014/06/10]
- 341 14. Aguiar M, Stollenwerk N, Halstead SB. The Impact of the Newly Licensed Dengue Vaccine in Endemic  
342 Countries. *PLoS neglected tropical diseases* 2016;10(12):e0005179. doi: 10.1371/journal.pntd.0005179  
343 [published Online First: 2016/12/22]
- 344 15. Dharmasena MN, Osorio M, Filipova S, et al. Stable expression of *Shigella dysenteriae* serotype 1 O-antigen  
345 genes integrated into the chromosome of live *Salmonella* oral vaccine vector Ty21a. *Pathogens and disease*  
346 2016 doi: 10.1093/femspd/ftw098 [published Online First: 2016/09/23]

- 347 16. Carias C, Walters MS, Wefula E, et al. Economic evaluation of typhoid vaccination in a prolonged typhoid  
348 outbreak setting: the case of Kasese district in Uganda. *Vaccine* 2015;33(17):2079-85. doi:  
349 10.1016/j.vaccine.2015.02.027 [published Online First: 2015/02/26]
- 350 17. Melhem RF, LoVerde PT. Mechanism of interaction of Salmonella and Schistosoma species. *Infection and*  
351 *immunity* 1984;44(2):274-81. [published Online First: 1984/05/01]
- 352 18. Muniz-Junqueira MI, Tavares-Neto J, Prata A, et al. Antibody response to Salmonella typhi in human  
353 schistosomiasis mansoni. *Revista da Sociedade Brasileira de Medicina Tropical* 1996;29(5):441-5. [published  
354 Online First: 1996/09/01]
- 355 19. WHO. Position Paper on Typhoid vaccines: WHO position paper – March 2018 2018
- 356 20. Brown J, Baisley K, Kavishe B, et al. Impact of malaria and helminth infections on immunogenicity of the  
357 human papillomavirus-16/18 AS04-adjuvanted vaccine in Tanzania. *Vaccine* 2014;32(5):611-7. doi:  
358 10.1016/j.vaccine.2013.11.061
- 359 21. Riner DK, Ndombi EM, Carter JM, et al. Schistosoma mansoni Infection Can Jeopardize the Duration of  
360 Protective Levels of Antibody Responses to Immunizations against Hepatitis B and Tetanus Toxoid. *PLoS*  
361 *neglected tropical diseases* 2016;10(12):e0005180. doi: 10.1371/journal.pntd.0005180
- 362 22. Centre HI. HPV and related diseases report: Uganda. 2016.  
363 <http://www.hpvcentre.net/statistics/reports/UGA.pdf> (accessed 20.01.2017).
- 364 23. WHO. Human papillomavirus vaccines: WHO position paper, May 2017. *Releve epidemiologique*  
365 *hebdomadaire* 2017;92(19):241-68. [published Online First: 2017/05/23]
- 366 24. Sabin EA, Araujo MI, Carvalho EM, et al. Impairment of tetanus toxoid-specific Th1-like immune responses  
367 in humans infected with Schistosoma mansoni. *The Journal of infectious diseases* 1996;173(1):269-72.  
368 [published Online First: 1996/01/01]
- 369 25. Nanteza B, Galukande M, Aceng J, et al. The burden of tetanus in Uganda. *SpringerPlus* 2016;5(1):705. doi:  
370 10.1186/s40064-016-2309-z [published Online First: 2016/06/29]
- 371 26. Ministry of Health–Uganda. Uganda Clinical Guidelines 2016.  
372 <http://apps.who.int/medicinedocs/documents/s23532en/s23532en.pdf>
- 373 27. WHO. Haemoglobin concentrations for the diagnosis of anaemia and assessment of severity. Vitamin and  
374 Mineral Nutrition Information System. Geneva, World Health Organization, 2011  
375 (WHO/NMH/NHD/MNM/11.1).
- 376 28. Sanya RE, Nkurunungi G, Hoek Spaans R, et al. The Impact of Intensive Versus Standard Anthelmintic  
377 Treatment on Allergy-related Outcomes, Helminth Infection Intensity, and Helminth-related Morbidity in  
378 Lake Victoria Fishing Communities, Uganda: Results From the LaVIISWA Cluster-randomized Trial. *Clinical*  
379 *Infectious Diseases* 2018:ciy761-ciy61. doi: 10.1093/cid/ciy761
- 380 29. CDC. Centers for Disease Control and Prevention, vaccines and immunizations.
- 381 30. WHO. Information sheet observed rate of vaccine reactions Bacille Calmette-Guérin (BCG) vaccine. 2012
- 382 31. Arts RJW, Moorlag S, Novakovic B, et al. BCG Vaccination Protects against Experimental Viral Infection in  
383 Humans through the Induction of Cytokines Associated with Trained Immunity. *Cell host & microbe*  
384 2018;23(1):89-100.e5. doi: 10.1016/j.chom.2017.12.010 [published Online First: 2018/01/13]  
385
